# Supplementary material for: Comparative transcriptome profiling reveals differential defense responses among Alternaria brassicicola resistant Sinapis alba and susceptible Brassica rapa
Source: Front Plant Sci. 2024 Jan 18;14:1251349. doi: 10.3389/fpls.2023.1251349 (PMC10831657; doi:10.3389/fpls.2023.1251349)
Supplement: Supplementary file 2 [file DataSheet_2.xlsx]

## Sheet: Common_Upregulated DEGs
gene_id	locus	value_T1	value_S1	log2.fold_changeT1VsS1	value_T2	value_S2	log2.fold_change..T2VsS2	description
Bra000044	A03:8993446-8999414	0	0.784092	Inf	0	0.644528	Inf	AT4G26690 (E=1e-238) SHV3, MRH5, GPDL2 | SHV3 (SHAVEN 3); glycerophosphodiester phosphodiesterase/ kinase
Bra000823	A03:13361348-13362854	0	6.95033	Inf	0	1.80132	Inf	AT4G03440 (E=3e-075) | ankyrin repeat family protein
Bra003019	A10:6012529-6014119	0	0.46575	Inf	0	3.8345	Inf	AT5G25180 (E=3e-226) CYP71B14 | CYP71B14; electron carrier/ heme binding / iron ion binding / monooxygenase/ oxygen binding
Bra003122	A10:4940823-4942858	0	288.775	Inf	0	40.2372	Inf	None
Bra005748	A03:417042-422779	0	0.59832	Inf	0	0.502981	Inf	AT5G02880 (E=0.0) UPL4 | UPL4; ubiquitin-protein ligase
Bra005916	A03:1209671-1211071	0	7.3837	Inf	0	0.830103	Inf	AT5G06870 (E=4e-124) PGIP2, ATPGIP2 | PGIP2 (POLYGALACTURONASE INHIBITING PROTEIN 2); protein binding
Bra006378	A03:3262004-3264587	0	2.78072	Inf	0	4.68272	Inf	AT5G16890 (E=3e-248) | exostosin family protein
Bra007452	A09:29276121-29277545	0	6.43808	Inf	0	3.92187	Inf	AT3G59480 (E=2e-176) | pfkB-type carbohydrate kinase family protein
Bra007915	A02:11824042-11827008	0	2.58556	Inf	0	1.08774	Inf	AT1G70460 (E=1e-229) | protein kinase, putative
Bra008446	A02:15687193-15691058	0	0.837633	Inf	0	2.34792	Inf	AT1G80680 (E=0.0) SAR3, MOS3, PRE, NUP96 | SAR3 (SUPPRESSOR OF AUXIN RESISTANCE 3); porin
Bra008527	A02:16207341-16208899	0	1.58242	Inf	0	2.37266	Inf	AT4G00660 (E=2e-109) | DEAD/DEAH box helicase, putative
Bra009148	A10:15422960-15425000	0	3.25219	Inf	0	15.4739	Inf	AT3G26310 (E=2e-080) CYP71B35 | CYP71B35; electron carrier/ heme binding / iron ion binding / monooxygenase/ oxygen binding
Bra010185	A06:20678010-20679380	0	1.17066	Inf	0	0.439669	Inf	AT1G32780 (E=4e-118) | alcohol dehydrogenase, putative
Bra010187	A06:20721051-20724402	0	0.51315	Inf	0	0.287745	Inf	AT1G32850 (E=2e-144) UBP11 | UBP11 (UBIQUITIN-SPECIFIC PROTEASE 11); cysteine-type endopeptidase/ ubiquitin thiolesterase
Bra010541	A08:15052896-15054043	0	83.2525	Inf	0	4.86797	Inf	AT2G01520 (E=7e-076) MLP328 | MLP328 (MLP-LIKE PROTEIN 328); copper ion binding
Bra010664	A08:15867970-15869232	0	1.66982	Inf	0	10.6891	Inf	AT4G13360 (E=1e-096) | catalytic
Bra011461	A01:2081108-2085592	0	4.1021	Inf	0	1.72741	Inf	AT4G33680 (E=2e-237) AGD2 | AGD2 (ABERRANT GROWTH AND DEATH 2); L,L-diaminopimelate aminotransferase/ transaminase
Bra012825	A03:22063854-22067131	0	24.9716	Inf	0	86.9706	Inf	AT3G52040 (E=2e-038) | unknown protein
Bra012904	A03:21609073-21611127	0	3.0917	Inf	0	0.33053	Inf	AT3G50170 (E=1e-213) | unknown protein
Bra013059	A03:20703860-20706706	0	1.23505	Inf	0	7.54697	Inf	AT2G16660 (E=1e-225) | nodulin family protein
Bra014890	A07:5547891-5550375	0	2.97967	Inf	0	3.34453	Inf	AT1G30760 (E=1e-249) | FAD-binding domain-containing protein
Bra014905	A07:5364199-5365779	0	12.1553	Inf	0	48.6561	Inf	AT1G31300 (E=1e-150) | FUNCTIONS IN: molecular_function unknown; INVOLVED IN: biological_process unknown; LOCATED IN: integral to membrane; EXPRESSED IN: 24 plant structures; EXPRESSED DURING: 13 growth stages; CONTAINS InterPro DOMAIN/s: TRAM, LAG1 and CLN8 homology (InterPro:IPR006634); BEST Arabidopsis thaliana protein match is: unknown protein (TAIR:AT4G19645.2); Has 478 Blast hits to 478 pro…
Bra015019	A07:4244051-4244474	0	8.99098	Inf	0	76.8923	Inf	AT3G23300 (E=2e-039) | dehydration-responsive protein-related
Bra015514	A10:1306791-1307733	0	24.8941	Inf	0	9.35023	Inf	AT1G06640 (E=6e-114) | 2-oxoglutarate-dependent dioxygenase, putative
Bra017088	A04:16665663-16669147	0	0.82881	Inf	0	1.86049	Inf	AT2G39130 (E=3e-235) | amino acid transporter family protein
Bra017431	A09:15263383-15265645	0	4.88761	Inf	0	4.20736	Inf	AT2G01970 (E=9e-145) | endomembrane protein 70, putative
Bra018396	A05:7959553-7961536	0	3.32558	Inf	0	2.4972	Inf	AT2G30670 (E=2e-114) | tropinone reductase, putative / tropine dehydrogenase, putative
Bra019282	A03:25258471-25260053	0	17.8971	Inf	0	10.9255	Inf	AT4G23650 (E=4e-206) CDPK6, CPK3 | CDPK6 (CALCIUM-DEPENDENT PROTEIN KINASE 6); ATP binding / calcium ion binding / calmodulin-dependent protein kinase/ kinase/ protein kinase/ protein serine/threonine kinase
Bra019543	A06:12356518-12358533	0	13.278	Inf	0	19.9634	Inf	AT3G48420 (E=6e-081) | haloacid dehalogenase-like hydrolase family protein
Bra020434	A02:6741618-6742661	0	2.92835	Inf	0	12.0859	Inf	AT5G57550 (E=4e-146) XTR3 | XTR3 (XYLOGLUCAN ENDOTRANSGLYCOSYLASE 3); hydrolase, acting on glycosyl bonds / xyloglucan:xyloglucosyl transferase
Bra020691	A02:23730235-23732593	0	0.533124	Inf	0	0.997887	Inf	AT5G48560 (E=9e-101) | basic helix-loop-helix (bHLH) family protein
Bra021001	A08:10614925-10615903	0	2.39087	Inf	0	0.904171	Inf	AT4G18596 (E=2e-085) | pollen Ole e 1 allergen and extensin family protein
Bra021090	A01:24092144-24098807	0	23.8715	Inf	0	2.80265	Inf	AT1G65960 (E=4e-259) GAD2 | GAD2 (GLUTAMATE DECARBOXYLASE 2); calmodulin binding / glutamate decarboxylase
Bra021308	A01:22541419-22543050	0	1.90782	Inf	0	1.90554	Inf	AT1G61860 (E=3e-202) | protein kinase, putative
Bra022707	A02:7891021-7891617	0	728.029	Inf	0	557.942	Inf	AT5G54270 (E=2e-050) LHCB3, LHCB3*1 | LHCB3 (LIGHT-HARVESTING CHLOROPHYLL B-BINDING PROTEIN 3); structural molecule
Bra023689	A02:4545002-4551012	0	1.86361	Inf	0	1.3232	Inf	AT5G18620 (E=3e-274) CHR17 | CHR17 (CHROMATIN REMODELING FACTOR17); ATP binding / DNA binding / DNA-dependent ATPase/ helicase/ hydrolase, acting on acid anhydrides, in phosphorus-containing anhydrides / nucleic acid binding / nucleosome binding
Bra023862	A01:20534876-20536581	0	6.35643	Inf	0	2.68057	Inf	AT3G21770 (E=3e-166) | peroxidase 30 (PER30) (P30) (PRXR9)
Bra023893	A01:20872007-20877403	0	0.416274	Inf	0	0.0518406	Inf	AT3G21250 (E=0.0) ATMRP6, MRP6 | ATMRP6; ATPase, coupled to transmembrane movement of substances
Bra026086	A06:6197657-6202222	0	0.30338	Inf	0	0.453744	Inf	AT1G15990 (E=0.0) ATCNGC7, CNGC7 | ATCNGC7 (CYCLIC NUCLEOTIDE GATED CHANNEL 7); calmodulin binding / cyclic nucleotide binding / ion channel
Bra026626	A02:20853415-20856358	0	3.35082	Inf	0	0.836369	Inf	AT2G01900 (E=6e-205) | endonuclease/exonuclease/phosphatase family protein
Bra027391	A05:20671333-20675997	0	1.38701	Inf	0	1.14083	Inf	AT3G13870 (E=8e-202) RHD3 | RHD3 (ROOT HAIR DEFECTIVE 3); GTP binding
Bra030295	A04:9297197-9298604	0	2.95908	Inf	0	1.48041	Inf	AT2G21520 (E=7e-151) | transporter
Bra031435	A01:17476682-17478091	0	6.43728	Inf	0	1.62052	Inf	AT1G61340 (E=2e-064) | F-box family protein
Bra031927	A02:27070986-27072254	0	9.77294	Inf	0	0.333197	Inf	AT5G64260 (E=9e-157) EXL2 | EXL2 (EXORDIUM LIKE 2)
Bra033733	A06:25348983-25360537	0	3.90821	Inf	0	0.487979	Inf	AT1G77520 (E=1e-171) | O-methyltransferase family 2 protein
Bra036938	Scaffold000123:115065-116132	0	51.3994	Inf	0	16.7279	Inf	AT1G44000 (E=1e-126) | unknown protein
Bra036992	A03:29042170-29045522	0	5.35616	Inf	0	7.30462	Inf	AT4G33630 (E=3e-281) EX1 | EX1 (EXECUTER1)
Bra038676	A01:26653864-26655829	0	8.27564	Inf	0	14.9565	Inf	AT3G11730 (E=7e-109) ATFP8, ATRABD1, RABD1 | ATFP8; GTP binding / GTP-dependent protein binding / myosin XI tail binding
Bra039484	A05:9339141-9340422	0	8.90218	Inf	0	1.3417	Inf	AT5G35620 (E=3e-094) LSP1, EIF(ISO)4E, LSP, EIF4E2 | LSP1 (LOSS OF SUSCEPTIBILITY TO POTYVIRUS 1); RNA 7-methylguanosine cap binding / RNA binding / translation initiation factor
Bra039863	A08:6219369-6220902	0	4.50134	Inf	0	0.673753	Inf	AT1G30560 (E=1e-279) | transporter, putative
Bra039895	A07:1804045-1804540	0	56.9208	Inf	0	10.0506	Inf	AT3G53470 (E=3e-036) | unknown protein
Bra040469	Scaffold000209:33283-33808	0	276.383	Inf	0	87.0544	Inf	AT1G60950 (E=5e-050) FED A, ATFD2 | FED A; 2 iron, 2 sulfur cluster binding / electron carrier/ iron-sulfur cluster binding
Bra000136	A03:9480669-9486331	1.40192	6.0235	2.1032	0.798487	5.67973	2.83048	AT2G39480 (E=0.0) PGP6 | PGP6 (P-GLYCOPROTEIN 6); ATPase, coupled to transmembrane movement of substances
Bra000149	A03:9558362-9561216	17.0244	116.347	2.77276	12.1256	73.9126	2.60776	AT2G39770 (E=5e-201) CYT1, VTC1, SOZ1, EMB101, GMP1 | CYT1 (CYTOKINESIS DEFECTIVE 1); mannose-1-phosphate guanylyltransferase/ nucleotidyltransferase
Bra000362	A03:10731474-10733150	0.144781	6.39539	5.46509	0.141317	1.80543	3.67534	AT2G44745 (E=1e-084) | WRKY family transcription factor
Bra000377	A03:10818451-10818847	1326.92	4803.3	1.85594	100.049	3081.68	4.94494	AT2G45180 (E=3e-041) | protease inhibitor/seed storage/lipid transfer protein (LTP) family protein
Bra000385	A03:10859170-10862804	0.552167	7.68162	3.79823	1.15138	4.51924	1.97271	AT2G45310 (E=3e-221) GAE4 | GAE4 (UDP-D-GLUCURONATE 4-EPIMERASE 4); binding / catalytic/ coenzyme binding / racemase and epimerase, acting on carbohydrates and derivatives
Bra000447	A03:11170930-11173383	1.08647	3.23751	1.57524	1.04412	6.41664	2.61953	AT2G47330 (E=1e-281) | DEAD/DEAH box helicase, putative
Bra000483	A03:11334344-11334812	60.5911	794.726	3.71328	88.8329	1763.39	4.31112	AT1G07790 (E=6e-051) HTB1 | HTB1; DNA binding
Bra000497	A03:11423866-11424241	0.131531	34.7999	8.04753	1.4336	49.1429	5.09927	AT2G28085 (E=6e-063) | auxin-responsive family protein
Bra000593	A03:11953201-11953993	4.16889	28.6527	2.78094	5.84472	180.807	4.95117	AT5G49700 (E=2e-100) | DNA-binding protein-related
Bra000605	A03:12016046-12018091	9.36612	92.832	3.3091	5.30044	127.255	4.58547	AT5G50000 (E=1e-211) | protein kinase, putative
Bra000613	A03:12056380-12057317	4.79584	62.8949	3.71309	4.39155	183.841	5.38758	AT5G50200 (E=2e-074) WR3 | WR3 (WOUND-RESPONSIVE 3); nitrate transmembrane transporter
Bra000635	A03:12159418-12161838	0.0781933	4.38888	5.81066	0.00910736	0.58613	6.00804	AT4G07960 (E=0.0) ATCSLC12, CSLC12 | ATCSLC12 (CELLULOSE-SYNTHASE LIKE C12); cellulose synthase/ transferase, transferring glycosyl groups
Bra000713	A03:12622000-12626929	0.198466	5.83816	4.87855	0.40464	3.82852	3.24208	AT4G10500 (E=2e-172) | oxidoreductase, 2OG-Fe(II) oxygenase family protein
Bra001037	A03:14476981-14479003	1.04661	11.3674	3.44111	1.90707	11.713	2.61868	AT3G02230 (E=2e-211) RGP1, ATRGP1 | RGP1 (REVERSIBLY GLYCOSYLATED POLYPEPTIDE 1); cellulose synthase (UDP-forming)
Bra001229	A03:15432536-15435343	0.150074	5.22529	5.12177	0.0607437	0.781709	3.68583	AT3G07020 (E=6e-309) | UDP-glucose:sterol glucosyltransferase (UGT80A2)
Bra001575	A03:17149579-17154147	0.170585	1.28949	2.91824	0.0249477	0.0803245	1.68693	AT3G14940 (E=0.0) ATPPC3 | ATPPC3 (PHOSPHOENOLPYRUVATE CARBOXYLASE 3); phosphoenolpyruvate carboxylase
Bra001728	A03:18091463-18092843	0.720689	5.12762	2.83084	0.253788	0.76774	1.597	AT3G18950 (E=5e-208) | transducin family protein / WD-40 repeat family protein
Bra001766	A03:18327913-18329841	0.0101083	1.33759	7.04795	0.116744	2.83622	4.60255	AT3G19930 (E=4e-267) STP4, ATSTP4 | STP4 (SUGAR TRANSPORTER 4); carbohydrate transmembrane transporter/ monosaccharide transmembrane transporter/ sucrose:hydrogen symporter/ sugar:hydrogen symporter
Bra001899	A03:19225290-19225893	4.81511	21.5178	2.15989	6.54092	66.9087	3.35463	AT3G23030 (E=1e-081) IAA2 | IAA2 (INDOLE-3-ACETIC ACID INDUCIBLE 2); transcription factor
Bra001970	A10:12624623-12629275	3.41179	17.7416	2.37853	2.48567	7.86953	1.66264	AT4G34450 (E=0.0) | coatomer gamma-2 subunit, putative / gamma-2 coat protein, putative / gamma-2 COP, putative
Bra001983	A10:12487631-12488804	1.07986	7.68562	2.83132	0.762907	4.03284	2.40222	AT2G16630 (E=2e-062) | proline-rich family protein
Bra002007	A10:12259468-12260698	0.0290447	2.56499	6.46453	0.0376536	3.37362	6.48536	AT3G44150 (E=4e-116) | unknown protein
Bra002096	A10:11498392-11501695	0.179247	3.16286	4.14121	0.107448	1.18399	3.46195	AT2G17840 (E=1e-194) ERD7 | ERD7 (EARLY-RESPONSIVE TO DEHYDRATION 7)
Bra002162	A10:11171860-11174294	2.09077	8.64533	2.04789	6.3096	51.7507	3.03596	AT5G18490 (E=7e-292) | unknown protein
Bra002246	A10:10684360-10686961	0.0401477	0.885424	4.46298	0.0515177	1.8222	5.14447	AT5G19560 (E=6e-208) ATROPGEF10, ROPGEF10 | ROPGEF10 (ROP UANINE NUCLEOTIDE EXCHANGE FACTOR 10); Rho guanyl-nucleotide exchange factor
Bra002461	A10:9388604-9392588	2.01135	12.8574	2.67636	1.70789	8.97989	2.39448	AT4G24280 (E=6e-256) cpHsc70-1 | cpHsc70-1 (chloroplast heat shock protein 70-1); ATP binding
Bra002894	A10:6908009-6909449	0.0771608	0.486233	2.65571	0.0424566	0.18198	2.09972	AT4G08250 (E=1e-200) | scarecrow transcription factor family protein
Bra003120	A10:4980441-4982217	0.410297	6.03201	3.8779	0.832954	6.62793	2.99225	AT5G52630 (E=7e-296) MEF1 | MEF1 (MITOCHONDRIAL RNA EDITING FACTOR 1)
Bra003607	A07:14038248-14042301	2.65517	72.8693	4.77843	4.23253	43.7594	3.37	AT1G79510 (E=4e-111) | unknown protein
Bra003674	A07:14389452-14391771	0.517766	7.44762	3.84641	0.260152	5.38922	4.37265	AT1G77690 (E=1e-251) LAX3 | LAX3 (LIKE AUX1 3); amino acid transmembrane transporter/ auxin influx transmembrane transporter/ transporter
Bra003712	A07:14635659-14636199	1.47359	6.51147	2.14365	0.128751	8.19722	5.99248	AT1G76650 (E=8e-078) CML38 | calcium-binding EF hand family protein
Bra003713	A07:14641599-14642274	6.40538	40.0044	2.6428	5.29379	84.3558	3.99412	AT1G76610 (E=2e-090) | unknown protein
Bra003737	A07:14780491-14783856	0.18554	16.3757	6.46368	0.143506	14.7341	6.6819	AT1G75880 (E=6e-131) | family II extracellular lipase 1 (EXL1)
Bra003946	A07:15913962-15917747	0.0861786	6.65237	6.2704	0.0138285	1.95612	7.1442	AT1G70710 (E=1e-270) ATGH9B1, CEL1 | ATGH9B1 (ARABIDOPSIS THALIANA GLYCOSYL HYDROLASE 9B1); cellulase/ hydrolase, hydrolyzing O-glycosyl compounds
Bra003970	A07:16038903-16039723	1.744	22.5725	3.6941	1.48211	30.4441	4.36044	AT1G69930 (E=7e-129) ATGSTU11 | ATGSTU11 (GLUTATHIONE S-TRANSFERASE TAU 11); glutathione transferase
Bra004055	A07:16563239-16565408	97.8561	916.232	3.22698	63.2623	594.754	3.23288	AT1G68010 (E=5e-209) HPR | HPR; glycerate dehydrogenase/ poly(U) binding
Bra004310	A07:17891845-17893596	0.102657	1.00631	3.29317	0.0146474	0.753316	5.68454	AT1G68470 (E=1e-213) | exostosin family protein
Bra004336	A07:18071253-18072912	1.52275	18.8758	3.63179	0.0485124	0.415707	3.09914	AT1G68780 (E=1e-199) | leucine-rich repeat family protein
Bra004600	A05:985596-988672	5.39116	16.2915	1.59545	2.42475	10.3023	2.08705	AT2G41140 (E=3e-292) CRK1, ATCRK1, ATCBK3 | CRK1 (CDPK-RELATED KINASE 1); calcium ion binding / calcium-dependent protein serine/threonine phosphatase/ calmodulin-dependent protein kinase/ kinase
Bra004708	A05:1429635-1432586	0.403407	2.05375	2.34795	0.139779	0.769423	2.46063	AT2G42570 (E=1e-192) | unknown protein
Bra004732	A05:1557906-1558692	0.681998	6.69061	3.2943	1.33984	5.02419	1.90683	AT2G42940 (E=6e-112) | DNA-binding family protein
Bra004765	A05:1726608-1728070	0.0953857	6.3159	6.04907	0.0308278	2.37065	6.26491	AT4G37470 (E=5e-133) | hydrolase, alpha/beta fold family protein
Bra005096	A05:3401763-3405030	0.201955	1.78138	3.14089	0.134617	2.39857	4.15524	AT3G52850 (E=7e-312) VSR1, BP-80, ATELP, VSR-1, BP80, BP80B, ATELP1, ATVSR1 | VSR1 (VACUOLAR SORTING RECEPTOR HOMOLOG 1); amino-terminal vacuolar sorting propeptide binding
Bra005102	A05:3432807-3433882	0.142941	2.70369	4.24144	0.184448	1.01404	2.45882	AT2G38500 (E=3e-138) | FUNCTIONS IN: molecular_function unknown; INVOLVED IN: biological_process unknown; EXPRESSED IN: 7 plant structures; EXPRESSED DURING: L mature pollen stage, M germinated pollen stage, 4 anthesis, petal differentiation and expansion stage; BEST Arabidopsis thaliana protein match is: DTA4 (DOWNSTREAM TARGET OF AGL15-4) (TAIR:AT1G79760.1); Has 26 Blast hits to 26 proteins in …
Bra005268	A05:4422081-4430211	0.100899	6.99538	6.11542	0.0370795	4.76384	7.00536	AT2G36400 (E=4e-133) AtGRF3 | AtGRF3 (GROWTH-REGULATING FACTOR 3); transcription activator
Bra005301	A05:4643802-4646678	0.383136	7.24976	4.242	0.212677	37.2189	7.45122	AT2G36080 (E=1e-091) | DNA-binding protein, putative
Bra005423	A05:5412313-5414298	1.03477	318.107	8.26406	0.31172	353.297	10.1464	AT2G34420 (E=8e-101) LHB1B2, LHCB1.5 | LHB1B2; chlorophyll binding
Bra005425	A05:5425896-5427692	272.797	830.582	1.60629	27.2401	490.984	4.17187	AT2G34430 (E=2e-149) LHB1B1, LHCB1.4 | LHB1B1; chlorophyll binding
Bra005613	A05:6531720-6533358	27.3239	117.381	2.10296	17.6666	176.494	3.32052	AT2G32080 (E=1e-139) PUR ALPHA-1 | PUR ALPHA-1; nucleic acid binding
Bra005666	A03:53505-54081	2.37355	49.5744	4.38448	0.225505	2.15688	3.25772	AT5G01790 (E=2e-058) | unknown protein
Bra005831	A03:830119-831082	3.35033	150.328	5.48767	2.89558	25.0833	3.1148	AT5G04950 (E=6e-173) NAS1, ATNAS1 | NAS1 (NICOTIANAMINE SYNTHASE 1); nicotianamine synthase
Bra006254	A03:2707056-2711868	8.13439	29.5301	1.86008	6.71479	25.0904	1.90173	AT5G14430 (E=0.0) | dehydration-responsive protein-related
Bra006348	A03:3129851-3132080	0.314952	3.47232	3.4627	0.00840412	1.08189	7.00824	AT5G16300 (E=0.0) | FUNCTIONS IN: molecular_function unknown; INVOLVED IN: biological_process unknown; LOCATED IN: cellular_component unknown; EXPRESSED IN: 23 plant structures; EXPRESSED DURING: 13 growth stages; CONTAINS InterPro DOMAIN/s: Vps51/Vps67 (InterPro:IPR014812); Has 199 Blast hits to 182 proteins in 76 species: Archae - 0; Bacteria - 0; Metazoa - 122; Fungi - 34; Plants - 24; Viruses…
Bra006947	A09:26406479-26408290	0.194688	0.780619	2.00345	0.113485	0.73004	2.68548	AT5G24240 (E=2e-277) | phosphatidylinositol 3- and 4-kinase family protein / ubiquitin family protein
Bra007095	A09:27278041-27278685	0.174387	26.9671	7.27277	0.227865	4.35841	4.25755	AT5G65380 (E=4e-071) | ripening-responsive protein, putative
Bra007297	A09:28450136-28455841	0.0986956	0.300115	1.60446	0.02611	0.112131	2.10251	AT3G57060 (E=0.0) | binding
Bra007346	A09:28738080-28739874	0.317596	6.13219	4.27114	0.153635	1.31407	3.09646	AT3G57670 (E=2e-138) NTT | NTT (NO TRANSMITTING TRACT); nucleic acid binding / transcription factor/ zinc ion binding
Bra007380	A09:28911508-28913350	2.0771	7.49973	1.85227	0.292149	2.49942	3.09682	AT3G58120 (E=2e-111) ATBZIP61, BZIP61 | BZIP61; DNA binding / transcription activator/ transcription factor
Bra007636	A09:30183565-30185321	0.0387783	2.99323	6.27031	0.0124379	0.959937	6.27013	AT3G61880 (E=6e-270) CYP78A9 | CYP78A9 (CYTOCHROME P450 78A9); monooxygenase/ oxygen binding
Bra007646	A09:30262435-30263314	5.95386	17.8956	1.58771	5.09681	23.3198	2.19389	AT3G61970 (E=1e-112) NGA2 | NGA2 (NGATHA2); transcription factor
Bra007821	A09:31064649-31065294	0.149075	24.1537	7.34006	0.130291	1.65881	3.67035	AT2G25060 (E=2e-076) | plastocyanin-like domain-containing protein
Bra007824	A09:31084665-31088203	0.0669342	1.47674	4.46353	0.0215499	0.553402	4.68258	AT5G50375 (E=2e-084) CPI1 | CPI1 (CYCLOPROPYL ISOMERASE); cycloeucalenol cycloisomerase
Bra007844	A09:31214824-31217416	0.0277043	3.05564	6.78522	0.0890578	16.0209	7.49099	AT2G24500 (E=2e-155) FZF | FZF; transcription factor
Bra007886	A02:11592370-11599083	0.435941	1.508	1.79043	0.164399	2.25632	3.7787	AT1G69870 (E=1e-275) | proton-dependent oligopeptide transport (POT) family protein
Bra007991	A02:12371631-12373360	1.43879	79.1053	5.78085	1.24824	18.2285	3.86823	AT1G71880 (E=2e-219) SUC1, ATSUC1 | SUC1 (Sucrose-proton symporter 1); carbohydrate transmembrane transporter/ sucrose:hydrogen symporter/ sugar:hydrogen symporter
Bra008437	A02:15638178-15643177	4.01984	19.6698	2.29077	4.99203	36.3176	2.86297	AT1G80830 (E=2e-269) NRAMP1, PMIT1, ATNRAMP1 | NRAMP1 (NATURAL RESISTANCE-ASSOCIATED MACROPHAGE PROTEIN 1); inorganic anion transmembrane transporter/ manganese ion transmembrane transporter/ metal ion transmembrane transporter
Bra008508	A02:16054892-16055586	88.5971	515.238	2.53991	89.0393	410.525	2.20496	AT5G45010 (E=6e-011) ATDSS1(V) | ATDSS1(V) (Arabidopsis dss1 homolog on chromosome V)
Bra008676	A10:13343596-13347030	2.16574	9.98418	2.20479	0.083233	0.267218	1.68279	AT5G15780 (E=2e-080) | pollen Ole e 1 allergen and extensin family protein
Bra008761	A10:13741696-13743770	4.52769	19.6383	2.11682	5.88578	16.9974	1.53001	AT5G14390 (E=1e-182) | FUNCTIONS IN: molecular_function unknown; INVOLVED IN: biological_process unknown; LOCATED IN: endomembrane system; EXPRESSED IN: 19 plant structures; EXPRESSED DURING: 11 growth stages; CONTAINS InterPro DOMAIN/s: Alpha/beta hydrolase fold-1 (InterPro:IPR000073); BEST Arabidopsis thaliana protein match is: unknown protein (TAIR:AT3G01690.1); Has 2904 Blast hits to 2898 pro…
Bra009663	A06:16436261-16437372	0.391173	1.43967	1.87986	0.254046	15.1604	5.89908	AT5G66070 (E=9e-094) | zinc finger (C3HC4-type RING finger) family protein
Bra009686	A06:16551004-16554484	3.91639	27.1081	2.79113	1.41216	39.1815	4.7942	AT5G23450 (E=0.0) ATLCBK1 | ATLCBK1 (A. THALIANA LONG-CHAIN BASE (LCB) KINASE 1); D-erythro-sphingosine kinase/ diacylglycerol kinase
Bra009710	A06:16685146-16687205	3.44154	79.5987	4.53162	1.76522	6.7093	1.92631	AT5G23860 (E=1e-247) TUB8 | TUB8; structural constituent of cytoskeleton
Bra009864	A06:17766099-17767344	2.35873	10.3292	2.13065	1.09058	17.8705	4.03441	AT5G25830 (E=2e-114) | zinc finger (GATA type) family protein
Bra010065	A06:19104999-19106574	1.63912	27.4385	4.06521	1.81174	5.37774	1.56962	AT5G62220 (E=3e-227) | exostosin family protein
Bra010075	A06:19207036-19207651	33.3324	281.358	3.07741	7.90006	673.795	6.4143	AT5G62350 (E=2e-089) | invertase/pectin methylesterase inhibitor family protein / DC 1.2 homolog (FL5-2I22)
Bra010102	A06:19424743-19426693	1.94979	13.7799	2.82118	1.82537	17.9608	3.29859	AT5G62620 (E=2e-271) | galactosyltransferase family protein
Bra010320	A08:13868685-13870035	0.501892	11.5972	4.53025	0.0306995	8.87996	8.17619	AT4G29700 (E=2e-204) | type I phosphodiesterase/nucleotide pyrophosphatase family protein
Bra010760	A08:16288891-16289868	54.5778	382.939	2.81073	97.887	321.127	1.71396	AT3G23390 (E=5e-047) | 60S ribosomal protein L36a/L44 (RPL36aA)
Bra010807	A08:16558963-16559767	920.462	2639.17	1.51965	134.088	5965.77	5.47546	AT1G29920 (E=1e-149) CAB2, AB165, LHCB1.1 | CAB2 (CHLOROPHYLL A/B-BINDING PROTEIN 2); chlorophyll binding
Bra010817	A08:16610868-16619432	0.192115	3.95366	4.36315	0.172231	1.3726	2.9945	AT1G29720 (E=2e-241) | protein kinase family protein
Bra010967	A08:17315805-17317074	1.71944	28.5166	4.05179	0.392893	17.2973	5.46026	AT1G24530 (E=8e-192) | transducin family protein / WD-40 repeat family protein
Bra011387	A01:2401712-2404649	0.114986	0.507227	2.14117	0.251033	1.329	2.4044	AT4G32840 (E=2e-254) PFK6 | PFK6 (PHOSPHOFRUCTOKINASE 6); 6-phosphofructokinase
Bra011584	A01:1556055-1558496	0.177736	5.22637	4.878	0.126695	0.488886	1.94814	AT4G35090 (E=1e-290) CAT2 | CAT2 (CATALASE 2); catalase
Bra011645	A01:1285203-1286616	19.1656	118.903	2.63319	23.1172	113.372	2.29402	AT4G35860 (E=1e-107) ATRABB1B, ATGB2, ATRAB2C | ATGB2 (GTP-BINDING 2); GTP binding
Bra011671	A01:1140659-1142548	2.43609	29.0928	3.57802	1.14702	8.429	2.87747	AT4G36220 (E=3e-208) FAH1, CYP84A1 | FAH1 (FERULIC ACID 5-HYDROXYLASE 1); ferulate 5-hydroxylase/ monooxygenase
Bra011696	A01:1011837-1013062	0.15089	10.4655	6.116	0.139161	1.78462	3.68079	AT4G36640 (E=3e-143) | SEC14 cytosolic factor family protein / phosphoglyceride transfer family protein
Bra011784	A01:552921-554685	0.305519	55.4051	7.50261	0.159831	34.0021	7.73293	AT4G37770 (E=8e-255) ACS8 | ACS8; 1-aminocyclopropane-1-carboxylate synthase
Bra011899	A01:19282-20267	2.8216	26.6144	3.23762	1.90205	25.1753	3.72639	AT4G38400 (E=6e-109) ATEXLA2, EXPL2, ATEXPL2, ATHEXP BETA 2.2 | ATEXLA2 (ARABIDOPSIS THALIANA EXPANSIN-LIKE A2)
Bra011900	A01:14266-17822	0.288544	7.67123	4.7326	0.233411	1.74799	2.90475	AT4G38190 (E=0.0) ATCSLD4, CSLD4 | ATCSLD4; cellulose synthase/ transferase, transferring glycosyl groups
Bra011901	A01:10564-11413	0.413956	29.6974	6.16471	0.30135	18.0146	5.90158	AT4G38210 (E=5e-126) ATEXPA20, EXP20, ATEXP20, ATHEXP ALPHA 1.23 | ATEXPA20 (ARABIDOPSIS THALIANA EXPANSIN A20)
Bra012083	A07:10127951-10129408	435.386	6297.23	3.85435	261.641	6476.58	4.62957	AT5G66570 (E=2e-184) PSBO-1, OEE1, OEE33, OE33, PSBO1, MSP-1 | PSBO1 (PS II OXYGEN-EVOLVING COMPLEX 1); oxygen evolving/ poly(U) binding
Bra012093	A07:10055497-10056944	0.452905	10.0011	4.4648	0.168057	41.9093	7.96218	AT5G66700 (E=4e-092) HB53, HB-8, ATHB53 | HB53; DNA binding / transcription factor
Bra012504	A07:7131964-7133221	2.85293	8.66009	1.60194	2.57355	9.72801	1.91839	AT1G24530 (E=9e-164) | transducin family protein / WD-40 repeat family protein
Bra012576	A03:23447324-23448182	0.451379	9.20184	4.34951	0.090303	3.46239	5.26085	AT4G18800 (E=6e-109) ATHSGBP, ATRAB11B, ATRABA1D | ATRABA1D (ARABIDOPSIS RAB GTPASE HOMOLOG A1D); GTP binding
Bra012604	A03:23251869-23253847	0.0839311	3.08574	5.20027	0.0179882	5.77828	8.32744	AT4G18340 (E=8e-194) | glycosyl hydrolase family 17 protein
Bra012607	A03:23242034-23244619	0.673931	1.98313	1.55711	0.0290195	4.83683	7.3809	AT4G18260 (E=2e-114) | cytochrome B561-related
Bra012786	A03:22277932-22279196	9.29279	120.665	3.69875	24.4931	396.17	4.01567	AT4G15470 (E=3e-130) | EXPRESSED IN: 24 plant structures; EXPRESSED DURING: 15 growth stages; CONTAINS InterPro DOMAIN/s: Uncharacterised protein family UPF0005 (InterPro:IPR006214); BEST Arabidopsis thaliana protein match is: glutamate binding (TAIR:AT1G03070.1); Has 4000 Blast hits to 3999 proteins in 955 species: Archae - 0; Bacteria - 1775; Metazoa - 750; Fungi - 92; Plants - 143; Viruses - 7…
Bra012803	A03:22146465-22147737	0.116001	1.13721	3.29329	0.0165646	0.212899	3.68399	AT3G52450 (E=3e-130) PUB22 | PUB22 (PLANT U-BOX 22); ubiquitin-protein ligase
Bra012891	A03:21700499-21701475	8.13825	40.9969	2.33272	3.19901	69.5853	4.44309	AT3G50750 (E=1e-111) | brassinosteroid signalling positive regulator-related
Bra012943	A03:21399803-21402718	3.53602	24.9383	2.81817	1.35278	16.4025	3.59992	AT5G61560 (E=0.0) | protein kinase family protein
Bra013131	A03:20291077-20295793	0.00753565	3.65572	8.92221	0.0289706	2.60999	6.49331	AT2G14050 (E=0.0) MCM9 | MCM9; ATP binding / DNA binding / DNA-dependent ATPase/ nucleoside-triphosphatase/ nucleotide binding
Bra013321	A01:4980886-4982723	0.0093338	2.47009	8.04789	0.0119727	0.30804	4.6853	AT4G18540 (E=3e-080) | unknown protein
Bra013513	A01:6063910-6065525	17.0937	115.267	2.75344	24.9645	214.693	3.10433	AT4G21210 (E=4e-176) ATRP1 | ATRP1 (PPDK REGULATORY PROTEIN); phosphoprotein phosphatase/ protein kinase
Bra013522	A01:6104507-6108190	0.050906	3.74137	6.19959	0.0289644	0.466194	4.00857	AT4G21380 (E=0.0) ARK3 | ARK3 (A. THALIANA RECEPTOR KINASE 3); kinase/ transmembrane receptor protein serine/threonine kinase
Bra013734	A01:7490253-7493204	0.424188	41.1673	6.60065	0.0311387	2.00147	6.0062	AT4G23820 (E=2e-241) | glycoside hydrolase family 28 protein / polygalacturonase (pectinase) family protein
Bra013739	A01:7513376-7513933	3.94325	34.5478	3.13114	9.95193	162.792	4.03191	AT4G23880 (E=2e-043) | unknown protein
Bra013790	A01:7760215-7760878	0.366992	5.89412	4.00545	1.60406	9.42267	2.55441	AT4G24310 (E=6e-088) | unknown protein
Bra013804	A01:7834090-7836562	0.315549	7.79541	4.62669	0.097314	1.66777	4.09913	AT4G24460 (E=1e-167) | unknown protein
Bra013825	A01:7963404-7967339	13.415	57.3529	2.09601	13.5516	50.386	1.89456	AT4G24690 (E=3e-301) | ubiquitin-associated (UBA)/TS-N domain-containing protein / octicosapeptide/Phox/Bemp1 (PB1) domain-containing protein
Bra013922	A01:8457482-8458967	0.153214	15.4573	6.65659	0.282658	9.78629	5.11363	AT4G25810 (E=4e-147) XTR6, XTH23 | XTR6 (XYLOGLUCAN ENDOTRANSGLYCOSYLASE 6); hydrolase, acting on glycosyl bonds / hydrolase, hydrolyzing O-glycosyl compounds / xyloglucan:xyloglucosyl transferase
Bra014028	A08:4417658-4419193	0.980182	12.37	3.65766	0.136588	0.58185	2.09082	AT1G44760 (E=3e-108) | universal stress protein (USP) family protein
Bra014056	A08:3966386-3966854	5.4281	89.969	4.05091	10.8683	42.1211	1.95441	AT1G46768 (E=1e-050) RAP2.1 | RAP2.1 (related to AP2 1); DNA binding / transcription factor
Bra014060	A08:3920974-3923056	5.51222	34.8213	2.65927	4.94523	66.8126	3.75601	AT5G50380 (E=8e-224) ATEXO70F1 | ATEXO70F1 (exocyst subunit EXO70 family protein F1); protein binding
Bra014080	A08:3734089-3737342	0.653591	15.2703	4.54619	1.53694	17.8132	3.53482	AT1G47480 (E=4e-160) | hydrolase
Bra014206	A08:2534916-2536453	2.82163	57.4292	4.34719	1.4374	14.5159	3.3361	AT1G49780 (E=8e-189) PUB26 | PUB26 (PLANT U-BOX 26); binding / ubiquitin-protein ligase
Bra014433	A04:610445-611668	516.778	7596.16	3.87765	204.199	9474.41	5.53599	AT3G61470 (E=4e-132) LHCA2 | LHCA2; chlorophyll binding
Bra014903	A07:5379398-5380364	4.43516	16.4473	1.89079	8.81656	29.9061	1.76215	AT1G31130 (E=8e-133) | unknown protein
Bra014975	A07:4654373-4655413	3.56026	44.4911	3.64346	0.52612	5.68189	3.43291	AT3G23730 (E=5e-159) | xyloglucan:xyloglucosyl transferase, putative / xyloglucan endotransglycosylase, putative / endo-xyloglucan transferase, putative
Bra014984	A07:4585666-4587899	1.24828	35.4313	4.82701	0.543456	14.6937	4.75689	AT3G23810 (E=4e-271) SAHH2, ATSAHH2 | SAHH2 (S-ADENOSYL-L-HOMOCYSTEINE (SAH) HYDROLASE 2); adenosylhomocysteinase/ binding / catalytic
Bra015052	A07:3933545-3935494	7.75514	29.9143	1.94761	10.195	66.271	2.70052	AT3G24530 (E=2e-260) | AAA-type ATPase family protein / ankyrin repeat family protein
Bra015073	A07:3744230-3745678	33.4512	192.206	2.52253	34.997	155.338	2.15011	AT3G25530 (E=3e-140) GHBDH, ATGHBDH, GLYR1, GR1 | GLYR1 (GLYOXYLATE REDUCTASE 1); 3-hydroxybutyrate dehydrogenase/ phosphogluconate dehydrogenase (decarboxylating)
Bra015104	A07:3466082-3467879	2.86153	63.8936	4.48081	4.42667	32.7545	2.8874	AT3G25140 (E=6e-297) GAUT8, QUA1 | QUA1 (QUASIMODO 1); polygalacturonate 4-alpha-galacturonosyltransferase/ transferase, transferring glycosyl groups / transferase, transferring hexosyl groups
Bra015166	A07:2810950-2812837	5.19525	49.8838	3.26331	0.661321	4.99112	2.91594	AT2G05790 (E=7e-251) | glycosyl hydrolase family 17 protein
Bra015174	A07:2700562-2702211	3.21413	55.6822	4.11472	4.77351	38.2122	3.00091	AT2G05940 (E=1e-225) | protein kinase, putative
Bra015297	A10:2609840-2610563	2.63641	26.1096	3.30793	0.178364	2.27332	3.6719	AT1G04240 (E=3e-090) SHY2, IAA3 | SHY2 (SHORT HYPOCOTYL 2); transcription factor
Bra015371	A10:2234299-2236553	5.26214	23.806	2.17761	5.39492	16.6177	1.62305	AT1G04970 (E=2e-247) | lipid-binding serum glycoprotein family protein
Bra015696	A07:21316646-21317942	11.583	281.017	4.60057	12.6259	112.539	3.15597	AT1G77090 (E=2e-116) | thylakoid lumenal 29.8 kDa protein
Bra015752	A07:21021178-21022387	0.740894	20.1495	4.76533	1.95028	36.2237	4.21518	AT1G76405 (E=5e-089) | unknown protein
Bra015925	A07:20191123-20193328	1.83094	14.0499	2.9399	2.02898	5.79058	1.51295	AT1G74240 (E=1e-163) | mitochondrial substrate carrier family protein
Bra016176	A07:19028550-19029665	9.99934	29.7644	1.57368	9.09862	27.9567	1.61947	AT1G70900 (E=2e-128) | unknown protein
Bra016189	A07:18983508-18984395	9.20778	320.678	5.12213	3.03148	259.687	6.42061	AT1G70760 (E=5e-088) CRR23 | CRR23 ((chlororespiratory reduction 23)
Bra016373	A08:18110103-18114764	3.8273	50.5161	3.72235	3.21904	45.2304	3.81259	AT1G22620 (E=0.0) ATSAC1 | ATSAC1 (suppressor of actin 1); phosphatidylinositol-4,5-bisphosphate 5-phosphatase
Bra017355	A09:14515039-14515525	9.47868	87.6185	3.20848	14.3891	67.4503	2.22885	AT3G25600 (E=9e-083) | calcium ion binding
Bra017561	A09:16498922-16502686	0.223622	6.57893	4.87872	0.168163	0.61662	1.87452	AT5G46350 (E=1e-108) WRKY8, ATWRKY8 | WRKY8; transcription factor
Bra017684	A03:29754509-29756813	6.16677	23.6841	1.94133	4.71747	36.565	2.95438	AT4G34980 (E=0.0) SLP2 | SLP2; serine-type peptidase
Bra017831	A03:30772547-30773423	0.152495	12.1214	6.31265	0.11871	3.544	4.89986	AT4G37540 (E=1e-074) LBD39 | LBD39 (LOB DOMAIN-CONTAINING PROTEIN 39)
Bra017909	A06:8789588-8793565	1.55563	5.95374	1.9363	2.67179	8.64591	1.69421	AT1G21370 (E=2e-163) | unknown protein
Bra018307	A05:7340694-7341003	1.87365	80.3191	5.42182	3.53028	120.03	5.08747	AT2G30540 (E=6e-053) | glutaredoxin family protein
Bra018417	A05:8112232-8114227	9.69025	273.071	4.8166	11.3021	192.527	4.0904	AT1G10940 (E=6e-179) ASK1, SNRK2-4, SNRK2.4, SRK2A | SNRK2.4 (SNF1-RELATED PROTEIN KINASE 2.4); kinase
Bra018740	A06:2240712-2243573	0.0671799	13.8292	7.68547	0.115012	3.69712	5.00654	AT1G48600 (E=1e-259) | phosphoethanolamine N-methyltransferase 2, putative (NMT2)
Bra018781	A06:2014205-2015353	0.458206	9.27752	4.33967	1.82117	8.72775	2.26074	AT1G49230 (E=4e-084) | zinc finger (C3HC4-type RING finger) family protein
Bra018861	A06:1566663-1569279	1.01805	8.55425	3.07083	0.825176	3.60264	2.12628	AT1G50630 (E=1e-196) | unknown protein
Bra018892	A06:1404997-1405633	28.0305	82.4391	1.55633	21.2958	87.1172	2.03239	AT1G51100 (E=4e-075) | unknown protein
Bra018909	A06:1319881-1321438	0.590787	25.617	5.43832	0.565357	7.27165	3.68505	AT1G51440 (E=6e-251) | lipase class 3 family protein
Bra019002	A06:802674-803825	25.031	133.456	2.41457	17.2671	13460	9.60644	AT3G15450 (E=4e-123) | unknown protein
Bra019074	A03:26451388-26454368	0.209459	1.0263	2.29271	0.141536	1.2469	3.1391	AT1G67000 (E=1e-192) | ATP binding / kinase/ protein kinase/ protein serine/threonine kinase
Bra019437	A06:13733788-13734340	22.2105	89.2178	2.00609	34.115	234.942	2.78383	AT3G44380 (E=2e-081) | FUNCTIONS IN: molecular_function unknown; INVOLVED IN: biological_process unknown; LOCATED IN: cellular_component unknown; EXPRESSED IN: 19 plant structures; EXPRESSED DURING: 13 growth stages; CONTAINS InterPro DOMAIN/s: Water Stress and Hypersensitive response (InterPro:IPR013990), Harpin-induced 1 (InterPro:IPR010847); BEST Arabidopsis thaliana protein match is: unknown …
Bra019453	A06:13523668-13524468	1.12465	102.736	6.51332	1.19547	83.1878	6.12073	AT3G43810 (E=3e-081) CAM7 | CAM7 (CALMODULIN 7); calcium ion binding
Bra019726	A06:4765949-4767713	3.16744	30.1325	3.24993	1.93196	11.9254	2.6259	AT2G32560 (E=1e-142) | F-box family protein
Bra019815	A06:4267675-4269832	0.241966	6.7417	4.80024	0.0327306	0.210346	2.68405	AT1G13180 (E=1e-234) DIS1, ARP3, ATARP3 | DIS1 (DISTORTED TRICHOMES 1); ATP binding / actin binding / protein binding / structural constituent of cytoskeleton
Bra020391	A02:6529315-6537161	1.06717	56.427	5.72452	2.32431	98.7628	5.40909	AT5G58070 (E=6e-086) ATTIL, TIL | TIL (TEMPERATURE-INDUCED LIPOCALIN); binding / transporter
Bra020393	A02:6529315-6537161	9.0852	975.73	6.74682	34.7582	890.621	4.67939	AT5G58070 (E=9e-099) ATTIL, TIL | TIL (TEMPERATURE-INDUCED LIPOCALIN); binding / transporter
Bra020509	A02:24896146-24898503	0.741942	3.81852	2.36364	0.238313	2.04224	3.09922	AT5G25620 (E=3e-213) YUC6 | YUC6 (YUCCA6); FAD binding / NADP or NADPH binding / flavin-containing monooxygenase/ monooxygenase/ oxidoreductase
Bra020737	A02:23407080-23409263	0.034872	22.0488	9.30441	8.04656	50.6708	2.65471	AT3G30390 (E=6e-206) | amino acid transporter family protein
Bra020772	A02:23192216-23192732	8.71048	121.934	3.80721	1.84852	9.04171	2.29023	AT3G06145 (E=1e-081) | unknown protein
Bra020809	A08:12001620-12003612	22.2478	301.296	3.75944	8.16667	34.8996	2.09539	AT4G35250 (E=8e-204) | vestitone reductase-related
Bra020911	A08:11268333-11274315	0.286099	0.852363	1.57495	0.0296688	0.254798	3.10234	AT4G21710 (E=0.0) NRPB2, EMB1989, RPB2 | NRPB2; DNA binding / DNA-directed RNA polymerase
Bra021058	A08:10146671-10150819	0.119359	0.478439	2.00302	0.0832568	0.536297	2.68739	AT3G42670 (E=0.0) CHR38, CLSY | CHR38 (CHROMATIN REMODELING 38); ATP binding / DNA binding / helicase/ nucleic acid binding
Bra021109	A01:23941436-23945430	0.075949	2.31867	4.93212	0.0299199	0.19262	2.68658	AT3G15430 (E=7e-260) | regulator of chromosome condensation (RCC1) family protein
Bra021473	A01:25083023-25084833	1.07881	13.4987	3.64531	1.09864	4.79167	2.12481	AT3G02230 (E=7e-212) RGP1, ATRGP1 | RGP1 (REVERSIBLY GLYCOSYLATED POLYPEPTIDE 1); cellulose synthase (UDP-forming)
Bra021494	A01:24961723-24964173	0.0166941	1.8407	6.78477	0.0856104	29.0545	8.40676	AT3G13640 (E=4e-313) ATRLI1 | ATRLI1; transporter
Bra021758	A04:14294259-14296167	1.09969	5.54283	2.33352	0.483253	9.45812	4.2907	AT2G31880 (E=1e-252) | leucine-rich repeat transmembrane protein kinase, putative
Bra021992	A02:18261116-18262424	0.534827	24.6909	5.52877	0.19177	4.93007	4.68416	AT5G45820 (E=6e-230) CIPK20, SnRK3.6, PKS18 | CIPK20 (CBL-INTERACTING PROTEIN KINASE 20); kinase/ protein serine/threonine kinase
Bra022421	A05:17800518-17803681	0.643984	20.2874	4.97742	0.696955	8.83007	3.66329	AT3G19420 (E=9e-288) ATPEN2 | ATPEN2 (ARABIDOPSIS THALIANA PTEN 2); phosphatase/ protein tyrosine phosphatase
Bra022433	A05:17724940-17726870	0.418873	3.88986	3.21513	0.0566088	3.6396	6.00661	AT3G19553 (E=8e-231) | amino acid permease family protein
Bra022504	A02:9381722-9387751	7.71657	175.067	4.5038	7.27063	69.1149	3.24884	AT5G49810 (E=0.0) MMT | MMT; S-adenosylmethionine-dependent methyltransferase
Bra022565	A02:8895863-8897263	0.0598835	5.2842	6.46338	0.288924	2.22688	2.94626	AT5G51810 (E=7e-203) GA20OX2, AT2353, ATGA20OX2 | GA20OX2 (GIBBERELLIN 20 OXIDASE 2); gibberellin 20-oxidase
Bra022701	A02:7926922-7928448	1.49844	18.0385	3.58955	0.175994	6.76893	5.26533	AT5G54240 (E=9e-140) | unknown protein
Bra022751	A03:6814794-6818353	128.266	1139.79	3.15155	239.546	995.719	2.05544	AT5G50920 (E=0.0) CLPC, ATHSP93-V, HSP93-V, DCA1, CLPC1 | CLPC1; ATP binding / ATP-dependent peptidase/ ATPase
Bra022965	A03:7989263-7992016	0.944865	5.21095	2.46337	0.588773	2.68388	2.18854	AT2G34070 (E=9e-187) | unknown protein
Bra022976	A03:8043726-8045094	542.78	8419.02	3.95521	639.891	5138.03	3.00532	AT2G34430 (E=4e-150) LHB1B1, LHCB1.4 | LHB1B1; chlorophyll binding
Bra023050	A03:8408259-8408964	0.0300689	29.2115	9.92405	0.0780059	7.98534	6.67763	AT2G36120 (E=7e-012) DOT1 | DOT1 (DEFECTIVELY ORGANIZED TRIBUTARIES 1)
Bra023176	A09:20977220-20978392	696.352	5176.51	2.89409	425.683	4694.15	3.46301	AT1G31330 (E=2e-100) PSAF | PSAF (photosystem I subunit F)
Bra023293	A09:19847280-19848922	0.251741	1.16904	2.21532	0.102187	3.72088	5.18636	AT1G32860 (E=4e-180) | glycosyl hydrolase family 17 protein
Bra023530	A02:3804853-3806694	0.462702	23.442	5.66287	0.242818	9.06899	5.223	AT5G15650 (E=4e-111) RGP2, ATRGP2 | RGP2 (REVERSIBLY GLYCOSYLATED POLYPEPTIDE 2); transferase, transferring hexosyl groups
Bra023564	A02:3948048-3949097	28.6497	407.382	3.82979	17.4673	194.167	3.47457	AT5G16400 (E=9e-088) TRXF2, ATF2 | ATF2; enzyme activator
Bra023688	A02:4540354-4540663	6.87006	26.773	1.96239	1.32385	287.028	7.7603	AT5G18600 (E=3e-051) | glutaredoxin family protein
Bra023693	A02:4568374-4569117	5.64165	33.2724	2.56014	3.23854	25.9297	3.00119	AT5G18800 (E=1e-060) | NADH-ubiquinone oxidoreductase 19 kDa subunit (NDUFA8) family protein
Bra023746	A01:19554433-19555066	0.0361952	12.7908	8.46509	0.329739	16.8507	5.67534	AT3G23240 (E=8e-076) ERF1, ATERF1 | ERF1 (ETHYLENE RESPONSE FACTOR 1); DNA binding / transcription activator/ transcription factor
Bra023907	A01:20954505-20960062	1.2554	5.23851	2.06101	1.51461	8.49375	2.48745	AT3G21070 (E=7e-246) NADK1 | NADK1 (NAD KINASE 1); NAD+ kinase/ NADH kinase/ calmodulin binding
Bra024030	A03:28101498-28107692	0.0366717	13.4811	8.52205	0.0314083	0.403748	3.68424	AT4G27130 (E=2e-039) | eukaryotic translation initiation factor SUI1, putative
Bra024089	A03:27710106-27711220	116.773	1056.88	3.17802	73.9052	1170.15	3.98488	AT5G57560 (E=1e-121) TCH4, XTH22 | TCH4 (Touch 4); hydrolase, acting on glycosyl bonds / xyloglucan:xyloglucosyl transferase
Bra024261	A06:14594330-14595030	681.894	5097.47	2.90216	468.167	7470.6	3.99613	AT5G64040 (E=6e-064) PSAN | PSAN; calmodulin binding
Bra024360	A06:15195045-15197249	0.00863442	1.52328	7.46287	0.0110714	0.284902	4.68556	AT5G65160 (E=8e-271) | tetratricopeptide repeat (TPR)-containing protein
Bra024392	A06:15465473-15468946	14.5256	70.3013	2.27495	38.0157	217.977	2.5195	AT5G65495 (E=8e-016) | unknown protein
Bra024405	A06:15566843-15567691	1.45246	9.86875	2.76437	4.83345	56.7899	3.55451	AT5G65660 (E=1e-044) | hydroxyproline-rich glycoprotein family protein
Bra024521	A09:24662740-24663229	3.23653	67.4729	4.38179	6.60508	98.1701	3.89364	AT1G22590 (E=6e-058) AGL87 | MADS-box family protein
Bra024532	A09:24577596-24579672	15.5863	102.22	2.71332	10.5409	152.495	3.85469	AT1G22710 (E=2e-284) SUC2, SUT1, ATSUC2 | SUC2 (SUCROSE-PROTON SYMPORTER 2); carbohydrate transmembrane transporter/ sucrose transmembrane transporter/ sucrose:hydrogen symporter/ sugar:hydrogen symporter
Bra024564	A09:24369922-24370737	3.18112	272.733	6.42181	2.92201	827.616	8.14586	AT1G70840 (E=2e-062) MLP31 | MLP31 (MLP-LIKE PROTEIN 31)
Bra024800	A06:23494167-23495900	2.43321	7.57994	1.63932	0.0730372	7.17377	6.61796	AT2G02950 (E=7e-068) PKS1 | PKS1 (PHYTOCHROME KINASE SUBSTRATE 1); protein binding
Bra025196	A06:22832258-22833835	8.27476	57.4292	2.795	6.22828	28.1026	2.1738	AT3G26310 (E=5e-155) CYP71B35 | CYP71B35; electron carrier/ heme binding / iron ion binding / monooxygenase/ oxygen binding
Bra025211	A06:22737051-22741016	3.4819	10.1074	1.53747	2.98247	8.85609	1.57016	AT3G26560 (E=0.0) | ATP-dependent RNA helicase, putative
Bra025261	A06:22527660-22528506	2.07767	5.98094	1.52541	0.671027	13.8398	4.3663	AT3G27250 (E=5e-128) | unknown protein
Bra025372	A06:21899975-21902070	0.366662	4.62504	3.65695	0.0339005	9.98724	8.20263	AT3G29030 (E=1e-108) ATEXPA5, ATEXP5, ATHEXP ALPHA 1.4, EXP5, EXPA5 | EXPA5 (EXPANSIN A5)
Bra025457	A04:8630979-8634375	0.646013	6.87843	3.41244	0.400427	1.83887	2.19921	AT5G41900 (E=6e-234) | hydrolase, alpha/beta fold family protein
Bra025589	A04:7664506-7667255	0.0785704	5.78131	6.20127	0.135602	1.73691	3.67907	AT5G40330 (E=3e-068) MYB23, ATMYB23, ATMYBRTF | MYB23 (MYB DOMAIN PROTEIN 23); DNA binding / protein binding / transcription factor
Bra025768	A06:7778641-7779917	0.151195	0.741282	2.29361	0.0865422	0.555593	2.68255	AT1G19790 (E=2e-119) SRS7 | SRS7 (SHI-RELATED SEQUENCE 7)
Bra025812	A06:8159871-8160279	283.079	3367.08	3.57222	61.1428	1894.53	4.95351	AT1G20340 (E=5e-050) DRT112, PETE2 | DRT112; copper ion binding / electron carrier
Bra025816	A06:8195490-8198807	0.206909	0.58869	1.50851	0.256481	2.20111	3.10131	AT1G20380 (E=0.0) | prolyl oligopeptidase, putative / prolyl endopeptidase, putative / post-proline cleaving enzyme, putative
Bra026264	A01:10311627-10312371	0.468242	4.86444	3.37695	0.0356786	2.28422	6.0005	AT5G39320 (E=7e-135) | UDP-glucose 6-dehydrogenase, putative
Bra026276	A01:10250294-10251706	0.876503	3.74526	2.09524	0.183198	1.87624	3.35637	AT4G28190 (E=7e-132) ULT1, ULT | ULT1 (ULTRAPETALA1); DNA binding
Bra026325	A01:10002384-10004307	40.201	132.879	1.72481	29.0208	126.387	2.12268	AT1G54520 (E=9e-136) | unknown protein
Bra026356	A01:9822817-9823336	51.346	309.637	2.59225	0.465911	76.8055	7.36501	AT4G27360 (E=6e-048) | dynein light chain, putative
Bra026365	A01:9771540-9774038	0.0820253	2.8941	5.1409	0.0105152	0.676547	6.00764	AT4G27260 (E=0.0) GH3.5, WES1 | WES1; indole-3-acetic acid amido synthetase
Bra026620	A02:20777053-20779372	0.249163	5.71487	4.51956	0.191829	0.65796	1.77818	AT2G02020 (E=3e-143) | proton-dependent oligopeptide transport (POT) family protein
Bra026640	A02:21018349-21019470	2.63815	13.6972	2.37628	2.12647	38.8414	4.19106	AT5G09900 (E=2e-143) EMB2107, RPN5A, MSA | EMB2107 (EMBRYO DEFECTIVE 2107)
Bra027021	A09:7681248-7683830	64.4857	190.832	1.56525	32.0125	149.43	2.22276	AT1G62750 (E=0.0) ATSCO1, ATSCO1/CPEF-G, SCO1 | SCO1 (SNOWY COTYLEDON 1); ATP binding / translation elongation factor/ translation factor, nucleic acid binding
Bra027083	A09:8322786-8323798	600.692	5988.53	3.3175	582.461	10455	4.16588	AT1G61520 (E=5e-132) LHCA3 | LHCA3; chlorophyll binding
Bra027098	A09:8449661-8454838	0.0324579	2.57648	6.31069	0.00831424	0.642204	6.2713	AT1G61120 (E=0.0) TPS04, GES | TPS04 (TERPENE SYNTHASE 04); (E,E)-geranyllinalool synthase
Bra027109	A09:8531429-8531876	616.97	9717.73	3.97735	595.185	5489.93	3.20538	AT1G60950 (E=1e-055) FED A, ATFD2 | FED A; 2 iron, 2 sulfur cluster binding / electron carrier/ iron-sulfur cluster binding
Bra027198	A05:19640614-19645270	0.00647187	1.99784	8.27004	0.0165778	1.49392	6.4937	AT3G15950 (E=7e-264) NAI2 | NAI2
Bra027713	A09:6734627-6736580	0.46621	8.10275	4.11936	0.0363367	1.63406	5.49089	AT1G64670 (E=8e-210) BDG1 | BDG1 (BODYGUARD1); hydrolase
Bra027908	A09:9741360-9744957	3.76359	23.2772	2.62873	3.30825	14.9723	2.17815	AT1G57770 (E=1e-288) | amine oxidase family
Bra028112	A04:5802411-5803249	1.77334	14.2519	3.00661	3.32968	9.49933	1.51244	AT1G65820 (E=3e-062) | microsomal glutathione s-transferase, putative
Bra028124	A04:5936517-5938980	10.9233	157.311	3.84815	11.61	70.7521	2.6074	AT5G37510 (E=0.0) EMB1467 | EMB1467 (embryo defective 1467); NADH dehydrogenase (ubiquinone)/ NADH dehydrogenase/ electron carrier/ iron-sulfur cluster binding / oxidoreductase/ oxidoreductase, acting on NADH or NADPH
Bra028181	A04:6422699-6424008	4376.66	25489.3	2.54199	1830.35	12176.1	2.73386	AT5G38430 (E=1e-089) | ribulose bisphosphate carboxylase small chain 1B / RuBisCO small subunit 1B (RBCS-1B) (ATS1B)
Bra028211	A04:6718424-6719483	1.92962	21.2884	3.46368	0.15345	2.14873	3.80764	None
Bra028219	A04:6779494-6782152	3.77534	48.616	3.68675	6.6154	50.5277	2.93317	AT5G39000 (E=0.0) | protein kinase family protein
Bra028271	A01:19105517-19106424	217.541	640.43	1.55775	85.123	340.377	1.99951	AT5G51720 (E=8e-050) | unknown protein
Bra028274	A01:19082052-19084380	1.82336	11.2902	2.6304	1.71127	5.25051	1.61739	AT5G51750 (E=0.0) ATSBT1.3, SBT1.3 | ATSBT1.3 (ARABIDOPSIS THALIANA SUBTILASE 1.3); identical protein binding / serine-type endopeptidase
Bra028312	A01:18686782-18688147	3.05223	8.83751	1.53378	2.51263	12.6488	2.33173	AT5G52510 (E=1e-181) | scarecrow-like transcription factor 8 (SCL8)
Bra028437	A02:312739-314235	0.567939	4.88903	3.10574	0.391854	1.83096	2.22421	AT5G39660 (E=2e-118) CDF2 | CDF2 (CYCLING DOF FACTOR 2); DNA binding / protein binding / transcription factor
Bra028448	A02:388931-390959	4.51387	13.5509	1.58595	2.46538	11.2207	2.18628	AT5G39980 (E=0.0) | pentatricopeptide (PPR) repeat-containing protein
Bra028454	A02:416955-417656	0.596302	4.39159	2.88063	0.846889	22.394	4.72479	AT3G01470 (E=7e-035) ATHB-1, ATHB1, HD-ZIP-1, HAT5 | ATHB-1 (ARABIDOPSIS THALIANA HOMEOBOX 1); DNA binding / protein homodimerization/ sequence-specific DNA binding / transcription activator/ transcription factor
Bra028503	A02:759521-759824	0.694809	207.421	8.22173	4.92584	739.096	7.22925	AT5G41761 (E=4e-035) | unknown protein
Bra028915	A02:1423415-1423874	21.229	97.6114	2.20101	17.8552	189.025	3.40416	AT5G01880 (E=1e-058) | zinc finger (C3HC4-type RING finger) family protein
Bra029455	A09:17929631-17930468	0.481908	12.1553	4.65668	0.29652	3.42113	3.52827	AT4G12450 (E=3e-118) | unknown protein
Bra029563	A09:16980584-16981997	1506.38	7253.39	2.26757	732.798	5759.22	2.97439	AT4G05180 (E=6e-086) PSBQ, PSBQ-2, PSII-Q | PSBQ-2; calcium ion binding
Bra029833	A05:22077023-22080062	3.06244	13.96	2.18855	3.51956	12.7917	1.86174	AT3G10370 (E=0.0) SDP6 | SDP6 (SUGAR-DEPENDENT 6); glycerol-3-phosphate dehydrogenase
Bra029925	A01:14939542-14940748	1.97445	23.1476	3.55134	0.159781	3.65001	4.51373	AT4G12730 (E=3e-177) FLA2 | FLA2 (FASCICLIN-LIKE ARABINOGALACTAN 2)
Bra029984	A01:15486448-15486889	91.8612	842.868	3.19778	116.731	657.791	2.49444	AT3G49910 (E=4e-060) | 60S ribosomal protein L26 (RPL26A)
Bra030003	A01:15654885-15656079	0.139885	8.64008	5.94873	0.251835	6.00941	4.57667	AT3G50340 (E=8e-165) | unknown protein
Bra030055	A07:6938748-6940592	3.98994	19.9163	2.31951	2.47252	27.6739	3.48447	AT1G27600 (E=1e-167) | glycosyl transferase family 43 protein
Bra030156	A07:6161601-6163129	1.21001	9.83491	3.02289	0.717318	22.1095	4.94591	AT1G29670 (E=3e-175) | GDSL-motif lipase/hydrolase family protein
Bra030162	A07:5993826-6130757	56.8702	460.801	3.0184	113.114	486.059	2.10336	AT1G29720 (E=6e-042) | protein kinase family protein
Bra030722	A08:20657350-20657814	0.340612	201.748	9.21021	0.469724	156.294	8.37823	AT1G08380 (E=5e-057) PSAO | PSAO (photosystem I subunit O)
Bra030833	A08:153761-154238	14.3139	65.8406	2.20156	20.7155	77.0878	1.89579	AT1G55805 (E=3e-049) | BolA-like family protein
Bra030917	A08:768317-770069	3.83856	16.1941	2.07683	1.55468	42.9724	4.78872	AT1G53990 (E=5e-161) GLIP3 | GLIP3; carboxylesterase/ lipase
Bra031040	A09:32806190-32811431	6.77516	27.7514	2.03423	5.27594	29.632	2.48966	AT1G18700 (E=0.0) | DNAJ heat shock N-terminal domain-containing protein
Bra031094	A09:32503691-32504268	72.2039	283.793	1.97469	79.2788	381.27	2.26581	AT2G19740 (E=3e-050) | 60S ribosomal protein L31 (RPL31A)
Bra031096	A09:32501645-32502518	5.62761	221.868	5.30103	2.02443	41.7247	4.36531	AT4G29390 (E=5e-021) | 40S ribosomal protein S30 (RPS30B)
Bra031171	A09:32197493-32197808	6.20928	632.097	6.66958	0.794914	199.023	7.96792	AT2G21220 (E=2e-052) | auxin-responsive protein, putative
Bra031243	A05:16736854-16740790	2.89388	14.2092	2.29575	4.78242	16.5046	1.78706	AT3G20920 (E=7e-180) | translocation protein-related
Bra031315	A05:16081553-16083716	37.2274	210.242	2.49762	14.3201	284.656	4.31311	AT3G21870 (E=2e-089) CYCP2;1 | CYCP2;1 (cyclin p2;1); cyclin-dependent protein kinase
Bra031359	A05:15775432-15776559	0.934561	3.89054	2.05761	0.40895	1.16661	1.51232	AT1G22030 (E=2e-120) | unknown protein
Bra031427	A01:17546439-17547437	746.343	12076.5	4.01622	407.673	8098.22	4.31212	AT1G61520 (E=1e-138) LHCA3 | LHCA3; chlorophyll binding
Bra031534	A09:35944037-35945429	250.258	1823.85	2.8655	62.9357	824.181	3.71101	AT1G06680 (E=1e-120) PSBP-1, OEE2, PSII-P, OE23 | PSBP-1 (PHOTOSYSTEM II SUBUNIT P-1); poly(U) binding
Bra031615	A09:35573712-35574346	0.482835	1.64069	1.7647	0.193446	0.617703	1.67499	AT1G08160 (E=2e-080) | harpin-induced protein-related / HIN1-related / harpin-responsive protein-related
Bra031813	A02:27785461-27786839	420.308	1945.03	2.21027	259.969	1019.63	1.97164	AT5G66570 (E=7e-183) PSBO-1, OEE1, OEE33, OE33, PSBO1, MSP-1 | PSBO1 (PS II OXYGEN-EVOLVING COMPLEX 1); oxygen evolving/ poly(U) binding
Bra032231	A05:12646958-12649455	0.881174	8.39176	3.25147	0.321225	2.47897	2.94808	AT1G47670 (E=2e-278) | amino acid transporter family protein
Bra032349	A09:22369010-22371875	2.08609	16.6251	2.99449	1.09002	4.00217	1.87643	AT1G29980 (E=2e-198) | INVOLVED IN: biological_process unknown; LOCATED IN: plasma membrane, anchored to membrane; EXPRESSED IN: 24 plant structures; EXPRESSED DURING: 13 growth stages; CONTAINS InterPro DOMAIN/s: Protein of unknown function DUF642 (InterPro:IPR006946), Galactose-binding like (InterPro:IPR008979); BEST Arabidopsis thaliana protein match is: unknown protein (TAIR:AT2G34510.1); Has…
Bra032383	A09:21890165-21891752	0.215239	0.863062	2.00353	0.552316	6.13556	3.47363	AT1G30370 (E=9e-273) | lipase class 3 family protein
Bra032568	A09:36631238-36669068	4.08268	317.94	6.2831	3.19095	105.44	5.0463	AT1G01790 (E=7e-147) KEA1, ATKEA1 | KEA1 (K EFFLUX ANTIPORTER 1); potassium ion transmembrane transporter/ potassium:hydrogen antiporter
Bra032579	A09:36704213-36711989	0.00404214	0.534696	7.04745	0.0517031	0.199805	1.95027	AT1G02890 (E=0.0) | AAA-type ATPase family protein
Bra032856	A09:12377210-12381907	0.0929467	0.819653	3.14054	0.0190188	0.061253	1.68735	AT1G27940 (E=0.0) PGP13 | PGP13 (P-GLYCOPROTEIN 13); ATPase, coupled to transmembrane movement of substances
Bra032876	A09:12206682-12209166	0.0495008	2.18318	5.46283	0.0317295	1.08877	5.10073	AT1G28130 (E=0.0) GH3.17 | GH3.17; indole-3-acetic acid amido synthetase
Bra032889	A09:12091885-12093794	0.691039	23.6322	5.09584	0.155784	4.28571	4.78191	AT1G28290 (E=3e-063) AGP31 | AGP31 (arabinogalactan-protein 31)
Bra032985	A02:22087142-22090226	0.0555486	0.816541	3.8777	0.023711	0.30527	3.68646	AT3G27170 (E=0.0) CLC-B, ATCLC-B | CLC-B (CHLORIDE CHANNEL B); anion channel/ voltage-gated chloride channel
Bra033120	A02:16671097-16671958	0.198165	61.2993	8.27302	0.133209	26.8015	7.65248	AT4G12090 (E=1e-057) | cornichon family protein
Bra033283	A10:4501153-4502743	0.429492	33.5823	6.28893	0.475902	10.1488	4.41449	AT1G01120 (E=2e-261) KCS1 | KCS1 (3-KETOACYL-COA SYNTHASE 1); acyltransferase/ fatty acid elongase
Bra033370	A10:4019901-4033414	0.545926	4.23769	2.9565	0.250254	2.53612	3.34116	AT1G03060 (E=0.0) | WD-40 repeat family protein / beige-related
Bra033461	A04:4331866-4332193	23.6509	121.987	2.36676	48.782	486.819	3.31896	AT3G52070 (E=5e-039) | unknown protein
Bra033572	A06:26162971-26163978	0.42257	17.7181	5.38989	0.0818226	4.54749	5.79643	AT4G38620 (E=1e-138) ATMYB4, MYB4 | MYB4; DNA binding / transcription factor
Bra033581	A06:26125541-26125856	16.3699	97.2456	2.57059	1.98728	85.2954	5.4236	AT4G38860 (E=5e-052) | auxin-responsive protein, putative
Bra033613	A06:26014758-26016170	13.3898	42.8521	1.67824	1.06573	3.94813	1.88933	AT4G39330 (E=2e-176) ATCAD9, CAD9 | CAD9 (CINNAMYL ALCOHOL DEHYDROGENASE 9); binding / catalytic/ oxidoreductase/ zinc ion binding
Bra033656	A06:25783132-25784443	1.45068	24.1261	4.05579	0.407073	1.39229	1.7741	AT5G43020 (E=1e-157) | leucine-rich repeat transmembrane protein kinase, putative
Bra033661	A06:25759618-25762092	0.164438	3.74	4.50742	0.0543617	0.419686	2.94865	AT5G43120 (E=5e-272) | tetratricopeptide repeat (TPR)-containing protein
Bra033713	A06:25470995-25472717	30.0956	514.469	4.09546	5.61163	306.354	5.77063	AT5G44020 (E=8e-141) | acid phosphatase class B family protein
Bra033724	A06:25416270-25418581	0.0688061	2.52931	5.20006	0.17672	0.568036	1.68452	AT5G44160 (E=2e-195) NUC | NUC (nutcracker); nucleic acid binding / transcription factor/ zinc ion binding
Bra033940	A02:10763288-10765559	0.428823	7.20983	4.07151	0.131749	5.74621	5.44675	AT1G68400 (E=2e-084) | leucine-rich repeat transmembrane protein kinase, putative
Bra034047	A01:27700419-27702136	0.142758	4.19927	4.87849	0.347104	2.36002	2.76536	AT3G09010 (E=2e-172) | protein kinase family protein
Bra034123	A01:27350121-27350502	2.98196	43.86	3.87857	10.4668	69.5842	2.73295	AT3G10525 (E=4e-039) | FUNCTIONS IN: molecular_function unknown; INVOLVED IN: biological_process unknown; LOCATED IN: cellular_component unknown; EXPRESSED IN: 22 plant structures; EXPRESSED DURING: 13 growth stages; BEST Arabidopsis thaliana protein match is: SIM (SIAMESE); cyclin-dependent protein kinase inhibitor (TAIR:AT5G04470.1); Has 23 Blast hits to 23 proteins in 6 species: Archae - 0; Ba…
Bra034150	A01:27222755-27223827	0.533547	15.3596	4.84738	0.269808	1.92145	2.83219	AT3G10870 (E=2e-123) MES17, ATMES17 | MES17 (METHYL ESTERASE 17); hydrolase/ hydrolase, acting on ester bonds / methyl indole-3-acetate esterase
Bra034446	A05:14103747-14107128	0.212588	1.12486	2.40361	0.0652682	2.10178	5.00909	AT1G34110 (E=0.0) | leucine-rich repeat transmembrane protein kinase, putative
Bra034448	A05:14114649-14116172	0.316091	3.8745	3.6156	0.363494	4.64711	3.67633	AT1G34020 (E=2e-162) | transporter-related
Bra034527	Scaffold000096:913872-914723	0.485256	4.28618	3.14288	0.588199	3.76109	2.67678	AT1G62840 (E=3e-111) | unknown protein
Bra034608	A08:12553849-12557841	1.80458	12.0313	2.73706	3.25611	14.589	2.16366	AT4G34135 (E=5e-233) UGT73B2 | UGT73B2 (UDP-GLUCOSYLTRANSFERASE 73B2); UDP-glucosyltransferase/ UDP-glycosyltransferase/ flavonol 3-O-glucosyltransferase/ quercetin 7-O-glucosyltransferase
Bra034620	A08:12474268-12477298	34.9234	202.24	2.5338	34.792	121.4	1.80294	AT4G34350 (E=7e-251) CLB6, ISPH, HDR | HDR (4-HYDROXY-3-METHYLBUT-2-ENYL DIPHOSPHATE REDUCTASE); 4-hydroxy-3-methylbut-2-en-1-yl diphosphate reductase/ 4-hydroxy-3-methylbut-2-en-1-yl diphosphate synthase
Bra034821	A05:21563593-21566989	25.2615	90.0961	1.83452	28.0359	113.123	2.01254	AT3G11670 (E=0.0) DGD1 | DGD1 (DIGALACTOSYL DIACYLGLYCEROL DEFICIENT 1); UDP-galactosyltransferase/ galactolipid galactosyltransferase/ transferase, transferring glycosyl groups
Bra034898	A08:5521714-5522272	13.8239	211.116	3.9328	7.92048	153.611	4.27755	AT4G12970 (E=4e-038) | unknown protein
Bra034911	A08:5346866-5348614	569.075	3951.36	2.79566	271.647	2505.53	3.20531	AT4G12800 (E=1e-099) PSAL | PSAL (photosystem I subunit L)
Bra034917	A08:5300796-5304783	7.72154	25.4098	1.71843	6.78726	78.4224	3.53036	AT1G43710 (E=2e-251) emb1075 | emb1075 (embryo defective 1075); carboxy-lyase/ catalytic/ pyridoxal phosphate binding
Bra034927	A08:5184265-5186761	344.99	5236.57	3.924	258.806	1183.18	2.19273	AT1G42970 (E=7e-234) GAPB | GAPB (GLYCERALDEHYDE-3-PHOSPHATE DEHYDROGENASE B SUBUNIT); glyceraldehyde-3-phosphate dehydrogenase (NADP+)/ glyceraldehyde-3-phosphate dehydrogenase
Bra034992	Scaffold000100:706827-708938	0.0470608	27.6858	9.20041	0.0201906	23.3386	10.1748	AT3G44160 (E=8e-193) | chloroplast outer membrane protein-related
Bra035051	A07:21963802-21964970	0.02134	2.82563	7.04887	0.0275503	0.35333	3.68087	AT1G78600 (E=3e-107) LZF1, STH3 | LZF1 (LIGHT-REGULATED ZINC FINGER PROTEIN 1); transcription factor/ zinc ion binding
Bra035194	A07:22530091-22531428	0.0997129	32.5648	8.35131	0.874714	69.9733	6.32185	AT1G80130 (E=3e-095) | binding
Bra035232	A08:9386163-9389018	0.441288	5.09798	3.53013	0.296689	4.16242	3.8104	AT4G11350 (E=3e-245) | transferase, transferring glycosyl groups
Bra035280	A08:9831327-9833882	2.97624	26.0839	3.1316	2.64927	15.679	2.56517	AT4G10760 (E=2e-210) EMB1706, MTA | MTA (MRNA ADENOSINE METHYLASE); S-adenosylmethionine-dependent methyltransferase/ methyltransferase
Bra035282	A08:9846254-9849660	0.0170615	0.752492	5.46286	0.0109379	0.281474	4.68559	AT4G10730 (E=6e-160) | ATP binding / kinase/ protein kinase/ protein serine/threonine kinase/ protein tyrosine kinase
Bra035400	Scaffold000104:639530-643182	0.387721	1.68179	2.11691	0.138382	0.419184	1.59893	AT5G35430 (E=0.0) | binding
Bra035404	Scaffold000104:740162-743856	0.105844	2.19653	4.37521	0.167436	2.2583	3.75355	AT5G35430 (E=0.0) | binding
Bra035721	A04:12540029-12541151	15.1119	170.902	3.49941	16.0558	79.4662	2.30724	AT5G51040 (E=3e-090) | unknown protein
Bra035722	A04:12533397-12535192	2.85084	15.2563	2.41995	1.46632	8.47732	2.5314	AT5G51050 (E=9e-267) | mitochondrial substrate carrier family protein
Bra035852	A09:3299293-3301494	13.2955	45.5751	1.7773	0.224212	6.20593	4.79071	AT5G63180 (E=2e-220) | pectate lyase family protein
Bra036001	Scaffold000111:410864-415102	5.92971	139.438	4.55552	2.97641	45.5251	3.93501	AT5G43870 (E=2e-157) | phosphoinositide binding
Bra036135	A09:2561128-2561600	10.2748	58.6887	2.51397	25.0963	221.47	3.14157	AT5G49550 (E=5e-055) | unknown protein
Bra036303	A09:435639-437478	0.0117199	0.516994	5.46312	0.0301051	0.193523	2.68442	AT4G01950 (E=9e-221) ATGPAT3, GPAT3 | GPAT3 (GLYCEROL-3-PHOSPHATE ACYLTRANSFERASE 3); acyltransferase
Bra036343	A02:22728930-22729998	34.6195	185.62	2.42269	31.8986	261.342	3.03437	AT3G26220 (E=2e-133) CYP71B3 | CYP71B3; electron carrier/ heme binding / iron ion binding / monooxygenase/ oxygen binding
Bra036702	A09:5538272-5539060	0.753689	718.113	9.89603	3.24117	1063.87	8.35859	AT2G19790 (E=1e-079) | clathrin adaptor complex small chain family protein
Bra036725	A09:5410326-5410900	5.04353	89.2392	4.14517	10.4631	253.476	4.59847	AT2G19350 (E=4e-052) | unknown protein
Bra036773	A08:7093848-7095463	0.150419	127.293	9.72495	0.263721	93.3058	8.46681	AT1G36320 (E=2e-185) | unknown protein
Bra036932	Scaffold000123:76614-77999	4.71777	25.5766	2.43864	3.06789	48.1829	3.9732	AT1G43860 (E=7e-181) | transcription factor
Bra037137	A09:4303765-4305992	0.893016	25.5605	4.83909	0.207182	0.940636	2.18274	AT5G66920 (E=8e-272) sks17 | sks17 (SKU5 Similar 17); copper ion binding / oxidoreductase
Bra037164	A09:4180896-4182606	423.989	7309.37	4.10765	242.396	4522.02	4.22153	AT5G66570 (E=1e-184) PSBO-1, OEE1, OEE33, OE33, PSBO1, MSP-1 | PSBO1 (PS II OXYGEN-EVOLVING COMPLEX 1); oxygen evolving/ poly(U) binding
Bra037237	A09:4836157-4839899	0.060499	82.3788	10.4111	0.319811	65.6064	7.68047	AT2G18100 (E=6e-261) | unknown protein
Bra037336	A09:1014350-1016206	6.06487	111.592	4.20161	1.95639	18.6883	3.25586	AT4G00360 (E=1e-304) CYP86A2, ATT1 | CYP86A2 (CYTOCHROME P450 86 A2); fatty acid (omega-1)-hydroxylase/ oxygen binding
Bra037353	A09:927021-929198	0.174117	5.28026	4.92248	0.0698527	1.0779	3.94777	AT4G00710 (E=2e-265) BSK3 | BSK3 (BR-SIGNALING KINASE 3); ATP binding / binding / kinase/ protein kinase/ protein tyrosine kinase
Bra037545	A01:21805550-21806669	0.67049	2.68936	2.00397	0.274521	3.27433	3.57621	AT3G18950 (E=4e-185) | transducin family protein / WD-40 repeat family protein
Bra037614	A01:13272246-13273863	0.29876	5.65125	4.24151	0.0551007	4.59329	6.38131	AT3G44990 (E=3e-144) XTR8, ATXTR8 | XTR8 (XYLOGLUCAN ENDO-TRANSGLYCOSYLASE-RELATED 8); hydrolase, acting on glycosyl bonds / xyloglucan:xyloglucosyl transferase
Bra037700	A04:18140254-18144255	0.134078	1.47835	3.46285	0.139666	1.10593	2.98521	AT1G70250 (E=3e-170) | receptor serine/threonine kinase, putative
Bra037750	A09:3392784-3395317	0.102051	0.900267	3.14107	0.130964	4.04252	4.94801	AT5G63680 (E=5e-277) | pyruvate kinase, putative
Bra037793	A09:3605708-3610867	14.5062	109.674	2.91848	9.67237	31.129	1.68632	AT5G64740 (E=0.0) CESA6, IXR2, E112, PRC1 | CESA6 (CELLULOSE SYNTHASE 6); cellulose synthase/ transferase, transferring glycosyl groups
Bra037913	A09:11629369-11630701	2384.92	31518.5	3.72419	1058.85	13086	3.62746	AT4G10340 (E=2e-136) LHCB5 | LHCB5 (LIGHT HARVESTING COMPLEX OF PHOTOSYSTEM II 5); chlorophyll binding
Bra037927	A10:44631-44856	7.32179	1510.82	7.68892	3.50092	2831.99	9.65987	AT5G50335 (E=7e-029) | unknown protein
Bra037993	A06:243381-243561	48.7459	656.523	3.75149	22.6845	1089.64	5.586	AT1G55330 (E=7e-008) AGP21, ATAGP21 | AGP21
Bra037995	A06:205291-214691	2.32867	13.8715	2.57455	0.748497	8.72627	3.5433	AT1G55350 (E=0.0) DEK1, ATDEK1 | DEK1 (DEFECTIVE KERNEL 1); calcium-dependent cysteine-type endopeptidase/ cysteine-type endopeptidase
Bra038381	A09:11100178-11100976	73.8524	1228.45	4.05605	49.0237	202.633	2.04732	AT4G09350 (E=9e-104) | DNAJ heat shock N-terminal domain-containing protein
Bra038614	A06:14192662-14194623	13.7161	82.0882	2.5813	1.1105	65.4289	5.88065	AT5G63180 (E=4e-226) | pectate lyase family protein
Bra038769	A03:24169165-24169567	63.2131	1320.79	4.38504	35.9401	906.278	4.65629	AT4G21620 (E=2e-034) | glycine-rich protein
Bra038810	A03:23927025-23929983	0.504743	1.50053	1.57185	0.392063	2.1502	2.45532	AT4G20270 (E=0.0) BAM3 | BAM3 (BARELY ANY MERISTEM 3); ATP binding / protein binding / protein kinase/ protein serine/threonine kinase
Bra038960	A08:8595465-8597004	0.0710952	2.68793	5.2406	0.0260673	1.84397	6.14443	AT4G13990 (E=3e-253) | exostosin family protein
Bra038962	A08:8618704-8619052	26.664	781.71	4.87367	40.2466	207.018	2.36282	AT4G14020 (E=3e-027) | rapid alkalinization factor (RALF) family protein
Bra039094	A09:1184163-1185446	9.98688	29.7022	1.57246	5.21974	51.2649	3.29592	AT3G27050 (E=6e-090) | unknown protein
Bra039103	A09:1150518-1151742	0.280074	4.36168	3.96101	0.0212138	0.817213	5.26763	AT3G26932 (E=7e-095) DRB3 | DRB3 (dsRNA-binding protein 3); RNA binding / double-stranded RNA binding
Bra039135	A05:23808836-23812598	0.0711414	2.09358	4.87914	0.183925	6.67924	5.18249	AT3G01220 (E=3e-135) ATHB20 | ATHB20 (ARABIDOPSIS THALIANA HOMEOBOX PROTEIN 20); DNA binding / transcription factor
Bra039138	A05:23798797-23801933	6.04878	33.7932	2.48202	3.87714	51.3652	3.72772	AT3G01180 (E=1e-205) AtSS2 | AtSS2 (starch synthase 2); transferase, transferring glycosyl groups
Bra039149	A05:23751824-23754105	0.56101	2.5598	2.18993	0.347466	1.75588	2.33725	AT3G01040 (E=2e-284) GAUT13 | GAUT13 (Galacturonosyltransferase 13); polygalacturonate 4-alpha-galacturonosyltransferase/ transferase, transferring glycosyl groups / transferase, transferring hexosyl groups
Bra039181	A05:23596607-23600105	4.05271	26.9101	2.73119	1.39075	26.9434	4.276	AT3G02570 (E=3e-217) MEE31, PMI1 | MEE31 (MATERNAL EFFECT EMBRYO ARREST 31); mannose-6-phosphate isomerase
Bra039264	A04:18841866-18842226	13.6726	40.5418	1.56812	10.5958	47.0058	2.14935	AT2G46690 (E=4e-050) | auxin-responsive family protein
Bra039631	A07:1620151-1621226	102.344	509.523	2.31571	66.0015	426.043	2.69043	AT2G18160 (E=1e-065) ATBZIP2, GBF5 | ATBZIP2 (ARABIDOPSIS THALIANA BASIC LEUCINE-ZIPPER 2); DNA binding / protein heterodimerization/ transcription factor
Bra039762	A02:9841143-9842610	2.22987	12.3544	2.46999	2.65508	14.0485	2.40359	AT1G66350 (E=6e-231) RGL1, RGL | RGL1 (RGA-LIKE 1); transcription factor
Bra039865	A08:6193416-6195766	10.2001	89.7535	3.13738	15.861	114.851	2.85621	AT1G30580 (E=3e-193) | GTP binding
Bra039904	A07:1744928-1747183	6.0324	83.1167	3.78434	2.1659	14.0823	2.70084	AT2G17972 (E=2e-047) | unknown protein
Bra040094	A01:10700477-10701544	11.0795	63.4475	2.51767	18.5942	138.804	2.90013	AT4G16780 (E=3e-124) ATHB-2, HAT4, ATHB2 | ATHB-2 (ARABIDOPSIS THALIANA HOMEOBOX PROTEIN 2); DNA binding / protein homodimerization/ sequence-specific DNA binding / transcription factor
Bra040313	A04:18532075-18536700	0.978503	8.49342	3.1177	0.165203	2.65198	4.00476	AT2G45400 (E=1e-147) BEN1 | BEN1; binding / catalytic/ coenzyme binding / oxidoreductase, acting on CH-OH group of donors
Bra040547	Scaffold000217:9163-12235	0.461436	4.36055	3.24031	0.388389	2.28253	2.55506	AT3G01680 (E=0.0) | unknown protein
Bra040700	Scaffold000237:10955-13972	0.267785	1.44015	2.42707	0.184038	0.646146	1.81186	AT3G01680 (E=0.0) | unknown protein
Bra040793	Scaffold000259:18721-20436	0.157449	9.72586	5.94887	0.121595	1.3014	3.41991	AT1G47210 (E=4e-170) CYCA3;2 | cyclin family protein
Bra040801	Scaffold000261:20601-22113	20.8514	172.594	3.04917	17.8499	175.771	3.29971	AT4G13510 (E=3e-235) AMT1;1, ATAMT1, ATAMT1;1 | AMT1;1 (AMMONIUM TRANSPORTER 1;1); ammonium transmembrane transporter

## Sheet: Common_Downregulated_DEGs
gene_id	locus	value_T1	value_S1	log2.fold_changeT1VsS1	value_T2	value_S2	log2.fold_change..T2VsS2	description
Bra000001	A03:8774510-8777095	0.24849	0	-Inf	0.0664413	0	-Inf	AT2G37440 (E=7e-179) | endonuclease/exonuclease/phosphatase family protein
Bra000004	A03:8796857-8797232	4.6036	0	-Inf	6.80961	0	-Inf	AT2G37530 (E=2e-034) | unknown protein
Bra000006	A03:8800738-8801050	28.4811	0	-Inf	99.1898	0	-Inf	AT5G59690 (E=8e-040) | histone H4
Bra000008	A03:8809307-8810496	0.148636	0	-Inf	0.0274116	0	-Inf	AT2G37590 (E=3e-076) ATDOF2.4, DOF2.4 | Dof-type zinc finger domain-containing protein
Bra000017	A03:8867863-8868097	27.5444	0	-Inf	5.27972	0	-Inf	AT2G37750 (E=2e-007) | unknown protein
Bra000026	A03:8897178-8899098	0.189269	0	-Inf	0.199478	0	-Inf	AT2G37890 (E=1e-146) | mitochondrial substrate carrier family protein
Bra000028	A03:8907069-8907825	36.8111	0	-Inf	56.5309	0	-Inf	AT2G37920 (E=9e-077) emb1513 | emb1513 (embryo defective 1513); copper ion transmembrane transporter
Bra000038	A03:8962374-8964291	0.437199	0	-Inf	0.0537403	0	-Inf	AT2G38090 (E=3e-137) | myb family transcription factor
Bra000045	A03:9001982-9004777	0.0163486	0	-Inf	0.0210497	0	-Inf	AT2G38240 (E=5e-176) | oxidoreductase, 2OG-Fe(II) oxygenase family protein
Bra000046	A03:9018249-9019385	0.084514	0	-Inf	0.0818226	0	-Inf	AT2G38250 (E=3e-073) | DNA-binding protein-related
Bra000052	A03:9057576-9058200	2.89701	0	-Inf	4.40089	0	-Inf	AT2G38310 (E=2e-101) | unknown protein
Bra000056	A03:9096590-9097259	0.361338	0	-Inf	0.981481	0	-Inf	AT2G38360 (E=1e-089) PRA1.B4 | PRA1.B4 (PRENYLATED RAB ACCEPTOR 1.B4)
Bra000067	A03:9138872-9140525	0.0323253	0	-Inf	0.0624248	0	-Inf	AT2G38500 (E=6e-163) | FUNCTIONS IN: molecular_function unknown; INVOLVED IN: biological_process unknown; EXPRESSED IN: 7 plant structures; EXPRESSED DURING: L mature pollen stage, M germinated pollen stage, 4 anthesis, petal differentiation and expansion stage; BEST Arabidopsis thaliana protein match is: DTA4 (DOWNSTREAM TARGET OF AGL15-4) (TAIR:AT1G79760.1); Has 26 Blast hits to 26 proteins in …
Bra000070	A03:9145382-9146991	0.794984	0	-Inf	1.21151	0	-Inf	AT2G38570 (E=6e-083) | FUNCTIONS IN: molecular_function unknown; INVOLVED IN: biological_process unknown; EXPRESSED IN: 22 plant structures; EXPRESSED DURING: 13 growth stages; CONTAINS InterPro DOMAIN/s: PRC-barrel-like (InterPro:IPR011033); Has 29 Blast hits to 29 proteins in 13 species: Archae - 0; Bacteria - 13; Metazoa - 0; Fungi - 0; Plants - 12; Viruses - 0; Other Eukaryotes - 4 (source: N…
Bra000072	A03:9152115-9153095	0.102495	0	-Inf	0.133243	0	-Inf	AT4G30760 (E=3e-012) | unknown protein
Bra000073	A03:9153678-9154424	0.831167	0	-Inf	2.50366	0	-Inf	None
Bra000074	A03:9163174-9164545	0.286333	0	-Inf	0.0336907	0	-Inf	AT2G38600 (E=7e-123) | acid phosphatase class B family protein
Bra000077	A03:9174188-9175410	0.0193982	0	-Inf	0.850587	0	-Inf	AT2G38620 (E=3e-162) CDKB1;2 | CDKB1;2 (cyclin-dependent kinase B1;2); cyclin binding / kinase/ protein serine/threonine kinase
Bra000090	A03:9214530-9216318	5.03303	0	-Inf	1.20917	0	-Inf	AT2G38750 (E=9e-152) ANNAT4 | ANNAT4 (ANNEXIN ARABIDOPSIS 4); calcium ion binding / calcium-dependent phospholipid binding
Bra000093	A03:9223820-9224405	0.167536	0	-Inf	0.109355	0	-Inf	AT2G38790 (E=2e-066) | unknown protein
Bra000098	A03:9236559-9237656	8.59431	0	-Inf	4.66755	0	-Inf	AT2G38820 (E=3e-114) | unknown protein
Bra000119	A03:9356888-9359183	0.0571197	0	-Inf	0.219455	0	-Inf	AT2G39180 (E=0.0) CCR2, ATCRR2 | CCR2 (ARABIDOPSIS THALIANA CRINKLY4 RELATED 2); ATP binding / kinase/ protein kinase/ protein serine/threonine kinase/ protein tyrosine kinase/ receptor
Bra000143	A03:9528601-9529729	3.21135	0	-Inf	3.93798	0	-Inf	AT2G39720 (E=3e-121) RHC2A | RHC2A; protein binding / zinc ion binding
Bra000159	A03:9629203-9630832	31.2635	0	-Inf	38.7797	0	-Inf	AT2G40010 (E=8e-149) | 60S acidic ribosomal protein P0 (RPP0A)
Bra000165	A03:9657468-9657813	1.64942	0	-Inf	3.04291	0	-Inf	AT2G40080 (E=1e-045) ELF4 | ELF4 (EARLY FLOWERING 4)
Bra000170	A03:9700465-9700861	14.8186	0	-Inf	16.0373	0	-Inf	AT2G40140 (E=6e-040) CZF1, ZFAR1, SZF2, ATSZF2 | CZF1; transcription factor
Bra000174	A03:9711577-9713080	0.109406	0	-Inf	0.080464	0	-Inf	AT2G40180 (E=1e-149) ATHPP2C5 | ATHPP2C5; catalytic/ protein serine/threonine phosphatase
Bra000179	A03:9740244-9741537	0.39128	0	-Inf	0.697417	0	-Inf	AT2G40230 (E=9e-218) | transferase family protein
Bra000180	A03:9752690-9754265	0.0430967	0	-Inf	0.0554304	0	-Inf	AT2G40260 (E=1e-159) | myb family transcription factor
Bra000184	A03:9772565-9773204	4.94714	0	-Inf	8.0569	0	-Inf	AT2G40330 (E=4e-096) | Bet v I allergen family protein
Bra000190	A03:9800080-9801790	2.16646	0	-Inf	1.73498	0	-Inf	AT2G40480 (E=4e-168) | unknown protein
Bra000195	A03:9815558-9817501	0.264498	0	-Inf	0.0227195	0	-Inf	AT2G40620 (E=3e-085) | bZIP transcription factor family protein
Bra000206	A03:9875144-9876358	0.832621	0	-Inf	0.759774	0	-Inf	AT2G40815 (E=2e-081) | FUNCTIONS IN: molecular_function unknown; INVOLVED IN: biological_process unknown; LOCATED IN: cellular_component unknown; CONTAINS InterPro DOMAIN/s: C2 calcium-dependent membrane targeting (InterPro:IPR000008).
Bra000211	A03:9892510-9894826	7.01385	0	-Inf	3.38169	0	-Inf	AT2G40890 (E=2e-286) CYP98A3 | CYP98A3 (cytochrome P450, family 98, subfamily A, polypeptide 3); monooxygenase/ p-coumarate 3-hydroxylase
Bra000213	A03:9910462-9916008	1.04719	0	-Inf	0.932855	0	-Inf	AT2G40980 (E=2e-224) | LOCATED IN: plasma membrane; EXPRESSED IN: 22 plant structures; EXPRESSED DURING: 13 growth stages; CONTAINS InterPro DOMAIN/s: Protein kinase-like (InterPro:IPR011009); Has 152 Blast hits to 139 proteins in 56 species: Archae - 0; Bacteria - 74; Metazoa - 0; Fungi - 0; Plants - 60; Viruses - 0; Other Eukaryotes - 18 (source: NCBI BLink).
Bra000214	A03:9927920-9928464	21.6683	0	-Inf	42.4391	0	-Inf	AT2G27030 (E=1e-081) CAM5 | CAM5 (CALMODULIN 5); calcium ion binding
Bra000217	A03:9942398-9945269	1.57471	0	-Inf	0.690586	0	-Inf	AT2G41190 (E=2e-248) | amino acid transporter family protein
Bra000223	A03:9987607-9989831	0.154036	0	-Inf	0.0792916	0	-Inf	AT2G41300 (E=7e-173) | strictosidine synthase
Bra000245	A03:10123084-10123831	0.492604	0	-Inf	0.106339	0	-Inf	AT2G41940 (E=3e-086) ZFP8 | ZFP8 (ZINC FINGER PROTEIN 8); nucleic acid binding / transcription factor/ zinc ion binding
Bra000253	A03:10150500-10151831	0.34422	0	-Inf	0.59304	0	-Inf	AT2G42070 (E=7e-137) ATNUDT23, ATNUDX23 | ATNUDX23 (ARABIDOPSIS THALIANA NUDIX HYDROLASE HOMOLOG 23); FAD diphosphatase/ hydrolase
Bra000263	A03:10235433-10236119	36.8087	0	-Inf	1.82517	0	-Inf	AT2G42530 (E=7e-048) COR15B | COR15B (COLD REGULATED 15B)
Bra000265	A03:10239230-10240310	31.1795	0	-Inf	2.79282	0	-Inf	AT2G42530 (E=4e-046) COR15B | COR15B (COLD REGULATED 15B)
Bra000267	A03:10250532-10253013	0.801552	0	-Inf	0.499406	0	-Inf	AT2G42580 (E=2e-297) TTL3, VIT | TTL3 (TETRATRICOPETIDE-REPEAT THIOREDOXIN-LIKE 3); binding / protein binding
Bra000284	A03:10338525-10341064	0.175913	0	-Inf	0.056462	0	-Inf	AT2G43020 (E=2e-246) ATPAO2 | ATPAO2 (Polyamine oxidase 2); amine oxidase/ electron carrier/ oxidoreductase
Bra000285	A03:10341925-10342726	124.87	0	-Inf	123.543	0	-Inf	AT2G43030 (E=4e-114) | ribosomal protein L3 family protein
Bra000290	A03:10361481-10362205	3.91789	0	-Inf	1.33149	0	-Inf	AT2G43130 (E=1e-112) ARA4, ATRAB11F, ATRABA5C, ARA-4, RABA5C | ARA4; GTP binding / GTPase/ protein binding
Bra000291	A03:10363383-10365568	0.230892	0	-Inf	0.100287	0	-Inf	AT2G43140 (E=7e-069) | DNA binding / transcription factor
Bra000318	A03:10529217-10531266	0.135678	0	-Inf	0.782808	0	-Inf	AT2G43680 (E=9e-150) IQD14 | IQD14; calmodulin binding
Bra000330	A03:10566265-10589800	0.262896	0	-Inf	0.138148	0	-Inf	AT2G43820 (E=4e-213) GT, UGT74F2 | UGT74F2 (UDP-GLUCOSYLTRANSFERASE 74F2); UDP-glucose:4-aminobenzoate acylglucosyltransferase/ UDP-glucosyltransferase/ UDP-glycosyltransferase/ transferase, transferring glycosyl groups / transferase, transferring hexosyl groups
Bra000336	A03:10615415-10617221	0.905025	0	-Inf	1.22476	0	-Inf	AT5G34930 (E=4e-132) | arogenate dehydrogenase
Bra000342	A03:10644902-10646108	10.6178	0	-Inf	9.56911	0	-Inf	AT2G44130 (E=1e-156) | kelch repeat-containing F-box family protein
Bra000345	A03:10655172-10657038	0.0568873	0	-Inf	0.0182905	0	-Inf	AT2G44190 (E=6e-071) EDE1 | EDE1 (ENDOSPERM DEFECTIVE 1); microtubule binding
Bra000348	A03:10671406-10678295	0.0125809	0	-Inf	0.0241673	0	-Inf	AT2G44260 (E=4e-157) | unknown protein
Bra000358	A03:10719191-10719579	16.8373	0	-Inf	68.0124	0	-Inf	AT2G44670 (E=2e-028) | senescence-associated protein-related
Bra000361	A03:10726575-10727426	0.558925	0	-Inf	0.468561	0	-Inf	AT2G44740 (E=1e-080) CYCP4;1 | CYCP4;1 (cyclin p4;1); cyclin-dependent protein kinase
Bra000366	A03:10760370-10761204	2.28415	0	-Inf	0.387588	0	-Inf	AT2G44940 (E=2e-076) | AP2 domain-containing transcription factor TINY, putative
Bra000369	A03:10775974-10776763	0.549957	0	-Inf	0.0420142	0	-Inf	AT2G45080 (E=2e-117) cycp3;1 | cycp3;1 (cyclin p3;1); cyclin-dependent protein kinase
Bra000372	A03:10789859-10794409	0.352374	0	-Inf	0.201995	0	-Inf	AT2G45120 (E=8e-095) | zinc finger (C2H2 type) family protein
Bra000388	A03:10871703-10872636	0.0783053	0	-Inf	0.126247	0	-Inf	AT1G10270 (E=5e-052) GRP23 | GRP23 (GLUTAMINE-RICH PROTEIN23); binding
Bra000395	A03:10917731-10918667	1.05229	0	-Inf	1.20637	0	-Inf	AT2G45680 (E=9e-099) | TCP family transcription factor, putative
Bra000399	A03:10932058-10933693	2.15166	0	-Inf	1.21058	0	-Inf	AT2G45720 (E=2e-196) | armadillo/beta-catenin repeat family protein
Bra000405	A03:10954954-10956281	0.364046	0	-Inf	0.168581	0	-Inf	AT2G45940 (E=2e-131) | unknown protein
Bra000412	A03:10990261-10992094	0.26816	0	-Inf	1.15462	0	-Inf	AT1G01680 (E=5e-071) | U-box domain-containing protein
Bra000416	A03:11003300-11005164	0.463011	0	-Inf	0.025975	0	-Inf	AT2G46225 (E=6e-137) ABIL1 | ABIL1 (Abi-1-like 1)
Bra000419	A03:11016524-11016839	18.8685	0	-Inf	11.5901	0	-Inf	AT2G46330 (E=1e-031) AGP16, ATAGP16 | AGP16 (ARABINOGALACTAN PROTEIN 16)
Bra000426	A03:11052664-11053063	12.971	0	-Inf	18.4988	0	-Inf	AT2G46490 (E=1e-041) | unknown protein
Bra000435	A03:11106802-11107657	2.4989	0	-Inf	7.78254	0	-Inf	AT2G46940 (E=8e-066) | unknown protein
Bra000444	A03:11158768-11160358	0.058567	0	-Inf	0.30057	0	-Inf	AT2G35030 (E=5e-077) | pentatricopeptide (PPR) repeat-containing protein
Bra000453	A03:11190759-11193776	0.360567	0	-Inf	0.27062	0	-Inf	AT2G47460 (E=7e-141) MYB12, ATMYB12, PFG1 | MYB12 (MYB DOMAIN PROTEIN 12); DNA binding / transcription activator/ transcription factor
Bra000465	A03:11235549-11236767	0.831475	0	-Inf	1.06901	0	-Inf	AT5G07900 (E=2e-179) | mitochondrial transcription termination factor family protein / mTERF family protein
Bra000468	A03:11248293-11248710	0.185469	0	-Inf	0.745836	0	-Inf	AT2G29950 (E=1e-035) ELF4-L1 | ELF4-L1 (ELF4-Like 1)
Bra000476	A03:11289313-11290418	0.778423	0	-Inf	0.8121	0	-Inf	AT2G29340 (E=2e-124) | short-chain dehydrogenase/reductase (SDR) family protein
Bra000479	A03:11308542-11308965	33.5236	0	-Inf	38.9059	0	-Inf	AT2G28870 (E=3e-033) | unknown protein
Bra000481	A03:11327526-11327838	2.07675	0	-Inf	3.7667	0	-Inf	AT5G59690 (E=3e-041) | histone H4
Bra000496	A03:11418309-11418988	0.56241	0	-Inf	0.813919	0	-Inf	AT2G28105 (E=3e-071) | FUNCTIONS IN: molecular_function unknown; INVOLVED IN: biological_process unknown; LOCATED IN: cellular_component unknown; CONTAINS InterPro DOMAIN/s: Nucleic acid-binding, OB-fold-like (InterPro:IPR016027); Has 12 Blast hits to 12 proteins in 6 species: Archae - 0; Bacteria - 0; Metazoa - 2; Fungi - 0; Plants - 10; Viruses - 0; Other Eukaryotes - 0 (source: NCBI BLink).
Bra000513	A03:11517546-11517945	1.48848	0	-Inf	0.143402	0	-Inf	None
Bra000514	A03:11520589-11523206	0.00877661	0	-Inf	0.0225092	0	-Inf	AT1G46984 (E=2e-094) | F-box protein-related
Bra000523	A03:11572947-11573738	0.804486	0	-Inf	1.08416	0	-Inf	AT2G27140 (E=5e-057) | heat shock family protein
Bra000526	A03:11582916-11583687	0.0780907	0	-Inf	0.202144	0	-Inf	AT2G27080 (E=7e-112) | harpin-induced protein-related / HIN1-related / harpin-responsive protein-related
Bra000527	A03:11587855-11588957	0.0569918	0	-Inf	0.300043	0	-Inf	AT2G27035 (E=2e-057) | plastocyanin-like domain-containing protein
Bra000536	A03:11625595-11626894	12.0392	0	-Inf	18.4451	0	-Inf	AT2G26600 (E=3e-180) | glycosyl hydrolase family 17 protein
Bra000544	A03:11690372-11691287	10.1258	0	-Inf	21.7909	0	-Inf	AT2G26530 (E=1e-070) AR781 | AR781
Bra000546	A03:11697133-11698613	1.62015	0	-Inf	1.11085	0	-Inf	AT1G64840 (E=5e-083) | F-box family protein
Bra000548	A03:11703964-11706218	0.135238	0	-Inf	0.0789765	0	-Inf	AT2G24850 (E=2e-196) TAT3, TAT | TAT3 (TYROSINE AMINOTRANSFERASE 3); L-tyrosine:2-oxoglutarate aminotransferase/ transaminase
Bra000555	A03:11750628-11755459	0.138206	0	-Inf	0.0442159	0	-Inf	AT2G25790 (E=0.0) | leucine-rich repeat transmembrane protein kinase, putative
Bra000556	A03:11759200-11760415	0.0273489	0	-Inf	0.0351628	0	-Inf	AT5G19100 (E=8e-099) | extracellular dermal glycoprotein-related / EDGP-related
Bra000589	A03:11928359-11929552	0.0598278	0	-Inf	0.0514538	0	-Inf	AT2G41990 (E=5e-104) | unknown protein
Bra000591	A03:11932855-11934070	0.0410234	0	-Inf	0.0351628	0	-Inf	AT2G42005 (E=1e-187) | amino acid transporter family protein
Bra000599	A03:11991971-11992846	0.172721	0	-Inf	0.446775	0	-Inf	AT5G49920 (E=6e-091) | octicosapeptide/Phox/Bem1p (PB1) domain-containing protein
Bra000633	A03:12148181-12149443	2.30393	0	-Inf	3.31058	0	-Inf	AT3G12350 (E=1e-078) | F-box family protein
Bra000644	A03:12232958-12235019	0.251311	0	-Inf	0.202394	0	-Inf	AT4G08210 (E=0.0) | pentatricopeptide (PPR) repeat-containing protein
Bra000648	A03:12275154-12297889	3.76948	0	-Inf	2.38955	0	-Inf	AT4G08510 (E=2e-039) | unknown protein
Bra000669	A03:12377786-12378227	1.10771	0	-Inf	0.632118	0	-Inf	AT4G38940 (E=4e-029) | kelch repeat-containing F-box family protein
Bra000670	A03:12380142-12380523	0.745489	0	-Inf	4.22047	0	-Inf	arabinogalactan protein 10 [Source:TAIR;Acc:AT4G09030](projected from arabidopsis_thaliana,AT4G09030)
Bra000672	A03:12385004-12386514	0.0337319	0	-Inf	0.0217219	0	-Inf	AT4G09060 (E=8e-136) | unknown protein
Bra000676	A03:12404067-12404436	4.46838	0	-Inf	5.72359	0	-Inf	AT4G09170 (E=5e-011) | unknown protein
Bra000677	A03:12405088-12406147	0.229761	0	-Inf	0.401498	0	-Inf	AT3G57710 (E=3e-158) | protein kinase family protein
Bra000680	A03:12417251-12418112	2.26453	0	-Inf	4.03336	0	-Inf	AT4G09460 (E=8e-074) ATMYB6 | ATMYB6; DNA binding / transcription factor
Bra000686	A03:12461075-12463400	0.306424	0	-Inf	0.424443	0	-Inf	AT1G34300 (E=3e-254) | lectin protein kinase family protein
Bra000692	A03:12498309-12499310	107	0	-Inf	171.341	0	-Inf	AT1G34030 (E=8e-075) | 40S ribosomal protein S18 (RPS18B)
Bra000703	A03:12552183-12552777	0.16274	0	-Inf	4.14007	0	-Inf	AT4G10250 (E=9e-089) ATHSP22.0 | ATHSP22.0
Bra000707	A03:12566480-12570728	0.84789	0	-Inf	0.443759	0	-Inf	AT4G10310 (E=1e-210) HKT1, ATHKT1 | HKT1 (HIGH-AFFINITY K+ TRANSPORTER 1); sodium ion transmembrane transporter
Bra000718	A03:12655200-12658249	0.0215446	0	-Inf	0.0414856	0	-Inf	AT4G24140 (E=6e-212) | hydrolase, alpha/beta fold family protein
Bra000720	A03:12664720-12665954	0.0808133	0	-Inf	0.145658	0	-Inf	AT4G30570 (E=3e-156) | GDP-mannose pyrophosphorylase, putative
Bra000742	A03:12805458-12809145	3.24027	0	-Inf	5.22461	0	-Inf	AT4G11360 (E=1e-058) RHA1B | RHA1B; protein binding / zinc ion binding
Bra000745	A03:12825507-12827497	0.0834148	0	-Inf	0.0153066	0	-Inf	AT4G11530 (E=7e-091) | kinase
Bra000749	A03:12856332-12857364	10.0401	0	-Inf	8.42598	0	-Inf	AT4G11660 (E=7e-105) AT-HSFB2B, HSFB2B | AT-HSFB2B; transcription factor/ transcription repressor
Bra000750	A03:12858785-12860431	0.0154036	0	-Inf	0.0396458	0	-Inf	AT4G00893 (E=1e-111) | LOCATED IN: chloroplast; CONTAINS InterPro DOMAIN/s: Cyclin-like F-box (InterPro:IPR001810); BEST Arabidopsis thaliana protein match is: unknown protein (TAIR:AT4G12370.1); Has 133 Blast hits to 128 proteins in 4 species: Archae - 0; Bacteria - 0; Metazoa - 0; Fungi - 0; Plants - 133; Viruses - 0; Other Eukaryotes - 0 (source: NCBI BLink).
Bra000759	A03:12917659-12921594	1.22387	0	-Inf	0.410883	0	-Inf	AT4G12010 (E=0.0) | disease resistance protein (TIR-NBS-LRR class), putative
Bra000760	A03:12923139-12925015	1.71466	0	-Inf	0.104142	0	-Inf	AT4G12030 (E=6e-182) | bile acid:sodium symporter family protein
Bra000767	A03:12947433-12948501	0.876105	0	-Inf	0.731085	0	-Inf	AT4G12240 (E=2e-142) | zinc finger (C2H2 type) family protein
Bra000772	A03:12967349-12967847	0.11711	0	-Inf	0.077133	0	-Inf	AT4G12410 (E=2e-072) | auxin-responsive family protein
Bra000778	A03:13033971-13034373	3.11395	0	-Inf	0.27969	0	-Inf	AT4G12520 (E=2e-037) | protease inhibitor/seed storage/lipid transfer protein (LTP) family protein
Bra000779	A03:13060682-13062971	1.46976	0	-Inf	1.80362	0	-Inf	AT4G12570 (E=3e-274) UPL5 | UPL5 (UBIQUITIN PROTEIN LIGASE 5); acid-amino acid ligase/ binding / ubiquitin-protein ligase
Bra000781	A03:13079238-13080051	28.0073	0	-Inf	57.7315	0	-Inf	AT5G20160 (E=5e-054) | ribosomal protein L7Ae/L30e/S12e/Gadd45 family protein
Bra000804	A03:13241556-13241904	0.529748	0	-Inf	0.243919	0	-Inf	AT4G04745 (E=8e-039) | unknown protein
Bra000813	A03:13302611-13302890	17.4868	0	-Inf	19.4123	0	-Inf	AT4G05070 (E=1e-021) | unknown protein
Bra000847	A03:13472935-13474533	0.225594	0	-Inf	0.0242373	0	-Inf	AT4G03070 (E=8e-132) AOP1, AOP, AOP1.1 | AOP1; oxidoreductase, acting on paired donors, with incorporation or reduction of molecular oxygen, 2-oxoglutarate as one donor, and incorporation of one atom each of oxygen into both donors
Bra000859	A03:13535765-13537869	0.0621535	0	-Inf	0.160429	0	-Inf	AT4G02850 (E=1e-135) | phenazine biosynthesis PhzC/PhzF family protein
Bra000862	A03:13544962-13546263	0.542458	0	-Inf	0.186426	0	-Inf	AT4G02800 (E=4e-115) | unknown protein
Bra000870	A03:13620183-13621326	0.0148148	0	-Inf	0.0190592	0	-Inf	AT4G39756 (E=1e-079) | kelch repeat-containing F-box family protein
Bra000877	A03:13649209-13651190	5.07089	0	-Inf	4.54813	0	-Inf	AT4G02500 (E=2e-252) ATXT2, XXT2, XT2 | XT2 (UDP-XYLOSYLTRANSFERASE 2); UDP-xylosyltransferase/ transferase/ transferase, transferring glycosyl groups / xyloglucan 6-xylosyltransferase
Bra000881	A03:13677450-13679478	0.102422	0	-Inf	0.0281222	0	-Inf	AT4G02420 (E=9e-268) | lectin protein kinase, putative
Bra000884	A03:13696672-13697051	10.3995	0	-Inf	106.978	0	-Inf	AT4G02380 (E=4e-029) SAG21, AtLEA5 | SAG21 (SENESCENCE-ASSOCIATED GENE 21)
Bra000888	A03:13718919-13720874	0.151112	0	-Inf	0.492647	0	-Inf	AT2G21450 (E=1e-118) CHR34 | CHR34 (chromatin remodeling 34); ATP binding / DNA binding / helicase/ nucleic acid binding
Bra000893	A03:13758146-13760139	0.658446	0	-Inf	0.783488	0	-Inf	AT4G02100 (E=7e-229) | DNAJ heat shock N-terminal domain-containing protein
Bra000897	A03:13781957-13785754	0.0340657	0	-Inf	0.0087276	0	-Inf	AT4G02060 (E=0.0) PRL, MCM7 | PRL (PROLIFERA); ATP binding / DNA binding / DNA-dependent ATPase/ nucleoside-triphosphatase/ nucleotide binding
Bra000902	A03:13811960-13814232	3.25408	0	-Inf	5.94724	0	-Inf	AT4G01990 (E=3e-200) | pentatricopeptide (PPR) repeat-containing protein
Bra000909	A03:13862748-13863669	2.56576	0	-Inf	4.56436	0	-Inf	AT4G01897 (E=1e-048) | unknown protein
Bra000910	A03:13863839-13864256	10.5717	0	-Inf	9.82017	0	-Inf	AT4G01895 (E=7e-018) | systemic acquired resistance (SAR) regulator protein NIMIN-1-related
Bra000916	A03:13890207-13890970	5.49435	0	-Inf	3.55122	0	-Inf	AT4G01790 (E=4e-051) | ribosomal protein L7Ae/L30e/S12e/Gadd45 family protein / ribonuclease P-related
Bra000921	A03:13920694-13921075	0.621241	0	-Inf	0.337637	0	-Inf	AT4G01575 (E=4e-046) | serine protease inhibitor, Kazal-type family protein
Bra000927	A03:13967435-13968125	2.49344	0	-Inf	1.21358	0	-Inf	AT4G01410 (E=9e-084) | harpin-induced family protein / HIN1 family protein / harpin-responsive family protein
Bra000942	A03:14054273-14055239	1.04357	0	-Inf	0.192187	0	-Inf	AT4G01070 (E=2e-151) GT72B1, UGT72B1 | GT72B1; UDP-glucosyltransferase/ UDP-glycosyltransferase/ transferase, transferring glycosyl groups
Bra000950	A03:14100502-14102041	2.40411	0	-Inf	1.39365	0	-Inf	AT4G01220 (E=4e-171) | FUNCTIONS IN: molecular_function unknown; INVOLVED IN: biological_process unknown; LOCATED IN: endoplasmic reticulum; EXPRESSED IN: 22 plant structures; EXPRESSED DURING: 13 growth stages; CONTAINS InterPro DOMAIN/s: Reticulon (InterPro:IPR003388); BEST Arabidopsis thaliana protein match is: RGXT1 (rhamnogalacturonan xylosyltransferase 1); UDP-xylosyltransferase (TAIR:AT4G0…
Bra000963	A03:14148213-14151363	0.915926	0	-Inf	1.59996	0	-Inf	AT3G61300 (E=7e-267) | C2 domain-containing protein
Bra000968	A03:14167486-14168428	1.98999	0	-Inf	2.16146	0	-Inf	AT4G00525 (E=2e-034) | unknown protein
Bra000970	A03:14178723-14182754	0.235268	0	-Inf	0.0486294	0	-Inf	AT4G00480 (E=2e-199) ATMYC1, myc1 | myc-related transcription factor (MYC1)
Bra000971	A03:14185128-14186999	0.14367	0	-Inf	0.0141891	0	-Inf	AT4G00460 (E=8e-258) ATROPGEF3, ROPGEF3 | Rho guanyl-nucleotide exchange factor
Bra000983	A03:14273441-14275885	1.20991e-05	0	-Inf	0.0853572	0	-Inf	AT3G01870 (E=2e-223) | unknown protein
Bra000985	A03:14279409-14279835	2.35245	0	-Inf	5.24142	0	-Inf	AT3G01830 (E=1e-041) | calmodulin-related protein, putative
Bra000987	A03:14280435-14285125	1.95335	0	-Inf	0.791281	0	-Inf	AT3G01810 (E=1e-211) | FUNCTIONS IN: molecular_function unknown; INVOLVED IN: biological_process unknown; LOCATED IN: plasma membrane; EXPRESSED IN: 21 plant structures; EXPRESSED DURING: 13 growth stages; BEST Arabidopsis thaliana protein match is: nucleolar protein gar2-related (TAIR:AT2G42320.2); Has 1293 Blast hits to 384 proteins in 97 species: Archae - 2; Bacteria - 96; Metazoa - 212; Fungi…
Bra000995	A03:14304242-14304653	0.387503	0	-Inf	0.13011	0	-Inf	AT3G01700 (E=4e-021) AGP11, ATAGP11 | AGP11
Bra000996	A03:14305598-14308858	0.426481	0	-Inf	0.147571	0	-Inf	AT3G01670 (E=0.0) | unknown protein
Bra001001	A03:14326267-14328196	0.0930594	0	-Inf	0.0695733	0	-Inf	AT3G01580 (E=5e-314) | pentatricopeptide (PPR) repeat-containing protein
Bra001005	A03:14344924-14346208	0.689005	0	-Inf	0.363486	0	-Inf	AT3G01530 (E=6e-087) AtMYB57 | AtMYB57 (myb domain protein 57); DNA binding / transcription factor
Bra001006	A03:14356357-14357422	2.28006	0	-Inf	3.73241	0	-Inf	AT3G01400 (E=4e-149) | armadillo/beta-catenin repeat family protein
Bra001043	A03:14509277-14510060	3.13975	0	-Inf	0.163022	0	-Inf	AT3G02380 (E=1e-075) COL2 | COL2 (constans-like 2); transcription factor/ zinc ion binding
Bra001044	A03:14511126-14512605	0.223955	0	-Inf	0.0958258	0	-Inf	AT3G02400 (E=9e-044) | forkhead-associated domain-containing protein / FHA domain-containing protein / AT hook motif-containing protein
Bra001047	A03:14520528-14522487	1.112	0	-Inf	1.39579	0	-Inf	AT3G02490 (E=1e-302) | pentatricopeptide (PPR) repeat-containing protein
Bra001066	A03:14580682-14582197	3.70548	0	-Inf	1.11512	0	-Inf	AT3G02830 (E=1e-115) ZFN1 | ZFN1 (ZINC FINGER PROTEIN 1); DNA binding / nuclease/ nucleic acid binding
Bra001067	A03:14583647-14589032	0.510575	0	-Inf	0.198954	0	-Inf	AT3G02840 (E=3e-152) | immediate-early fungal elicitor family protein
Bra001080	A03:14626997-14627969	3.23289	0	-Inf	4.31017	0	-Inf	AT3G03550 (E=5e-063) | zinc finger (C3HC4-type RING finger) family protein
Bra001093	A03:14703830-14706576	0.0295759	0	-Inf	0.0151474	0	-Inf	AT4G04220 (E=2e-171) AtRLP46 | AtRLP46 (Receptor Like Protein 46); kinase/ protein binding
Bra001098	A03:14743517-14743958	41.9349	0	-Inf	62.6851	0	-Inf	AT5G18380 (E=2e-073) | 40S ribosomal protein S16 (RPS16C)
Bra001102	A03:14755848-14756525	8.70614	0	-Inf	12.957	0	-Inf	AT3G04310 (E=2e-064) | unknown protein
Bra001103	A03:14757389-14758583	0.027977	0	-Inf	0.143906	0	-Inf	AT3G04360 (E=1e-119) | FUNCTIONS IN: molecular_function unknown; INVOLVED IN: biological_process unknown; LOCATED IN: cellular_component unknown; EXPRESSED IN: 9 plant structures; EXPRESSED DURING: L mature pollen stage, M germinated pollen stage, 4 anthesis, C globular stage, petal differentiation and expansion stage; CONTAINS InterPro DOMAIN/s: C2 membrane targeting protein (InterPro:IPR018029)…
Bra001106	A03:14771552-14774671	0.516973	0	-Inf	0.618667	0	-Inf	AT3G04480 (E=0.0) | endoribonuclease
Bra001115	A03:14832978-14833994	3.29517	0	-Inf	0.936446	0	-Inf	AT3G04630 (E=3e-082) WDL1 | WDL1
Bra001134	A03:14911520-14914774	22.1945	0	-Inf	22.3791	0	-Inf	AT3G05020 (E=6e-045) ACP1, ACP | ACP1 (acyl carrier protein 1); acyl carrier
Bra001135	A03:14917320-14923417	0.329152	0	-Inf	0.931883	0	-Inf	AT3G05070 (E=6e-007) | FUNCTIONS IN: molecular_function unknown; INVOLVED IN: biological_process unknown; LOCATED IN: cellular_component unknown; EXPRESSED IN: 22 plant structures; EXPRESSED DURING: 13 growth stages; CONTAINS InterPro DOMAIN/s: mRNA splicing factor, Cwf18 (InterPro:IPR013169); Has 221 Blast hits to 221 proteins in 113 species: Archae - 0; Bacteria - 0; Metazoa - 107; Fungi - 54; …
Bra001137	A03:14924373-14926073	3.22388	0	-Inf	2.97889	0	-Inf	AT3G05100 (E=4e-145) | FUNCTIONS IN: molecular_function unknown; INVOLVED IN: biological_process unknown; LOCATED IN: cellular_component unknown; EXPRESSED IN: 22 plant structures; EXPRESSED DURING: 14 growth stages; CONTAINS InterPro DOMAIN/s: Methyltransferase type 12 (InterPro:IPR013217); Has 53 Blast hits to 53 proteins in 21 species: Archae - 2; Bacteria - 27; Metazoa - 0; Fungi - 3; Plants …
Bra001148	A03:14976354-14979096	0.0175027	0	-Inf	0.0298789	0	-Inf	AT3G05470 (E=4e-226) | formin homology 2 domain-containing protein / FH2 domain-containing protein
Bra001153	A03:15000727-15002990	2.90586	0	-Inf	1.91852	0	-Inf	AT3G05545 (E=2e-143) | transcription factor, putative / zinc finger (C3HC4 type RING finger) family protein
Bra001155	A03:15005565-15006791	1.5295	0	-Inf	0.632989	0	-Inf	AT3G05580 (E=2e-177) | serine/threonine protein phosphatase, putative
Bra001179	A03:15165516-15166279	0.61497	0	-Inf	1.11036	0	-Inf	AT3G06035 (E=5e-067) | unknown protein
Bra001184	A03:15188242-15189854	0.101035	0	-Inf	0.0144146	0	-Inf	AT3G06130 (E=2e-045) | heavy-metal-associated domain-containing protein
Bra001187	A03:15202031-15202829	2.66484	0	-Inf	5.106	0	-Inf	AT3G06240 (E=3e-104) | F-box family protein
Bra001189	A03:15217294-15218445	2.76864	0	-Inf	4.46632	0	-Inf	AT3G06270 (E=1e-167) | protein phosphatase 2C, putative / PP2C, putative
Bra001193	A03:15236740-15242187	3.54688	0	-Inf	4.38187	0	-Inf	AT3G06330 (E=9e-151) | zinc finger (C3HC4-type RING finger) family protein
Bra001195	A03:15244506-15247514	0.532115	0	-Inf	0.259898	0	-Inf	AT3G06350 (E=2e-268) EMB3004, MEE32 | MEE32 (MATERNAL EFFECT EMBRYO ARREST 32); 3-dehydroquinate dehydratase/ NADP or NADPH binding / binding / catalytic/ shikimate 5-dehydrogenase
Bra001196	A03:15248763-15251065	0.667319	0	-Inf	0.551038	0	-Inf	AT3G06410 (E=9e-186) | nucleic acid binding / zinc ion binding
Bra001205	A03:15310466-15312422	0.0414357	0	-Inf	0.106953	0	-Inf	AT3G06620 (E=2e-149) | protein kinase family protein
Bra001217	A03:15384931-15385402	0.801503	0	-Inf	3.71151	0	-Inf	AT3G06780 (E=2e-011) | glycine-rich protein
Bra001218	A03:15391828-15392575	7.66726	0	-Inf	8.38627	0	-Inf	AT3G06790 (E=5e-051) | plastid developmental protein DAG, putative
Bra001224	A03:15414545-15414926	1.73947	0	-Inf	0.337637	0	-Inf	AT3G06890 (E=4e-020) | unknown protein
Bra001225	A03:15415804-15418773	0.40252	0	-Inf	0.273879	0	-Inf	AT3G06920 (E=0.0) | pentatricopeptide (PPR) repeat-containing protein
Bra001232	A03:15439155-15443339	5.83639	0	-Inf	9.80488	0	-Inf	AT3G07050 (E=2e-216) | GTP-binding family protein
Bra001236	A03:15456995-15457661	1.19174	0	-Inf	1.11827	0	-Inf	AT3G07120 (E=5e-034) | zinc finger (C3HC4-type RING finger) family protein
Bra001241	A03:15484111-15485440	0.0361952	0	-Inf	0.188422	0	-Inf	AT3G07195 (E=1e-057) | proline-rich family protein
Bra001245	A03:15495496-15498299	0.0449945	0	-Inf	0.034623	0	-Inf	AT3G07320 (E=2e-213) | glycosyl hydrolase family 17 protein
Bra001249	A03:15523669-15524437	28.4163	0	-Inf	31.6631	0	-Inf	AT3G07390 (E=2e-071) AIR12 | AIR12; extracellular matrix structural constituent
Bra001250	A03:15525343-15527924	0.281139	0	-Inf	0.566299	0	-Inf	AT3G07420 (E=3e-156) NS2, ATNS2, SYNC2_ARATH, SYNC2 | NS2; asparagine-tRNA ligase
Bra001260	A03:15557186-15558099	2.75581	0	-Inf	3.55165	0	-Inf	AT3G07590 (E=1e-042) | small nuclear ribonucleoprotein D1, putative / snRNP core protein D1, putative / Sm protein D1, putative
Bra001264	A03:15568411-15569869	0.0494248	0	-Inf	0.0424277	0	-Inf	AT3G07650 (E=2e-152) COL9 | COL9 (CONSTANS-LIKE 9); transcription factor/ zinc ion binding
Bra001291	A03:15717100-15717556	374.096	0	-Inf	505.834	0	-Inf	AT3G10020 (E=4e-053) | unknown protein
Bra001293	A03:15723117-15725216	0.0844855	0	-Inf	0.0724316	0	-Inf	AT5G03630 (E=9e-134) ATMDAR2 | ATMDAR2; monodehydroascorbate reductase (NADH)
Bra001314	A03:15809406-15811009	2.40616	0	-Inf	2.39544	0	-Inf	AT3G09350 (E=2e-167) | armadillo/beta-catenin repeat family protein
Bra001326	A03:15857584-15859564	0.142925	0	-Inf	0.038559	0	-Inf	AT3G09070 (E=7e-217) | glycine-rich protein
Bra001327	A03:15860442-15862506	0.279561	0	-Inf	0.229605	0	-Inf	AT3G09060 (E=0.0) | pentatricopeptide (PPR) repeat-containing protein
Bra001332	A03:15888848-15889889	2.57032	0	-Inf	3.85113	0	-Inf	AT3G09190 (E=3e-110) | sugar binding
Bra001352	A03:15965911-15966835	0.853539	0	-Inf	0.230453	0	-Inf	AT3G08600 (E=3e-085) | unknown protein
Bra001357	A03:15993217-15996354	0.4378	0	-Inf	0.112064	0	-Inf	AT3G10390 (E=0.0) FLD | FLD (FLOWERING LOCUS D); amine oxidase/ electron carrier/ oxidoreductase
Bra001367	A03:16024728-16025100	9.61863	0	-Inf	39.9237	0	-Inf	AT3G10525 (E=4e-031) | FUNCTIONS IN: molecular_function unknown; INVOLVED IN: biological_process unknown; LOCATED IN: cellular_component unknown; EXPRESSED IN: 22 plant structures; EXPRESSED DURING: 13 growth stages; BEST Arabidopsis thaliana protein match is: SIM (SIAMESE); cyclin-dependent protein kinase inhibitor (TAIR:AT5G04470.1); Has 23 Blast hits to 23 proteins in 6 species: Archae - 0; Ba…
Bra001377	A03:16072888-16073296	1.38716	0	-Inf	5.59476	0	-Inf	AT3G10760 (E=4e-023) | myb family transcription factor
Bra001402	A03:16199381-16201790	0.177741	0	-Inf	0.0268387	0	-Inf	AT3G11420 (E=3e-211) | fringe-related protein
Bra001413	A03:16264474-16264834	1.53625	0	-Inf	0.210848	0	-Inf	AT3G11600 (E=2e-038) | unknown protein
Bra001453	A03:16434611-16436042	0.0569261	0	-Inf	0.331991	0	-Inf	AT3G12500 (E=4e-095) ATHCHIB, PR3, PR-3, CHI-B, B-CHI | ATHCHIB (ARABIDOPSIS THALIANA BASIC CHITINASE); chitinase
Bra001454	A03:16439495-16442613	0.911718	0	-Inf	0.0867174	0	-Inf	AT3G12500 (E=6e-093) ATHCHIB, PR3, PR-3, CHI-B, B-CHI | ATHCHIB (ARABIDOPSIS THALIANA BASIC CHITINASE); chitinase
Bra001458	A03:16460694-16467231	0.0540862	0	-Inf	0.021288	0	-Inf	AT3G12590 (E=0.0) | unknown protein
Bra001460	A03:16470618-16471737	16.046	0	-Inf	6.6081	0	-Inf	AT3G12610 (E=7e-184) DRT100 | DRT100 (DNA-DAMAGE REPAIR/TOLERATION 100); nucleotide binding / protein binding
Bra001461	A03:16477409-16477889	70.1184	0	-Inf	68.5199	0	-Inf	AT3G12630 (E=2e-063) | zinc finger (AN1-like) family protein
Bra001463	A03:16479278-16483250	2.86921	0	-Inf	7.96171	0	-Inf	AT3G12650 (E=3e-079) | unknown protein
Bra001466	A03:16498756-16500980	3.13256	0	-Inf	0.187907	0	-Inf	AT3G12700 (E=3e-182) | aspartyl protease family protein
Bra001467	A03:16502189-16504126	23.7426	0	-Inf	53.6224	0	-Inf	AT3G12740 (E=2e-169) ALIS1 | ALIS1 (ALA-INTERACTING SUBUNIT 1); phospholipid transporter
Bra001473	A03:16522901-16523282	0.745489	0	-Inf	1.51937	0	-Inf	AT3G12830 (E=2e-045) | auxin-responsive family protein
Bra001474	A03:16529690-16532174	1.77653	0	-Inf	3.59235	0	-Inf	AT3G12860 (E=1e-235) | nucleolar protein Nop56, putative
Bra001477	A03:16564260-16565366	3.99185	0	-Inf	9.59713	0	-Inf	AT3G12920 (E=2e-137) | protein binding / zinc ion binding
Bra001492	A03:16663923-16665180	1.71399e-05	0	-Inf	0.947133	0	-Inf	AT3G13160 (E=8e-175) | pentatricopeptide (PPR) repeat-containing protein
Bra001497	A03:16678071-16678548	1.68399	0	-Inf	1.02721	0	-Inf	AT3G13310 (E=4e-059) | DNAJ heat shock N-terminal domain-containing protein
Bra001512	A03:16781767-16783896	0.0195223	0	-Inf	0.0125237	0	-Inf	AT3G13600 (E=2e-117) | calmodulin-binding family protein
Bra001516	A03:16797675-16798236	1.63639	0	-Inf	0.772912	0	-Inf	AT3G13650 (E=7e-072) | disease resistance response
Bra001526	A03:16861271-16862835	3.80688	0	-Inf	5.47874	0	-Inf	AT3G13882 (E=7e-067) | structural constituent of ribosome
Bra001552	A03:17008232-17009507	0.322795	0	-Inf	0.0902393	0	-Inf	AT3G14440 (E=2e-138) NCED3, ATNCED3, STO1, SIS7 | NCED3 (NINE-CIS-EPOXYCAROTENOID DIOXYGENASE 3); 9-cis-epoxycarotenoid dioxygenase
Bra001554	A03:17036180-17038280	0.0182366	0	-Inf	0.047009	0	-Inf	AT3G14450 (E=1e-155) CID9 | CID9 (CTC-Interacting Domain 9); RNA binding / protein binding
Bra001560	A03:17062778-17065204	0.0820333	0	-Inf	0.0131597	0	-Inf	AT3G14630 (E=2e-242) CYP72A9 | CYP72A9; electron carrier/ heme binding / iron ion binding / monooxygenase/ oxygen binding
Bra001571	A03:17137026-17138346	0.098355	0	-Inf	0.0631812	0	-Inf	AT1G53380 (E=9e-159) | unknown protein
Bra001573	A03:17143555-17145376	1.29454	0	-Inf	1.50003	0	-Inf	AT3G14920 (E=3e-244) | unknown protein
Bra001581	A03:17180325-17181225	3.0843	0	-Inf	3.9231	0	-Inf	AT3G15060 (E=4e-112) AtRABA1g | AtRABA1g (Arabidopsis Rab GTPase homolog A1g); GTP binding
Bra001588	A03:17217404-17218040	31.5119	0	-Inf	82.8015	0	-Inf	AT3G15210 (E=6e-068) ATERF-4, ERF4, RAP2.5, ATERF4 | ERF4 (ETHYLENE RESPONSIVE ELEMENT BINDING FACTOR 4); DNA binding / protein binding / transcription factor/ transcription repressor
Bra001590	A03:17233845-17236114	0.0853076	0	-Inf	0.0218758	0	-Inf	AT3G15340 (E=1e-174) PPI2 | PPI2 (proton pump interactor 2); protein binding
Bra001596	A03:17260948-17262007	5.59247	0	-Inf	5.50905	0	-Inf	AT3G15500 (E=6e-100) ATNAC3, ANAC055 | ANAC055 (ARABIDOPSIS NAC DOMAIN CONTAINING PROTEIN 55); transcription factor
Bra001597	A03:17280838-17282575	0.661553	0	-Inf	0.276859	0	-Inf	AT3G15510 (E=1e-148) ATNAC2, ANAC056, NARS1 | ATNAC2 (ARABIDOPSIS NAC DOMAIN CONTAINING PROTEIN 2); transcription factor
Bra001599	A03:17296922-17298770	0.453584	0	-Inf	0.283493	0	-Inf	AT3G15570 (E=4e-178) | phototropic-responsive NPH3 family protein
Bra001600	A03:17301323-17301659	81.0138	0	-Inf	27.8086	0	-Inf	AT3G15630 (E=6e-029) | unknown protein
Bra001615	A03:17411103-17411673	11.1439	0	-Inf	9.26855	0	-Inf	AT4G14540 (E=2e-062) NF-YB3 | NF-YB3 (NUCLEAR FACTOR Y, SUBUNIT B3); transcription factor
Bra001633	A03:17572926-17574320	0.136657	0	-Inf	0.0586146	0	-Inf	AT3G16490 (E=5e-147) IQD26 | IQD26 (IQ-domain 26); calmodulin binding
Bra001635	A03:17611109-17612327	0.708799	0	-Inf	0.945063	0	-Inf	AT3G16510 (E=7e-095) | C2 domain-containing protein
Bra001639	A03:17629293-17630130	0.596648	0	-Inf	0.326172	0	-Inf	AT3G16720 (E=6e-070) ATL2 | ATL2; protein binding / zinc ion binding
Bra001646	A03:17681803-17682598	20.8639	0	-Inf	20.989	0	-Inf	AT3G16990 (E=2e-104) | TENA/THI-4 family protein
Bra001651	A03:17692812-17693559	0.0821006	0	-Inf	0.0354462	0	-Inf	None
Bra001652	A03:17693999-17695425	0.0338659	0	-Inf	0.021809	0	-Inf	AT3G17060 (E=2e-182) | pectinesterase family protein
Bra001657	A03:17720860-17721424	0.629664	0	-Inf	0.882188	0	-Inf	AT3G17225 (E=5e-044) | invertase/pectin methylesterase inhibitor family protein
Bra001660	A03:17732641-17733986	0.131327	0	-Inf	0.0847975	0	-Inf	AT3G17380 (E=4e-152) | meprin and TRAF homology domain-containing protein / MATH domain-containing protein
Bra001677	A03:17794621-17819630	0.058892	0	-Inf	0.0763762	0	-Inf	AT3G17650 (E=8e-128) YSL5, PDE321 | YSL5 (YELLOW STRIPE LIKE 5); oligopeptide transporter
Bra001678	A03:17823896-17832047	0.0531251	0	-Inf	0.145891	0	-Inf	AT3G17690 (E=9e-164) ATCNGC19, CNGC19 | ATCNGC19; calmodulin binding / cyclic nucleotide binding / ion channel
Bra001679	A03:17834052-17835174	0.288498	0	-Inf	0.156306	0	-Inf	AT3G17710 (E=2e-136) | F-box family protein
Bra001685	A03:17850205-17851131	7.34704	0	-Inf	2.40117	0	-Inf	AT4G30880 (E=3e-008) | protease inhibitor/seed storage/lipid transfer protein (LTP) family protein
Bra001696	A03:17907538-17909990	0.0243268	0	-Inf	0.0831575	0	-Inf	AT1G48620 (E=9e-020) HON5 | HON5 (High Mobility Group Family A 5); DNA binding
Bra001698	A03:17920102-17921695	2.8704	0	-Inf	2.43614	0	-Inf	AT1G48635 (E=4e-135) PEX3, PEX3-2 | peroxin-3 family protein
Bra001701	A03:17936224-17936515	55.9897	0	-Inf	29.956	0	-Inf	AT3G18280 (E=7e-020) | protease inhibitor/seed storage/lipid transfer protein (LTP) family protein
Bra001707	A03:17956491-17957991	2.00188	0	-Inf	0.793698	0	-Inf	AT3G18490 (E=4e-217) | aspartyl protease family protein
Bra001715	A03:18015537-18017402	7.72335	0	-Inf	7.97453	0	-Inf	AT3G18680 (E=1e-152) | aspartate/glutamate/uridylate kinase family protein
Bra001716	A03:18017654-18018299	2.41545	0	-Inf	5.14481	0	-Inf	AT3G18690 (E=2e-084) MKS1 | MKS1 (MAP kinase substrate 1); protein binding
Bra001717	A03:18019245-18020710	0.128502	0	-Inf	0.0825716	0	-Inf	AT3G18710 (E=7e-154) PUB29, ATPUB29 | PUB29 (PLANT U-BOX 29); ubiquitin-protein ligase
Bra001730	A03:18114561-18120053	0.018314	0	-Inf	0.0117913	0	-Inf	AT3G19020 (E=1e-205) | leucine-rich repeat family protein / extensin family protein
Bra001736	A03:18172965-18173708	2.76526	0	-Inf	3.89011	0	-Inf	AT3G19150 (E=9e-016) KRP6, ICK4 | KRP6 (KIP-RELATED PROTEIN 6); cyclin binding / cyclin-dependent protein kinase inhibitor
Bra001737	A03:18178109-18179443	0.0363179	0	-Inf	0.257438	0	-Inf	AT3G19160 (E=2e-122) ATIPT8, PGA22 | ATIPT8 (ATP/ADP ISOPENTENYLTRANSFERASES); adenylate dimethylallyltransferase
Bra001741	A03:18196627-18198822	0.0472693	0	-Inf	0.0455356	0	-Inf	AT3G19270 (E=4e-232) CYP707A4 | CYP707A4; (+)-abscisic acid 8'-hydroxylase/ oxygen binding
Bra001752	A03:18247424-18248228	1.02447	0	-Inf	2.87037	0	-Inf	AT3G19580 (E=7e-078) AZF2 | AZF2 (ARABIDOPSIS ZINC-FINGER PROTEIN 2); DNA binding / nucleic acid binding / transcription factor/ transcription repressor/ zinc ion binding
Bra001774	A03:18374640-18376492	0.608011	0	-Inf	0.377802	0	-Inf	AT3G20080 (E=3e-165) CYP705A15 | CYP705A15; electron carrier/ heme binding / iron ion binding / monooxygenase/ oxygen binding
Bra001776	A03:18388326-18394378	0.048544	0	-Inf	0.0143267	0	-Inf	AT3G20150 (E=0.0) | kinesin motor family protein
Bra001782	A03:18411988-18413396	0.0258562	0	-Inf	0.0498455	0	-Inf	AT3G20260 (E=3e-153) | structural constituent of ribosome
Bra001794	A03:18505585-18506282	0.877168	0	-Inf	1.54026	0	-Inf	AT3G20570 (E=1e-076) | plastocyanin-like domain-containing protein
Bra001796	A03:18512875-18513511	13.782	0	-Inf	10.788	0	-Inf	AT3G20600 (E=2e-091) NDR1 | NDR1 (non race-specific disease resistance 1); signal transducer
Bra001801	A03:18563158-18564239	0.0863109	0	-Inf	0.0563762	0	-Inf	AT3G20750 (E=3e-021) | zinc finger (GATA type) family protein
Bra001805	A03:18583236-18583650	1.04238	0	-Inf	2.2886	0	-Inf	AT3G20898 (E=2e-025) | unknown protein
Bra001812	A03:18605673-18607395	1.14206	0	-Inf	0.826764	0	-Inf	AT1G51540 (E=6e-202) | INVOLVED IN: biological_process unknown; LOCATED IN: Golgi apparatus; EXPRESSED IN: 22 plant structures; EXPRESSED DURING: 13 growth stages; CONTAINS InterPro DOMAIN/s: Galactose oxidase/kelch, beta-propeller (InterPro:IPR011043), Kelch repeat type 1 (InterPro:IPR006652), Kelch repeat type 2 (InterPro:IPR011498), Kelch related (InterPro:IPR013089), Kelch-type beta propeller…
Bra001813	A03:18607949-18609406	1.58816	0	-Inf	1.1017	0	-Inf	AT1G51550 (E=1e-176) | F-box family protein
Bra001815	A03:18615239-18615932	4.85786	0	-Inf	13.5721	0	-Inf	AT3G21150 (E=2e-065) | zinc finger (B-box type) family protein
Bra001824	A03:18672928-18673147	29.8461	0	-Inf	8.54651	0	-Inf	None
Bra001826	A03:18687478-18688453	0.128758	0	-Inf	0.189675	0	-Inf	AT3G21330 (E=1e-086) | basic helix-loop-helix (bHLH) family protein
Bra001828	A03:18704291-18705173	3.36613	0	-Inf	6.14501	0	-Inf	AT3G21400 (E=4e-084) | unknown protein
Bra001839	A03:18786976-18787927	0.0403005	0	-Inf	0.683347	0	-Inf	AT5G50840 (E=2e-046) | INVOLVED IN: biological_process unknown; EXPRESSED IN: 22 plant structures; EXPRESSED DURING: 13 growth stages; BEST Arabidopsis thaliana protein match is: myosin heavy chain-related (TAIR:AT5G59210.1); Has 48881 Blast hits to 26998 proteins in 1148 species: Archae - 400; Bacteria - 3488; Metazoa - 25141; Fungi - 2545; Plants - 1208; Viruses - 169; Other Eukaryotes - 15930 …
Bra001846	A03:18835452-18836886	10.3379	0	-Inf	5.98923	0	-Inf	AT3G21760 (E=5e-179) | UDP-glucoronosyl/UDP-glucosyl transferase family protein
Bra001847	A03:18843340-18844741	0.0228127	0	-Inf	0.0292948	0	-Inf	AT3G21790 (E=1e-197) | UDP-glucoronosyl/UDP-glucosyl transferase family protein
Bra001851	A03:18870866-18872302	0.0252592	0	-Inf	0.130716	0	-Inf	AT3G29040 (E=1e-059) | protein serine/threonine kinase
Bra001857	A03:18935929-18936337	29.4276	0	-Inf	82.4562	0	-Inf	AT4G15000 (E=2e-060) | 60S ribosomal protein L27 (RPL27C)
Bra001863	A03:19043168-19043917	0.684552	0	-Inf	1.77833	0	-Inf	AT3G22300 (E=2e-056) RPS10 | RPS10 (RIBOSOMAL PROTEIN S10); structural constituent of ribosome
Bra001885	A03:19137241-19139063	0.156964	0	-Inf	0.605622	0	-Inf	AT3G22830 (E=3e-136) AT-HSFA6B, HSFA6B | AT-HSFA6B; DNA binding / transcription factor
Bra001886	A03:19142815-19143921	0.124429	0	-Inf	9.74404	0	-Inf	AT3G22840 (E=1e-076) ELIP1, ELIP | ELIP1 (EARLY LIGHT-INDUCABLE PROTEIN); chlorophyll binding
Bra001889	A03:19148757-19149904	0.0543847	0	-Inf	0.140867	0	-Inf	AT3G22850 (E=4e-126) | unknown protein
Bra001897	A03:19213109-19214189	18.6095	0	-Inf	11.6811	0	-Inf	AT3G22970 (E=7e-119) | unknown protein
Bra001912	A03:19313943-19319107	0.519959	0	-Inf	0.488949	0	-Inf	AT3G23410 (E=0.0) | alcohol oxidase-related
Bra001922	A03:19353163-19353583	0.272368	0	-Inf	0.364758	0	-Inf	AT5G47320 (E=7e-042) RPS19 | RPS19 (RIBOSOMAL PROTEIN S19); RNA binding
Bra001938	A03:19471161-19471542	0.824061	0	-Inf	0.586995	0	-Inf	AT3G21890 (E=3e-008) | zinc finger (B-box type) family protein
Bra001944	A03:19504787-19508164	0.0131351	0	-Inf	0.0224055	0	-Inf	AT3G24340 (E=1e-302) chr40 | chr40 (chromatin remodeling 40); ATP binding / DNA binding / helicase/ nucleic acid binding
Bra001976	A10:12535868-12537491	0.0242393	0	-Inf	0.0311387	0	-Inf	AT2G16400 (E=7e-165) BLH7 | BLH7 (bell1-like homeodomain 7); DNA binding / transcription factor
Bra001992	A10:12427470-12430572	0.0090639	0	-Inf	0.017395	0	-Inf	AT3G11080 (E=1e-186) AtRLP35 | AtRLP35 (Receptor Like Protein 35); kinase/ protein binding
Bra002030	A10:12057324-12059538	0.171922	0	-Inf	0.287964	0	-Inf	AT2G17210 (E=2e-295) | pentatricopeptide (PPR) repeat-containing protein
Bra002038	A10:11984839-11986074	13.2593	0	-Inf	13.7226	0	-Inf	AT3G11410 (E=9e-152) ATPP2CA, AHG3, PP2CA | PP2CA (ARABIDOPSIS THALIANA PROTEIN PHOSPHATASE 2CA); protein binding / protein serine/threonine phosphatase
Bra002047	A10:11937539-11938652	4.80396	0	-Inf	5.88578	0	-Inf	AT2G17265 (E=1e-166) HSK | HSK (HOMOSERINE KINASE); homoserine kinase
Bra002053	A10:11911628-11913538	0.111517	0	-Inf	0.238404	0	-Inf	AT2G17370 (E=1e-206) HMG2, HMGR2 | HMG2 (3-HYDROXY-3-METHYLGLUTARYL-COA REDUCTASE 2); hydroxymethylglutaryl-CoA reductase
Bra002059	A10:11856387-11857680	0.609896	0	-Inf	0.116476	0	-Inf	AT2G21045 (E=2e-064) | INVOLVED IN: aging; EXPRESSED IN: hypocotyl, root; CONTAINS InterPro DOMAIN/s: Rhodanese-like (InterPro:IPR001763); BEST Arabidopsis thaliana protein match is: unknown protein (TAIR:AT5G66170.2); Has 1919 Blast hits to 1917 proteins in 542 species: Archae - 34; Bacteria - 1258; Metazoa - 17; Fungi - 21; Plants - 115; Viruses - 0; Other Eukaryotes - 474 (source: NCBI BLink).
Bra002069	A10:11744369-11746265	0.664715	0	-Inf	0.283999	0	-Inf	AT2G17525 (E=4e-287) | pentatricopeptide (PPR) repeat-containing protein
Bra002090	A10:11562509-11563064	0.0464454	0	-Inf	0.243129	0	-Inf	AT2G17770 (E=5e-019) ATBZIP27, FDP | ATBZIP27; transcription factor
Bra002091	A10:11554865-11556262	1.30066	0	-Inf	1.12758	0	-Inf	AT2G17787 (E=8e-049) | unknown protein
Bra002103	A10:11427537-11429171	1.15042	0	-Inf	2.59992	0	-Inf	AT5G17760 (E=7e-239) | AAA-type ATPase family protein
Bra002106	A10:11418037-11420605	0.758684	0	-Inf	0.499074	0	-Inf	AT5G17790 (E=9e-253) VAR3 | VAR3 (VARIEGATED 3); binding / zinc ion binding
Bra002107	A10:11410390-11412270	0.0551819	0	-Inf	0.189675	0	-Inf	AT5G17800 (E=2e-070) AtMYB56 | AtMYB56 (myb domain protein 56); DNA binding / transcription factor
Bra002111	A10:11392438-11392783	7.33073	0	-Inf	10.3966	0	-Inf	None
Bra002115	A10:11367879-11372413	0.181671	0	-Inf	0.206944	0	-Inf	AT5G17910 (E=5e-127) | unknown protein
Bra002118	A10:11350487-11353640	0.302703	0	-Inf	0.0878869	0	-Inf	AT5G17980 (E=0.0) | C2 domain-containing protein
Bra002120	A10:11346442-11346736	2.06015	0	-Inf	1.76098	0	-Inf	AT5G18080 (E=2e-036) | auxin-responsive protein, putative
Bra002121	A10:11345078-11345360	0.528122	0	-Inf	0.756451	0	-Inf	AT5G18080 (E=1e-036) | auxin-responsive protein, putative
Bra002124	A10:11340760-11341051	6.99872	0	-Inf	5.61675	0	-Inf	AT5G18080 (E=8e-037) | auxin-responsive protein, putative
Bra002129	A10:11328449-11336525	1.57251	0	-Inf	2.18629	0	-Inf	AT5G18070 (E=1e-239) DRT101 | DRT101 (DNA-DAMAGE-REPAIR/TOLERATION 101); intramolecular transferase, phosphotransferases / magnesium ion binding
Bra002134	A10:11318961-11320245	0.308329	0	-Inf	0.518118	0	-Inf	AT5G18110 (E=6e-082) NCBP | NCBP (NOVEL CAP-BINDING PROTEIN); RNA binding / translation initiation factor
Bra002142	A10:11291744-11292605	0.372271	0	-Inf	0.545713	0	-Inf	AT5G18210 (E=1e-107) | short-chain dehydrogenase/reductase (SDR) family protein
Bra002153	A10:11214192-11221776	0.0267775	0	-Inf	0.0042798	0	-Inf	AT5G18320 (E=4e-148) | armadillo/beta-catenin repeat family protein / U-box domain-containing protein
Bra002154	A10:11205115-11210095	0.0275209	0	-Inf	0.0981045	0	-Inf	AT5G18370 (E=4e-106) | disease resistance protein (TIR-NBS-LRR class), putative
Bra002165	A10:11155170-11157415	6.46262	0	-Inf	6.63838	0	-Inf	AT5G44630 (E=7e-239) | terpene synthase/cyclase family protein
Bra002167	A10:11128424-11130478	0.409255	0	-Inf	0.270879	0	-Inf	AT3G06410 (E=3e-129) | nucleic acid binding / zinc ion binding
Bra002177	A10:11074691-11078845	0.193523	0	-Inf	2.44618	0	-Inf	AT5G18660 (E=1e-192) PCB2 | PCB2 (PALE-GREEN AND CHLOROPHYLL B REDUCED 2); 3,8-divinyl protochlorophyllide a 8-vinyl reductase
Bra002181	A10:11048902-11054199	0.070291	0	-Inf	0.0042798	0	-Inf	AT5G18700 (E=0.0) EMB3013 | EMB3013 (embryo defective 3013); ATP binding / binding / kinase/ protein kinase/ protein serine/threonine kinase
Bra002184	A10:11037104-11037893	1.10486	0	-Inf	0.844584	0	-Inf	AT5G18750 (E=2e-102) | DNAJ heat shock N-terminal domain-containing protein
Bra002187	A10:11017180-11017546	0.288075	0	-Inf	0.591267	0	-Inf	None
Bra002194	A10:10972054-10973095	0.386388	0	-Inf	0.0432711	0	-Inf	AT5G18930 (E=1e-176) BUD2, SAMDC4 | BUD2 (BUSHY AND DWARF 2); adenosylmethionine decarboxylase
Bra002196	A10:10953617-10955126	0.353746	0	-Inf	0.814562	0	-Inf	AT5G18950 (E=2e-167) | pentatricopeptide (PPR) repeat-containing protein
Bra002206	A10:10906752-10908450	0.0450896	0	-Inf	0.0578277	0	-Inf	AT5G19060 (E=4e-269) | FUNCTIONS IN: molecular_function unknown; INVOLVED IN: biological_process unknown; LOCATED IN: cellular_component unknown; CONTAINS InterPro DOMAIN/s: Immunoglobulin-like fold (InterPro:IPR013783); BEST Arabidopsis thaliana protein match is: unknown protein (TAIR:AT3G06150.1); Has 19 Blast hits to 18 proteins in 6 species: Archae - 0; Bacteria - 0; Metazoa - 1; Fungi - 0; P…
Bra002218	A10:10822991-10824563	0.339466	0	-Inf	0.624793	0	-Inf	AT5G19160 (E=1e-221) | unknown protein
Bra002224	A10:10787801-10788809	9.07883	0	-Inf	12.6248	0	-Inf	AT5G19290 (E=1e-164) | esterase/lipase/thioesterase family protein
Bra002262	A10:10612336-10613101	0.13176	0	-Inf	0.204678	0	-Inf	AT5G19790 (E=4e-091) RAP2.11 | RAP2.11 (related to AP2 11); DNA binding / transcription factor
Bra002267	A10:10584296-10585662	0.0712992	0	-Inf	0.305273	0	-Inf	AT3G26010 (E=3e-100) | F-box family protein
Bra002278	A10:10546787-10547822	2.11662	0	-Inf	3.96923	0	-Inf	AT5G19980 (E=4e-147) | integral membrane family protein
Bra002305	A10:10394061-10397240	0.322454	0	-Inf	0.377696	0	-Inf	AT5G20480 (E=0.0) EFR | EFR (EF-TU RECEPTOR); ATP binding / kinase/ protein serine/threonine kinase
Bra002307	A10:10389024-10392420	2.49413	0	-Inf	4.23821	0	-Inf	AT5G20510 (E=3e-098) AL5 | AL5 (ALFIN-LIKE 5); DNA binding / methylated histone residue binding
Bra002319	A10:10329836-10330295	2.27963	0	-Inf	3.11758	0	-Inf	AT5G20670 (E=4e-058) | unknown protein
Bra002320	A10:10322289-10324663	0.282488	0	-Inf	0.2295	0	-Inf	AT5G20680 (E=2e-253) | unknown protein
Bra002321	A10:10318862-10321195	0.0460274	0	-Inf	0.0196626	0	-Inf	AT5G20690 (E=5e-264) | ATP binding / kinase/ protein serine/threonine kinase
Bra002324	A10:10308432-10310811	0.0212229	0	-Inf	0.0544835	0	-Inf	AT5G23580 (E=2e-228) CDPK9, ATCDPK9, CPK12, ATCPK12 | CDPK9 (CALMODULIN-LIKE DOMAIN PROTEIN KINASE 9); ATP binding / calcium ion binding / calmodulin-dependent protein kinase/ kinase/ protein kinase/ protein serine/threonine kinase
Bra002353	A10:10128831-10129918	0.923646	0	-Inf	0.387495	0	-Inf	AT5G21070 (E=6e-098) | unknown protein
Bra002396	A10:9844969-9845894	0.297129	0	-Inf	0.0967228	0	-Inf	AT5G22200 (E=2e-082) | harpin-induced family protein / HIN1 family protein / harpin-responsive family protein
Bra002404	A10:9813690-9815324	0.228528	0	-Inf	0.586763	0	-Inf	AT5G22310 (E=1e-147) | unknown protein
Bra002408	A10:9797093-9798099	0.089575	0	-Inf	0.0774508	0	-Inf	AT5G22380 (E=4e-112) anac090 | anac090 (Arabidopsis NAC domain containing protein 90); transcription factor
Bra002414	A10:9736804-9740410	0.00594819	0	-Inf	0.121857	0	-Inf	AT5G22470 (E=0.0) | NAD+ ADP-ribosyltransferase
Bra002428	A10:9622699-9624040	0.180767	0	-Inf	0.232212	0	-Inf	AT3G26010 (E=5e-100) | F-box family protein
Bra002436	A10:9599092-9599518	3.39799	0	-Inf	3.14485	0	-Inf	AT5G22880 (E=1e-046) H2B, HTB2 | HTB2; DNA binding
Bra002442	A10:9555137-9556768	0.659802	0	-Inf	0.277554	0	-Inf	AT5G22940 (E=1e-209) F8H | F8H (FRA8 HOMOLOG); catalytic
Bra002454	A10:9484897-9488290	0.0269511	0	-Inf	0.0949378	0	-Inf	AT5G60760 (E=0.0) | 2-phosphoglycerate kinase-related
Bra002455	A10:9468893-9473084	0.0858228	0	-Inf	0.0110043	0	-Inf	AT5G60720 (E=2e-162) | unknown protein
Bra002459	A10:9416311-9416794	22.6309	0	-Inf	19.0898	0	-Inf	AT5G60680 (E=6e-061) | unknown protein
Bra002463	A10:9383266-9383710	0.0776914	0	-Inf	0.103373	0	-Inf	AT5G60650 (E=9e-036) | unknown protein
Bra002478	A10:9310001-9310331	3.36254	0	-Inf	13.4528	0	-Inf	AT5G60460 (E=8e-026) | sec61beta family protein
Bra002492	A10:9247386-9248301	0.0805236	0	-Inf	0.0259725	0	-Inf	AT5G60300 (E=7e-106) | lectin protein kinase family protein
Bra002494	A10:9237761-9239816	0.0455036	0	-Inf	0.189905	0	-Inf	AT5G60300 (E=7e-089) | lectin protein kinase family protein
Bra002515	A10:9111832-9114109	0.0266036	0	-Inf	0.0119545	0	-Inf	AT5G60020 (E=3e-301) LAC17, ATLAC17 | LAC17 (laccase 17); laccase
Bra002520	A10:9069566-9070019	42.3709	0	-Inf	50.7817	0	-Inf	AT5G22880 (E=2e-045) H2B, HTB2 | HTB2; DNA binding
Bra002521	A10:9066397-9069094	0.576742	0	-Inf	0.690795	0	-Inf	AT5G59900 (E=0.0) | pentatricopeptide (PPR) repeat-containing protein
Bra002528	A10:9046550-9047033	3.4575	0	-Inf	7.63594	0	-Inf	AT5G59820 (E=5e-070) RHL41, ZAT12 | RHL41 (RESPONSIVE TO HIGH LIGHT 41); nucleic acid binding / transcription factor/ zinc ion binding
Bra002535	A10:8996252-8996936	0.0316304	0	-Inf	0.164252	0	-Inf	AT5G59760 (E=2e-073) | unknown protein
Bra002537	A10:8985716-8987603	6.64458	0	-Inf	5.56912	0	-Inf	AT5G59730 (E=2e-262) ATEXO70H7 | ATEXO70H7 (EXOCYST SUBUNIT EXO70 FAMILY PROTEIN H7); protein binding
Bra002550	A10:8908361-8909462	0.295874	0	-Inf	0.300629	0	-Inf	AT5G60110 (E=3e-065) APUM18 | APUM18 (Arabidopsis Pumilio 18); RNA binding / binding
Bra002555	A10:8895135-8896740	0.559741	0	-Inf	0.520013	0	-Inf	AT5G59600 (E=9e-244) | pentatricopeptide (PPR) repeat-containing protein
Bra002564	A10:8854909-8858390	2.29664	0	-Inf	7.04298	0	-Inf	AT5G59450 (E=1e-168) | scarecrow-like transcription factor 11 (SCL11)
Bra002572	A10:8812542-8813019	0.453381	0	-Inf	0.256803	0	-Inf	AT5G59360 (E=8e-025) | unknown protein
Bra002574	A10:8803740-8804562	0.188661	0	-Inf	0.304825	0	-Inf	AT5G59350 (E=6e-064) | unknown protein
Bra002594	A10:8692934-8694778	0.813275	0	-Inf	0.908337	0	-Inf	AT5G59220 (E=5e-154) | protein phosphatase 2C, putative / PP2C, putative
Bra002610	A10:8565093-8566325	0.214473	0	-Inf	0.166143	0	-Inf	AT5G58900 (E=2e-140) | myb family transcription factor
Bra002629	A10:8485801-8487708	18.8686	0	-Inf	19.3161	0	-Inf	AT5G58650 (E=3e-011) PSY1 | PSY1 (plant peptide containing sulfated tyrosine 1)
Bra002636	A10:8447624-8448569	0.211456	0	-Inf	0.39663	0	-Inf	AT5G58580 (E=4e-036) ATL63 | ATL63 (ARABIDOPSIS TO&#769;XICOS EN LEVADURA); protein binding / zinc ion binding
Bra002640	A10:8431127-8431484	0.794275	0	-Inf	0.6551	0	-Inf	AT5G58530 (E=4e-051) | glutaredoxin family protein
Bra002644	A10:8409931-8410495	0.089952	0	-Inf	0.117625	0	-Inf	AT5G58500 (E=2e-064) LSH5 | LSH5 (LIGHT SENSITIVE HYPOCOTYLS 5)
Bra002646	A10:8405526-8407078	0.320495	0	-Inf	0.255404	0	-Inf	AT5G58480 (E=7e-227) | glycosyl hydrolase family 17 protein
Bra002661	A10:8354632-8359067	0.490515	0	-Inf	0.289419	0	-Inf	AT5G58320 (E=3e-207) | kinase interacting protein-related
Bra002665	A10:8335928-8336732	17.9378	0	-Inf	21.7166	0	-Inf	AT5G58250 (E=1e-086) | unknown protein
Bra002673	A10:8303015-8305142	3.47428	0	-Inf	3.35949	0	-Inf	AT5G58090 (E=9e-251) | glycosyl hydrolase family 17 protein
Bra002674	A10:8300118-8300532	24.1642	0	-Inf	45.1363	0	-Inf	AT5G58070 (E=2e-054) ATTIL, TIL | TIL (TEMPERATURE-INDUCED LIPOCALIN); binding / transporter
Bra002685	A10:8241804-8242938	6.28258	0	-Inf	4.31951	0	-Inf	AT5G57910 (E=2e-050) | unknown protein
Bra002687	A10:8235653-8241552	0.121451	0	-Inf	0.120348	0	-Inf	AT5G57880 (E=1e-101) | unknown protein
Bra002703	A10:8147866-8150974	5.55795	0	-Inf	3.00848	0	-Inf	AT5G57710 (E=0.0) | heat shock protein-related
Bra002708	A10:8097827-8100665	0.0437929	0	-Inf	0.0112314	0	-Inf	AT5G57670 (E=2e-280) | protein kinase family protein
Bra002727	A10:7983167-7985090	0.661577	0	-Inf	0.568603	0	-Inf	AT5G57460 (E=2e-299) | unknown protein
Bra002739	A10:7918549-7918810	2.5964	0	-Inf	2.49134	0	-Inf	AT3G54080 (E=1e-018) | sugar binding
Bra002745	A10:7902276-7907176	0.524389	0	-Inf	0.59686	0	-Inf	AT5G57240 (E=5e-177) ORP4C | ORP4C (OSBP(OXYSTEROL BINDING PROTEIN)-RELATED PROTEIN 4C); oxysterol binding
Bra002754	A10:7847562-7850310	0.228049	0	-Inf	0.162436	0	-Inf	AT1G70980 (E=3e-096) SYNC3 | SYNC3; ATP binding / aminoacyl-tRNA ligase/ asparagine-tRNA ligase/ aspartate-tRNA ligase/ nucleic acid binding / nucleotide binding
Bra002758	A10:7829381-7832688	0.277189	0	-Inf	0.0484063	0	-Inf	AT5G57130 (E=6e-305) | protein binding
Bra002764	A10:7740739-7742458	0.630932	0	-Inf	0.752136	0	-Inf	AT5G57070 (E=9e-163) | hydroxyproline-rich glycoprotein family protein
Bra002768	A10:7718761-7722244	0.0192984	0	-Inf	0.0659097	0	-Inf	AT5G57035 (E=2e-241) | ATP binding / kinase/ protein kinase/ protein serine/threonine kinase/ ubiquitin-protein ligase
Bra002773	A10:7703174-7705246	0.113068	0	-Inf	0.118725	0	-Inf	AT5G57010 (E=2e-203) | calmodulin-binding family protein
Bra002775	A10:7669693-7670815	0.668102	0	-Inf	0.33215	0	-Inf	AT5G56980 (E=2e-146) | unknown protein
Bra002779	A10:7632369-7633426	3.26882	0	-Inf	7.79795	0	-Inf	AT5G56940 (E=2e-065) | ribosomal protein S16 family protein
Bra002787	A10:7579261-7579627	0.144037	0	-Inf	0.197089	0	-Inf	None
Bra002792	A10:7524303-7526310	2.22221	0	-Inf	2.44485	0	-Inf	AT5G56780 (E=2e-223) | unknown protein
Bra002793	A10:7523089-7524106	0.316124	0	-Inf	0.611662	0	-Inf	AT5G56760 (E=7e-128) ATSERAT1;1, SAT5, SAT-52 | ATSERAT1;1 (ARABIDOPSIS THALIANA SERINE ACETYLTRANSFERASE 1;1); serine O-acetyltransferase
Bra002797	A10:7508023-7509249	0.167025	0	-Inf	0.234459	0	-Inf	AT5G56720 (E=4e-164) | malate dehydrogenase, cytosolic, putative
Bra002800	A10:7499874-7501546	1.45436	0	-Inf	1.18327	0	-Inf	AT5G56660 (E=2e-188) ILL2 | ILL2; IAA-Ala conjugate hydrolase/ IAA-amino acid conjugate hydrolase/ metallopeptidase
Bra002811	A10:7428927-7429227	1.46881	0	-Inf	0.521506	0	-Inf	AT5G56520 (E=8e-039) | unknown protein
Bra002816	A10:7391155-7392127	1.42247	0	-Inf	1.40497	0	-Inf	AT5G56450 (E=5e-162) | mitochondrial substrate carrier family protein
Bra002833	A10:7248428-7249440	0.970108	0	-Inf	0.849072	0	-Inf	AT5G56230 (E=1e-065) PRA1.G2 | PRA1.G2 (PRENYLATED RAB ACCEPTOR 1.G2)
Bra002834	A10:7244519-7247438	0.324693	0	-Inf	0.142632	0	-Inf	AT5G56220 (E=0.0) | nucleoside-triphosphatase/ nucleotide binding
Bra002835	A10:7240155-7241095	1.57744	0	-Inf	1.19915	0	-Inf	AT5G56210 (E=3e-072) WIP2 | WIP2 (WPP-domain Interacting Protein 2); protein heterodimerization/ protein homodimerization
Bra002836	A10:7237129-7238527	0.0914954	0	-Inf	0.0881216	0	-Inf	AT5G56200 (E=3e-060) | zinc finger (C2H2 type) family protein
Bra002853	A10:7154220-7155066	0.271	0	-Inf	0.1167	0	-Inf	AT5G56050 (E=9e-098) | FUNCTIONS IN: molecular_function unknown; INVOLVED IN: biological_process unknown; LOCATED IN: chloroplast; CONTAINS InterPro DOMAIN/s: Harpin-induced 1 (InterPro:IPR010847); BEST Arabidopsis thaliana protein match is: unknown protein (TAIR:AT4G26490.1); Has 322 Blast hits to 322 proteins in 28 species: Archae - 0; Bacteria - 8; Metazoa - 10; Fungi - 1; Plants - 299; Viruse…
Bra002877	A10:7012960-7015435	2.04502	0	-Inf	0.701191	0	-Inf	AT5G55740 (E=0.0) CRR21 | CRR21 (chlororespiratory reduction 21)
Bra002880	A10:6998207-7002504	2.45514	0	-Inf	3.47478	0	-Inf	AT5G55660 (E=4e-161) | LOCATED IN: mitochondrion; EXPRESSED IN: 24 plant structures; EXPRESSED DURING: 13 growth stages; CONTAINS InterPro DOMAIN/s: DEK, C-terminal (InterPro:IPR014876); BEST Arabidopsis thaliana protein match is: unknown protein (TAIR:AT4G26630.2); Has 348612 Blast hits to 121147 proteins in 2910 species: Archae - 1231; Bacteria - 38190; Metazoa - 148268; Fungi - 42547; Plants -…
Bra002882	A10:6983827-6984292	0.0689443	0	-Inf	5.29658	0	-Inf	AT1G77570 (E=5e-017) | DNA binding / transcription factor
Bra002886	A10:6964569-6964875	28.3061	0	-Inf	59.6366	0	-Inf	AT5G55620 (E=5e-038) | unknown protein
Bra002887	A10:6960023-6961205	0.864647	0	-Inf	1.6224	0	-Inf	AT5G62510 (E=5e-079) | F-box family protein
Bra002896	A10:6894930-6896187	0.314084	0	-Inf	0.841029	0	-Inf	AT5G66330 (E=6e-192) | leucine-rich repeat family protein
Bra002897	A10:6889401-6890325	0.0198497	0	-Inf	0.0256058	0	-Inf	AT5G55560 (E=6e-143) | protein kinase family protein
Bra002898	A10:6877678-6881871	0.189747	0	-Inf	0.174511	0	-Inf	AT5G55540 (E=0.0) TRN1, LOP1 | TRN1 (TORNADO 1)
Bra002902	A10:6861893-6865911	1.05872	0	-Inf	0.657015	0	-Inf	AT5G55500 (E=4e-049) ATXYLT, XYLT | XYLT (ARABIDOPSIS THALIANA BETA-1,2-XYLOSYLTRANSFERASE); xylosyltransferase
Bra002908	A10:6835159-6840036	0.073696	0	-Inf	0.00856634	0	-Inf	AT1G34355 (E=3e-155) | forkhead-associated domain-containing protein / FHA domain-containing protein
Bra002910	A10:6811169-6812189	0.017276	0	-Inf	0.0445098	0	-Inf	AT5G55350 (E=8e-141) | membrane bound O-acyl transferase (MBOAT) family protein / wax synthase-related
Bra002911	A10:6806296-6806836	0.0491196	0	-Inf	0.0643753	0	-Inf	AT5G55360 (E=4e-071) | long-chain-alcohol O-fatty-acyltransferase family protein / wax synthase family protein
Bra002933	A10:6653320-6654646	0.0122239	0	-Inf	0.0314083	0	-Inf	AT5G55090 (E=2e-169) MAPKKK15 | MAPKKK15; ATP binding / kinase/ protein kinase/ protein serine/threonine kinase
Bra002938	A10:6609571-6611523	0.0353246	0	-Inf	0.0226497	0	-Inf	AT5G55020 (E=4e-146) ATMYB120, MYB120 | MYB120 (MYB DOMAIN PROTEIN 120); DNA binding / transcription factor
Bra002960	A10:6445560-6448409	1.76119	0	-Inf	2.23895	0	-Inf	AT5G54730 (E=5e-224) ATATG18F, ATG18F | AtATG18f
Bra002980	A10:6312554-6314026	2.05964	0	-Inf	0.540559	0	-Inf	AT5G54530 (E=2e-053) | unknown protein
Bra002984	A10:6287791-6288187	16.0172	0	-Inf	35.1643	0	-Inf	AT4G27280 (E=6e-051) | calcium-binding EF hand family protein
Bra002987	A10:6269223-6270321	0.0625177	0	-Inf	0.020116	0	-Inf	AT5G55270 (E=5e-129) | unknown protein
Bra002992	A10:6225372-6226913	1.70972	0	-Inf	2.95918	0	-Inf	AT5G54390 (E=1e-174) AHL, ATAHL | AHL (ARABIDOPSIS HAL2-LIKE); 3'(2'),5'-bisphosphate nucleotidase/ inositol or phosphatidylinositol phosphatase
Bra003008	A10:6095464-6096064	0.111728	0	-Inf	0.151045	0	-Inf	AT5G54150 (E=1e-055) | unknown protein
Bra003011	A10:6065369-6066957	3.20748	0	-Inf	4.71368	0	-Inf	AT4G14190 (E=9e-193) | FUNCTIONS IN: molecular_function unknown; INVOLVED IN: biological_process unknown; LOCATED IN: chloroplast; EXPRESSED IN: 21 plant structures; EXPRESSED DURING: 13 growth stages; CONTAINS InterPro DOMAIN/s: Pentatricopeptide repeat (InterPro:IPR002885); BEST Arabidopsis thaliana protein match is: pentatricopeptide (PPR) repeat-containing protein (TAIR:AT3G42630.1); Has 7409…
Bra003012	A10:6062671-6064120	0.0126971	0	-Inf	0.114214	0	-Inf	AT5G54140 (E=1e-189) ILL3 | ILL3; IAA-amino acid conjugate hydrolase/ metallopeptidase
Bra003021	A10:5997899-5999389	0.0358905	0	-Inf	0.140104	0	-Inf	AT5G54060 (E=6e-081) UF3GT | UF3GT (udp-glucose:flavonoid 3-O-glucosyltransferase); transferase, transferring glycosyl groups
Bra003027	A10:5925759-5926724	0.0211285	0	-Inf	0.218193	0	-Inf	AT5G53870 (E=2e-073) | plastocyanin-like domain-containing protein
Bra003044	A10:5777224-5777835	4.05287	0	-Inf	4.99011	0	-Inf	AT5G53590 (E=1e-037) | auxin-responsive family protein
Bra003050	A10:5685742-5688948	0.0133699	0	-Inf	0.0085628	0	-Inf	AT5G53510 (E=0.0) ATOPT9, OPT9 | ATOPT9 (ARABIDOPSIS THALIANA OLIGOPEPTIDE TRANSPORTER 9); oligopeptide transporter
Bra003065	A10:5517400-5518665	3.90605	0	-Inf	3.36992	0	-Inf	AT5G53330 (E=2e-076) | FUNCTIONS IN: molecular_function unknown; INVOLVED IN: biological_process unknown; LOCATED IN: cellular_component unknown; EXPRESSED IN: 21 plant structures; EXPRESSED DURING: 13 growth stages; CONTAINS InterPro DOMAIN/s: Ubiquitin-associated/translation elongation factor EF1B, N-terminal, eukaryote (InterPro:IPR015940); Has 28 Blast hits to 28 proteins in 11 species: Archa…
Bra003094	A10:5254900-5260885	0.0107239	0	-Inf	0.275416	0	-Inf	AT5G52950 (E=2e-160) | unknown protein
Bra003114	A10:5024023-5024594	0.272368	0	-Inf	0.121586	0	-Inf	AT5G52750 (E=2e-039) | heavy-metal-associated domain-containing protein
Bra003115	A10:5015756-5016327	13.2553	0	-Inf	16.4141	0	-Inf	AT5G52750 (E=7e-040) | heavy-metal-associated domain-containing protein
Bra003126	A07:11474712-11477414	0.762855	0	-Inf	0.639672	0	-Inf	AT3G53260 (E=0.0) PAL2, ATPAL2 | PAL2; phenylalanine ammonia-lyase
Bra003130	A07:11508015-11509266	0.0670399	0	-Inf	0.115462	0	-Inf	AT3G53310 (E=3e-079) | transcriptional factor B3 family protein
Bra003143	A07:11554910-11560036	0.438357	0	-Inf	0.150304	0	-Inf	AT3G53540 (E=1e-211) | unknown protein
Bra003145	A07:11568935-11569922	1.88052	0	-Inf	2.35362	0	-Inf	AT3G53560 (E=4e-123) | chloroplast lumen common family protein
Bra003150	A07:11586643-11587060	8.16063	0	-Inf	10.0688	0	-Inf	AT2G37470 (E=2e-043) | histone H2B, putative
Bra003157	A07:11616154-11616783	0.0689443	0	-Inf	0.0913203	0	-Inf	AT3G53850 (E=8e-064) | FUNCTIONS IN: molecular_function unknown; INVOLVED IN: biological_process unknown; LOCATED IN: endomembrane system; CONTAINS InterPro DOMAIN/s: Uncharacterised protein family UPF0497, trans-membrane plant (InterPro:IPR006702); BEST Arabidopsis thaliana protein match is: integral membrane protein, putative (TAIR:AT5G02060.1); Has 100 Blast hits to 100 proteins in 8 species: …
Bra003169	A07:11671746-11672769	0.206475	0	-Inf	0.221643	0	-Inf	AT3G54080 (E=8e-069) | sugar binding
Bra003175	A07:11694770-11695971	0.0820737	0	-Inf	0.0529559	0	-Inf	AT3G54200 (E=2e-053) | FUNCTIONS IN: molecular_function unknown; INVOLVED IN: biological_process unknown; LOCATED IN: anchored to plasma membrane, plasma membrane; EXPRESSED IN: 23 plant structures; EXPRESSED DURING: 14 growth stages; CONTAINS InterPro DOMAIN/s: Harpin-induced 1 (InterPro:IPR010847); BEST Arabidopsis thaliana protein match is: unknown protein (TAIR:AT3G05975.1); Has 405 Blast hit…
Bra003184	A07:11727964-11737046	0.20545	0	-Inf	0.108675	0	-Inf	AT5G67150 (E=6e-179) | transferase family protein
Bra003194	A07:11791312-11792347	0.830345	0	-Inf	0.522959	0	-Inf	AT3G54810 (E=4e-118) BME3-ZF, BME3 | zinc finger (GATA type) family protein
Bra003199	A07:11823792-11824338	135.543	0	-Inf	169.107	0	-Inf	AT3G54900 (E=4e-066) CXIP1, ATGRXCP | CXIP1 (CAX INTERACTING PROTEIN 1); antiporter/ glutathione disulfide oxidoreductase
Bra003202	A07:11845175-11846921	0.555457	0	-Inf	1.28371	0	-Inf	AT3G54950 (E=7e-229) PLP7, PLA IIIA | PLA IIIA (PATATIN-LIKE PROTEIN 6)
Bra003209	A07:11893718-11895747	1.42337	0	-Inf	2.01209	0	-Inf	AT3G55120 (E=2e-090) TT5, A11, CFI | TT5 (TRANSPARENT TESTA 5); chalcone isomerase
Bra003212	A07:11909012-11910901	1.72077	0	-Inf	1.70063	0	-Inf	AT3G55430 (E=7e-224) | glycosyl hydrolase family 17 protein / beta-1,3-glucanase, putative
Bra003213	A07:11916794-11926306	0.0207041	0	-Inf	0.00884103	0	-Inf	AT5G17320 (E=1e-232) HDG9 | HDG9 (HOMEODOMAIN GLABROUS 9); DNA binding / sequence-specific DNA binding / transcription factor
Bra003219	A07:11963672-11964797	0.29876	0	-Inf	0.358155	0	-Inf	AT3G55690 (E=6e-052) | unknown protein
Bra003225	A07:12015003-12017166	0.176825	0	-Inf	0.0709455	0	-Inf	AT3G55990 (E=5e-238) ESK1 | ESK1 (ESKIMO 1)
Bra003226	A07:12018581-12019974	13.089	0	-Inf	14.5578	0	-Inf	AT3G56090 (E=6e-100) ATFER3 | ATFER3 (ferritin 3); binding / ferric iron binding / oxidoreductase/ transition metal ion binding
Bra003228	A07:12032061-12032697	10.2647	0	-Inf	15.9719	0	-Inf	AT3G56110 (E=3e-073) PRA1.B1 | PRA1.B1 (PRENYLATED RAB ACCEPTOR 1.B1)
Bra003240	A07:12103928-12108529	0.253752	0	-Inf	0.621126	0	-Inf	AT3G56410 (E=1e-134) | unknown protein
Bra003242	A07:12113309-12115686	0.117604	0	-Inf	0.0548957	0	-Inf	AT3G56480 (E=6e-247) | myosin heavy chain-related
Bra003245	A07:12129752-12131536	0.060307	0	-Inf	0.252186	0	-Inf	AT3G56620 (E=1e-149) | integral membrane family protein / nodulin MtN21-related
Bra003248	A07:12162078-12164681	0.102672	0	-Inf	0.143672	0	-Inf	AT3G56700 (E=4e-126) FAR6 | FAR6 (FATTY ACID REDUCTASE 6); fatty acyl-CoA reductase (alcohol-forming)/ oxidoreductase, acting on the CH-CH group of donors, NAD or NADP as acceptor
Bra003252	A07:12197640-12199342	0.304824	0	-Inf	0.0245655	0	-Inf	AT3G56810 (E=4e-104) | unknown protein
Bra003263	A07:12258869-12260797	0.475791	0	-Inf	0.138257	0	-Inf	AT3G57020 (E=5e-184) | strictosidine synthase family protein
Bra003280	A07:12348351-12351058	0.598674	0	-Inf	0.467964	0	-Inf	AT3G57400 (E=2e-147) | unknown protein
Bra003283	A07:12375508-12375790	11.0906	0	-Inf	13.6161	0	-Inf	AT3G57450 (E=1e-021) | unknown protein
Bra003285	A07:12381355-12381745	1.03168	0	-Inf	0.155157	0	-Inf	AT3G57500 (E=1e-039) | unknown protein
Bra003298	A07:12468807-12469524	2.31027	0	-Inf	3.37452	0	-Inf	AT3G57750 (E=6e-116) | protein kinase, putative
Bra003299	A07:12471362-12472472	0.677757	0	-Inf	0.297343	0	-Inf	AT3G57760 (E=1e-173) | protein kinase family protein
Bra003308	A07:12516409-12517607	0.249157	0	-Inf	0.160335	0	-Inf	AT1G09650 (E=2e-055) | F-box family protein
Bra003318	A07:12578502-12579348	4.27417	0	-Inf	5.54683	0	-Inf	AT3G58100 (E=1e-064) PDCB5 | PDCB5 (PLASMODESMATA CALLOSE-BINDING PROTEIN 5); callose binding / polysaccharide binding
Bra003332	A07:12634562-12637221	1.03866	0	-Inf	0.556907	0	-Inf	AT3G58320 (E=9e-047) | FUNCTIONS IN: molecular_function unknown; INVOLVED IN: biological_process unknown; LOCATED IN: cellular_component unknown; BEST Arabidopsis thaliana protein match is: meprin and TRAF homology domain-containing protein / MATH domain-containing protein (TAIR:AT3G58270.2); Has 134 Blast hits to 120 proteins in 3 species: Archae - 0; Bacteria - 2; Metazoa - 0; Fungi - 0; Plants…
Bra003349	A07:12748817-12751462	3.25783	0	-Inf	4.45515	0	-Inf	AT3G58660 (E=2e-125) | 60S ribosomal protein-related
Bra003350	A07:12752104-12753547	0.144655	0	-Inf	0.0932128	0	-Inf	AT3G58690 (E=7e-095) | protein kinase family protein
Bra003351	A07:12753867-12754823	0.0757775	0	-Inf	0.653582	0	-Inf	AT3G58720 (E=4e-081) | zinc finger (C3HC4-type RING finger) family protein
Bra003359	A07:12802595-12803387	0.449341	0	-Inf	0.904155	0	-Inf	AT3G58840 (E=3e-021) | LOCATED IN: mitochondrion, plastid; EXPRESSED IN: 21 plant structures; EXPRESSED DURING: 9 growth stages; BEST Arabidopsis thaliana protein match is: myosin heavy chain-related (TAIR:AT1G06530.1); Has 122842 Blast hits to 54311 proteins in 2061 species: Archae - 1832; Bacteria - 13809; Metazoa - 62057; Fungi - 8845; Plants - 4054; Viruses - 676; Other Eukaryotes - 31569 (so…
Bra003363	A07:12832615-12834265	0.438688	0	-Inf	0.610606	0	-Inf	AT3G59080 (E=1e-230) | aspartyl protease family protein
Bra003378	A07:12914829-12916136	0.0547098	0	-Inf	0.0235045	0	-Inf	AT3G59480 (E=1e-166) | pfkB-type carbohydrate kinase family protein
Bra003393	A07:12989472-12989754	20.5967	0	-Inf	49.9257	0	-Inf	AT3G59840 (E=1e-035) | unknown protein
Bra003412	A07:13083091-13084416	0.144697	0	-Inf	0.124724	0	-Inf	AT3G60440 (E=1e-114) | LOCATED IN: chloroplast; EXPRESSED IN: 19 plant structures; EXPRESSED DURING: 13 growth stages; CONTAINS InterPro DOMAIN/s: Phosphoglycerate mutase (InterPro:IPR013078), PRIB5 (InterPro:IPR012398); BEST Arabidopsis thaliana protein match is: unknown protein (TAIR:AT3G60450.1); Has 180 Blast hits to 178 proteins in 74 species: Archae - 0; Bacteria - 37; Metazoa - 8; Fungi - …
Bra003422	A07:13133122-13134016	0.020819	0	-Inf	0.214961	0	-Inf	AT3G60580 (E=4e-090) | zinc finger (C2H2 type) family protein
Bra003426	A07:13146714-13149975	0.080708	0	-Inf	0.0296137	0	-Inf	AT3G60750 (E=4e-140) | transketolase, putative
Bra003452	A07:13270756-13273414	0.102995	0	-Inf	0.493129	0	-Inf	AT3G61520 (E=0.0) | pentatricopeptide (PPR) repeat-containing protein
Bra003456	A07:13287011-13290854	0.0471645	0	-Inf	0.0517842	0	-Inf	AT3G61570 (E=1e-277) GC3, GDAP1 | GDAP1 (GRIP-RELATED ARF-BINDING DOMAIN-CONTAINING ARABIDOPSIS PROTEIN 1); protein binding
Bra003457	A07:13292501-13293851	6.82334	0	-Inf	6.20131	0	-Inf	AT3G61580 (E=7e-250) | delta-8 sphingolipid desaturase (SLD1)
Bra003462	A07:13316598-13317450	0.245813	0	-Inf	1.47214	0	-Inf	AT2G46310 (E=1e-060) CRF5 | CRF5 (CYTOKININ RESPONSE FACTOR 5); DNA binding / transcription factor
Bra003468	A07:13357470-13359360	0.607447	0	-Inf	0.0930156	0	-Inf	AT3G61750 (E=6e-186) | auxin-responsive protein -related
Bra003482	A07:13420722-13421583	3.1901	0	-Inf	2.955	0	-Inf	AT3G61970 (E=3e-113) NGA2 | NGA2 (NGATHA2); transcription factor
Bra003484	A07:13437751-13438756	0.10685	0	-Inf	0.210544	0	-Inf	AT3G62100 (E=3e-067) IAA30 | IAA30 (INDOLE-3-ACETIC ACID INDUCIBLE 30); transcription factor
Bra003496	A07:13483273-13485143	0.0100369	0	-Inf	0.0515177	0	-Inf	AT3G62300 (E=9e-092) | agenet domain-containing protein
Bra003502	A07:13500425-13502485	5.84884	0	-Inf	11.2046	0	-Inf	AT3G62630 (E=4e-144) | FUNCTIONS IN: molecular_function unknown; INVOLVED IN: biological_process unknown; LOCATED IN: cellular_component unknown; EXPRESSED IN: 22 plant structures; EXPRESSED DURING: 14 growth stages; CONTAINS InterPro DOMAIN/s: Protein of unknown function DUF1645 (InterPro:IPR012442); BEST Arabidopsis thaliana protein match is: calmodulin-binding protein (TAIR:AT2G15760.1); Has 2…
Bra003503	A07:13504359-13505766	63.1511	0	-Inf	100.869	0	-Inf	AT3G62650 (E=5e-053) | unknown protein
Bra003504	A07:13508403-13509465	10.2669	0	-Inf	33.7006	0	-Inf	AT3G62660 (E=2e-176) GATL7 | GATL7 (Galacturonosyltransferase-like 7); polygalacturonate 4-alpha-galacturonosyltransferase/ transferase, transferring glycosyl groups / transferase, transferring hexosyl groups
Bra003507	A07:13516052-13516763	0.711616	0	-Inf	0.692132	0	-Inf	AT3G62690 (E=2e-084) ATL5 | ATL5 (ATL5); protein binding / zinc ion binding
Bra003511	A07:13529746-13532243	0.525455	0	-Inf	3.29543	0	-Inf	AT3G62830 (E=7e-234) UXS2, ATUXS2, AUD1 | AUD1; UDP-glucuronate decarboxylase/ catalytic/ dTDP-glucose 4,6-dehydratase
Bra003520	A07:13586690-13587926	0.0802052	0	-Inf	0.309755	0	-Inf	AT3G63010 (E=4e-190) ATGID1B, GID1B | GID1B (GA INSENSITIVE DWARF1B); hydrolase
Bra003528	A07:13644379-13645670	0.459288	0	-Inf	0.0740308	0	-Inf	AT1G79760 (E=3e-109) DTA4 | DTA4 (DOWNSTREAM TARGET OF AGL15-4)
Bra003531	A07:13649411-13650542	5.42851	0	-Inf	7.77778	0	-Inf	AT1G79790 (E=5e-105) | haloacid dehalogenase-like hydrolase family protein
Bra003537	A07:13681780-13683155	14.1738	0	-Inf	25.0909	0	-Inf	AT1G79870 (E=1e-140) | oxidoreductase family protein
Bra003549	A07:13739283-13740777	0.347583	0	-Inf	0.337984	0	-Inf	AT1G80080 (E=2e-207) TMM, AtRLP17 | TMM (TOO MANY MOUTHS); protein binding / receptor
Bra003559	A07:13778649-13785715	2.7654	0	-Inf	7.09398	0	-Inf	AT1G80270 (E=4e-257) | DNA-binding protein, putative
Bra003568	A07:13830003-13831779	0.0341915	0	-Inf	0.0657596	0	-Inf	AT5G51280 (E=7e-280) | DEAD-box protein abstrakt, putative
Bra003570	A07:13846412-13847798	0.0578049	0	-Inf	0.0742361	0	-Inf	AT1G80510 (E=4e-158) | amino acid transporter family protein
Bra003571	A07:13849737-13850301	0.584688	0	-Inf	0.823375	0	-Inf	AT1G80520 (E=4e-077) | FUNCTIONS IN: molecular_function unknown; INVOLVED IN: biological_process unknown; LOCATED IN: cellular_component unknown; EXPRESSED IN: 16 plant structures; EXPRESSED DURING: 4 anthesis, C globular stage, 4 leaf senescence stage, petal differentiation and expansion stage, D bilateral stage; CONTAINS InterPro DOMAIN/s: Sterile alpha motif homology (InterPro:IPR010993); BEST…
Bra003572	A07:13850981-13853095	1.38514	0	-Inf	2.01192	0	-Inf	AT1G80530 (E=9e-263) | nodulin family protein
Bra003582	A07:13918180-13918831	0.172205	0	-Inf	0.35824	0	-Inf	AT1G80730 (E=6e-085) ZFP1, ATZFP1 | ZFP1 (ZINC-FINGER PROTEIN 1); nucleic acid binding / transcription factor/ zinc ion binding
Bra003588	A07:13951931-13953469	0.166552	0	-Inf	0.107481	0	-Inf	AT1G80840 (E=6e-135) WRKY40, ATWRKY40 | WRKY40; transcription factor
Bra003589	A07:13953671-13954480	0.664712	0	-Inf	0.186511	0	-Inf	AT1G80850 (E=8e-081) | methyladenine glycosylase family protein
Bra003610	A07:14048968-14051088	0.034137	0	-Inf	0.0219852	0	-Inf	AT1G79450 (E=1e-175) ALIS5 | ALIS5 (ALA-Interacting Subunit 5)
Bra003635	A07:14173751-14175071	1.34009	0	-Inf	0.521245	0	-Inf	AT1G78850 (E=1e-242) | curculin-like (mannose-binding) lectin family protein
Bra003642	A07:14202251-14202569	1.88199	0	-Inf	4.15736	0	-Inf	AT1G78410 (E=9e-036) | VQ motif-containing protein
Bra003646	A07:14221760-14222695	0.474507	0	-Inf	3.21601	0	-Inf	AT1G78340 (E=1e-115) ATGSTU22 | ATGSTU22 (GLUTATHIONE S-TRANSFERASE TAU 22); glutathione transferase
Bra003647	A07:14223558-14224900	1.36788	0	-Inf	0.346824	0	-Inf	AT1G78320 (E=2e-109) ATGSTU23 | ATGSTU23 (GLUTATHIONE S-TRANSFERASE TAU 23); glutathione transferase
Bra003654	A07:14264683-14269669	0.0152491	0	-Inf	0.0130107	0	-Inf	AT1G22260 (E=1e-270) ZYP1a, ZYP1 | ZYP1a
Bra003655	A07:14270493-14271247	1.15584	0	-Inf	0.250154	0	-Inf	AT1G78170 (E=1e-092) | unknown protein
Bra003664	A07:14335288-14335534	7.75201	0	-Inf	9.29764	0	-Inf	AT1G77885 (E=7e-018) | unknown protein
Bra003673	A07:14385597-14386790	0.222301	0	-Inf	0.258419	0	-Inf	AT1G77700 (E=3e-111) | pathogenesis-related thaumatin family protein
Bra003680	A07:14433024-14434454	9.21962	0	-Inf	2.89824	0	-Inf	AT1G77520 (E=5e-139) | O-methyltransferase family 2 protein
Bra003682	A07:14441354-14442721	0.195434	0	-Inf	0.209686	0	-Inf	AT1G77520 (E=4e-167) | O-methyltransferase family 2 protein
Bra003696	A07:14539331-14540049	0.574218	0	-Inf	1.17992	0	-Inf	None
Bra003714	A07:14649222-14649855	3.51094	0	-Inf	1.97844	0	-Inf	AT1G76600 (E=3e-072) | unknown protein
Bra003720	A07:14697719-14698277	0.045945	0	-Inf	0.120222	0	-Inf	AT1G76410 (E=2e-061) ATL8 | ATL8; protein binding / zinc ion binding
Bra003726	A07:14723356-14724351	0.538894	0	-Inf	0.278322	0	-Inf	AT1G74090 (E=1e-115) SOT18, ATSOT18, ATST5B | SOT18 (DESULFO-GLUCOSINOLATE SULFOTRANSFERASE 18); 3-methylthiopropyl-desulfoglucosinolate sulfotransferase/ 4-methylthiobutyl-desulfoglucosinolate sulfotransferase/ 5-methylthiopentyl-desulfoglucosinolate sulfotransferase/ 7-methylthioheptyl-desulfogluco
Bra003732	A07:14743292-14744013	6.32447	0	-Inf	11.1542	0	-Inf	AT1G76180 (E=2e-017) ERD14 | ERD14 (EARLY RESPONSE TO DEHYDRATION 14); calcium ion binding
Bra003749	A07:14864466-14865817	0.37495	0	-Inf	0.161053	0	-Inf	AT1G75520 (E=1e-129) SRS5 | SRS5 (SHI-RELATED SEQUENCE 5)
Bra003755	A07:14902073-14902613	7.66266	0	-Inf	14.4201	0	-Inf	AT1G75390 (E=2e-060) AtbZIP44 | AtbZIP44 (Arabidopsis thaliana basic leucine-zipper 44); DNA binding / protein heterodimerization/ transcription factor
Bra003769	A07:14990911-14992744	0.741079	0	-Inf	0.952942	0	-Inf	AT1G75140 (E=7e-230) | unknown protein
Bra003772	A07:14997386-14998945	1.87475	0	-Inf	1.5185	0	-Inf	AT1G75080 (E=2e-143) BZR1 | BZR1 (BRASSINAZOLE-RESISTANT 1); DNA binding / transcription regulator/ transcription repressor
Bra003780	A07:15026894-15027479	0.837678	0	-Inf	0.382741	0	-Inf	AT1G74930 (E=3e-052) ORA47 | ORA47; DNA binding / transcription factor
Bra003782	A07:15037229-15038318	0.203425	0	-Inf	0.0530778	0	-Inf	AT1G74890 (E=8e-069) ARR15 | ARR15 (RESPONSE REGULATOR 15); transcription regulator/ two-component response regulator
Bra003793	A07:15090529-15091898	0.555081	0	-Inf	0.111731	0	-Inf	AT1G74650 (E=7e-124) ATY13, ATMYB31, MYB31 | MYB31 (MYB DOMAIN PROTEIN 31); DNA binding / transcription factor
Bra003802	A07:15150400-15152116	3.20627	0	-Inf	0.946361	0	-Inf	AT1G74420 (E=5e-107) FUT3, ATFUT3 | FUT3 (FUCOSYLTRANSFERASE 3); fucosyltransferase/ transferase, transferring glycosyl groups
Bra003803	A07:15152591-15155041	0.208359	0	-Inf	0.436448	0	-Inf	AT1G74400 (E=7e-192) | pentatricopeptide (PPR) repeat-containing protein
Bra003806	A07:15161364-15162528	0.103489	0	-Inf	0.2009	0	-Inf	AT1G74370 (E=2e-099) | zinc finger (C3HC4-type RING finger) family protein
Bra003813	A07:15182440-15184784	0.0666619	0	-Inf	0.2228	0	-Inf	AT1G74210 (E=4e-199) | glycerophosphoryl diester phosphodiesterase family protein
Bra003816	A07:15195701-15198790	0.0621827	0	-Inf	0.0265288	0	-Inf	AT1G74190 (E=0.0) AtRLP15 | AtRLP15 (Receptor Like Protein 15); protein binding
Bra003823	A07:15221909-15222620	10.2794	0	-Inf	9.89218	0	-Inf	AT1G73885 (E=1e-059) | unknown protein
Bra003824	A07:15224405-15225818	0.0225711	0	-Inf	0.0724569	0	-Inf	AT1G73880 (E=4e-237) UGT89B1 | UGT89B1 (UDP-GLUCOSYL TRANSFERASE 89B1); UDP-glycosyltransferase/ quercetin 3-O-glucosyltransferase/ quercetin 4'-O-glucosyltransferase/ quercetin 7-O-glucosyltransferase/ transferase, transferring glycosyl groups / transferase, transferring hexosyl group
Bra003842	A07:15316732-15317659	26.1593	0	-Inf	41.1088	0	-Inf	AT1G73500 (E=2e-148) ATMKK9, MKK9 | MKK9 (MAP KINASE KINASE 9); MAP kinase kinase/ kinase/ protein kinase activator
Bra003845	A07:15333732-15337386	0.0704072	0	-Inf	0.0257444	0	-Inf	AT1G73370 (E=0.0) SUS6, ATSUS6 | SUS6 (SUCROSE SYNTHASE 6); UDP-glycosyltransferase/ sucrose synthase
Bra003846	A07:15340373-15343160	0.229603	0	-Inf	0.0891344	0	-Inf	AT1G73360 (E=1e-243) HDG11, EDT1, ATHDG11 | HDG11 (HOMEODOMAIN GLABROUS 11); DNA binding / transcription factor
Bra003850	A07:15360057-15360666	4.15507	0	-Inf	2.93538	0	-Inf	AT1G73260 (E=5e-079) | trypsin and protease inhibitor family protein / Kunitz family protein
Bra003858	A07:15401638-15404813	0.291514	0	-Inf	0.552808	0	-Inf	AT1G73080 (E=0.0) PEPR1 | PEPR1 (PEP1 receptor 1); ATP binding / kinase/ protein binding / protein serine/threonine kinase
Bra003863	A07:15427500-15434332	0.015395	0	-Inf	0.00492244	0	-Inf	AT1G72960 (E=0.0) | root hair defective 3 GTP-binding (RHD3) family protein
Bra003869	A07:15464413-15466030	0.334744	0	-Inf	0.478515	0	-Inf	AT1G72790 (E=2e-154) | hydroxyproline-rich glycoprotein family protein
Bra003874	A07:15492890-15493514	28.5987	0	-Inf	2.1279	0	-Inf	AT1G72610 (E=6e-094) GLP1, ATGER1, GER1 | GER1 (GERMIN-LIKE PROTEIN 1); oxalate oxidase
Bra003875	A07:15500110-15501545	0.0421037	0	-Inf	0.0180479	0	-Inf	AT1G72540 (E=3e-192) | protein kinase, putative
Bra003883	A07:15541575-15542307	1.72473	0	-Inf	8.02406	0	-Inf	AT1G72360 (E=6e-051) | ethylene-responsive element-binding protein, putative
Bra003895	A07:15608387-15609358	0.14552	0	-Inf	0.0940824	0	-Inf	AT1G72130 (E=4e-106) | proton-dependent oligopeptide transport (POT) family protein
Bra003902	A07:15638830-15639436	0.58784	0	-Inf	3.37161	0	-Inf	AT1G71970 (E=6e-044) | unknown protein
Bra003903	A07:15647128-15653779	0.0305749	0	-Inf	0.0685714	0	-Inf	AT1G71960 (E=8e-301) | ABC transporter family protein
Bra003914	A07:15721943-15722999	5.57385	0	-Inf	6.26318	0	-Inf	AT1G71780 (E=3e-091) | unknown protein
Bra003922	A07:15772360-15774397	0.145567	0	-Inf	0.0466293	0	-Inf	AT1G71490 (E=0.0) | pentatricopeptide (PPR) repeat-containing protein
Bra003923	A07:15776004-15776557	0.734711	0	-Inf	0.0883694	0	-Inf	AT1G71480 (E=7e-037) | nuclear transport factor 2 (NTF2) family protein
Bra003924	A07:15781189-15781744	0.139336	0	-Inf	0.121565	0	-Inf	AT1G71450 (E=2e-077) | AP2 domain-containing transcription factor, putative
Bra003925	A07:15789281-15791699	0.239263	0	-Inf	0.14552	0	-Inf	AT1G71400 (E=9e-238) AtRLP12 | AtRLP12 (Receptor Like Protein 12); protein binding
Bra003926	A07:15798257-15799568	7.72624	0	-Inf	8.55659	0	-Inf	AT5G42090 (E=1e-215) | LOCATED IN: endomembrane system, integral to membrane; EXPRESSED IN: 24 plant structures; EXPRESSED DURING: 14 growth stages; CONTAINS InterPro DOMAIN/s: Transmembrane receptor, eukaryota (InterPro:IPR009637); BEST Arabidopsis thaliana protein match is: unknown protein (TAIR:AT3G09570.1); Has 303 Blast hits to 300 proteins in 77 species: Archae - 0; Bacteria - 0; Metazoa - …
Bra003936	A07:15835612-15836110	2.8692	0	-Inf	2.08259	0	-Inf	AT1G71130 (E=4e-046) | AP2 domain-containing transcription factor, putative
Bra003941	A07:15874638-15876472	0.0265159	0	-Inf	0.0343282	0	-Inf	AT1G70790 (E=1e-092) | C2 domain-containing protein
Bra003942	A07:15882914-15883416	5.38038	0	-Inf	7.41476	0	-Inf	AT1G70780 (E=3e-053) | unknown protein
Bra003956	A07:15951436-15952007	3.38688	0	-Inf	21.8601	0	-Inf	AT1G70350 (E=1e-021) | unknown protein
Bra003957	A07:15955228-15957464	0.28008	0	-Inf	0.0691427	0	-Inf	AT1G70280 (E=6e-205) | NHL repeat-containing protein
Bra003963	A07:15993506-15994139	4.92255	0	-Inf	14.6027	0	-Inf	AT1G70190 (E=4e-065) | ribosomal protein L12 family protein
Bra003979	A07:16078927-16087231	0.0846647	0	-Inf	0.109047	0	-Inf	AT1G69870 (E=1e-132) | proton-dependent oligopeptide transport (POT) family protein
Bra003981	A07:16116631-16117177	2.20864	0	-Inf	5.72285	0	-Inf	AT1G69760 (E=1e-058) | unknown protein
Bra004004	A07:16245644-16246916	0.352789	0	-Inf	0.129813	0	-Inf	AT1G69260 (E=3e-084) AFP1 | AFP1 (ABI FIVE BINDING PROTEIN)
Bra004009	A07:16277330-16277603	1.29309	0	-Inf	0.928713	0	-Inf	AT1G69050 (E=2e-012) | unknown protein
Bra004040	A07:16472179-16472980	0.343455	0	-Inf	0.253812	0	-Inf	AT1G68330 (E=1e-082) | unknown protein
Bra004046	A07:16516788-16517769	0.0729464	0	-Inf	0.0235045	0	-Inf	AT5G43690 (E=3e-128) | sulfotransferase family protein
Bra004069	A07:16659030-16661160	0.642868	0	-Inf	0.301084	0	-Inf	AT1G71400 (E=9e-197) AtRLP12 | AtRLP12 (Receptor Like Protein 12); protein binding
Bra004076	A07:16699273-16701130	0.276198	0	-Inf	0.275688	0	-Inf	AT1G67710 (E=7e-212) ARR11 | ARR11 (RESPONSE REGULATOR 11); transcription factor/ two-component response regulator
Bra004100	A07:16847819-16851848	0.0945126	0	-Inf	0.116039	0	-Inf	AT1G64960 (E=5e-308) | binding
Bra004108	A07:16882011-16883878	10.1893	0	-Inf	8.72543	0	-Inf	AT1G65020 (E=7e-131) | FUNCTIONS IN: molecular_function unknown; INVOLVED IN: biological_process unknown; LOCATED IN: endoplasmic reticulum, plasma membrane; EXPRESSED IN: 23 plant structures; EXPRESSED DURING: 13 growth stages; CONTAINS InterPro DOMAIN/s: NERD (InterPro:IPR011528); Has 53 Blast hits to 53 proteins in 19 species: Archae - 0; Bacteria - 18; Metazoa - 9; Fungi - 0; Plants - 19; Vir…
Bra004110	A07:16898397-16899716	1.08	0	-Inf	1.78259	0	-Inf	AT1G65290 (E=7e-050) mtACP2 | mtACP2 (mitochondrial acyl carrier protein 2); acyl carrier/ metal ion binding
Bra004116	A07:16923424-16927071	0.0842146	0	-Inf	0.154046	0	-Inf	AT1G65470 (E=1e-257) FAS1, NFB2 | FAS1 (FASCIATA 1); histone binding
Bra004121	A07:16956828-16962968	4.06294	0	-Inf	0.123813	0	-Inf	AT1G65590 (E=6e-265) HEXO3, ATHEX1 | HEXO3 (BETA-HEXOSAMINIDASE 3); beta-N-acetylhexosaminidase/ hexosaminidase
Bra004144	A07:17064546-17065203	3.44414	0	-Inf	4.72819	0	-Inf	AT1G66080 (E=2e-097) | unknown protein
Bra004145	A07:17066264-17067035	0.129537	0	-Inf	0.256803	0	-Inf	None
Bra004161	A07:17143687-17144769	0.411928	0	-Inf	0.337849	0	-Inf	AT1G66360 (E=3e-083) | C2 domain-containing protein
Bra004162	A07:17147043-17152299	0.082631	0	-Inf	0.142715	0	-Inf	AT1G66390 (E=5e-110) ATMYB90, PAP2, MYB90 | MYB90 (MYB DOMAIN PROTEIN 90); DNA binding / transcription factor
Bra004167	A07:17175797-17177978	0.0739123	0	-Inf	0.207871	0	-Inf	AT1G66460 (E=1e-113) | protein kinase family protein
Bra004196	A07:17368719-17369202	1.88591	0	-Inf	4.81396	0	-Inf	AT1G66890 (E=5e-048) | FUNCTIONS IN: molecular_function unknown; INVOLVED IN: biological_process unknown; LOCATED IN: chloroplast; EXPRESSED IN: 22 plant structures; EXPRESSED DURING: 13 growth stages; BEST Arabidopsis thaliana protein match is: 50S ribosomal protein-related (TAIR:AT5G16200.1); Has 14 Blast hits to 14 proteins in 3 species: Archae - 0; Bacteria - 0; Metazoa - 0; Fungi - 0; Plants…
Bra004199	A07:17375843-17378168	0.175394	0	-Inf	0.040876	0	-Inf	AT1G67000 (E=4e-204) | ATP binding / kinase/ protein kinase/ protein serine/threonine kinase
Bra004200	A07:17383776-17384352	0.0431555	0	-Inf	0.112752	0	-Inf	AT1G67030 (E=3e-059) ZFP6 | ZFP6 (ZINC FINGER PROTEIN 6); nucleic acid binding / transcription factor/ zinc ion binding
Bra004245	A07:17613249-17615124	0.264068	0	-Inf	0.130337	0	-Inf	AT1G67710 (E=6e-210) ARR11 | ARR11 (RESPONSE REGULATOR 11); transcription factor/ two-component response regulator
Bra004254	A07:17665172-17666663	0.0135873	0	-Inf	0.034937	0	-Inf	AT1G67750 (E=6e-211) | pectate lyase family protein
Bra004276	A07:17744415-17745789	1.72903	0	-Inf	1.39885	0	-Inf	AT1G68030 (E=9e-094) | PHD finger protein-related
Bra004282	A07:17766287-17767373	0.459998	0	-Inf	0.265433	0	-Inf	AT1G68110 (E=5e-141) | epsin N-terminal homology (ENTH) domain-containing protein / clathrin assembly protein-related
Bra004291	A07:17812857-17813823	0.143562	0	-Inf	0.0934028	0	-Inf	AT1G68230 (E=1e-057) | reticulon family protein (RTNLB14)
Bra004292	A07:17814733-17816044	6.89532	0	-Inf	6.80384	0	-Inf	AT5G42090 (E=2e-212) | LOCATED IN: endomembrane system, integral to membrane; EXPRESSED IN: 24 plant structures; EXPRESSED DURING: 14 growth stages; CONTAINS InterPro DOMAIN/s: Transmembrane receptor, eukaryota (InterPro:IPR009637); BEST Arabidopsis thaliana protein match is: unknown protein (TAIR:AT3G09570.1); Has 303 Blast hits to 300 proteins in 77 species: Archae - 0; Bacteria - 0; Metazoa - …
Bra004298	A07:17831956-17832739	0.101639	0	-Inf	0.164383	0	-Inf	AT1G68330 (E=5e-094) | unknown protein
Bra004308	A07:17881935-17882364	0.256209	0	-Inf	0.114073	0	-Inf	AT1G68430 (E=1e-034) | unknown protein
Bra004312	A07:17903161-17904710	0.187949	0	-Inf	0.173834	0	-Inf	AT1G68480 (E=1e-073) JAG | JAG (JAGGED); nucleic acid binding / transcription factor/ zinc ion binding
Bra004314	A07:17930217-17930460	12.6621	0	-Inf	20.2443	0	-Inf	AT1G68500 (E=1e-024) | unknown protein
Bra004325	A07:17995831-17996323	0.541854	0	-Inf	0.396889	0	-Inf	AT1G68610 (E=1e-072) | unknown protein
Bra004330	A07:18024576-18025960	1.7579	0	-Inf	0.26744	0	-Inf	AT1G68670 (E=1e-087) | myb family transcription factor
Bra004333	A07:18048833-18050623	2.96349	0	-Inf	2.41617	0	-Inf	AT1G68730 (E=6e-053) | zinc finger (DNL type) family protein
Bra004344	A07:18127132-18128232	1.9261	0	-Inf	1.599	0	-Inf	None
Bra004350	A07:18160894-18163132	0.0522508	0	-Inf	0.00836536	0	-Inf	AT1G68930 (E=0.0) | pentatricopeptide (PPR) repeat-containing protein
Bra004362	A07:18234875-18235856	2.55312	0	-Inf	0.399577	0	-Inf	AT1G69160 (E=2e-098) | unknown protein
Bra004370	A07:18298719-18300669	0.147899	0	-Inf	0.0545484	0	-Inf	AT1G69310 (E=6e-091) WRKY57, ATWRKY57 | WRKY57; transcription factor
Bra004376	A07:18326506-18328087	0.191588	0	-Inf	0.0448769	0	-Inf	AT1G69370 (E=5e-106) CM3, cm-3 | CM3 (chorismate mutase 3); chorismate mutase
Bra004378	A07:18330550-18331720	22.0472	0	-Inf	25.5051	0	-Inf	AT1G69390 (E=5e-098) ATMINE1 | ATMINE1 (Arabidopsis homologue of bacterial MinE 1); protein binding
Bra004384	A07:18355752-18356706	0.0948337	0	-Inf	0.122276	0	-Inf	AT1G69430 (E=1e-136) | unknown protein
Bra004411	A05:6883-11603	0.15884	0	-Inf	0.451642	0	-Inf	AT3G62850 (E=9e-075) | zinc finger protein-related
Bra004416	A05:26819-29238	0.0114986	0	-Inf	0.0147666	0	-Inf	AT2G48080 (E=2e-175) | oxidoreductase, 2OG-Fe(II) oxygenase family protein
Bra004424	A05:71391-71700	2.18593	0	-Inf	0.882569	0	-Inf	AT2G47880 (E=4e-052) | glutaredoxin family protein
Bra004430	A05:89261-89798	1.68952	0	-Inf	1.04233	0	-Inf	AT2G47770 (E=7e-058) | benzodiazepine receptor-related
Bra004437	A05:109662-110473	12.2462	0	-Inf	29.3328	0	-Inf	AT3G62790 (E=3e-045) | NADH-ubiquinone oxidoreductase-related
Bra004438	A05:110826-116185	0.83802	0	-Inf	0.0833981	0	-Inf	AT2G47680 (E=0.0) | zinc finger (CCCH type) helicase family protein
Bra004439	A05:118021-118642	11.3901	0	-Inf	10.8813	0	-Inf	AT2G47670 (E=3e-063) | invertase/pectin methylesterase inhibitor family protein
Bra004446	A05:157557-158247	0.436351	0	-Inf	0.444979	0	-Inf	AT3G62690 (E=9e-039) ATL5 | ATL5 (ATL5); protein binding / zinc ion binding
Bra004447	A05:158704-161209	0.0272265	0	-Inf	0.0116398	0	-Inf	AT2G47550 (E=5e-281) | pectinesterase family protein
Bra004453	A05:198982-199408	9.40982	0	-Inf	11.4146	0	-Inf	AT2G47485 (E=2e-056) | unknown protein
Bra004459	A05:250759-251143	989.766	0	-Inf	564.42	0	-Inf	AT2G47400 (E=4e-057) CP12-1, CP12 | CP12-1
Bra004465	A05:268734-269043	0.312275	0	-Inf	0.882569	0	-Inf	AT2G47270 (E=1e-048) | transcription factor/ transcription regulator
Bra004466	A05:274574-276116	0.112797	0	-Inf	0.218136	0	-Inf	AT2G47260 (E=8e-101) WRKY23, ATWRKY23 | WRKY23; transcription factor
Bra004474	A05:319334-322728	4.94895	0	-Inf	9.26001	0	-Inf	AT2G47180 (E=2e-180) AtGolS1 | AtGolS1 (Arabidopsis thaliana galactinol synthase 1); transferase, transferring glycosyl groups / transferase, transferring hexosyl groups
Bra004477	A05:340786-341770	109.155	0	-Inf	153.714	0	-Inf	AT2G47140 (E=2e-123) | short-chain dehydrogenase/reductase (SDR) family protein
Bra004483	A05:365535-367548	0.0222763	0	-Inf	0.014301	0	-Inf	AT2G47010 (E=8e-228) | unknown protein
Bra004488	A05:392772-394008	0.361103	0	-Inf	0.0859629	0	-Inf	AT3G60960 (E=1e-065) | pentatricopeptide (PPR) repeat-containing protein
Bra004499	A05:456750-457909	1.06685	0	-Inf	2.039	0	-Inf	AT2G46890 (E=2e-170) | oxidoreductase, acting on the CH-CH group of donors
Bra004515	A05:560572-560941	7.26111	0	-Inf	2.28943	0	-Inf	AT2G46690 (E=3e-059) | auxin-responsive family protein
Bra004517	A05:592778-594552	0.0293507	0	-Inf	0.100421	0	-Inf	AT2G46660 (E=1e-273) CYP78A6 | CYP78A6; electron carrier/ heme binding / iron ion binding / monooxygenase/ oxygen binding
Bra004520	A05:603048-604560	0.00320831	0	-Inf	0.0613084	0	-Inf	AT2G46630 (E=6e-054) | unknown protein
Bra004522	A05:611146-612553	4.39076	0	-Inf	11.5241	0	-Inf	AT2G46620 (E=3e-219) | AAA-type ATPase family protein
Bra004532	A05:676970-678431	3.00991	0	-Inf	0.736657	0	-Inf	AT2G46510 (E=3e-110) ATAIB | ATAIB (ABA-INDUCIBLE BHLH-TYPE TRANSCRIPTION FACTOR); DNA binding / transcription factor
Bra004533	A05:679172-679586	0.568569	0	-Inf	4.57721	0	-Inf	AT2G46505 (E=8e-043) SDH4 | SDH4; succinate dehydrogenase (ubiquinone)
Bra004541	A05:717753-720067	0.206259	0	-Inf	0.575785	0	-Inf	AT3G61670 (E=2e-129) | unknown protein
Bra004548	A05:758916-759726	0.0241162	0	-Inf	0.374173	0	-Inf	AT2G46310 (E=5e-073) CRF5 | CRF5 (CYTOKININ RESPONSE FACTOR 5); DNA binding / transcription factor
Bra004556	A05:792893-793726	31.9783	0	-Inf	6.64366	0	-Inf	AT2G46220 (E=4e-107) | unknown protein
Bra004563	A05:812746-813373	1.54646	0	-Inf	2.25297	0	-Inf	AT2G46160 (E=7e-072) | zinc finger (C3HC4-type RING finger) family protein
Bra004573	A05:852260-852845	3.18317	0	-Inf	1.31226	0	-Inf	AT2G40475 (E=7e-041) | unknown protein
Bra004574	A05:854614-855640	0.973572	0	-Inf	0.936446	0	-Inf	AT2G40490 (E=5e-132) HEME2 | HEME2; uroporphyrinogen decarboxylase
Bra004582	A05:885978-888000	2.65068	0	-Inf	0.520206	0	-Inf	AT2G40620 (E=2e-139) | bZIP transcription factor family protein
Bra004598	A05:974522-976478	0.144971	0	-Inf	0.283571	0	-Inf	AT2G41080 (E=3e-280) | pentatricopeptide (PPR) repeat-containing protein
Bra004599	A05:977561-978891	0.45934	0	-Inf	0.209942	0	-Inf	AT2G41130 (E=2e-103) | basic helix-loop-helix (bHLH) family protein
Bra004601	A05:989652-991270	1.1828	0	-Inf	0.0362158	0	-Inf	AT2G41150 (E=2e-177) | unknown protein
Bra004617	A05:1075962-1076916	0.208634	0	-Inf	0.0244551	0	-Inf	AT2G41370 (E=2e-158) BOP2 | BOP2 (BLADE ON PETIOLE2); protein binding
Bra004623	A05:1110297-1111312	5.27913	0	-Inf	3.23077	0	-Inf	AT2G41475 (E=7e-082) | FUNCTIONS IN: molecular_function unknown; INVOLVED IN: biological_process unknown; LOCATED IN: endomembrane system; CONTAINS InterPro DOMAIN/s: Lipase/lipooxygenase, PLAT/LH2 (InterPro:IPR008976), Embryo-specific 3 (InterPro:IPR010417); BEST Arabidopsis thaliana protein match is: embryo-specific protein-related (TAIR:AT5G62200.1); Has 60 Blast hits to 60 proteins in 11 spec…
Bra004628	A05:1129416-1131497	0.252289	0	-Inf	0.0883601	0	-Inf	AT2G41540 (E=3e-255) GPDHC1 | GPDHC1; NAD or NADH binding / glycerol-3-phosphate dehydrogenase (NAD+)
Bra004631	A05:1138739-1140067	0.415884	0	-Inf	0.466064	0	-Inf	AT2G04360 (E=2e-139) | unknown protein
Bra004640	A05:1183362-1185071	0.0123657	0	-Inf	0.0476626	0	-Inf	AT2G41705 (E=6e-163) | camphor resistance CrcB family protein
Bra004644	A05:1198584-1198971	1.29446	0	-Inf	1.91375	0	-Inf	AT2G41730 (E=8e-034) | unknown protein
Bra004647	A05:1214149-1214869	3.34014	0	-Inf	5.64804	0	-Inf	AT2G41750 (E=9e-087) | DTW domain-containing protein
Bra004648	A05:1215318-1218169	0.734448	0	-Inf	0.321797	0	-Inf	AT2G41770 (E=0.0) | unknown protein
Bra004651	A05:1235375-1237660	0.0306962	0	-Inf	0.0197509	0	-Inf	AT2G41810 (E=8e-198) | FUNCTIONS IN: molecular_function unknown; INVOLVED IN: biological_process unknown; LOCATED IN: endomembrane system; EXPRESSED IN: root; CONTAINS InterPro DOMAIN/s: Protein of unknown function DUF642 (InterPro:IPR006946), Galactose-binding like (InterPro:IPR008979); BEST Arabidopsis thaliana protein match is: unknown protein (TAIR:AT2G41800.1); Has 161 Blast hits to 157 prot…
Bra004658	A05:1268779-1270895	0.287164	0	-Inf	0.316465	0	-Inf	AT3G57700 (E=7e-073) | protein kinase, putative
Bra004660	A05:1278037-1278790	8.70044	0	-Inf	0.664818	0	-Inf	AT2G41940 (E=4e-093) ZFP8 | ZFP8 (ZINC FINGER PROTEIN 8); nucleic acid binding / transcription factor/ zinc ion binding
Bra004669	A05:1307860-1309507	0.326435	0	-Inf	0.32484	0	-Inf	AT2G42080 (E=8e-077) | DNAJ heat shock N-terminal domain-containing protein
Bra004671	A05:1312591-1314183	3.25645	0	-Inf	1.82679	0	-Inf	AT2G42130 (E=2e-117) | unknown protein
Bra004677	A05:1335647-1336385	0.0977932	0	-Inf	0.0423411	0	-Inf	AT2G42260 (E=8e-055) UVI4, PYM | UVI4 (UV-B-INSENSITIVE 4)
Bra004680	A05:1347303-1347645	35.7947	0	-Inf	63.3319	0	-Inf	AT2G42310 (E=1e-056) | unknown protein
Bra004682	A05:1352792-1353785	0.394457	0	-Inf	0.439001	0	-Inf	AT1G67470 (E=2e-067) | protein kinase family protein
Bra004713	A05:1482780-1483704	2.91791	0	-Inf	3.74415	0	-Inf	AT3G58840 (E=8e-039) | LOCATED IN: mitochondrion, plastid; EXPRESSED IN: 21 plant structures; EXPRESSED DURING: 9 growth stages; BEST Arabidopsis thaliana protein match is: myosin heavy chain-related (TAIR:AT1G06530.1); Has 122842 Blast hits to 54311 proteins in 2061 species: Archae - 1832; Bacteria - 13809; Metazoa - 62057; Fungi - 8845; Plants - 4054; Viruses - 676; Other Eukaryotes - 31569 (so…
Bra004715	A05:1491902-1493325	0.0402489	0	-Inf	0.0172471	0	-Inf	AT2G42840 (E=4e-047) PDF1 | PDF1 (PROTODERMAL FACTOR 1)
Bra004717	A05:1501742-1502587	0.518149	0	-Inf	0.941612	0	-Inf	AT2G42820 (E=2e-083) HVA22F | HVA22F (HVA22-LIKE PROTEIN F)
Bra004729	A05:1551663-1552425	1.53792	0	-Inf	0.446267	0	-Inf	AT2G42900 (E=2e-100) | FUNCTIONS IN: molecular_function unknown; INVOLVED IN: biological_process unknown; LOCATED IN: cellular_component unknown; EXPRESSED IN: 22 plant structures; EXPRESSED DURING: 13 growth stages; CONTAINS InterPro DOMAIN/s: Plant Basic Secretory Protein (InterPro:IPR007541); Has 25 Blast hits to 25 proteins in 11 species: Archae - 0; Bacteria - 0; Metazoa - 1; Fungi - 0; Plan…
Bra004731	A05:1556013-1557663	0.140007	0	-Inf	0.17959	0	-Inf	AT2G42920 (E=4e-236) | pentatricopeptide (PPR) repeat-containing protein
Bra004734	A05:1563916-1565485	0.0793612	0	-Inf	0.0254576	0	-Inf	AT2G42980 (E=2e-227) | aspartyl protease family protein
Bra004744	A05:1608380-1609157	4.98895	0	-Inf	0.532458	0	-Inf	AT2G43100 (E=1e-096) | aconitase C-terminal domain-containing protein
Bra004753	A05:1667243-1668842	0.00969459	0	-Inf	0.0248757	0	-Inf	AT2G43250 (E=4e-046) | unknown protein
Bra004755	A05:1672274-1673630	0.435594	0	-Inf	0.592717	0	-Inf	AT2G43260 (E=5e-162) | F-box family protein / S locus-related
Bra004756	A05:1677417-1679353	0.0934108	0	-Inf	0.146529	0	-Inf	AT2G43330 (E=7e-217) ATINT1, INT1 | INT1 (INOSITOL TRANSPORTER 1); carbohydrate transmembrane transporter/ myo-inositol:hydrogen symporter/ sugar:hydrogen symporter
Bra004757	A05:1684277-1684908	0.192055	0	-Inf	0.125777	0	-Inf	AT2G43340 (E=5e-052) | unknown protein
Bra004768	A05:1740241-1740588	33.556	0	-Inf	32.1709	0	-Inf	AT2G43510 (E=2e-034) ATTI1 | ATTI1; serine-type endopeptidase inhibitor
Bra004772	A05:1764573-1765786	0.335199	0	-Inf	0.202059	0	-Inf	AT2G43620 (E=8e-120) | chitinase, putative
Bra004778	A05:1802119-1804421	12.2333	0	-Inf	7.81152	0	-Inf	AT2G43710 (E=9e-214) SSI2, FAB2 | SSI2; acyl-[acyl-carrier-protein] desaturase/ stearoyl-CoA 9-desaturase
Bra004784	A05:1814777-1818718	0.796422	0	-Inf	1.11572	0	-Inf	AT2G43790 (E=1e-220) ATMPK6, MPK6, MAPK6 | ATMPK6 (ARABIDOPSIS THALIANA MAP KINASE 6); MAP kinase/ kinase
Bra004786	A05:1822214-1825011	0.178396	0	-Inf	0.363969	0	-Inf	AT2G43800 (E=5e-200) | formin homology 2 domain-containing protein / FH2 domain-containing protein
Bra004795	A05:1863095-1865725	12.4269	0	-Inf	11.1956	0	-Inf	AT2G43970 (E=7e-137) | La domain-containing protein
Bra004797	A05:1868985-1870488	0.334571	0	-Inf	0.254967	0	-Inf	AT2G43990 (E=8e-067) | unknown protein
Bra004799	A05:1873481-1873766	0.495214	0	-Inf	0.708463	0	-Inf	AT2G44010 (E=2e-028) | unknown protein
Bra004800	A05:1874740-1876084	2.17511	0	-Inf	2.77863	0	-Inf	AT2G44020 (E=8e-227) | mitochondrial transcription termination factor-related / mTERF-related
Bra004803	A05:1892846-1893176	2.46586	0	-Inf	11.5757	0	-Inf	AT2G44080 (E=5e-017) ARL | ARL (ARGOS-LIKE)
Bra004812	A05:1921740-1923420	4.63892	0	-Inf	6.63875	0	-Inf	AT2G44200 (E=3e-061) | unknown protein
Bra004847	A05:2124204-2124642	2.98243	0	-Inf	7.089	0	-Inf	AT2G44578 (E=7e-041) | protein binding / zinc ion binding
Bra004849	A05:2129745-2130591	1.10658	0	-Inf	1.34205	0	-Inf	AT2G44600 (E=2e-083) | unknown protein
Bra004853	A05:2139866-2141063	56.1079	0	-Inf	92.0407	0	-Inf	AT2G44650 (E=6e-054) CHL-CPN10, CPN10 | CHL-CPN10 (CHLOROPLAST CHAPERONIN 10); chaperone binding
Bra004855	A05:2147595-2147974	13.2756	0	-Inf	30.3134	0	-Inf	AT2G44670 (E=3e-038) | senescence-associated protein-related
Bra004859	A05:2158461-2159370	9.18591	0	-Inf	15.5239	0	-Inf	AT2G44730 (E=1e-046) | transcription factor
Bra004862	A05:2162864-2164474	0.0466232	0	-Inf	0.0149698	0	-Inf	AT5G51160 (E=4e-064) | ankyrin repeat family protein
Bra004872	A05:2228411-2231516	0.301146	0	-Inf	0.0986944	0	-Inf	AT2G44830 (E=5e-262) | protein kinase, putative
Bra004874	A05:2237722-2239355	0.210243	0	-Inf	0.0814145	0	-Inf	AT2G44910 (E=2e-088) ATHB4, ATHB-4 | ATHB4 (ARABIDOPSIS THALIANA HOMEOBOX-LEUCINE ZIPPER PROTEIN 4); DNA binding / transcription factor
Bra004885	A05:2296231-2297251	0.51828	0	-Inf	0.979216	0	-Inf	AT2G45040 (E=2e-155) | matrix metalloproteinase
Bra004886	A05:2302496-2303350	0.439829	0	-Inf	0.0334834	0	-Inf	AT2G45050 (E=6e-105) | zinc finger (GATA type) family protein
Bra004921	A05:2502643-2505578	0.162891	0	-Inf	0.0261299	0	-Inf	AT2G45580 (E=1e-212) CYP76C3 | CYP76C3; electron carrier/ heme binding / iron ion binding / monooxygenase/ oxygen binding
Bra004922	A05:2508892-2509930	1.4412	0	-Inf	0.0965193	0	-Inf	None
Bra004924	A05:2518219-2519194	0.018394	0	-Inf	0.0474186	0	-Inf	AT2G45600 (E=1e-169) | hydrolase
Bra004931	A05:2547489-2549115	1.14002	0	-Inf	3.81459	0	-Inf	AT2G45720 (E=4e-233) | armadillo/beta-catenin repeat family protein
Bra004933	A05:2552614-2555333	0.584497	0	-Inf	1.84256	0	-Inf	AT2G45750 (E=0.0) | dehydration-responsive family protein
Bra004955	A05:2646278-2647164	0.610204	0	-Inf	0.298116	0	-Inf	AT2G46000 (E=1e-055) | unknown protein
Bra004956	A05:2647913-2649558	0.111191	0	-Inf	0.181601	0	-Inf	AT2G46040 (E=1e-122) | ARID/BRIGHT DNA-binding domain-containing protein / ELM2 domain-containing protein
Bra004957	A05:2651972-2653649	0.0732276	0	-Inf	0.0352206	0	-Inf	AT2G46050 (E=2e-238) | pentatricopeptide (PPR) repeat-containing protein
Bra004961	A05:2663968-2665958	0.952862	0	-Inf	0.987687	0	-Inf	AT2G46090 (E=6e-125) | diacylglycerol kinase family protein
Bra004962	A05:2666238-2667341	20.3883	0	-Inf	30.2711	0	-Inf	AT2G46100 (E=1e-106) | unknown protein
Bra004965	A05:2673815-2674457	4.02378	0	-Inf	7.98893	0	-Inf	AT2G40380 (E=3e-069) PRA1.B2 | PRA1.B2 (PRENYLATED RAB ACCEPTOR 1.B2)
Bra004967	A05:2688166-2688805	1.566	0	-Inf	2.50042	0	-Inf	AT2G40330 (E=7e-085) | Bet v I allergen family protein
Bra004977	A05:2755864-2757160	0.339787	0	-Inf	0.452782	0	-Inf	AT2G40230 (E=2e-222) | transferase family protein
Bra004980	A05:2787980-2789644	0.0400726	0	-Inf	0.0258491	0	-Inf	AT2G40180 (E=6e-103) ATHPP2C5 | ATHPP2C5; catalytic/ protein serine/threonine phosphatase
Bra004983	A05:2804145-2808768	0.332933	0	-Inf	0.196158	0	-Inf	AT2G40130 (E=0.0) | heat shock protein-related
Bra004994	A05:2866782-2868039	7.34172	0	-Inf	2.9818	0	-Inf	AT2G40000 (E=7e-177) HSPRO2, ATHSPRO2 | HSPRO2 (ARABIDOPSIS ORTHOLOG OF SUGAR BEET HS1 PRO-1 2)
Bra005006	A05:2932091-2934035	0.878394	0	-Inf	0.824731	0	-Inf	AT2G39880 (E=4e-104) MYB25, AtMYB25 | MYB25 (myb domain protein 25); DNA binding / transcription factor
Bra005007	A05:2937326-2938363	0.679778	0	-Inf	0.243457	0	-Inf	AT2G39870 (E=2e-065) | unknown protein
Bra005010	A05:2953277-2954567	0.0886159	0	-Inf	0.032535	0	-Inf	None
Bra005020	A05:3001697-3002723	4.26714	0	-Inf	11.3241	0	-Inf	AT2G39720 (E=7e-079) RHC2A | RHC2A; protein binding / zinc ion binding
Bra005022	A05:3016879-3017170	25.8078	0	-Inf	44.3099	0	-Inf	AT2G39705 (E=6e-026) RTFL8, DVL11 | RTFL8 (ROTUNDIFOLIA LIKE 8)
Bra005033	A05:3082878-3084652	0.0904605	0	-Inf	0.0193989	0	-Inf	AT2G39510 (E=2e-189) | nodulin MtN21 family protein
Bra005047	A05:3154388-3155324	0.116921	0	-Inf	0.125664	0	-Inf	AT2G39370 (E=3e-106) | unknown protein
Bra005051	A05:3177023-3178868	0.00817109	0	-Inf	0.0209494	0	-Inf	AT2G39350 (E=2e-306) | ABC transporter family protein
Bra005058	A05:3210933-3212610	0.55078	0	-Inf	0.388186	0	-Inf	AT2G39220 (E=3e-239) PLP6, PLA IIB | PLP6 (PATATIN-LIKE PROTEIN 6); nutrient reservoir
Bra005066	A05:3261533-3264356	2.19309	0	-Inf	0.949742	0	-Inf	AT2G38970 (E=2e-211) | zinc finger (C3HC4-type RING finger) family protein
Bra005072	A05:3301409-3303363	5.37114	0	-Inf	5.68697	0	-Inf	None
Bra005077	A05:3323136-3324714	5.02421	0	-Inf	5.57428	0	-Inf	AT2G38800 (E=3e-092) | calmodulin-binding protein-related
Bra005109	A05:3470107-3471472	0.318186	0	-Inf	0.332999	0	-Inf	AT2G38420 (E=5e-190) | pentatricopeptide (PPR) repeat-containing protein
Bra005111	A05:3478233-3480554	0.0223347	0	-Inf	0.0286773	0	-Inf	AT2G38400 (E=8e-236) AGT3 | AGT3 (ALANINE:GLYOXYLATE AMINOTRANSFERASE 3); alanine-glyoxylate transaminase/ catalytic/ pyridoxal phosphate binding / transaminase
Bra005113	A05:3486951-3487695	0.220349	0	-Inf	0.214072	0	-Inf	AT2G38340 (E=1e-067) | AP2 domain-containing transcription factor, putative (DRE2B)
Bra005118	A05:3516241-3516764	0.837821	0	-Inf	0.190786	0	-Inf	AT5G07090 (E=1e-012) | 40S ribosomal protein S4 (RPS4B)
Bra005123	A05:3546242-3549558	0.441534	0	-Inf	0.226045	0	-Inf	AT3G51770 (E=0.0) ETO1 | ETO1 (ETHYLENE OVERPRODUCER 1); protein binding, bridging
Bra005127	A05:3569692-3570783	0.40546	0	-Inf	0.358155	0	-Inf	AT2G38250 (E=3e-075) | DNA-binding protein-related
Bra005143	A05:3703740-3707083	0.0917199	0	-Inf	0.0335646	0	-Inf	AT2G38010 (E=0.0) | ceramidase family protein
Bra005147	A05:3721901-3722894	0.180976	0	-Inf	0.0942112	0	-Inf	AT2G37950 (E=3e-079) | zinc finger (C3HC4-type RING finger) family protein
Bra005150	A05:3731878-3732328	0.0749769	0	-Inf	0.0996222	0	-Inf	AT2G37925 (E=6e-051) COPT4 | COPT4; copper ion transmembrane transporter/ high affinity copper ion transmembrane transporter
Bra005155	A05:3747808-3748177	0.41891	0	-Inf	0.953931	0	-Inf	AT1G76430 (E=2e-026) | phosphate transporter family protein
Bra005164	A05:3775672-3775915	18.2897	0	-Inf	26.3176	0	-Inf	AT2G37750 (E=6e-017) | unknown protein
Bra005185	A05:3883955-3884267	105.914	0	-Inf	185.405	0	-Inf	AT5G59690 (E=3e-041) | histone H4
Bra005189	A05:3904383-3905226	8.95386	0	-Inf	11.7213	0	-Inf	AT2G37510 (E=5e-057) | RNA-binding protein, putative
Bra005197	A05:3959261-3959765	0.0569918	0	-Inf	0.300043	0	-Inf	AT2G37430 (E=8e-074) | zinc finger (C2H2 type) family protein (ZAT11)
Bra005204	A05:3992054-3993361	0.518818	0	-Inf	1.37171	0	-Inf	AT2G37330 (E=2e-128) ALS3 | ALS3 (ALUMINUM SENSITIVE 3)
Bra005210	A05:4035603-4037093	0.0269173	0	-Inf	0.27683	0	-Inf	AT2G37260 (E=8e-101) TTG2, ATWRKY44, WRKY44, DSL1 | TTG2 (TRANSPARENT TESTA GLABRA 2); transcription factor
Bra005217	A05:4074641-4075514	0.926898	0	-Inf	0.473147	0	-Inf	AT2G37100 (E=2e-069) | protamine P1 family protein
Bra005233	A05:4176307-4177239	10.8984	0	-Inf	12.6608	0	-Inf	AT2G36900 (E=2e-100) MEMB11, ATMEMB11 | MEMB11 (MEMBRIN 11); SNAP receptor
Bra005243	A05:4243033-4253567	0.508683	0	-Inf	1.26201	0	-Inf	AT2G36770 (E=4e-209) | UDP-glucoronosyl/UDP-glucosyl transferase family protein
Bra005246	A05:4255583-4257071	0.43399	0	-Inf	0.298911	0	-Inf	AT2G36750 (E=6e-239) UGT73C1 | UGT73C1 (UDP-GLUCOSYL TRANSFERASE 73C1); UDP-glucosyltransferase/ UDP-glycosyltransferase/ cis-zeatin O-beta-D-glucosyltransferase/ trans-zeatin O-beta-D-glucosyltransferase/ transferase, transferring glycosyl groups
Bra005247	A05:4269665-4271174	0.0800585	0	-Inf	0.0734347	0	-Inf	AT2G36730 (E=3e-133) | pentatricopeptide (PPR) repeat-containing protein
Bra005267	A05:4399071-4401644	0.121511	0	-Inf	0.104142	0	-Inf	AT2G36420 (E=1e-114) | unknown protein
Bra005271	A05:4461688-4469878	0.426446	0	-Inf	0.0205834	0	-Inf	AT5G48620 (E=3e-312) | disease resistance protein (CC-NBS-LRR class), putative
Bra005272	A05:4470464-4474615	0.0176258	0	-Inf	0.0113013	0	-Inf	AT2G36360 (E=5e-120) | kelch repeat-containing protein
Bra005285	A05:4548585-4549356	10.6464	0	-Inf	15.0597	0	-Inf	AT2G36300 (E=2e-089) | integral membrane Yip1 family protein
Bra005289	A05:4564687-4565521	0.969032	0	-Inf	0.954062	0	-Inf	AT2G36240 (E=3e-120) | FUNCTIONS IN: molecular_function unknown; INVOLVED IN: biological_process unknown; LOCATED IN: cellular_component unknown; EXPRESSED IN: 22 plant structures; EXPRESSED DURING: 13 growth stages; CONTAINS InterPro DOMAIN/s: Pentatricopeptide repeat (InterPro:IPR002885); BEST Arabidopsis thaliana protein match is: pentatricopeptide (PPR) repeat-containing protein (TAIR:AT1G099…
Bra005294	A05:4591984-4597210	0.0232529	0	-Inf	0.00595049	0	-Inf	AT2G36200 (E=0.0) | kinesin motor protein-related
Bra005300	A05:4625663-4626605	0.14226	0	-Inf	0.0262228	0	-Inf	AT2G36090 (E=1e-104) | F-box family protein
Bra005303	A05:4679132-4679693	0.772741	0	-Inf	0.951277	0	-Inf	AT2G36026 (E=3e-050) | FUNCTIONS IN: molecular_function unknown; INVOLVED IN: biological_process unknown; LOCATED IN: cellular_component unknown; CONTAINS InterPro DOMAIN/s: Protein of unknown function DUF623, plant (InterPro:IPR006458); BEST Arabidopsis thaliana protein match is: OFP6 (OVATE FAMILY PROTEIN 6) (TAIR:AT3G52525.1); Has 230 Blast hits to 230 proteins in 12 species: Archae - 0; Bacte…
Bra005309	A05:4719050-4720214	2.87814	0	-Inf	0.781331	0	-Inf	AT2G35930 (E=9e-184) PUB23 | PUB23 (PLANT U-BOX 23); ubiquitin-protein ligase
Bra005326	A05:4848844-4851286	0.087803	0	-Inf	0.113125	0	-Inf	AT2G35600 (E=4e-148) BRXL1, ATBRXL1 | BRXL1 (BREVIS RADIX LIKE 1)
Bra005338	A05:4919412-4920175	0.497718	0	-Inf	1.78641	0	-Inf	AT2G35480 (E=5e-079) | unknown protein
Bra005362	A05:5025634-5026864	0.107669	0	-Inf	0.0865095	0	-Inf	AT2G35160 (E=1e-166) SUVH5, SGD9 | SUVH5 (SU(VAR)3-9 HOMOLOG 5); histone methyltransferase
Bra005374	A05:5091971-5093078	2.08702	0	-Inf	2.62619	0	-Inf	AT2G35000 (E=5e-108) | zinc finger (C3HC4-type RING finger) family protein
Bra005375	A05:5096090-5097032	0.057931	0	-Inf	0.149417	0	-Inf	AT2G34990 (E=4e-071) | zinc finger (C3HC4-type RING finger) family protein
Bra005376	A05:5098003-5098948	0.542811	0	-Inf	0.800553	0	-Inf	AT2G34980 (E=4e-112) SETH1 | SETH1; phosphatidylinositol N-acetylglucosaminyltransferase/ transferase
Bra005377	A05:5099856-5102034	2.15609	0	-Inf	2.34755	0	-Inf	AT2G34970 (E=0.0) | eIF4-gamma/eIF5/eIF2-epsilon domain-containing protein
Bra005378	A05:5103296-5106011	0.488446	0	-Inf	0.194947	0	-Inf	AT2G34930 (E=0.0) | disease resistance family protein
Bra005381	A05:5123696-5126188	0.0383562	0	-Inf	0.0196626	0	-Inf	AT2G34920 (E=9e-191) EDA18 | EDA18 (embryo sac development arrest 18); protein binding / zinc ion binding
Bra005383	A05:5128621-5130666	2.44639	0	-Inf	3.87736	0	-Inf	AT2G34900 (E=2e-161) GTE01, IMB1, GTE1 | IMB1 (IMBIBITION-INDUCIBLE 1); DNA binding
Bra005390	A05:5168999-5170619	5.42025	0	-Inf	2.75445	0	-Inf	AT2G34810 (E=2e-279) | FAD-binding domain-containing protein
Bra005396	A05:5218787-5227039	0.0477455	0	-Inf	0.0611991	0	-Inf	AT2G34750 (E=9e-121) | RNA polymerase I specific transcription initiation factor RRN3 family protein
Bra005404	A05:5328263-5330428	7.27032	0	-Inf	12.5011	0	-Inf	AT2G34640 (E=1e-244) PTAC12 | PTAC12 (PLASTID TRANSCRIPTIONALLY ACTIVE12)
Bra005408	A05:5351758-5352706	1.97111	0	-Inf	3.10929	0	-Inf	AT1G36310 (E=6e-103) | methyltransferase
Bra005420	A05:5398972-5400466	0.126394	0	-Inf	0.365023	0	-Inf	AT2G34500 (E=2e-226) CYP710A1 | CYP710A1 (cytochrome P450, family 710, subfamily A, polypeptide 1); C-22 sterol desaturase/ oxygen binding
Bra005426	A05:5427912-5428643	0.370938	0	-Inf	0.124306	0	-Inf	AT2G34410 (E=1e-059) | O-acetyltransferase family protein
Bra005427	A05:5429730-5431649	0.105617	0	-Inf	0.0624875	0	-Inf	AT2G34400 (E=1e-287) | pentatricopeptide (PPR) repeat-containing protein
Bra005434	A05:5453799-5459586	1.25679	0	-Inf	1.06373	0	-Inf	AT2G34357 (E=0.0) | binding
Bra005436	A05:5479894-5480278	12.3298	0	-Inf	7.54528	0	-Inf	AT2G34340 (E=3e-035) | unknown protein
Bra005450	A05:5549215-5553044	0.267885	0	-Inf	0.048005	0	-Inf	AT2G34150 (E=8e-257) WAVE1 | WAVE1; actin monomer binding
Bra005461	A05:5602894-5605159	0.121937	0	-Inf	0.236005	0	-Inf	AT2G34000 (E=4e-068) | zinc finger protein-related
Bra005467	A05:5658446-5659197	0.971209	0	-Inf	10.3217	0	-Inf	AT2G33845 (E=2e-063) | DNA-binding protein-related
Bra005484	A05:5759412-5760648	0.806409	0	-Inf	0.132027	0	-Inf	AT2G33570 (E=7e-208) | unknown protein
Bra005502	A05:5832775-5834424	2.91289	0	-Inf	0.875611	0	-Inf	AT2G33360 (E=2e-125) | unknown protein
Bra005512	A05:5897003-5898578	0.225649	0	-Inf	0.358631	0	-Inf	AT2G33260 (E=7e-153) | tryptophan/tyrosine permease family protein
Bra005525	A05:6007418-6009785	0.0122554	0	-Inf	0.0470801	0	-Inf	AT2G33060 (E=6e-223) AtRLP27 | AtRLP27 (Receptor Like Protein 27); kinase/ protein binding
Bra005528	A05:6022216-6024421	0.690903	0	-Inf	0.391425	0	-Inf	AT2G33060 (E=9e-291) AtRLP27 | AtRLP27 (Receptor Like Protein 27); kinase/ protein binding
Bra005529	A05:6024938-6030809	0.115271	0	-Inf	0.156345	0	-Inf	AT2G33060 (E=2e-143) AtRLP27 | AtRLP27 (Receptor Like Protein 27); kinase/ protein binding
Bra005530	A05:6035170-6037576	3.25429	0	-Inf	2.665	0	-Inf	AT2G33050 (E=0.0) AtRLP26 | AtRLP26 (Receptor Like Protein 26); kinase/ protein binding
Bra005537	A05:6073101-6075104	1.0605	0	-Inf	0.417335	0	-Inf	AT2G32980 (E=3e-110) | unknown protein
Bra005544	A05:6138845-6140165	1.54909	0	-Inf	3.58554	0	-Inf	AT4G33260 (E=9e-181) CDC20.2 | CDC20.2; signal transducer
Bra005567	A05:6267537-6270507	0.047543	0	-Inf	0.0304177	0	-Inf	AT3G24900 (E=2e-277) AtRLP39 | AtRLP39 (Receptor Like Protein 39); protein binding
Bra005599	A05:6455913-6457017	0.0620627	0	-Inf	0.0798735	0	-Inf	AT2G32510 (E=1e-162) MAPKKK17 | MAPKKK17; ATP binding / kinase/ protein kinase/ protein serine/threonine kinase
Bra005607	A05:6504104-6504521	1.57648	0	-Inf	3.60487	0	-Inf	AT2G32650 (E=7e-072) | FUNCTIONS IN: molecular_function unknown; INVOLVED IN: biological_process unknown; CONTAINS InterPro DOMAIN/s: Cupin, RmlC-type (InterPro:IPR011051), Protein of unknown function DUF861, cupin-3 (InterPro:IPR008579), RmlC-like jelly roll fold (InterPro:IPR014710); BEST Arabidopsis thaliana protein match is: PTAC18 (PLASTID TRANSCRIPTIONALLY ACTIVE 18) (TAIR:AT2G32180.1); Has…
Bra005611	A05:6526916-6528167	5.93882	0	-Inf	2.10001	0	-Inf	AT2G32100 (E=1e-056) ATOFP16, OFP16 | OFP16 (ARABIDOPSIS THALIANA OVATE FAMILY PROTEIN 16)
Bra005622	A05:6578967-6580247	0.935242	0	-Inf	0.341038	0	-Inf	AT2G31960 (E=2e-048) ATGSL03, GSL03, ATGSL3 | ATGSL03 (GLUCAN SYNTHASE-LIKE 3); 1,3-beta-glucan synthase/ transferase, transferring glycosyl groups
Bra005632	A05:6642043-6642598	0.882462	0	-Inf	0.729388	0	-Inf	AT2G32020 (E=2e-089) | GCN5-related N-acetyltransferase (GNAT) family protein
Bra005647	A05:6741789-6743439	1.44494	0	-Inf	0.396889	0	-Inf	AT2G31710 (E=6e-036) | unknown protein
Bra005671	A03:72063-74908	0.0189552	0	-Inf	0.0404585	0	-Inf	AT5G01690 (E=1e-209) ATCHX27, CHX27 | ATCHX27; monovalent cation:proton antiporter/ sodium:hydrogen antiporter
Bra005672	A03:76122-77776	0.018554	0	-Inf	0.0478355	0	-Inf	AT5G01670 (E=1e-163) | aldose reductase, putative
Bra005680	A03:105681-107737	0.138331	0	-Inf	0.10834	0	-Inf	AT5G01560 (E=2e-143) LECRKA4.3 | LECRKA4.3 (LECTIN RECEPTOR KINASE A4.3); kinase
Bra005687	A03:127653-128583	270.986	0	-Inf	355.672	0	-Inf	AT5G01410 (E=4e-162) PDX1, ATPDX1.3, RSR4, PDX1.3, ATPDX1 | RSR4 (REDUCED SUGAR RESPONSE 4); protein heterodimerization/ protein homodimerization
Bra005688	A03:132014-133666	0.286009	0	-Inf	0.0568269	0	-Inf	AT5G01380 (E=3e-103) | transcription factor
Bra005701	A03:187282-188432	0.492873	0	-Inf	0.219089	0	-Inf	AT5G02020 (E=3e-049) | unknown protein
Bra005702	A03:193210-194184	0.620587	0	-Inf	0.285101	0	-Inf	AT5G08420 (E=3e-056) | RNA binding
Bra005703	A03:200311-203613	0.303401	0	-Inf	0.217435	0	-Inf	AT5G02030 (E=6e-206) LSN, PNY, HB-6, BLR, RPL, BLH9, VAN | RPL (REPLUMLESS); DNA binding / sequence-specific DNA binding / transcription factor
Bra005711	A03:228823-229641	0.192806	0	-Inf	0.0713573	0	-Inf	AT5G02140 (E=2e-128) | thaumatin-like protein, putative
Bra005713	A03:247178-249257	0.0505184	0	-Inf	0.0980372	0	-Inf	AT5G02260 (E=4e-140) ATEXPA9, EXP9, ATEXP9, ATHEXP ALPHA 1.10 | ATEXPA9 (ARABIDOPSIS THALIANA EXPANSIN A9)
Bra005720	A03:272233-275766	1379.59	0	-Inf	2129.7	0	-Inf	AT3G09390 (E=2e-024) MT2A, ATMT-K, ATMT-1 | MT2A (METALLOTHIONEIN 2A); copper ion binding
Bra005721	A03:282354-285159	0.0124341	0	-Inf	0.0477689	0	-Inf	AT5G02390 (E=7e-145) | unknown protein
Bra005740	A03:386138-386870	0.452389	0	-Inf	0.073279	0	-Inf	AT5G03170 (E=1e-092) FLA11 | FLA11
Bra005747	A03:415378-416688	0.600522	0	-Inf	0.122049	0	-Inf	AT5G02890 (E=7e-135) | transferase family protein
Bra005749	A03:425103-426523	7.52737	0	-Inf	13.2411	0	-Inf	AT3G09630 (E=2e-209) | 60S ribosomal protein L4/L1 (RPL4A)
Bra005750	A03:427235-428605	0.6588	0	-Inf	0.614035	0	-Inf	AT5G02850 (E=2e-041) | hydroxyproline-rich glycoprotein family protein
Bra005755	A03:445172-446494	1.91609	0	-Inf	0.373122	0	-Inf	AT5G02760 (E=2e-166) | protein phosphatase 2C family protein / PP2C family protein
Bra005757	A03:459035-459497	0.0700728	0	-Inf	0.0928699	0	-Inf	AT5G02640 (E=2e-050) | unknown protein
Bra005758	A03:459979-461221	0.518342	0	-Inf	2.76771	0	-Inf	AT5G02630 (E=1e-117) | LOCATED IN: endomembrane system, integral to membrane; EXPRESSED IN: 21 plant structures; EXPRESSED DURING: 13 growth stages; CONTAINS InterPro DOMAIN/s: Transmembrane receptor, eukaryota (InterPro:IPR009637); BEST Arabidopsis thaliana protein match is: unknown protein (TAIR:AT5G18520.1); Has 344 Blast hits to 343 proteins in 73 species: Archae - 0; Bacteria - 0; Metazoa - …
Bra005759	A03:462204-463146	3.32138	0	-Inf	5.00546	0	-Inf	AT5G02590 (E=4e-086) | chloroplast lumen common family protein
Bra005776	A03:538543-541103	0.116436	0	-Inf	0.0543474	0	-Inf	AT5G03670 (E=3e-167) | unknown protein
Bra005807	A03:733445-737784	0.289772	0	-Inf	0.0961297	0	-Inf	AT5G04440 (E=4e-031) | unknown protein
Bra005808	A03:738548-739334	0.271405	0	-Inf	0.0898209	0	-Inf	AT5G04470 (E=6e-009) SIM | SIM (SIAMESE); cyclin-dependent protein kinase inhibitor
Bra005811	A03:755274-756786	0.197201	0	-Inf	0.15985	0	-Inf	AT5G04660 (E=2e-244) CYP77A4 | CYP77A4; electron carrier/ heme binding / iron ion binding / monooxygenase/ oxygen binding
Bra005814	A03:761806-765546	0.0592382	0	-Inf	0.0474424	0	-Inf	AT5G04700 (E=0.0) | FUNCTIONS IN: molecular_function unknown; INVOLVED IN: biological_process unknown; LOCATED IN: cellular_component unknown; CONTAINS InterPro DOMAIN/s: Ankyrin (InterPro:IPR002110); BEST Arabidopsis thaliana protein match is: unknown protein (TAIR:AT5G04680.1); Has 868 Blast hits to 744 proteins in 75 species: Archae - 0; Bacteria - 22; Metazoa - 164; Fungi - 15; Plants - 471; …
Bra005817	A03:776459-777276	77.7078	0	-Inf	199.449	0	-Inf	AT5G04750 (E=3e-020) | F1F0-ATPase inhibitor protein, putative
Bra005819	A03:782695-785700	0.0260616	0	-Inf	0.0334182	0	-Inf	AT5G04770 (E=4e-275) ATCAT6, CAT6 | CAT6 (CATIONIC AMINO ACID TRANSPORTER 6); amino acid transmembrane transporter/ basic amino acid transmembrane transporter/ cationic amino acid transmembrane transporter
Bra005821	A03:790476-794224	0.0795893	0	-Inf	0.265196	0	-Inf	AT5G04780 (E=3e-301) | INVOLVED IN: biological_process unknown; LOCATED IN: chloroplast; CONTAINS InterPro DOMAIN/s: Pentatricopeptide repeat (InterPro:IPR002885); BEST Arabidopsis thaliana protein match is: MEF1 (MITOCHONDRIAL RNA EDITING FACTOR 1) (TAIR:AT5G52630.1); Has 13798 Blast hits to 4918 proteins in 150 species: Archae - 0; Bacteria - 4; Metazoa - 59; Fungi - 36; Plants - 13447; Viruses…
Bra005826	A03:808233-809376	0.274765	0	-Inf	0.35374	0	-Inf	AT5G04890 (E=4e-080) RTM2 | RTM2 (RESTRICTED TEV MOVEMENT 2)
Bra005838	A03:870407-871738	6.74113	0	-Inf	6.37858	0	-Inf	AT5G05100 (E=1e-111) | nucleic acid binding
Bra005847	A03:908747-913948	0.198161	0	-Inf	0.0956768	0	-Inf	AT5G05190 (E=4e-109) | unknown protein
Bra005869	A03:998641-1000637	0.0253188	0	-Inf	0.0162675	0	-Inf	AT5G05880 (E=1e-118) | UDP-glucoronosyl/UDP-glucosyl transferase family protein
Bra005870	A03:1003361-1005416	0.0631969	0	-Inf	0.0135194	0	-Inf	AT2G30750 (E=2e-080) CYP71A12 | CYP71A12 (cytochrome P450, family 71, subfamily A, polypeptide 12); electron carrier/ heme binding / iron ion binding / monooxygenase/ oxygen binding
Bra005872	A03:1010730-1012238	1.82526	0	-Inf	1.61557	0	-Inf	AT5G05987 (E=5e-099) PRA1.A2 | PRA1.A2 (PRENYLATED RAB ACCEPTOR 1.A2)
Bra005873	A03:1012596-1013564	0.151555	0	-Inf	0.947693	0	-Inf	AT5G05990 (E=1e-099) | mitochondrial glycoprotein family protein / MAM33 family protein
Bra005881	A03:1040361-1041963	7.71873	0	-Inf	13.9111	0	-Inf	AT2G47990 (E=4e-225) SWA1, EDA13, EDA19 | SWA1 (SLOW WALKER1); nucleotide binding
Bra005882	A03:1042411-1045341	0.284381	0	-Inf	0.430111	0	-Inf	AT5G06160 (E=1e-212) ATO | ATO (ATROPOS); nucleic acid binding / zinc ion binding
Bra005890	A03:1082933-1083374	4.19349	0	-Inf	16.7511	0	-Inf	AT5G06280 (E=5e-031) | unknown protein
Bra005898	A03:1098998-1099742	0.30298	0	-Inf	0.285429	0	-Inf	AT5G06470 (E=4e-094) | glutaredoxin family protein
Bra005913	A03:1187894-1197699	0.0133073	0	-Inf	0.0170451	0	-Inf	AT5G06820 (E=1e-157) SRF2 | SRF2 (STRUBBELIG-RECEPTOR FAMILY 2); ATP binding / kinase/ protein serine/threonine kinase
Bra005919	A03:1212971-1221530	1.61988	0	-Inf	0.395682	0	-Inf	AT5G06870 (E=3e-121) PGIP2, ATPGIP2 | PGIP2 (POLYGALACTURONASE INHIBITING PROTEIN 2); protein binding
Bra005927	A03:1251909-1253082	0.91183	0	-Inf	0.117523	0	-Inf	AT5G07200 (E=5e-165) YAP169, GA20OX3, ATGA20OX3 | YAP169; gibberellin 20-oxidase
Bra005929	A03:1272763-1276124	33.1464	0	-Inf	18.7436	0	-Inf	AT5G07240 (E=3e-036) IQD24 | IQD24 (IQ-domain 24); calmodulin binding
Bra005936	A03:1307289-1310649	2.32463	0	-Inf	1.37433	0	-Inf	AT5G07460 (E=2e-105) PMSR2, ATMSRA2 | PMSR2 (PEPTIDEMETHIONINE SULFOXIDE REDUCTASE 2); oxidoreductase, acting on sulfur group of donors, disulfide as acceptor / peptide-methionine-(S)-S-oxide reductase
Bra005947	A03:1349025-1354460	0.291057	0	-Inf	0.348059	0	-Inf	AT5G07610 (E=1e-141) | F-box family protein
Bra005949	A03:1364308-1365719	0.0358597	0	-Inf	0.0924213	0	-Inf	AT5G07700 (E=1e-108) MYB76, AtMYB76 | MYB76 (myb domain protein 76); DNA binding / transcription factor
Bra005953	A03:1381588-1385072	0.300259	0	-Inf	0.224686	0	-Inf	AT5G07790 (E=2e-071) | unknown protein
Bra005955	A03:1394022-1395444	0.0447866	0	-Inf	0.0287531	0	-Inf	AT5G07820 (E=1e-057) | FUNCTIONS IN: molecular_function unknown; INVOLVED IN: biological_process unknown; LOCATED IN: cellular_component unknown; EXPRESSED IN: 11 plant structures; EXPRESSED DURING: 8 growth stages; CONTAINS InterPro DOMAIN/s: Calmodulin-binding, plant (InterPro:IPR012417); BEST Arabidopsis thaliana protein match is: chromosome scaffold protein-related (TAIR:AT5G61260.1); Has 109…
Bra005957	A03:1410182-1410755	2.6158	0	-Inf	1.70936	0	-Inf	AT5G07870 (E=2e-079) | transferase family protein
Bra005970	A03:1452654-1453527	9.91566	0	-Inf	5.87258	0	-Inf	AT5G08139 (E=1e-052) | zinc finger (C3HC4-type RING finger) family protein
Bra005977	A03:1473145-1474887	1.1836	0	-Inf	0.530872	0	-Inf	AT5G08200 (E=2e-166) | peptidoglycan-binding LysM domain-containing protein
Bra005980	A03:1484738-1487023	8.01303	0	-Inf	2.7733	0	-Inf	AT5G08280 (E=1e-188) HEMC | HEMC (HYDROXYMETHYLBILANE SYNTHASE); hydroxymethylbilane synthase
Bra005983	A03:1495222-1496824	0.145089	0	-Inf	0.421923	0	-Inf	AT5G08310 (E=5e-226) | pentatricopeptide (PPR) repeat-containing protein
Bra005984	A03:1498580-1499285	6.7655	0	-Inf	2.73021	0	-Inf	AT5G08330 (E=2e-059) | TCP family transcription factor, putative
Bra005987	A03:1504844-1505453	2.29111	0	-Inf	0.70854	0	-Inf	AT5G08350 (E=2e-087) | GRAM domain-containing protein / ABA-responsive protein-related
Bra006005	A03:1581062-1586625	0.00434269	0	-Inf	0.00555563	0	-Inf	AT5G27030 (E=1e-306) TPR3 | TPR3 (TOPLESS-RELATED 3)
Bra006045	A03:1734633-1738707	1.1242	0	-Inf	2.07086	0	-Inf	AT5G10060 (E=5e-172) | FUNCTIONS IN: molecular_function unknown; INVOLVED IN: biological_process unknown; LOCATED IN: endomembrane system; CONTAINS InterPro DOMAIN/s: Protein of unknown function DUF618 (InterPro:IPR006903), Regulation of nuclear pre-mRNA protein (InterPro:IPR006569), ENTH/VHS (InterPro:IPR008942); BEST Arabidopsis thaliana protein match is: unknown protein (TAIR:AT5G65180.1); Has…
Bra006049	A03:1760224-1767979	0.367202	0	-Inf	1.56452	0	-Inf	None
Bra006059	A03:1804029-1806659	0.26999	0	-Inf	0.0831826	0	-Inf	AT5G44050 (E=7e-233) | MATE efflux family protein
Bra006072	A03:1868509-1869143	3.81344	0	-Inf	8.88533	0	-Inf	AT5G10700 (E=3e-082) | aminoacyl-tRNA hydrolase/ protein tyrosine phosphatase
Bra006077	A03:1887406-1888318	2.81147	0	-Inf	3.62749	0	-Inf	AT5G10750 (E=4e-162) | unknown protein
Bra006082	A03:1905120-1906515	3.99726	0	-Inf	5.20174	0	-Inf	AT5G10950 (E=2e-022) | cylicin-related
Bra006086	A03:1928417-1928807	8.82655	0	-Inf	8.06816	0	-Inf	AT5G11070 (E=1e-039) | unknown protein
Bra006090	A03:1946331-1950683	0.734026	0	-Inf	1.09468	0	-Inf	AT5G11110 (E=0.0) SPS1, ATSPS2F, KNS2 | ATSPS2F (SUCROSE PHOSPHATE SYNTHASE 2F); sucrose-phosphate synthase
Bra006092	A03:1958152-1959205	0.496165	0	-Inf	0.74539	0	-Inf	AT5G25400 (E=2e-166) | phosphate translocator-related
Bra006102	A03:2009663-2013643	0.0453099	0	-Inf	0.00725076	0	-Inf	AT5G11510 (E=2e-099) MYB3R-4, AtMYB3R4 | MYB3R-4 (myb domain protein 3R-4); DNA binding / transcription coactivator/ transcription factor
Bra006113	A03:2076330-2077727	1.82854	0	-Inf	0.933347	0	-Inf	AT5G11730 (E=9e-184) | unknown protein
Bra006125	A03:2126276-2127122	4.29084	0	-Inf	4.25956	0	-Inf	AT5G11890 (E=2e-102) | FUNCTIONS IN: molecular_function unknown; LOCATED IN: plasma membrane; EXPRESSED IN: 12 plant structures; EXPRESSED DURING: 6 growth stages; CONTAINS InterPro DOMAIN/s: Harpin-induced 1 (InterPro:IPR010847); BEST Arabidopsis thaliana protein match is: unknown protein (TAIR:AT1G17620.1); Has 455 Blast hits to 454 proteins in 19 species: Archae - 0; Bacteria - 0; Metazoa - 0;…
Bra006135	A03:2158285-2158606	32.3112	0	-Inf	56.8544	0	-Inf	AT5G11970 (E=1e-048) | unknown protein
Bra006137	A03:2172207-2172630	2.57874	0	-Inf	13.3256	0	-Inf	AT5G12020 (E=9e-061) HSP17.6II | HSP17.6II (17.6 KDA CLASS II HEAT SHOCK PROTEIN)
Bra006139	A03:2176920-2177895	4.8744	0	-Inf	0.806117	0	-Inf	AT5G12050 (E=2e-054) | unknown protein
Bra006162	A03:2301806-2302621	0.051491	0	-Inf	0.13514	0	-Inf	AT5G12420 (E=5e-078) | unknown protein
Bra006166	A03:2319152-2321109	0.0454072	0	-Inf	0.0293323	0	-Inf	AT5G12870 (E=5e-120) ATMYB46, MYB46 | MYB46 (MYB DOMAIN PROTEIN 46); DNA binding / transcription factor
Bra006171	A03:2336885-2340720	0.0947728	0	-Inf	0.0856398	0	-Inf	AT5G12950 (E=0.0) | catalytic
Bra006173	A03:2344697-2347160	0.184666	0	-Inf	0.317735	0	-Inf	AT5G12980 (E=6e-129) | rcd1-like cell differentiation protein, putative
Bra006178	A03:2366854-2367892	1.94229	0	-Inf	2.06745	0	-Inf	AT5G13080 (E=4e-067) WRKY75, ATWRKY75 | WRKY75; transcription factor
Bra006179	A03:2370453-2371113	15.199	0	-Inf	15.208	0	-Inf	AT1G24270 (E=3e-025) | unknown protein
Bra006180	A03:2377783-2379106	0.193219	0	-Inf	0.248748	0	-Inf	AT5G13100 (E=9e-165) | unknown protein
Bra006181	A03:2379721-2382401	0.36391	0	-Inf	0.618488	0	-Inf	AT5G13110 (E=5e-308) G6PD2 | G6PD2 (GLUCOSE-6-PHOSPHATE DEHYDROGENASE 2); glucose-6-phosphate dehydrogenase
Bra006192	A03:2451512-2452406	0.13666	0	-Inf	0.0444145	0	-Inf	AT5G13290 (E=2e-113) SOL2, CRN | CRN (CORYNE); ATP binding / kinase/ protein kinase
Bra006219	A03:2582898-2585489	0.205714	0	-Inf	0.0416976	0	-Inf	AT5G13840 (E=2e-235) FZR3 | FZR3 (FIZZY-RELATED 3); signal transducer
Bra006225	A03:2598382-2599039	5.6263	0	-Inf	7.79772	0	-Inf	AT5G13950 (E=1e-069) | unknown protein
Bra006229	A03:2618728-2619577	0.95733	0	-Inf	1.486	0	-Inf	AT5G14000 (E=2e-084) anac084 | anac084 (Arabidopsis NAC domain containing protein 84); transcription factor
Bra006234	A03:2632638-2634473	5.08433	0	-Inf	9.42921	0	-Inf	AT5G14040 (E=7e-163) | mitochondrial phosphate transporter
Bra006236	A03:2643186-2643597	0.290627	0	-Inf	0.13011	0	-Inf	AT5G14070 (E=2e-064) ROXY2 | ROXY2; electron carrier/ protein disulfide oxidoreductase
Bra006250	A03:2692864-2693518	9.70285	0	-Inf	13.3243	0	-Inf	AT3G46610 (E=5e-105) | pentatricopeptide (PPR) repeat-containing protein
Bra006256	A03:2714294-2715717	0.41801	0	-Inf	0.834289	0	-Inf	AT5G14480 (E=8e-218) | glycosyl transferase family 17 protein
Bra006259	A03:2726009-2727079	0.0181589	0	-Inf	0.0234034	0	-Inf	AT5G14510 (E=1e-149) | armadillo/beta-catenin repeat family protein
Bra006278	A03:2745379-3038533	3.12685	0	-Inf	4.26554	0	-Inf	AT5G15080 (E=5e-221) | protein kinase, putative
Bra006288	A03:2745379-3038533	0.176737	0	-Inf	1.46356	0	-Inf	AT5G15190 (E=1e-028) | unknown protein
Bra006292	A03:2745379-3038533	1.09734	0	-Inf	2.19667	0	-Inf	AT5G15260 (E=1e-056) | structural constituent of ribosome
Bra006296	A03:2745379-3038533	2.46196	0	-Inf	0.164536	0	-Inf	AT5G15310 (E=2e-148) ATMYB16, ATMIXTA | ATMYB16 (MYB DOMAIN PROTEIN 16); DNA binding / transcription factor
Bra006311	A03:2745379-3038533	0.952874	0	-Inf	0.0731652	0	-Inf	AT4G22390 (E=5e-140) | FUNCTIONS IN: molecular_function unknown; INVOLVED IN: biological_process unknown; LOCATED IN: cellular_component unknown; CONTAINS InterPro DOMAIN/s: F-box associated type 1 (InterPro:IPR017451); BEST Arabidopsis thaliana protein match is: F-box family protein (TAIR:AT4G12560.2); Has 662 Blast hits to 662 proteins in 37 species: Archae - 0; Bacteria - 0; Metazoa - 0; Fungi…
Bra006317	A03:2745379-3038533	3.66917	0	-Inf	2.26928	0	-Inf	AT5G15710 (E=1e-223) | F-box family protein
Bra006321	A03:2745379-3038533	0.0547577	0	-Inf	0.0354524	0	-Inf	AT5G15790 (E=2e-098) | zinc finger (C3HC4-type RING finger) family protein
Bra006324	A03:2745379-3038533	0.72025	0	-Inf	0.314453	0	-Inf	AT5G15830 (E=3e-049) AtbZIP3 | AtbZIP3 (Arabidopsis thaliana basic leucine-zipper 3); DNA binding / transcription factor
Bra006336	A03:3073450-3074357	2.55157	0	-Inf	1.41808	0	-Inf	AT5G16010 (E=2e-103) | 3-oxo-5-alpha-steroid 4-dehydrogenase family protein / steroid 5-alpha-reductase family protein
Bra006345	A03:3114339-3114885	0.240069	0	-Inf	0.0628884	0	-Inf	AT5G16250 (E=6e-076) | unknown protein
Bra006357	A03:3154988-3155309	218.742	0	-Inf	464.911	0	-Inf	AT5G16470 (E=7e-054) | zinc finger (C2H2 type) family protein
Bra006368	A03:3204746-3205715	0.296865	0	-Inf	0.550108	0	-Inf	AT5G16760 (E=7e-148) | inositol 1,3,4-trisphosphate 5/6-kinase
Bra006374	A03:3242791-3245124	0.0796453	0	-Inf	0.0113485	0	-Inf	AT2G20800 (E=4e-291) NDB4 | NDB4 (NAD(P)H dehydrogenase B4); NADH dehydrogenase
Bra006380	A03:3265777-3266089	32.0413	0	-Inf	72.4044	0	-Inf	AT5G16950 (E=1e-043) | unknown protein
Bra006381	A03:3266440-3268757	0.175152	0	-Inf	0.0321505	0	-Inf	AT5G16990 (E=2e-167) | NADP-dependent oxidoreductase, putative
Bra006386	A03:3292729-3294015	3.25793	0	-Inf	0.246379	0	-Inf	AT5G17090 (E=3e-038) | FUNCTIONS IN: molecular_function unknown; INVOLVED IN: biological_process unknown; LOCATED IN: cellular_component unknown; CONTAINS InterPro DOMAIN/s: Cystatin-related, plant (InterPro:IPR006525); BEST Arabidopsis thaliana protein match is: unknown protein (TAIR:AT5G17120.1); Has 28 Blast hits to 26 proteins in 1 species: Archae - 0; Bacteria - 0; Metazoa - 0; Fungi - 0; Pl…
Bra006390	A03:3302607-3305021	0.104887	0	-Inf	0.156915	0	-Inf	AT5G17160 (E=3e-117) | unknown protein
Bra006401	A03:3358276-3358888	0.115446	0	-Inf	0.0501437	0	-Inf	AT5G17350 (E=5e-069) | unknown protein
Bra006403	A03:3367779-3368403	1.8942	0	-Inf	0.0967228	0	-Inf	AT5G17350 (E=8e-067) | unknown protein
Bra006408	A03:3387762-3388886	0.258933	0	-Inf	0.394633	0	-Inf	AT5G17440 (E=3e-046) | LUC7 N_terminus domain-containing protein
Bra006412	A03:3402927-3404788	0.0224523	0	-Inf	0.0576585	0	-Inf	AT5G17540 (E=6e-204) | transferase family protein
Bra006415	A03:3412332-3413322	7.00416	0	-Inf	2.11155	0	-Inf	AT5G17600 (E=2e-051) | zinc finger (C3HC4-type RING finger) family protein
Bra006430	A03:3482382-3482661	3.94862	0	-Inf	1.61769	0	-Inf	AT5G18010 (E=6e-040) | auxin-responsive protein, putative
Bra006431	A03:3483484-3483769	0.990427	0	-Inf	3.54231	0	-Inf	AT5G18080 (E=2e-032) | auxin-responsive protein, putative
Bra006433	A03:3485430-3493205	2.88422	0	-Inf	1.17399	0	-Inf	AT5G18020 (E=4e-036) | auxin-responsive protein, putative
Bra006437	A03:3485430-3493205	0.232873	0	-Inf	0.366845	0	-Inf	AT5G18070 (E=9e-142) DRT101 | DRT101 (DNA-DAMAGE-REPAIR/TOLERATION 101); intramolecular transferase, phosphotransferases / magnesium ion binding
Bra006454	A03:3563489-3563930	120.029	0	-Inf	197.682	0	-Inf	AT5G18380 (E=2e-073) | 40S ribosomal protein S16 (RPS16C)
Bra006458	A03:3578444-3580087	0.101196	0	-Inf	0.0217219	0	-Inf	AT1G63730 (E=1e-050) | disease resistance protein (TIR-NBS-LRR class), putative
Bra006462	A03:3590405-3594300	3.07748	0	-Inf	2.72167	0	-Inf	AT5G18480 (E=6e-248) PGSIP6 | PGSIP6 (PLANT GLYCOGENIN-LIKE STARCH INITIATION PROTEIN 6); transferase, transferring glycosyl groups / transferase, transferring hexosyl groups
Bra006464	A03:3599431-3600739	1.13184	0	-Inf	2.3332	0	-Inf	AT5G18520 (E=2e-193) | LOCATED IN: endomembrane system, integral to membrane; EXPRESSED IN: 24 plant structures; EXPRESSED DURING: 14 growth stages; CONTAINS InterPro DOMAIN/s: Transmembrane receptor, eukaryota (InterPro:IPR009637); BEST Arabidopsis thaliana protein match is: unknown protein (TAIR:AT3G09570.1); Has 385 Blast hits to 381 proteins in 83 species: Archae - 0; Bacteria - 2; Metazoa - …
Bra006465	A03:3604452-3606720	0.0517125	0	-Inf	0.0498455	0	-Inf	AT5G18550 (E=5e-170) | nucleic acid binding / zinc ion binding
Bra006467	A03:3626819-3627128	13.1156	0	-Inf	12.356	0	-Inf	AT5G18600 (E=4e-052) | glutaredoxin family protein
Bra006475	A03:3668743-3674074	0.0121149	0	-Inf	0.0103308	0	-Inf	AT5G18700 (E=0.0) EMB3013 | EMB3013 (embryo defective 3013); ATP binding / binding / kinase/ protein kinase/ protein serine/threonine kinase
Bra006482	A03:3713625-3716912	11.8103	0	-Inf	7.489	0	-Inf	AT5G18850 (E=4e-030) | unknown protein
Bra006485	A03:3719699-3720740	0.285591	0	-Inf	0.0865422	0	-Inf	AT5G18930 (E=3e-166) BUD2, SAMDC4 | BUD2 (BUSHY AND DWARF 2); adenosylmethionine decarboxylase
Bra006498	A03:3797142-3797689	14.7464	0	-Inf	0.755777	0	-Inf	AT5G19190 (E=4e-060) | unknown protein
Bra006524	A03:3906164-3907361	8.00315	0	-Inf	7.70944	0	-Inf	AT5G19900 (E=3e-080) | PRLI-interacting factor, putative
Bra006528	A03:3927190-3928204	0.48768	0	-Inf	1.36874	0	-Inf	AT5G19980 (E=1e-147) | integral membrane family protein
Bra006543	A03:3977990-3978855	8.61601	0	-Inf	6.36753	0	-Inf	AT5G20150 (E=5e-103) ATSPX1, SPX1 | SPX1 (SPX DOMAIN GENE 1)
Bra006550	A03:4000388-4005339	0.0708727	0	-Inf	0.0729169	0	-Inf	AT5G20260 (E=2e-144) | catalytic
Bra006571	A03:4097236-4104099	0.180803	0	-Inf	0.811238	0	-Inf	AT5G20680 (E=3e-213) | unknown protein
Bra006575	A03:4114649-4115225	7.76798	0	-Inf	9.86584	0	-Inf	AT5G20790 (E=4e-056) | unknown protein
Bra006581	A03:4146919-4148508	0.0929582	0	-Inf	0.172327	0	-Inf	AT5G20870 (E=2e-238) | glycosyl hydrolase family 17 protein
Bra006585	A03:4166190-4172015	3.61207	0	-Inf	3.54136	0	-Inf	AT5G20910 (E=1e-125) | zinc finger (C3HC4-type RING finger) family protein
Bra006587	A03:4166190-4172015	0.839718	0	-Inf	0.309527	0	-Inf	AT5G20940 (E=6e-226) | glycosyl hydrolase family 3 protein
Bra006588	A03:4173137-4178842	0.587895	0	-Inf	1.04401	0	-Inf	AT5G20970 (E=8e-056) | heat shock family protein
Bra006592	A03:4188091-4189241	0.0512055	0	-Inf	0.0219852	0	-Inf	AT5G21050 (E=1e-102) | LOCATED IN: chloroplast; EXPRESSED IN: 14 plant structures; EXPRESSED DURING: 8 growth stages; CONTAINS InterPro DOMAIN/s: Hyccin (InterPro:IPR018619); BEST Arabidopsis thaliana protein match is: unknown protein (TAIR:AT5G64090.1); Has 170 Blast hits to 170 proteins in 49 species: Archae - 0; Bacteria - 0; Metazoa - 133; Fungi - 0; Plants - 30; Viruses - 0; Other Eukaryotes…
Bra006598	A03:4205310-4206215	2.74058	0	-Inf	1.15924	0	-Inf	AT5G21940 (E=8e-057) | unknown protein
Bra006608	A03:4240931-4242751	4.81995	0	-Inf	6.40018	0	-Inf	AT3G44110 (E=7e-153) ATJ3, ATJ | ATJ3; protein binding
Bra006616	A03:4285552-4290332	0.0742025	0	-Inf	0.723435	0	-Inf	AT5G22250 (E=5e-122) | CCR4-NOT transcription complex protein, putative
Bra006620	A03:4303098-4304630	0.867473	0	-Inf	0.305273	0	-Inf	AT5G22310 (E=3e-124) | unknown protein
Bra006635	A03:4396408-4401996	1.01868	0	-Inf	0.507269	0	-Inf	AT5G22760 (E=0.0) | PHD finger family protein
Bra006639	A03:4414827-4625728	5.28024	0	-Inf	14.8981	0	-Inf	AT5G22880 (E=2e-046) H2B, HTB2 | HTB2; DNA binding
Bra006640	A03:4414827-4625728	0.120307	0	-Inf	0.10013	0	-Inf	AT5G22910 (E=0.0) ATCHX9, CHX9 | ATCHX9; monovalent cation:proton antiporter/ sodium:hydrogen antiporter
Bra006644	A03:4414827-4625728	0.356457	0	-Inf	0.0885999	0	-Inf	AT5G22940 (E=5e-216) F8H | F8H (FRA8 HOMOLOG); catalytic
Bra006649	A03:4414827-4625728	0.0359016	0	-Inf	0.00919974	0	-Inf	AT5G60720 (E=1e-294) | unknown protein
Bra006654	A03:4414827-4625728	0.106321	0	-Inf	0.143402	0	-Inf	AT5G60590 (E=9e-052) | yrdC protein-related
Bra006659	A03:4414827-4625728	64.3365	0	-Inf	100.427	0	-Inf	AT5G60460 (E=4e-022) | sec61beta family protein
Bra006660	A03:4414827-4625728	5.05292	0	-Inf	5.52895	0	-Inf	AT5G60400 (E=5e-024) | unknown protein
Bra006664	A03:4414827-4625728	32.6392	0	-Inf	27.9401	0	-Inf	AT3G01280 (E=5e-137) VDAC1, ATVDAC1 | VDAC1 (VOLTAGE DEPENDENT ANION CHANNEL 1); voltage-gated anion channel
Bra006665	A03:4414827-4625728	7.89356	0	-Inf	16.7472	0	-Inf	AT5G60340 (E=1e-040) | maoC-like dehydratase domain-containing protein
Bra006668	A03:4414827-4625728	0.0810304	0	-Inf	0.122708	0	-Inf	AT5G60320 (E=8e-301) | lectin protein kinase family protein
Bra006669	A03:4414827-4625728	0.24606	0	-Inf	0.32396	0	-Inf	AT5G60300 (E=2e-302) | lectin protein kinase family protein
Bra006670	A03:4414827-4625728	2.42972	0	-Inf	1.03145	0	-Inf	AT5G60270 (E=6e-291) | lectin protein kinase family protein
Bra006671	A03:4414827-4625728	0.00774093	0	-Inf	0.00992093	0	-Inf	AT5G60250 (E=1e-181) | zinc finger (C3HC4-type RING finger) family protein
Bra006672	A03:4414827-4625728	0.326308	0	-Inf	0.493036	0	-Inf	AT5G60230 (E=1e-123) SEN2, ATSEN2 | SEN2 (splicing endonuclease 2); nuclease/ tRNA-intron endonuclease
Bra006683	A03:4414827-4625728	0.150754	0	-Inf	0.0117935	0	-Inf	AT5G60020 (E=8e-310) LAC17, ATLAC17 | LAC17 (laccase 17); laccase
Bra006685	A03:4414827-4625728	14.8118	0	-Inf	34.1275	0	-Inf	AT5G22880 (E=2e-046) H2B, HTB2 | HTB2; DNA binding
Bra006696	A03:4681999-4683862	2.49616	0	-Inf	6.83438	0	-Inf	AT5G59730 (E=1e-264) ATEXO70H7 | ATEXO70H7 (EXOCYST SUBUNIT EXO70 FAMILY PROTEIN H7); protein binding
Bra006699	A03:4696676-4696988	27.5911	0	-Inf	28.878	0	-Inf	AT5G59690 (E=3e-041) | histone H4
Bra006707	A03:4730478-4731935	0.552097	0	-Inf	0.354704	0	-Inf	AT5G59590 (E=1e-106) UGT76E2 | UGT76E2 (UDP-GLUCOSYL TRANSFERASE 76E2); UDP-glycosyltransferase/ quercetin 3-O-glucosyltransferase/ quercetin 7-O-glucosyltransferase
Bra006709	A03:4736720-4737902	2.60811	0	-Inf	3.39064	0	-Inf	AT5G59550 (E=1e-132) | zinc finger (C3HC4-type RING finger) family protein
Bra006714	A03:4761045-4762127	0.074935	0	-Inf	2.97649	0	-Inf	AT5G59530 (E=3e-082) | 2-oxoglutarate-dependent dioxygenase, putative
Bra006739	A03:4852459-4853776	0.123299	0	-Inf	0.110889	0	-Inf	AT5G58930 (E=1e-118) | unknown protein
Bra006752	A03:4909545-4910472	0.632248	0	-Inf	0.993951	0	-Inf	AT5G58580 (E=9e-070) ATL63 | ATL63 (ARABIDOPSIS TO&#769;XICOS EN LEVADURA); protein binding / zinc ion binding
Bra006756	A03:4922838-4925477	14.2329	0	-Inf	6.15074	0	-Inf	AT4G22100 (E=6e-223) BGLU3 | BGLU3 (BETA GLUCOSIDASE 2); catalytic/ cation binding / hydrolase, hydrolyzing O-glycosyl compounds
Bra006778	A03:5017332-5018140	2.10039	0	-Inf	1.50247	0	-Inf	AT5G58250 (E=2e-075) | unknown protein
Bra006780	A03:5023450-5025860	0.0409183	0	-Inf	0.105024	0	-Inf	AT5G58190 (E=1e-193) ECT10 | ECT10
Bra006781	A03:5029285-5031607	0.438391	0	-Inf	0.248625	0	-Inf	AT5G58150 (E=5e-305) | leucine-rich repeat transmembrane protein kinase, putative
Bra006784	A03:5039844-5040495	48.3042	0	-Inf	59.6359	0	-Inf	AT5G58070 (E=4e-097) ATTIL, TIL | TIL (TEMPERATURE-INDUCED LIPOCALIN); binding / transporter
Bra006791	A03:5062544-5064734	1.88805	0	-Inf	0.282634	0	-Inf	AT5G57980 (E=1e-090) RPB5C | RPB5C (RNA POLYMERASE II FIFTH LARGEST SUBUNIT, C); DNA binding / DNA-directed RNA polymerase
Bra006798	A03:5077013-5078184	1.99426	0	-Inf	1.20916	0	-Inf	AT5G57830 (E=4e-044) | unknown protein
Bra006800	A03:5085331-5085887	0.244267	0	-Inf	0.0805497	0	-Inf	AT5G57830 (E=3e-032) | unknown protein
Bra006813	A03:5157315-5161702	0.0344863	0	-Inf	0.00735861	0	-Inf	AT5G57590 (E=0.0) BIO1 | BIO1 (biotin auxotroph 1); adenosylmethionine-8-amino-7-oxononanoate transaminase
Bra006815	A03:5166738-5167191	0.589508	0	-Inf	0.391381	0	-Inf	AT5G57520 (E=9e-071) ZFP2, ATZFP2 | ZFP2 (ZINC FINGER PROTEIN 2); nucleic acid binding / transcription factor/ zinc ion binding
Bra006820	A03:5190501-5192164	0.196402	0	-Inf	0.690229	0	-Inf	AT5G57450 (E=3e-126) XRCC3, ATXRCC3 | XRCC3; ATP binding / damaged DNA binding / protein binding / single-stranded DNA binding
Bra006824	A03:5210337-5211944	0.183129	0	-Inf	0.207428	0	-Inf	AT5G57380 (E=1e-123) VIN3 | VIN3 (VERNALIZATION INSENSITIVE 3); protein binding / zinc ion binding
Bra006833	A03:5260642-5262374	1.74347	0	-Inf	0.638023	0	-Inf	AT5G57100 (E=2e-163) | transporter-related
Bra006848	A03:5330225-5331101	0.0428947	0	-Inf	0.0276905	0	-Inf	AT1G10000 (E=1e-008) | nucleic acid binding / ribonuclease H
Bra006862	A03:5391021-5392989	0.174244	0	-Inf	0.165045	0	-Inf	AT5G01560 (E=8e-269) LECRKA4.3 | LECRKA4.3 (LECTIN RECEPTOR KINASE A4.3); kinase
Bra006873	A09:25916037-25918665	9.62428	0	-Inf	10.6742	0	-Inf	AT5G39000 (E=0.0) | protein kinase family protein
Bra006874	A09:25920350-25921174	2.61046	0	-Inf	3.41603	0	-Inf	AT3G51760 (E=2e-102) | unknown protein
Bra006876	A09:25928577-25929871	5.58407	0	-Inf	17.4628	0	-Inf	AT3G51780 (E=4e-105) ATBAG4 | ATBAG4 (ARABIDOPSIS THALIANA BCL-2-ASSOCIATED ATHANOGENE 4); protein binding
Bra006883	A09:25995443-25996718	0.0385506	0	-Inf	0.0495429	0	-Inf	AT3G51930 (E=4e-183) | transducin family protein / WD-40 repeat family protein
Bra006899	A09:26046289-26047778	0.033599	0	-Inf	0.0216355	0	-Inf	AT3G52110 (E=4e-125) | unknown protein
Bra006904	A09:26074453-26075434	0.483297	0	-Inf	0.417202	0	-Inf	AT3G52150 (E=3e-104) | RNA recognition motif (RRM)-containing protein
Bra006917	A09:26138919-26140143	0.23025	0	-Inf	0.322446	0	-Inf	AT3G52320 (E=4e-078) | F-box family protein
Bra006929	A09:26282350-26285003	0.0123263	0	-Inf	0.0631377	0	-Inf	AT3G52490 (E=2e-221) | heat shock protein-related
Bra006941	A09:26378038-26378869	1.06709	0	-Inf	0.719489	0	-Inf	AT3G52710 (E=4e-082) | unknown protein
Bra006943	A09:26390505-26391425	17.3225	0	-Inf	13.1058	0	-Inf	AT3G52740 (E=2e-050) | unknown protein
Bra006962	A09:26538892-26540509	0.0382564	0	-Inf	0.0122696	0	-Inf	AT3G52950 (E=3e-189) | CBS domain-containing protein / octicosapeptide/Phox/Bemp1 (PB1) domain-containing protein
Bra006963	A09:26552362-26553348	67.4433	0	-Inf	92.365	0	-Inf	AT3G52960 (E=4e-085) | peroxiredoxin type 2, putative
Bra006964	A09:26555481-26557188	0.0384288	0	-Inf	0.0246504	0	-Inf	AT5G44400 (E=9e-223) | FAD-binding domain-containing protein
Bra006972	A09:26587946-26589452	0.187736	0	-Inf	0.040159	0	-Inf	AT3G53150 (E=1e-209) UGT73D1 | UGT73D1 (UDP-glucosyl transferase 73D1); UDP-glycosyltransferase/ transferase, transferring hexosyl groups
Bra006978	A09:26632631-26636238	0.219471	0	-Inf	0.235439	0	-Inf	AT3G53230 (E=0.0) | cell division cycle protein 48, putative / CDC48, putative
Bra006993	A09:26712908-26715206	0.310523	0	-Inf	0.340865	0	-Inf	AT3G53360 (E=0.0) | pentatricopeptide (PPR) repeat-containing protein
Bra006996	A09:26733449-26734740	0.596429	0	-Inf	0.708463	0	-Inf	AT3G53400 (E=2e-092) | FUNCTIONS IN: molecular_function unknown; INVOLVED IN: biological_process unknown; BEST Arabidopsis thaliana protein match is: CPUORF47 (CONSERVED PEPTIDE UPSTREAM OPEN READING FRAME 47) (TAIR:AT5G03190.1); Has 120 Blast hits to 120 proteins in 12 species: Archae - 0; Bacteria - 0; Metazoa - 0; Fungi - 0; Plants - 115; Viruses - 0; Other Eukaryotes - 5 (source: NCBI BLink).
Bra006998	A09:26740971-26741472	70.9329	0	-Inf	150.593	0	-Inf	AT3G53430 (E=6e-088) | 60S ribosomal protein L12 (RPL12B)
Bra007003	A09:26762858-26763330	11.314	0	-Inf	4.89457	0	-Inf	AT3G53470 (E=6e-046) | unknown protein
Bra007009	A09:26792622-26795111	0.537065	0	-Inf	0.242751	0	-Inf	AT3G53540 (E=1e-159) | unknown protein
Bra007011	A09:26819317-26820289	0.443368	0	-Inf	0.404822	0	-Inf	AT3G53560 (E=6e-062) | chloroplast lumen common family protein
Bra007023	A09:26873023-26873335	11.2738	0	-Inf	24.2743	0	-Inf	AT5G59690 (E=3e-041) | histone H4
Bra007024	A09:26874367-26875912	0.283664	0	-Inf	0.0140065	0	-Inf	AT1G16930 (E=8e-090) | F-box family protein
Bra007028	A09:26898109-26899553	2.00181	0	-Inf	4.28546	0	-Inf	AT3G53810 (E=5e-208) | lectin protein kinase, putative
Bra007029	A09:26923950-26924373	0.0889221	0	-Inf	0.71387	0	-Inf	AT3G53820 (E=5e-057) | zinc finger (C2H2 type) family protein
Bra007030	A09:26928387-26931478	0.218941	0	-Inf	0.17671	0	-Inf	AT3G53840 (E=7e-161) | protein kinase family protein
Bra007038	A09:26973788-26975053	0.518149	0	-Inf	0.342404	0	-Inf	AT3G53990 (E=2e-075) | universal stress protein (USP) family protein
Bra007043	A09:27014620-27015640	0.708315	0	-Inf	0.511863	0	-Inf	AT3G54080 (E=1e-093) | sugar binding
Bra007047	A09:27034531-27035428	0.188998	0	-Inf	0.0492364	0	-Inf	AT3G54120 (E=1e-077) | reticulon family protein (RTNLB12)
Bra007054	A09:27062224-27062880	0.352376	0	-Inf	0.863529	0	-Inf	AT3G54200 (E=7e-036) | FUNCTIONS IN: molecular_function unknown; INVOLVED IN: biological_process unknown; LOCATED IN: anchored to plasma membrane, plasma membrane; EXPRESSED IN: 23 plant structures; EXPRESSED DURING: 14 growth stages; CONTAINS InterPro DOMAIN/s: Harpin-induced 1 (InterPro:IPR010847); BEST Arabidopsis thaliana protein match is: unknown protein (TAIR:AT3G05975.1); Has 405 Blast hit…
Bra007062	A09:27111592-27112821	1.24384	0	-Inf	1.64153	0	-Inf	AT3G54290 (E=7e-144) | FUNCTIONS IN: molecular_function unknown; INVOLVED IN: N-terminal protein myristoylation; LOCATED IN: chloroplast; EXPRESSED IN: 23 plant structures; EXPRESSED DURING: 13 growth stages; CONTAINS InterPro DOMAIN/s: Haemerythrin/HHE cation-binding motif (InterPro:IPR012312); Has 35 Blast hits to 35 proteins in 7 species: Archae - 0; Bacteria - 2; Metazoa - 0; Fungi - 0; Plant…
Bra007084	A09:27217005-27218730	1.09733	0	-Inf	1.92924	0	-Inf	AT3G54630 (E=6e-198) | FUNCTIONS IN: molecular_function unknown; INVOLVED IN: biological_process unknown; LOCATED IN: cellular_component unknown; EXPRESSED IN: 11 plant structures; EXPRESSED DURING: 6 growth stages; CONTAINS InterPro DOMAIN/s: Kinetochore protein Ndc80 (InterPro:IPR005550); Has 19800 Blast hits to 12108 proteins in 845 species: Archae - 345; Bacteria - 1709; Metazoa - 11031; Fung…
Bra007092	A09:27260899-27261655	0.912895	0	-Inf	0.660571	0	-Inf	AT4G00026 (E=1e-090) | FUNCTIONS IN: molecular_function unknown; INVOLVED IN: biological_process unknown; LOCATED IN: chloroplast; EXPRESSED IN: cultured cell; CONTAINS InterPro DOMAIN/s: Mitochondrial import inner membrane translocase, subunit Tim21 (InterPro:IPR013261); Has 168 Blast hits to 168 proteins in 84 species: Archae - 0; Bacteria - 0; Metazoa - 92; Fungi - 52; Plants - 20; Viruses - 0…
Bra007100	A09:27320205-27322528	0.154005	0	-Inf	0.483028	0	-Inf	AT3G54820 (E=2e-148) PIP2D, PIP2;5 | PIP2;5 (PLASMA MEMBRANE INTRINSIC PROTEIN 2;5); water channel
Bra007110	A09:27370181-27370706	23.9752	0	-Inf	25.5201	0	-Inf	AT3G54900 (E=5e-063) CXIP1, ATGRXCP | CXIP1 (CAX INTERACTING PROTEIN 1); antiporter/ glutathione disulfide oxidoreductase
Bra007114	A09:27400651-27402054	0.488714	0	-Inf	0.16978	0	-Inf	AT4G10400 (E=3e-121) | F-box family protein
Bra007122	A09:27434090-27436625	0.516086	0	-Inf	0.784127	0	-Inf	AT3G54980 (E=0.0) | pentatricopeptide (PPR) repeat-containing protein
Bra007125	A09:27463415-27465280	0.134249	0	-Inf	0.0695337	0	-Inf	AT3G55005 (E=1e-104) TON1B | TON1B (tonneau 1b)
Bra007129	A09:27476822-27477914	0.664238	0	-Inf	0.369568	0	-Inf	AT3G55030 (E=1e-100) PGPS2 | PGPS2 (phosphatidylglycerolphosphate synthase 2); CDP-alcohol phosphatidyltransferase/ CDP-diacylglycerol-glycerol-3-phosphate 3-phosphatidyltransferase
Bra007142	A09:27538388-27539982	0.349048	0	-Inf	1.04301	0	-Inf	AT3G55120 (E=2e-107) TT5, A11, CFI | TT5 (TRANSPARENT TESTA 5); chalcone isomerase
Bra007146	A09:27557530-27559420	0.00794276	0	-Inf	0.0509039	0	-Inf	AT3G55150 (E=7e-262) ATEXO70H1 | ATEXO70H1 (exocyst subunit EXO70 family protein H1); protein binding
Bra007162	A09:27647385-27649410	0.548155	0	-Inf	0.474505	0	-Inf	AT3G55430 (E=6e-209) | glycosyl hydrolase family 17 protein / beta-1,3-glucanase, putative
Bra007169	A09:27688745-27689814	0.121937	0	-Inf	0.0262228	0	-Inf	AT3G54910 (E=1e-096) | FUNCTIONS IN: molecular_function unknown; INVOLVED IN: biological_process unknown; LOCATED IN: cellular_component unknown; CONTAINS InterPro DOMAIN/s: FBD (InterPro:IPR013596), FBD-like (InterPro:IPR006566), Leucine-rich repeat 2 (InterPro:IPR013101); BEST Arabidopsis thaliana protein match is: F-box family protein (TAIR:AT4G10400.2); Has 661 Blast hits to 647 proteins in 8…
Bra007187	A09:27860568-27862733	0.0254701	0	-Inf	0.049096	0	-Inf	AT3G55740 (E=5e-216) PROT2, ATPROT2 | PROT2 (PROLINE TRANSPORTER 2); L-proline transmembrane transporter/ amino acid transmembrane transporter
Bra007191	A09:27870703-27871036	2.3633	0	-Inf	4.1904	0	-Inf	AT3G55790 (E=3e-008) | unknown protein
Bra007193	A09:27882415-27883021	1.33244	0	-Inf	1.3793	0	-Inf	AT3G55820 (E=2e-059) | FUNCTIONS IN: molecular_function unknown; INVOLVED IN: biological_process unknown; LOCATED IN: endomembrane system; EXPRESSED IN: 20 plant structures; EXPRESSED DURING: 13 growth stages; CONTAINS InterPro DOMAIN/s: FAS1 domain (InterPro:IPR000782); Has 18 Blast hits to 18 proteins in 7 species: Archae - 0; Bacteria - 6; Metazoa - 0; Fungi - 0; Plants - 12; Viruses - 0; Othe…
Bra007197	A09:27902487-27905580	0.150221	0	-Inf	0.217499	0	-Inf	AT4G13810 (E=4e-153) AtRLP47 | AtRLP47 (Receptor Like Protein 47); protein binding
Bra007226	A09:28079337-28081517	0.0916079	0	-Inf	0.168206	0	-Inf	AT3G56200 (E=1e-156) | amino acid transporter family protein
Bra007237	A09:28145000-28146403	0.0693851	0	-Inf	0.17877	0	-Inf	AT3G56330 (E=4e-174) | N2,N2-dimethylguanosine tRNA methyltransferase family protein
Bra007246	A09:28187199-28188765	0.231053	0	-Inf	0.118937	0	-Inf	AT2G40800 (E=8e-148) | FUNCTIONS IN: molecular_function unknown; INVOLVED IN: biological_process unknown; LOCATED IN: mitochondrion; EXPRESSED IN: 19 plant structures; EXPRESSED DURING: 11 growth stages; CONTAINS InterPro DOMAIN/s: Mitochondrial import inner membrane translocase, subunit Tim21 (InterPro:IPR013261); BEST Arabidopsis thaliana protein match is: unknown protein (TAIR:AT3G56430.1); Ha…
Bra007254	A09:28212863-28214552	0.124983	0	-Inf	0.0460153	0	-Inf	AT3G56520 (E=2e-037) | no apical meristem (NAM) family protein
Bra007256	A09:28225634-28228969	0.196754	0	-Inf	0.3525	0	-Inf	AT3G47090 (E=7e-248) | leucine-rich repeat transmembrane protein kinase, putative
Bra007259	A09:28243800-28246085	0.382966	0	-Inf	0.832958	0	-Inf	AT3G56630 (E=2e-226) CYP94D2 | CYP94D2; electron carrier/ heme binding / iron ion binding / monooxygenase/ oxygen binding
Bra007265	A09:28275198-28276571	15.5897	0	-Inf	63.6038	0	-Inf	AT3G56710 (E=2e-042) SIB1 | SIB1 (SIGMA FACTOR BINDING PROTEIN 1); binding / protein binding
Bra007268	A09:28289437-28291033	0.0548738	0	-Inf	0.0352768	0	-Inf	AT3G56750 (E=1e-218) | unknown protein
Bra007270	A09:28298283-28300612	0.0720222	0	-Inf	0.116019	0	-Inf	AT3G56810 (E=3e-109) | unknown protein
Bra007278	A09:28320773-28323531	0.0661686	0	-Inf	0.492948	0	-Inf	AT3G56870 (E=5e-144) | unknown protein
Bra007279	A09:28336619-28337306	11.8996	0	-Inf	14.1014	0	-Inf	AT3G56880 (E=2e-069) | VQ motif-containing protein
Bra007293	A09:28424166-28426226	1.13986	0	-Inf	0.812739	0	-Inf	AT3G57020 (E=6e-178) | strictosidine synthase family protein
Bra007298	A09:28456068-28456401	10.9518	0	-Inf	18.9201	0	-Inf	AT3G57062 (E=3e-022) | unknown protein
Bra007303	A09:28475990-28477250	2.06139	0	-Inf	1.42534	0	-Inf	AT3G57120 (E=7e-071) | protein kinase family protein
Bra007310	A09:28514423-28516122	3.21991	0	-Inf	1.77645	0	-Inf	AT3G57190 (E=2e-172) | peptide chain release factor, putative
Bra007315	A09:28544804-28545895	0.16205	0	-Inf	0.278446	0	-Inf	AT3G57260 (E=1e-128) BGL2, PR2, BG2, PR-2 | BGL2 (BETA-1,3-GLUCANASE 2); cellulase/ glucan 1,3-beta-glucosidase/ hydrolase, hydrolyzing O-glycosyl compounds
Bra007316	A09:28547491-28551516	14.5543	0	-Inf	19.8089	0	-Inf	AT3G57280 (E=2e-098) | unknown protein
Bra007325	A09:28592144-28593488	9.02489	0	-Inf	5.18678	0	-Inf	AT5G52500 (E=5e-109) | unknown protein
Bra007328	A09:28629904-28630186	6.86558	0	-Inf	10.5903	0	-Inf	AT3G57450 (E=5e-031) | unknown protein
Bra007330	A09:28638218-28638910	1.63992	0	-Inf	3.8755	0	-Inf	AT3G57480 (E=3e-080) | zinc finger (C2H2 type, AN1-like) family protein
Bra007337	A09:28677628-28678660	3.33209	0	-Inf	7.00695	0	-Inf	AT3G57560 (E=7e-162) | aspartate/glutamate/uridylate kinase family protein
Bra007341	A09:28700826-28701639	0.167864	0	-Inf	0.0620069	0	-Inf	AT3G57600 (E=2e-092) | AP2 domain-containing transcription factor, putative
Bra007342	A09:28702557-28704421	14.6624	0	-Inf	23.2521	0	-Inf	AT3G57610 (E=3e-261) ADSS | ADSS (ADENYLOSUCCINATE SYNTHASE); adenylosuccinate synthase
Bra007359	A09:28795792-28796197	0.101388	0	-Inf	0.545803	0	-Inf	AT3G12345 (E=6e-022) | unknown protein
Bra007361	A09:28813963-28815533	0.144655	0	-Inf	0.0699096	0	-Inf	AT3G57830 (E=3e-149) | leucine-rich repeat transmembrane protein kinase, putative
Bra007372	A09:28862013-28869417	8.27417	0	-Inf	11.419	0	-Inf	AT3G57990 (E=3e-116) | unknown protein
Bra007373	A09:28876553-28877099	0.672194	0	-Inf	0.314442	0	-Inf	AT3G58000 (E=4e-057) | VQ motif-containing protein
Bra007378	A09:28897245-28898007	0.875024	0	-Inf	0.0686565	0	-Inf	AT3G58070 (E=4e-090) GIS | GIS (GLABROUS INFLORESCENCE STEMS); nucleic acid binding / transcription factor/ zinc ion binding
Bra007388	A09:28963664-28964981	0.0603927	0	-Inf	0.0259725	0	-Inf	AT3G44790 (E=5e-070) | meprin and TRAF homology domain-containing protein / MATH domain-containing protein
Bra007406	A09:29033320-29034496	0.114155	0	-Inf	0.16517	0	-Inf	AT3G57590 (E=6e-111) | FUNCTIONS IN: molecular_function unknown; INVOLVED IN: biological_process unknown; CONTAINS InterPro DOMAIN/s: Cyclin-like F-box (InterPro:IPR001810), F-box associated type 3 (InterPro:IPR013187), F-box associated type 1 (InterPro:IPR017451); BEST Arabidopsis thaliana protein match is: F-box family protein (TAIR:AT3G57580.1); Has 891 Blast hits to 856 proteins in 41 species…
Bra007419	A09:29098485-29101243	0.0558084	0	-Inf	0.108458	0	-Inf	AT3G58780 (E=2e-116) SHP1, AGL1 | SHP1 (SHATTERPROOF 1); DNA binding / protein binding / transcription factor
Bra007421	A09:29108096-29109116	0.34552	0	-Inf	0.823431	0	-Inf	AT3G58800 (E=9e-135) | unknown protein
Bra007440	A09:29221809-29224531	0.0113275	0	-Inf	0.00725076	0	-Inf	None
Bra007446	A09:29248947-29249718	22.0216	0	-Inf	8.38897	0	-Inf	AT3G59400 (E=3e-085) GUN4 | GUN4; enzyme binding / tetrapyrrole binding
Bra007448	A09:29260707-29263416	0.952979	0	-Inf	0.660418	0	-Inf	AT3G59420 (E=0.0) ACR4 | ACR4 (ARABIDOPSIS CRINKLY4); kinase/ transmembrane receptor protein kinase
Bra007456	A09:29302650-29303250	1.557	0	-Inf	1.2495	0	-Inf	AT3G59520 (E=6e-104) ATRBL13 | ATRBL13 (ARABIDOPSIS RHOMBOID-LIKE PROTEIN 13)
Bra007457	A09:29303948-29312295	0.269312	0	-Inf	0.119592	0	-Inf	AT3G59530 (E=4e-204) | strictosidine synthase family protein
Bra007460	A09:29316267-29319379	0.0398598	0	-Inf	0.0510555	0	-Inf	AT2G43490 (E=2e-287) | RAB GTPase activator
Bra007470	A09:29372989-29374649	0.132416	0	-Inf	0.172041	0	-Inf	AT3G59680 (E=4e-072) | unknown protein
Bra007475	A09:29397601-29400023	0.0143656	0	-Inf	0.0184768	0	-Inf	AT2G43790 (E=9e-129) ATMPK6, MPK6, MAPK6 | ATMPK6 (ARABIDOPSIS THALIANA MAP KINASE 6); MAP kinase/ kinase
Bra007481	A09:29414882-29415161	54.7166	0	-Inf	69.5607	0	-Inf	AT3G59840 (E=9e-047) | unknown protein
Bra007485	A09:29423817-29424195	0.638971	0	-Inf	1.91257	0	-Inf	AT3G59880 (E=3e-046) | unknown protein
Bra007491	A09:29470543-29470864	0.512877	0	-Inf	2.15962	0	-Inf	AT3G59900 (E=4e-018) ARGOS | ARGOS (AUXIN-REGULATED GENE INVOLVED IN ORGAN SIZE)
Bra007504	A09:29527521-29528388	3.61481	0	-Inf	3.43061	0	-Inf	AT3G60080 (E=1e-083) | zinc finger (C3HC4-type RING finger) family protein
Bra007505	A09:29530509-29530974	0.275777	0	-Inf	0.182641	0	-Inf	AT3G60090 (E=4e-054) | VQ motif-containing protein
Bra007511	A09:29571826-29572222	1.08961	0	-Inf	1.9127	0	-Inf	AT3G60966 (E=7e-039) | protein binding / zinc ion binding
Bra007514	A09:29580302-29581124	0.778227	0	-Inf	0.304825	0	-Inf	AT3G60200 (E=1e-045) | unknown protein
Bra007515	A09:29582786-29583722	0.0584606	0	-Inf	0.0753984	0	-Inf	AT3G60220 (E=7e-101) ATL4 | ATL4; protein binding / zinc ion binding
Bra007516	A09:29586026-29586482	0.796873	0	-Inf	0.0961297	0	-Inf	AT1G14060 (E=6e-011) | FUNCTIONS IN: molecular_function unknown; INVOLVED IN: N-terminal protein myristoylation; LOCATED IN: cellular_component unknown; EXPRESSED IN: 16 plant structures; EXPRESSED DURING: 10 growth stages; CONTAINS InterPro DOMAIN/s: GCK (InterPro:IPR012891); BEST Arabidopsis thaliana protein match is: unknown protein (TAIR:AT5G02210.1); Has 243 Blast hits to 215 proteins in 60 …
Bra007525	A09:29617771-29618551	6.88541	0	-Inf	16.8253	0	-Inf	AT3G61090 (E=4e-027) | unknown protein
Bra007535	A09:29665761-29667680	0.888284	0	-Inf	1.22561	0	-Inf	AT3G60450 (E=5e-066) | INVOLVED IN: biological_process unknown; LOCATED IN: cellular_component unknown; EXPRESSED IN: 24 plant structures; EXPRESSED DURING: 14 growth stages; CONTAINS InterPro DOMAIN/s: Phosphoglycerate mutase (InterPro:IPR013078), PRIB5 (InterPro:IPR012398); BEST Arabidopsis thaliana protein match is: unknown protein (TAIR:AT3G60440.1); Has 187 Blast hits to 185 proteins in 74 s…
Bra007542	A09:29705003-29705847	1.58249	0	-Inf	0.890684	0	-Inf	AT3G60530 (E=2e-095) | zinc finger (GATA type) family protein
Bra007545	A09:29732899-29733793	0.083276	0	-Inf	0.241832	0	-Inf	AT3G60580 (E=8e-092) | zinc finger (C2H2 type) family protein
Bra007551	A09:29755941-29757345	0.830441	0	-Inf	1.97209	0	-Inf	AT3G60680 (E=5e-159) | unknown protein
Bra007568	A09:29819816-29821167	0.0772414	0	-Inf	0.0996111	0	-Inf	AT3G60880 (E=2e-070) DHDPS, DHDPS1 | dihydrodipicolinate synthase 1 (DHDPS1) (DHDPS) (DHPS1)
Bra007569	A09:29823291-29824563	0.412449	0	-Inf	0.0662583	0	-Inf	AT3G60900 (E=1e-155) FLA10 | FLA10
Bra007580	A09:29882223-29883641	2.23733	0	-Inf	2.75668	0	-Inf	AT3G61180 (E=6e-156) | zinc finger (C3HC4-type RING finger) family protein
Bra007600	A09:29962846-29964706	0.0739796	0	-Inf	0.0475239	0	-Inf	AT3G61390 (E=1e-163) | U-box domain-containing protein
Bra007609	A09:30007414-30009730	0.981844	0	-Inf	0.231862	0	-Inf	AT3G61490 (E=1e-251) | glycoside hydrolase family 28 protein / polygalacturonase (pectinase) family protein
Bra007615	A09:30050346-30051690	9.91416	0	-Inf	6.12843	0	-Inf	AT3G61580 (E=2e-242) | delta-8 sphingolipid desaturase (SLD1)
Bra007621	A09:30082334-30082793	0.783623	0	-Inf	2.45627	0	-Inf	AT2G46310 (E=3e-029) CRF5 | CRF5 (CYTOKININ RESPONSE FACTOR 5); DNA binding / transcription factor
Bra007644	A09:30249205-30250186	0.136951	0	-Inf	0.0294913	0	-Inf	AT2G46810 (E=2e-070) | basic helix-loop-helix (bHLH) family protein
Bra007647	A09:30266271-30266628	15.7267	0	-Inf	29.6979	0	-Inf	AT3G61980 (E=1e-038) | serine protease inhibitor, Kazal-type family protein
Bra007652	A09:30282758-30283534	0.500444	0	-Inf	0.953766	0	-Inf	AT3G62020 (E=6e-117) GLP10 | GLP10 (GERMIN-LIKE PROTEIN 10); manganese ion binding / nutrient reservoir
Bra007656	A09:30289953-30291249	1.39174	0	-Inf	0.821262	0	-Inf	AT3G62040 (E=3e-110) | catalytic/ hydrolase
Bra007658	A09:30295874-30296612	5.91569	0	-Inf	2.71145	0	-Inf	AT3G62070 (E=9e-069) | unknown protein
Bra007668	A09:30330105-30332232	1.9041	0	-Inf	0.673494	0	-Inf	AT3G62200 (E=5e-128) | FUNCTIONS IN: molecular_function unknown; INVOLVED IN: biological_process unknown; LOCATED IN: cellular_component unknown; CONTAINS InterPro DOMAIN/s: Protein of unknown function DUF537 (InterPro:IPR007491); BEST Arabidopsis thaliana protein match is: EDA32 (embryo sac development arrest 32) (TAIR:AT3G62210.1); Has 3380 Blast hits to 2820 proteins in 272 species: Archae - 0…
Bra007669	A09:30334776-30336576	8.59398	0	-Inf	8.70234	0	-Inf	AT3G62260 (E=3e-160) | protein phosphatase 2C, putative / PP2C, putative
Bra007684	A09:30388290-30390233	0.119508	0	-Inf	0.141493	0	-Inf	AT3G62570 (E=1e-225) | DNAJ heat shock N-terminal domain-containing protein
Bra007699	A09:30454473-30457062	0.991554	0	-Inf	0.835122	0	-Inf	AT4G27830 (E=3e-242) BGLU10 | BGLU10 (BETA GLUCOSIDASE 10); catalytic/ cation binding / hydrolase, hydrolyzing O-glycosyl compounds
Bra007703	A09:30463540-30463934	19.4745	0	-Inf	43.7203	0	-Inf	AT3G62810 (E=1e-043) | complex 1 family protein / LVR family protein
Bra007718	A09:30519028-30519337	10.3051	0	-Inf	20.7404	0	-Inf	AT3G62960 (E=9e-054) | glutaredoxin family protein
Bra007728	A09:30589762-30590761	0.124462	0	-Inf	0.29784	0	-Inf	AT3G63110 (E=5e-140) ATIPT3, IPT3 | ATIPT3 (ARABIDOPSIS THALIANA ISOPENTENYLTRANSFERASE 3); ATP binding / tRNA isopentenyltransferase/ transferase, transferring alkyl or aryl (other than methyl) groups
Bra007736	A09:30628493-30629292	2.57401	0	-Inf	1.7678	0	-Inf	AT3G63210 (E=2e-078) MARD1 | MARD1
Bra007739	A09:30665886-30667495	0.398067	0	-Inf	1.11394	0	-Inf	AT3G63350 (E=2e-046) AT-HSFA7B, HSFA7B | AT-HSFA7B; DNA binding / transcription factor
Bra007741	A09:30669334-30670540	18.0393	0	-Inf	47.8678	0	-Inf	AT3G63420 (E=2e-024) AGG1, ATAGG1 | AGG1 (Arabidopsis Ggamma-subunit 1); GTP binding
Bra007742	A09:30672055-30673715	0.236433	0	-Inf	0.417123	0	-Inf	AT3G63430 (E=2e-111) | unknown protein
Bra007755	A09:30725575-30726036	1.52981	0	-Inf	3.18959	0	-Inf	AT3G53690 (E=3e-066) | zinc finger (C3HC4-type RING finger) family protein
Bra007772	A09:30813409-30813976	1.11267	0	-Inf	1.39641	0	-Inf	AT2G26040 (E=3e-086) | Bet v I allergen family protein
Bra007781	A09:30851864-30853244	0.0581201	0	-Inf	0.104501	0	-Inf	AT2G25680 (E=6e-196) MOT1 | MOT1 (molybdate transporter 1); molybdate ion transmembrane transporter/ sulfate transmembrane transporter
Bra007784	A09:30860845-30862244	0.952862	0	-Inf	0.877944	0	-Inf	AT2G25620 (E=2e-186) | protein phosphatase 2C, putative / PP2C, putative
Bra007795	A09:30907796-30908846	4.54929	0	-Inf	5.02443	0	-Inf	AT2G25520 (E=4e-170) | phosphate translocator-related
Bra007798	A09:30924143-30926154	0.115027	0	-Inf	0.172163	0	-Inf	AT2G25460 (E=7e-178) | FUNCTIONS IN: molecular_function unknown; INVOLVED IN: biological_process unknown; LOCATED IN: cellular_component unknown; EXPRESSED IN: male gametophyte, root, carpel, stamen; EXPRESSED DURING: M germinated pollen stage, 4 anthesis; CONTAINS InterPro DOMAIN/s: C2 calcium-dependent membrane targeting (InterPro:IPR000008); BEST Arabidopsis thaliana protein match is: unknown …
Bra007800	A09:30931767-30933609	0.630382	0	-Inf	0.199403	0	-Inf	AT2G25430 (E=7e-185) | epsin N-terminal homology (ENTH) domain-containing protein
Bra007808	A09:30979214-30979700	8.98307	0	-Inf	20.1938	0	-Inf	AT2G25250 (E=6e-021) | unknown protein
Bra007811	A09:31003126-31004179	0.0330777	0	-Inf	0.0212969	0	-Inf	AT2G25200 (E=2e-137) | unknown protein
Bra007812	A09:31006802-31008221	0.0112261	0	-Inf	0.0576585	0	-Inf	AT1G07260 (E=5e-208) UGT71C3 | UGT71C3 (UDP-GLUCOSYL TRANSFERASE 71C3); UDP-glycosyltransferase/ quercetin 3-O-glucosyltransferase/ transferase, transferring glycosyl groups
Bra007815	A09:31022591-31023605	0.0174171	0	-Inf	0.0673153	0	-Inf	None
Bra007823	A09:31076640-31077513	3.3627	0	-Inf	5.14895	0	-Inf	AT2G47120 (E=4e-115) | short-chain dehydrogenase/reductase (SDR) family protein
Bra007828	A09:31116423-31120521	0.126145	0	-Inf	0.250354	0	-Inf	AT2G24850 (E=2e-191) TAT3, TAT | TAT3 (TYROSINE AMINOTRANSFERASE 3); L-tyrosine:2-oxoglutarate aminotransferase/ transaminase
Bra007830	A09:31141010-31142785	2.87621	0	-Inf	3.87199	0	-Inf	AT2G24830 (E=2e-159) | zinc finger (CCCH-type) family protein / D111/G-patch domain-containing protein
Bra007834	A09:31154699-31155152	2.72647	0	-Inf	0.489227	0	-Inf	AT2G24762 (E=3e-041) AtGDU4 | AtGDU4 (Arabidopsis thaliana GLUTAMINE DUMPER 4)
Bra007843	A09:31211633-31212752	4.37342	0	-Inf	3.54916	0	-Inf	AT2G24540 (E=2e-172) AFR | AFR (ATTENUATED FAR-RED RESPONSE)
Bra007850	A09:31245357-31246116	0.174387	0	-Inf	0.227865	0	-Inf	AT2G24440 (E=6e-034) | selenium binding
Bra007867	A02:11416536-11418061	0.128758	0	-Inf	0.213384	0	-Inf	AT1G69580 (E=2e-124) | transcription factor
Bra007869	A02:11434225-11434918	0.185651	0	-Inf	0.120462	0	-Inf	AT1G69600 (E=4e-088) ZFHD1, ATHB29 | ZFHD1 (ZINC FINGER HOMEODOMAIN 1); DNA binding / transcription activator/ transcription factor
Bra007879	A02:11508337-11508865	9.88627	0	-Inf	6.75699	0	-Inf	AT1G69760 (E=3e-048) | unknown protein
Bra007883	A02:11565181-11573744	0.96409	0	-Inf	0.0464423	0	-Inf	AT1G69800 (E=3e-187) | CBS domain-containing protein
Bra007884	A02:11576277-11578396	0.0439859	0	-Inf	0.018861	0	-Inf	AT1G69810 (E=5e-111) WRKY36, ATWRKY36 | WRKY36; transcription factor
Bra007892	A02:11657961-11658740	0.841929	0	-Inf	2.6132	0	-Inf	AT1G70000 (E=2e-069) | DNA-binding family protein
Bra007901	A02:11722374-11724231	0.241864	0	-Inf	0.0222549	0	-Inf	AT1G70210 (E=3e-146) CYCD1;1 | CYCD1;1 (CYCLIN D1;1); cyclin-dependent protein kinase regulator
Bra007903	A02:11734194-11735537	6.45591	0	-Inf	10.0291	0	-Inf	AT1G24050 (E=4e-035) | unknown protein
Bra007913	A02:11811530-11812301	0.858998	0	-Inf	0.808576	0	-Inf	AT1G70420 (E=2e-080) | unknown protein
Bra007916	A02:11827416-11827884	0.0678512	0	-Inf	0.269463	0	-Inf	AT1G70470 (E=7e-040) | unknown protein
Bra007920	A02:11856852-11862094	0.0181589	0	-Inf	0.0468068	0	-Inf	AT1G70510 (E=5e-127) KNAT2, ATK1 | KNAT2 (KNOTTED-LIKE FROM ARABIDOPSIS THALIANA 2); transcription factor
Bra007929	A02:11933363-11933804	38.137	0	-Inf	101.876	0	-Inf	AT1G70600 (E=5e-081) | structural constituent of ribosome
Bra007939	A02:11983244-11983850	0.156757	0	-Inf	0.10217	0	-Inf	AT1G70720 (E=5e-063) | invertase/pectin methylesterase inhibitor family protein
Bra007952	A02:12065925-12067829	0.0755993	0	-Inf	0.147709	0	-Inf	AT1G70920 (E=3e-067) ATHB18 | ATHB18 (Arabidopsis thaliana homeobox-leucine zipper protein 18); DNA binding / transcription factor
Bra007959	A02:12133068-12134589	1.36009	0	-Inf	2.47283	0	-Inf	AT1G71060 (E=1e-245) | pentatricopeptide (PPR) repeat-containing protein
Bra007961	A02:12140067-12140847	6.31383	0	-Inf	5.98682	0	-Inf	AT1G71100 (E=5e-118) RSW10 | RSW10 (RADIAL SWELLING 10); ribose-5-phosphate isomerase
Bra007963	A02:12145524-12146028	22.6828	0	-Inf	26.3288	0	-Inf	AT1G71130 (E=4e-046) | AP2 domain-containing transcription factor, putative
Bra007973	A02:12208478-12211341	0.00769894	0	-Inf	0.00986696	0	-Inf	AT1G71530 (E=4e-216) | protein kinase family protein
Bra007974	A02:12212930-12213377	0.152621	0	-Inf	0.202927	0	-Inf	AT1G71520 (E=3e-056) | AP2 domain-containing transcription factor, putative
Bra007978	A02:12241158-12243588	2.49229	0	-Inf	0.77684	0	-Inf	AT1G71400 (E=1e-235) AtRLP12 | AtRLP12 (Receptor Like Protein 12); protein binding
Bra007998	A02:12426945-12427767	107.35	0	-Inf	181.311	0	-Inf	AT1G71950 (E=1e-045) | identical protein binding / serine-type endopeptidase
Bra008000	A02:12449698-12450334	1.47151	0	-Inf	1.68125	0	-Inf	AT1G71970 (E=2e-065) | unknown protein
Bra008005	A02:12473638-12473967	5.16801	0	-Inf	1.85953	0	-Inf	AT1G72060 (E=5e-037) | serine-type endopeptidase inhibitor
Bra008011	A02:12516756-12522115	0.00872092	0	-Inf	0.00557841	0	-Inf	AT1G72140 (E=2e-259) | proton-dependent oligopeptide transport (POT) family protein
Bra008016	A02:12560615-12561827	0.0274369	0	-Inf	0.0705535	0	-Inf	AT1G72200 (E=7e-169) | zinc finger (C3HC4-type RING finger) family protein
Bra008017	A02:12568527-12570679	0.164129	0	-Inf	0.047009	0	-Inf	AT1G72210 (E=2e-121) | basic helix-loop-helix (bHLH) family protein (bHLH096)
Bra008018	A02:12580394-12581477	0.238819	0	-Inf	0.901771	0	-Inf	AT1G72220 (E=2e-118) | zinc finger (C3HC4-type RING finger) family protein
Bra008019	A02:12588032-12589180	2.5051	0	-Inf	0.257501	0	-Inf	AT1G72230 (E=3e-059) | plastocyanin-like domain-containing protein
Bra008025	A02:12618252-12618885	0.506733	0	-Inf	1.36606	0	-Inf	AT1G72290 (E=1e-053) | trypsin and protease inhibitor family protein / Kunitz family protein
Bra008027	A02:12632667-12636802	0.0300098	0	-Inf	1.16312	0	-Inf	AT1G72300 (E=0.0) | leucine-rich repeat transmembrane protein kinase, putative
Bra008028	A02:12648526-12649459	1.68356	0	-Inf	0.530238	0	-Inf	AT1G72310 (E=9e-104) ATL3 | ATL3; protein binding / zinc ion binding
Bra008032	A02:12667661-12668015	9.70002	0	-Inf	4.75354	0	-Inf	AT1G72430 (E=5e-049) | auxin-responsive protein-related
Bra008034	A02:12686766-12688800	0.138643	0	-Inf	0.188183	0	-Inf	AT1G72460 (E=2e-225) | leucine-rich repeat transmembrane protein kinase, putative
Bra008058	A02:12942281-12944488	0.0231977	0	-Inf	0.0599574	0	-Inf	None
Bra008067	A02:12986366-12987742	14.6978	0	-Inf	17.8572	0	-Inf	AT1G73030 (E=2e-053) VPS46.2 | VPS46.2
Bra008074	A02:13007022-13008449	0.597316	0	-Inf	1.57298	0	-Inf	AT1G73150 (E=5e-049) GTE3 | GTE3 (GLOBAL TRANSCRIPTION FACTOR GROUP E 3); DNA binding / histone binding
Bra008080	A02:13023515-13026400	1.52274	0	-Inf	1.21072	0	-Inf	AT1G73200 (E=3e-252) | phosphoinositide binding
Bra008081	A02:13027894-13029912	1.35077	0	-Inf	0.656485	0	-Inf	AT1G73210 (E=5e-137) | unknown protein
Bra008083	A02:13048468-13049116	0.24305	0	-Inf	0.451515	0	-Inf	AT1G73260 (E=1e-033) | trypsin and protease inhibitor family protein / Kunitz family protein
Bra008095	A02:13105757-13107129	1.14184	0	-Inf	1.48331	0	-Inf	AT1G73380 (E=9e-178) | unknown protein
Bra008099	A02:13123884-13124805	12.2846	0	-Inf	25.7269	0	-Inf	AT1G73500 (E=2e-131) ATMKK9, MKK9 | MKK9 (MAP KINASE KINASE 9); MAP kinase kinase/ kinase/ protein kinase activator
Bra008105	A02:13146482-13149339	0.0488393	0	-Inf	0.0313036	0	-Inf	AT1G73590 (E=0.0) PIN1, ATPIN1 | PIN1 (PIN-FORMED 1); transporter
Bra008109	A02:13182171-13183347	0.356735	0	-Inf	0.110113	0	-Inf	AT4G36840 (E=2e-040) | FUNCTIONS IN: molecular_function unknown; INVOLVED IN: biological_process unknown; LOCATED IN: cellular_component unknown; CONTAINS InterPro DOMAIN/s: Galactose oxidase/kelch, beta-propeller (InterPro:IPR011043), Kelch repeat type 1 (InterPro:IPR006652), Kelch related (InterPro:IPR013089), Kelch-type beta propeller (InterPro:IPR015915); BEST Arabidopsis thaliana protein mat…
Bra008131	A02:13319755-13321685	0.564263	0	-Inf	0.363511	0	-Inf	AT1G74080 (E=5e-117) ATMYB122, MYB122 | MYB122 (MYB DOMAIN PROTEIN 122); DNA binding / transcription factor
Bra008138	A02:13370475-13379611	0.0671138	0	-Inf	0.0183793	0	-Inf	AT1G74190 (E=0.0) AtRLP15 | AtRLP15 (Receptor Like Protein 15); protein binding
Bra008146	A02:13408998-13409785	0.814943	0	-Inf	0.889163	0	-Inf	AT1G74380 (E=3e-109) XXT5 | XXT5 (XYLOGLUCAN XYLOSYLTRANSFERASE 5); transferase/ transferase, transferring glycosyl groups / xyloglucan 6-xylosyltransferase
Bra008150	A02:13437828-13438125	0.388686	0	-Inf	2.76448	0	-Inf	AT3G20820 (E=8e-053) | leucine-rich repeat family protein
Bra008158	A02:13478416-13480351	0.3168	0	-Inf	0.217863	0	-Inf	AT1G74630 (E=2e-308) | pentatricopeptide (PPR) repeat-containing protein
Bra008160	A02:13502877-13504349	0.570108	0	-Inf	0.0222549	0	-Inf	AT1G74650 (E=6e-118) ATY13, ATMYB31, MYB31 | MYB31 (MYB DOMAIN PROTEIN 31); DNA binding / transcription factor
Bra008177	A02:13585571-13611587	0.179453	0	-Inf	0.140104	0	-Inf	AT1G75080 (E=5e-017) BZR1 | BZR1 (BRASSINAZOLE-RESISTANT 1); DNA binding / transcription regulator/ transcription repressor
Bra008186	A02:13660306-13661565	0.43742	0	-Inf	13.7298	0	-Inf	AT1G75250 (E=2e-042) ATRL6 | ATRL6 (ARABIDOPSIS RAD-LIKE 6); transcription factor
Bra008187	A02:13664675-13666096	2.92913	0	-Inf	6.17927	0	-Inf	AT1G75280 (E=3e-126) | isoflavone reductase, putative
Bra008188	A02:13666378-13667238	0.630117	0	-Inf	1.41141	0	-Inf	AT1G75270 (E=5e-099) DHAR2 | DHAR2 (DEHYDROASCORBATE REDUCTASE 2); glutathione binding / glutathione dehydrogenase (ascorbate)
Bra008192	A02:13696861-13697359	6.14828	0	-Inf	16.6607	0	-Inf	AT1G75390 (E=8e-034) AtbZIP44 | AtbZIP44 (Arabidopsis thaliana basic leucine-zipper 44); DNA binding / protein heterodimerization/ transcription factor
Bra008199	A02:13731710-13733108	0.468914	0	-Inf	0.631538	0	-Inf	AT1G47620 (E=2e-211) CYP96A8 | CYP96A8; electron carrier/ heme binding / iron ion binding / monooxygenase/ oxygen binding
Bra008200	A02:13736167-13736764	0.685109	0	-Inf	0.210261	0	-Inf	AT1G75490 (E=8e-088) | DNA binding / transcription factor
Bra008232	A02:13981441-13982863	0.0447866	0	-Inf	0.0862592	0	-Inf	AT5G16370 (E=1e-224) AAE5 | AAE5 (ACYL ACTIVATING ENZYME 5); catalytic
Bra008236	A02:13990827-13991298	0.868295	0	-Inf	4.41847	0	-Inf	AT1G76060 (E=2e-072) EMB1793 | EMB1793 (EMBRYO DEFECTIVE 1793); catalytic
Bra008237	A02:13998502-13999288	0.0757775	0	-Inf	0.294112	0	-Inf	AT1G76070 (E=4e-048) | unknown protein
Bra008243	A02:14035308-14035779	2.69391	0	-Inf	1.3721	0	-Inf	AT1G20460 (E=2e-025) | unknown protein
Bra008246	A02:14056028-14057620	6.58434	0	-Inf	8.65092	0	-Inf	AT4G20095 (E=7e-048) | unknown protein
Bra008267	A02:14223288-14223927	3.915	0	-Inf	4.44519	0	-Inf	AT1G76600 (E=2e-075) | unknown protein
Bra008272	A02:14261185-14262459	0.580961	0	-Inf	0.261433	0	-Inf	AT4G30620 (E=2e-027) | unknown protein
Bra008274	A02:14264672-14265486	0.028463	0	-Inf	0.110664	0	-Inf	AT1G76770 (E=8e-054) | heat shock protein-related
Bra008276	A02:14276010-14287625	0.00480708	0	-Inf	0.00767429	0	-Inf	AT1G76780 (E=2e-064) | FUNCTIONS IN: molecular_function unknown; INVOLVED IN: biological_process unknown; LOCATED IN: cellular_component unknown; EXPRESSED IN: hypocotyl, flower, root; EXPRESSED DURING: petal differentiation and expansion stage; CONTAINS InterPro DOMAIN/s: Heat shock protein Hsp20 (InterPro:IPR002068), HSP20-like chaperone (InterPro:IPR008978); BEST Arabidopsis thaliana protein m…
Bra008278	A02:14296330-14297357	0.189782	0	-Inf	0.0821262	0	-Inf	AT3G11450 (E=3e-033) | DNAJ heat shock N-terminal domain-containing protein / cell division protein-related
Bra008302	A02:14594934-14596148	0.0222301	0	-Inf	0.0861398	0	-Inf	AT1G77330 (E=5e-102) | 1-aminocyclopropane-1-carboxylate oxidase, putative / ACC oxidase, putative
Bra008305	A02:14607101-14607770	0.0328489	0	-Inf	0.213365	0	-Inf	AT1G77400 (E=1e-018) | FUNCTIONS IN: molecular_function unknown; INVOLVED IN: biological_process unknown; LOCATED IN: cellular_component unknown; EXPRESSED IN: 8 plant structures; EXPRESSED DURING: petal differentiation and expansion stage, D bilateral stage, E expanded cotyledon stage; BEST Arabidopsis thaliana protein match is: hydroxyproline-rich glycoprotein family protein (TAIR:AT1G21695.1);…
Bra008309	A02:14616139-14617083	3.1508	0	-Inf	5.91777	0	-Inf	AT1G77450 (E=2e-121) anac032 | anac032 (Arabidopsis NAC domain containing protein 32); transcription factor
Bra008321	A02:14689998-14691545	1.06989	0	-Inf	0.730055	0	-Inf	AT1G77660 (E=6e-141) | MORN (Membrane Occupation and Recognition Nexus) repeat-containing protein /phosphatidylinositol-4-phosphate 5-kinase-related
Bra008338	A02:14811840-14812077	10.0631	0	-Inf	24.1211	0	-Inf	AT1G77885 (E=7e-020) | unknown protein
Bra008341	A02:14843307-14843877	20.169	0	-Inf	23.9721	0	-Inf	AT1G78020 (E=1e-059) | senescence-associated protein-related
Bra008346	A02:14943704-14944655	0.51439	0	-Inf	0.393049	0	-Inf	AT1G78110 (E=4e-083) | unknown protein
Bra008351	A02:14966096-14966801	0.366165	0	-Inf	0.106156	0	-Inf	AT1G78170 (E=3e-065) | unknown protein
Bra008354	A02:14990456-14992777	2.89234	0	-Inf	2.5953	0	-Inf	AT1G78270 (E=1e-211) AtUGT85A4 | AtUGT85A4 (UDP-glucosyl transferase 85A4); UDP-glycosyltransferase/ glucuronosyltransferase/ transferase, transferring hexosyl groups
Bra008356	A02:14997945-14998815	2.46985	0	-Inf	6.35038	0	-Inf	AT1G78310 (E=1e-050) | VQ motif-containing protein
Bra008357	A02:15004762-15005107	23.0918	0	-Inf	46.4043	0	-Inf	AT1G78380 (E=3e-040) ATGSTU19, GST8 | ATGSTU19 (GLUTATHIONE S-TRANSFERASE TAU 19); glutathione binding / glutathione transferase
Bra008358	A02:15013460-15015224	0.00861697	0	-Inf	0.0110489	0	-Inf	AT1G78390 (E=3e-276) NCED9, ATNCED9 | NCED9 (NINE-CIS-EPOXYCAROTENOID DIOXYGENASE 9); 9-cis-epoxycarotenoid dioxygenase
Bra008359	A02:15034462-15034777	6.20928	0	-Inf	16.2957	0	-Inf	AT1G78410 (E=3e-038) | VQ motif-containing protein
Bra008362	A02:15047788-15049530	0.0374339	0	-Inf	0.0241298	0	-Inf	AT1G78440 (E=2e-143) ATGA2OX1 | ATGA2OX1 (gibberellin 2-oxidase 1); gibberellin 2-beta-dioxygenase
Bra008371	A02:15145456-15146731	5.29749	0	-Inf	2.02141	0	-Inf	AT1G78600 (E=2e-121) LZF1, STH3 | LZF1 (LIGHT-REGULATED ZINC FINGER PROTEIN 1); transcription factor/ zinc ion binding
Bra008373	A02:15150156-15151082	27.9792	0	-Inf	18.8866	0	-Inf	AT1G78630 (E=3e-122) emb1473 | emb1473 (embryo defective 1473); structural constituent of ribosome
Bra008381	A02:15197230-15198161	0.326308	0	-Inf	0.140867	0	-Inf	AT3G25490 (E=7e-035) | wall-associated kinase, putative
Bra008407	A02:15403400-15405176	0.114274	0	-Inf	0.293693	0	-Inf	AT1G79330 (E=3e-116) AMC6, ATMCP2B, ATMC5 | ATMC5 (ARABIDOPSIS THALIANA METACASPASE 5); cysteine-type endopeptidase
Bra008417	A02:15508876-15511346	0.949124	0	-Inf	0.449856	0	-Inf	AT1G79540 (E=0.0) | pentatricopeptide (PPR) repeat-containing protein
Bra008433	A02:15599131-15601159	1.50706	0	-Inf	1.04989	0	-Inf	AT1G80870 (E=9e-282) | protein kinase family protein
Bra008445	A02:15673468-15674122	0.375815	0	-Inf	0.177658	0	-Inf	AT1G80730 (E=4e-085) ZFP1, ATZFP1 | ZFP1 (ZINC-FINGER PROTEIN 1); nucleic acid binding / transcription factor/ zinc ion binding
Bra008469	A02:15822212-15823661	0.382835	0	-Inf	0.182554	0	-Inf	AT1G80510 (E=4e-204) | amino acid transporter family protein
Bra008473	A02:15857715-15858210	3.02782	0	-Inf	7.35451	0	-Inf	AT1G80450 (E=5e-067) | VQ motif-containing protein
Bra008477	A02:15877395-15879544	0.140253	0	-Inf	0.015011	0	-Inf	AT1G80370 (E=2e-175) CYCA2;4 | CYCA2;4 (Cyclin A2;4); cyclin-dependent protein kinase regulator
Bra008480	A02:15899132-15900727	0.0962462	0	-Inf	0.0413007	0	-Inf	AT1G80340 (E=7e-186) GA4H, ATGA3OX2, GA3OX2 | GA3OX2 (GIBBERELLIN 3-OXIDASE 2); gibberellin 3-beta-dioxygenase
Bra008483	A02:15906531-15907557	1.67944	0	-Inf	2.56063	0	-Inf	AT1G80290 (E=5e-147) | glycosyltransferase family protein 47
Bra008489	A02:15948517-15948895	33.7377	0	-Inf	11.9272	0	-Inf	AT1G80180 (E=8e-028) | unknown protein
Bra008498	A02:15988692-15989918	2.35643	0	-Inf	3.62732	0	-Inf	AT1G80040 (E=1e-078) | unknown protein
Bra008504	A02:16013636-16014391	0.499587	0	-Inf	0.0730017	0	-Inf	None
Bra008516	A02:16116465-16118280	0.0730083	0	-Inf	0.120477	0	-Inf	AT4G00300 (E=2e-208) | fringe-related protein
Bra008518	A02:16137652-16138033	0.124248	0	-Inf	0.337637	0	-Inf	AT4G00305 (E=2e-052) | zinc finger (C3HC4-type RING finger) family protein
Bra008528	A02:16212470-16215648	0.321144	0	-Inf	0.072516	0	-Inf	AT4G00700 (E=0.0) | C2 domain-containing protein
Bra008544	A02:16337024-16339625	0.181744	0	-Inf	0.748697	0	-Inf	AT4G00890 (E=2e-013) | proline-rich family protein
Bra008547	A02:16412483-16413274	3.21863	0	-Inf	0.0692887	0	-Inf	None
Bra008561	A10:12809615-12813187	0.0112558	0	-Inf	0.115623	0	-Inf	AT5G17330 (E=3e-266) GAD, GAD1 | GAD; calmodulin binding / glutamate decarboxylase
Bra008562	A10:12827421-12831967	0.0135183	0	-Inf	0.0606072	0	-Inf	AT1G34650 (E=3e-233) HDG10 | HDG10 (HOMEODOMAIN GLABROUS 10); DNA binding / transcription factor
Bra008565	A10:12840991-12841381	16.6214	0	-Inf	5.73007	0	-Inf	AT5G17280 (E=4e-028) | unknown protein
Bra008571	A10:12874643-12875979	0.605046	0	-Inf	1.01869	0	-Inf	AT5G17210 (E=2e-072) | unknown protein
Bra008579	A10:12900405-12902012	0.128169	0	-Inf	0.557983	0	-Inf	AT5G17060 (E=1e-107) ATARFB1B | ATARFB1B; GTP binding
Bra008593	A10:12960519-12962744	0.0327304	0	-Inf	0.0700325	0	-Inf	AT5G16820 (E=1e-150) HSF3, HSFA1B, ATHSFA1B | HSF3 (HEAT SHOCK FACTOR 3); DNA binding / transcription factor
Bra008597	A10:12983978-12985271	2.93398	0	-Inf	2.43957	0	-Inf	AT5G16760 (E=6e-158) | inositol 1,3,4-trisphosphate 5/6-kinase
Bra008600	A10:12999279-13002091	3.44242	0	-Inf	2.62495	0	-Inf	AT5G16730 (E=7e-233) | LOCATED IN: chloroplast; EXPRESSED IN: 23 plant structures; EXPRESSED DURING: 13 growth stages; CONTAINS InterPro DOMAIN/s: Spectrin/alpha-actinin (InterPro:IPR018159); BEST Arabidopsis thaliana protein match is: unknown protein (TAIR:AT3G02930.1); Has 241703 Blast hits to 112530 proteins in 2711 species: Archae - 2642; Bacteria - 41887; Metazoa - 104467; Fungi - 18239; Pla…
Bra008604	A10:13024387-13029384	0.0219475	0	-Inf	0.0281222	0	-Inf	AT5G16690 (E=1e-174) ORC3, ATORC3 | ORC3 (ORIGIN RECOGNITION COMPLEX SUBUNIT 3); protein binding
Bra008605	A10:13031389-13036439	1.66238	0	-Inf	1.00748	0	-Inf	AT5G16680 (E=0.0) | PHD finger family protein
Bra008611	A10:13065700-13067704	0.609328	0	-Inf	0.0624875	0	-Inf	AT5G16590 (E=1e-250) LRR1 | LRR1; ATP binding / kinase/ protein serine/threonine kinase
Bra008624	A10:13128863-13130219	1.40222	0	-Inf	2.19797	0	-Inf	AT5G16320 (E=1e-107) FRL1 | FRL1 (FRIGIDA LIKE 1)
Bra008630	A10:13160928-13161480	0.375654	0	-Inf	0.0614685	0	-Inf	AT5G16250 (E=2e-091) | unknown protein
Bra008636	A10:13180590-13181076	7.80597	0	-Inf	10.8736	0	-Inf	AT5G16200 (E=1e-067) | 50S ribosomal protein-related
Bra008651	A10:13240785-13241784	0.0355606	0	-Inf	0.114554	0	-Inf	AT5G16080 (E=4e-169) AtCXE17 | AtCXE17 (Arabidopsis thaliana carboxyesterase 17); hydrolase
Bra008660	A10:13281498-13283451	2.45364	0	-Inf	3.3502	0	-Inf	AT5G15980 (E=2e-258) | pentatricopeptide (PPR) repeat-containing protein
Bra008664	A10:13296256-13299447	2.25127	0	-Inf	2.58862	0	-Inf	AT5G15890 (E=8e-195) | unknown protein
Bra008668	A10:13308677-13309910	17.0984	0	-Inf	4.28737	0	-Inf	AT5G15850 (E=7e-106) COL1, ATCOL1 | COL1 (constans-like 1); transcription factor/ zinc ion binding
Bra008671	A10:13326370-13327234	0.306429	0	-Inf	0.310924	0	-Inf	AT5G15820 (E=6e-028) | zinc finger (C3HC4-type RING finger) family protein
Bra008674	A10:13337170-13339256	0.0800455	0	-Inf	0.0690923	0	-Inf	AT5G15800 (E=1e-125) SEP1, AGL2 | SEP1 (SEPALLATA1); DNA binding / transcription factor
Bra008677	A10:13343596-13347030	12.8518	0	-Inf	31.1248	0	-Inf	AT5G15770 (E=2e-069) AtGNA1 | AtGNA1 (Arabidopsis thaliana glucose-6-phosphate acetyltransferase 1); N-acetyltransferase/ glucosamine 6-phosphate N-acetyltransferase
Bra008686	A10:13385018-13385867	0.157251	0	-Inf	0.768314	0	-Inf	AT1G45063 (E=7e-090) | copper ion binding / electron carrier
Bra008689	A10:13399887-13403271	0.415228	0	-Inf	0.204389	0	-Inf	AT5G15580 (E=0.0) LNG1 | LNG1 (LONGIFOLIA1)
Bra008706	A10:13489268-13490882	0.201298	0	-Inf	0.332028	0	-Inf	AT5G15300 (E=6e-280) | pentatricopeptide (PPR) repeat-containing protein
Bra008712	A10:13513613-13514405	18.9971	0	-Inf	19.5685	0	-Inf	AT5G15210 (E=3e-084) ATHB30, ZFHD3 | ATHB30 (ARABIDOPSIS THALIANA HOMEOBOX PROTEIN 30); DNA binding / transcription factor
Bra008713	A10:13515197-13516088	66.5607	0	-Inf	88.1091	0	-Inf	AT5G15200 (E=5e-098) | 40S ribosomal protein S9 (RPS9B)
Bra008719	A10:13554461-13556889	0.0278793	0	-Inf	0.0476809	0	-Inf	AT5G15130 (E=6e-198) WRKY72, ATWRKY72 | WRKY72; transcription factor
Bra008725	A10:13579714-13580923	0.630007	0	-Inf	0.47201	0	-Inf	AT2G42460 (E=1e-063) | meprin and TRAF homology domain-containing protein / MATH domain-containing protein
Bra008732	A10:13617161-13619497	0.0919889	0	-Inf	0.0590666	0	-Inf	AT5G14890 (E=3e-194) | NHL repeat-containing protein
Bra008734	A10:13625061-13626889	0.535908	0	-Inf	0.921828	0	-Inf	AT5G14860 (E=2e-235) | transferase, transferring glycosyl groups
Bra008739	A10:13640801-13643750	1.16393	0	-Inf	0.8908	0	-Inf	AT5G14760 (E=0.0) AO | AO (L-ASPARTATE OXIDASE); L-aspartate oxidase/ electron carrier/ oxidoreductase
Bra008741	A10:13651781-13652531	0.244731	0	-Inf	0.422602	0	-Inf	AT5G14730 (E=4e-041) | unknown protein
Bra008743	A10:13667714-13670334	0.463782	0	-Inf	0.0596861	0	-Inf	AT5G14700 (E=2e-173) | cinnamoyl-CoA reductase-related
Bra008751	A10:13697182-13701795	0.425013	0	-Inf	0.71073	0	-Inf	AT5G14580 (E=0.0) | polyribonucleotide nucleotidyltransferase, putative
Bra008753	A10:13717406-13718970	0.708688	0	-Inf	0.576697	0	-Inf	AT5G14480 (E=1e-220) | glycosyl transferase family 17 protein
Bra008760	A10:13736064-13738939	0.0373135	0	-Inf	0.0159808	0	-Inf	AT5G14400 (E=2e-128) CYP724A1 | CYP724A1; electron carrier/ heme binding / iron ion binding / monooxygenase/ oxygen binding
Bra008767	A10:13765272-13767179	1.25257	0	-Inf	1.41813	0	-Inf	AT5G14310 (E=2e-221) AtCXE16 | AtCXE16 (Arabidopsis thaliana carboxyesterase 16); hydrolase
Bra008788	A10:13838330-13839199	1.04848	0	-Inf	0.60732	0	-Inf	AT5G14000 (E=5e-077) anac084 | anac084 (Arabidopsis NAC domain containing protein 84); transcription factor
Bra008789	A10:13840506-13842558	0.620642	0	-Inf	0.647265	0	-Inf	AT5G13990 (E=8e-293) ATEXO70C2 | ATEXO70C2 (exocyst subunit EXO70 family protein C2); protein binding
Bra008792	A10:13851219-13852482	0.0281618	0	-Inf	0.0724316	0	-Inf	AT5G13930 (E=4e-219) CHS, TT4, ATCHS | TT4 (TRANSPARENT TESTA 4); naringenin-chalcone synthase
Bra008823	A10:13991409-13993745	0.261475	0	-Inf	0.252008	0	-Inf	AT5G13520 (E=0.0) | peptidase M1 family protein
Bra008830	A10:14022089-14023233	5.80988	0	-Inf	13.3039	0	-Inf	AT5G13440 (E=2e-138) | ubiquinol-cytochrome C reductase iron-sulfur subunit, mitochondrial, putative / Rieske iron-sulfur protein, putative
Bra008831	A10:14024168-14030948	8.44563	0	-Inf	9.72991	0	-Inf	AT5G13420 (E=6e-201) | transaldolase, putative
Bra008833	A10:14031983-14034452	0.0594773	0	-Inf	0.0544705	0	-Inf	AT5G13360 (E=4e-284) | auxin-responsive GH3 family protein
Bra008835	A10:14040244-14042345	0.27332	0	-Inf	0.0444145	0	-Inf	AT5G13330 (E=7e-051) Rap2.6L | Rap2.6L (related to AP2 6L); DNA binding / transcription factor
Bra008839	A10:14057864-14059134	1.26728	0	-Inf	1.01404	0	-Inf	AT5G13290 (E=3e-172) SOL2, CRN | CRN (CORYNE); ATP binding / kinase/ protein kinase
Bra008847	A10:14096526-14098527	0.133751	0	-Inf	0.39991	0	-Inf	AT5G13210 (E=3e-275) | CONTAINS InterPro DOMAIN/s: Uncharacterized conserved protein UCP015417, vWA (InterPro:IPR011205), von Willebrand factor, type A (InterPro:IPR002035); BEST Arabidopsis thaliana protein match is: unknown protein (TAIR:AT3G24780.1); Has 250 Blast hits to 233 proteins in 28 species: Archae - 0; Bacteria - 8; Metazoa - 0; Fungi - 23; Plants - 45; Viruses - 15; Other Eukaryotes …
Bra008850	A10:14135591-14136482	1.09515	0	-Inf	0.855304	0	-Inf	AT5G13170 (E=4e-086) SAG29 | SAG29 (SENESCENCE-ASSOCIATED PROTEIN 29)
Bra008853	A10:14144447-14145557	0.666214	0	-Inf	0.078569	0	-Inf	AT5G13140 (E=9e-052) | FUNCTIONS IN: molecular_function unknown; INVOLVED IN: biological_process unknown; EXPRESSED IN: 22 plant structures; EXPRESSED DURING: 13 growth stages; CONTAINS InterPro DOMAIN/s: Pollen Ole e 1 allergen and extensin (InterPro:IPR006041); BEST Arabidopsis thaliana protein match is: unknown protein (TAIR:AT3G26960.1); Has 90 Blast hits to 85 proteins in 14 species: Archae …
Bra008856	A10:14156242-14157479	1.12374	0	-Inf	1.38393	0	-Inf	AT5G13100 (E=1e-139) | unknown protein
Bra008857	A10:14159549-14160308	8.24468	0	-Inf	15.5458	0	-Inf	AT5G13090 (E=2e-040) | unknown protein
Bra008872	A10:14228163-14230347	0.966753	0	-Inf	0.358081	0	-Inf	AT5G12900 (E=1e-187) | unknown protein
Bra008877	A10:14243400-14245344	0.461104	0	-Inf	0.265926	0	-Inf	AT5G12850 (E=1e-196) | zinc finger (CCCH-type) family protein
Bra008898	A10:14342656-14343910	0.0200363	0	-Inf	0.0775473	0	-Inf	AT5G12330 (E=3e-127) LRP1 | LRP1 (LATERAL ROOT PRIMORDIUM 1); protein homodimerization
Bra008910	A10:14375200-14377222	0.00992015	0	-Inf	0.0127288	0	-Inf	AT5G12180 (E=3e-279) CPK17 | CPK17; ATP binding / calcium ion binding / calmodulin-dependent protein kinase/ kinase/ protein kinase/ protein serine/threonine kinase
Bra008916	A10:14392751-14395205	0.341187	0	-Inf	0.444373	0	-Inf	AT5G12100 (E=0.0) | pentatricopeptide (PPR) repeat-containing protein
Bra008918	A10:14403226-14404249	0.361332	0	-Inf	1.64016	0	-Inf	AT5G12050 (E=2e-055) | unknown protein
Bra008921	A10:14415864-14418591	0.0985331	0	-Inf	0.0180336	0	-Inf	AT5G12000 (E=2e-297) | kinase
Bra008925	A10:14445568-14445991	0.266766	0	-Inf	0.71387	0	-Inf	AT5G11930 (E=6e-046) | glutaredoxin family protein
Bra008929	A10:14465668-14466722	0.191103	0	-Inf	0.0548231	0	-Inf	AT5G11890 (E=3e-109) | FUNCTIONS IN: molecular_function unknown; LOCATED IN: plasma membrane; EXPRESSED IN: 12 plant structures; EXPRESSED DURING: 6 growth stages; CONTAINS InterPro DOMAIN/s: Harpin-induced 1 (InterPro:IPR010847); BEST Arabidopsis thaliana protein match is: unknown protein (TAIR:AT1G17620.1); Has 455 Blast hits to 454 proteins in 19 species: Archae - 0; Bacteria - 0; Metazoa - 0;…
Bra008940	A10:14497346-14497541	22.799	0	-Inf	75.1923	0	-Inf	AT5G11740 (E=5e-018) AGP15, ATAGP15 | AGP15 (ARABINOGALACTAN PROTEIN 15)
Bra008950	A10:14550805-14551847	0.0230722	0	-Inf	0.0298145	0	-Inf	AT5G11620 (E=4e-087) | SWIM zinc finger family protein / mitogen-activated protein kinase kinase kinase (MAPKKK)-related
Bra008954	A10:14585764-14586679	2.11375	0	-Inf	4.72699	0	-Inf	AT5G11550 (E=2e-090) | binding
Bra008956	A10:14609046-14616479	0.031016	0	-Inf	0.0198482	0	-Inf	AT5G11510 (E=3e-292) MYB3R-4, AtMYB3R4 | MYB3R-4 (myb domain protein 3R-4); DNA binding / transcription coactivator/ transcription factor
Bra008971	A10:14679326-14681366	0.066871	0	-Inf	0.0343851	0	-Inf	AT5G11320 (E=2e-207) YUC4 | YUC4 (YUCCA4); monooxygenase/ oxidoreductase
Bra008972	A10:14686604-14688467	0.431614	0	-Inf	1.12847	0	-Inf	AT5G11310 (E=3e-247) | pentatricopeptide (PPR) repeat-containing protein
Bra008973	A10:14690737-14693264	0.111291	0	-Inf	0.0794377	0	-Inf	AT5G11300 (E=5e-203) CYC3B, CYC2BAT, CYCA2;2 | CYC3B (MITOTIC-LIKE CYCLIN 3B FROM ARABIDOPSIS); cyclin-dependent protein kinase regulator
Bra008975	A10:14695248-14696568	1.84389	0	-Inf	3.39575	0	-Inf	AT5G11270 (E=1e-072) OCP3 | OCP3 (OVEREXPRESSOR OF CATIONIC PEROXIDASE 3); transcription factor
Bra008989	A10:14742500-14743070	0.308329	0	-Inf	0.460549	0	-Inf	AT2G40060 (E=6e-064) | protein binding / structural molecule
Bra008993	A10:14759734-14760184	18.6692	0	-Inf	11.855	0	-Inf	AT5G11070 (E=2e-055) | unknown protein
Bra009003	A10:14808969-14810274	1.68402	0	-Inf	3.89478	0	-Inf	AT5G10930 (E=1e-144) CIPK5, SnRK3.24 | CIPK5 (CBL-INTERACTING PROTEIN KINASE 5); ATP binding / kinase/ protein kinase/ protein serine/threonine kinase
Bra009007	A10:14842527-14844304	72.7241	0	-Inf	51.5862	0	-Inf	AT5G10770 (E=4e-144) | chloroplast nucleoid DNA-binding protein, putative
Bra009025	A10:14910577-14912900	0.0661378	0	-Inf	0.0424566	0	-Inf	AT5G10520 (E=2e-210) RBK1 | RBK1 (Rop Binding protein Kinases 1); ATP binding / kinase/ protein kinase/ protein serine/threonine kinase
Bra009026	A10:14913483-14918261	0.0707958	0	-Inf	0.0226969	0	-Inf	AT5G10510 (E=6e-225) AIL6 | AIL6 (AINTEGUMENTA-LIKE 6); DNA binding / transcription factor
Bra009030	A10:14936310-14944049	0.0243684	0	-Inf	0.0207799	0	-Inf	AT5G65440 (E=2e-274) | unknown protein
Bra009038	A10:14982142-14987726	0.687357	0	-Inf	0.653991	0	-Inf	AT5G10370 (E=0.0) | helicase domain-containing protein / IBR domain-containing protein / zinc finger protein-related
Bra009047	A10:15019051-15021603	2.14056	0	-Inf	0.569059	0	-Inf	AT5G10250 (E=5e-164) DOT3 | DOT3 (DEFECTIVELY ORGANIZED TRIBUTARIES 3); protein binding / signal transducer
Bra009056	A10:15058730-15059554	0.237476	0	-Inf	0.156479	0	-Inf	AT5G10130 (E=2e-073) | pollen Ole e 1 allergen and extensin family protein
Bra009070	A10:15116081-15117803	0.0675549	0	-Inf	0.0866689	0	-Inf	AT5G09970 (E=3e-284) CYP78A7 | CYP78A7; electron carrier/ heme binding / iron ion binding / monooxygenase/ oxygen binding
Bra009072	A10:15136898-15139835	0.351764	0	-Inf	0.535243	0	-Inf	AT5G09930 (E=3e-296) ATGCN2, GCN2 | ATGCN2; transporter
Bra009079	A10:15158788-15161522	0.224462	0	-Inf	0.481312	0	-Inf	AT5G09840 (E=5e-282) | unknown protein
Bra009080	A10:15161748-15162608	43.4349	0	-Inf	12.1327	0	-Inf	AT5G09830 (E=1e-029) | BolA-like family protein
Bra009089	A10:15208195-15210877	0.619085	0	-Inf	0.359599	0	-Inf	AT5G05130 (E=9e-271) | SNF2 domain-containing protein / helicase domain-containing protein / RING finger domain-containing protein
Bra009093	A10:15227205-15229065	0.282597	0	-Inf	0.192523	0	-Inf	AT5G05190 (E=2e-121) | unknown protein
Bra009096	A10:15236992-15237409	0.370938	0	-Inf	1.11875	0	-Inf	AT5G05220 (E=8e-049) | unknown protein
Bra009098	A10:15240278-15242321	0.0518949	0	-Inf	0.0532832	0	-Inf	AT5G05240 (E=7e-169) | FUNCTIONS IN: molecular_function unknown; INVOLVED IN: biological_process unknown; LOCATED IN: cellular_component unknown; CONTAINS InterPro DOMAIN/s: Uncharacterised conserved protein UCP030365 (InterPro:IPR016953); BEST Arabidopsis thaliana protein match is: unknown protein (TAIR:AT2G40630.1); Has 24 Blast hits to 24 proteins in 7 species: Archae - 0; Bacteria - 0; Metazo…
Bra009099	A10:15244139-15244829	0.187008	0	-Inf	0.16181	0	-Inf	AT5G05250 (E=5e-100) | unknown protein
Bra009106	A10:15271977-15273282	0.598763	0	-Inf	2.70872	0	-Inf	AT3G10980 (E=7e-165) | unknown protein
Bra009110	A10:15279040-15279688	0.659707	0	-Inf	1.35455	0	-Inf	AT5G05380 (E=2e-081) PRA1.B3 | PRA1.B3 (PRENYLATED RAB ACCEPTOR 1.B3)
Bra009119	A10:15309911-15310667	0.0268499	0	-Inf	0.104301	0	-Inf	AT5G05550 (E=2e-078) | transcription factor
Bra009131	A10:15360473-15361499	8.36291	0	-Inf	9.82309	0	-Inf	AT5G05750 (E=1e-086) | DNAJ heat shock N-terminal domain-containing protein
Bra009137	A10:15384707-15386589	0.0598278	0	-Inf	0.0257269	0	-Inf	AT3G11320 (E=1e-164) | organic anion transmembrane transporter
Bra009143	A10:15406033-15408681	5.94878	0	-Inf	0.761049	0	-Inf	AT5G05870 (E=6e-198) UGT76C1 | UGT76C1 (UDP-glucosyl transferase 76C1); UDP-glycosyltransferase/ cis-zeatin O-beta-D-glucosyltransferase/ cytokinin 7-beta-glucosyltransferase/ cytokinin 9-beta-glucosyltransferase/ trans-zeatin O-beta-D-glucosyltransferase/ transferase, transferring gly
Bra009153	A10:15444291-15444822	2.79823	0	-Inf	5.87329	0	-Inf	AT5G05950 (E=1e-069) MEE60 | MEE60 (maternal effect embryo arrest 60)
Bra009155	A10:15450430-15454245	0.167386	0	-Inf	0.0171526	0	-Inf	AT5G05970 (E=1e-297) NEDD1 | NEDD1 (NEURAL PRECURSOR CELL EXPRESSED, DEVELOPMENTALLY DOWN-REGULATED GENE 1); nucleotide binding
Bra009184	A10:15568668-15569382	34.01	0	-Inf	54.8675	0	-Inf	AT5G06320 (E=2e-084) NHL3 | NHL3
Bra009188	A10:15580861-15582463	7.29259	0	-Inf	11.4081	0	-Inf	AT5G06360 (E=2e-139) | ribosomal protein S8e family protein
Bra009192	A10:15593894-15595214	0.592187	0	-Inf	0.031915	0	-Inf	AT5G06410 (E=1e-094) | DNAJ heat shock N-terminal domain-containing protein
Bra009193	A10:15595752-15598041	0.00913384	0	-Inf	0.0351448	0	-Inf	AT3G11710 (E=5e-217) ATKRS-1 | ATKRS-1 (ARABIDOPSIS THALIANA LYSYL-TRNA SYNTHETASE 1); ATP binding / aminoacyl-tRNA ligase/ lysine-tRNA ligase/ nucleic acid binding / nucleotide binding
Bra009204	A10:15632601-15634143	0.162117	0	-Inf	0.338065	0	-Inf	AT5G06540 (E=2e-260) | pentatricopeptide (PPR) repeat-containing protein
Bra009205	A10:15634566-15636369	1.66566	0	-Inf	4.83549	0	-Inf	AT5G06550 (E=1e-217) | FUNCTIONS IN: molecular_function unknown; INVOLVED IN: cell surface receptor linked signal transduction; EXPRESSED IN: 19 plant structures; EXPRESSED DURING: 12 growth stages; CONTAINS InterPro DOMAIN/s: Cyclin-like F-box (InterPro:IPR001810), Transcription factor jumonji/aspartyl beta-hydroxylase (InterPro:IPR003347), Transcription factor jumonji (InterPro:IPR013129); BEST…
Bra009209	A10:15647445-15649070	1.32993	0	-Inf	1.20347	0	-Inf	AT5G06590 (E=6e-111) | unknown protein
Bra009216	A10:15687555-15689637	0.495416	0	-Inf	0.297628	0	-Inf	AT5G06680 (E=5e-099) SPC98, ATGCP3, ATSPC98, GCP3 | SPC98 (SPINDLE POLE BODY COMPONENT 98); tubulin binding
Bra009218	A10:15694019-15696494	1.84671	0	-Inf	0.950676	0	-Inf	AT5G06700 (E=1e-234) | unknown protein
Bra009226	A10:15725491-15727012	0.118	0	-Inf	0.0761014	0	-Inf	AT5G06780 (E=1e-125) | emsy N terminus domain-containing protein / ENT domain-containing protein
Bra009229	A10:15739413-15741341	10.117	0	-Inf	5.02961	0	-Inf	AT4G34710 (E=1e-123) ADC2, SPE2, ATADC2 | ADC2 (ARGININE DECARBOXYLASE 2); arginine decarboxylase
Bra009235	A10:15766917-15768022	1.05799	0	-Inf	0.84062	0	-Inf	AT5G06860 (E=6e-138) PGIP1, ATPGIP1 | PGIP1 (POLYGALACTURONASE INHIBITING PROTEIN 1); protein binding
Bra009236	A10:15769157-15770259	0.335031	0	-Inf	0.113597	0	-Inf	AT5G06860 (E=5e-138) PGIP1, ATPGIP1 | PGIP1 (POLYGALACTURONASE INHIBITING PROTEIN 1); protein binding
Bra009238	A10:15772979-15774070	0.764553	0	-Inf	0.29784	0	-Inf	AT5G06860 (E=4e-133) PGIP1, ATPGIP1 | PGIP1 (POLYGALACTURONASE INHIBITING PROTEIN 1); protein binding
Bra009239	A10:15776112-15778689	0.13736	0	-Inf	0.00879815	0	-Inf	AT5G06930 (E=8e-278) | LOCATED IN: chloroplast; EXPRESSED IN: 15 plant structures; EXPRESSED DURING: 7 growth stages; BEST Arabidopsis thaliana protein match is: nucleolar protein gar2-related (TAIR:AT2G42320.2); Has 3144 Blast hits to 1363 proteins in 247 species: Archae - 2; Bacteria - 721; Metazoa - 835; Fungi - 297; Plants - 80; Viruses - 10; Other Eukaryotes - 1199 (source: NCBI BLink).
Bra009240	A10:15778818-15781495	0.122168	0	-Inf	0.0355434	0	-Inf	AT5G06940 (E=0.0) | leucine-rich repeat family protein
Bra009246	A10:15811004-15812023	0.0670399	0	-Inf	0.0577312	0	-Inf	AT5G07680 (E=1e-129) ANAC080, ANAC079, ATNAC4 | ANAC080 (ARABIDOPSIS NAC DOMAIN CONTAINING PROTEIN 80); transcription factor
Bra009258	A10:15855453-15857630	0.0231977	0	-Inf	0.0599574	0	-Inf	AT5G07480 (E=6e-086) | oxidoreductase, 2OG-Fe(II) oxygenase family protein
Bra009269	A10:15898156-15901141	0.122961	0	-Inf	0.0689437	0	-Inf	AT5G07360 (E=1e-308) | amidase family protein
Bra009271	A10:15907662-15909428	0.0629234	0	-Inf	0.080854	0	-Inf	AT5G07320 (E=6e-120) | mitochondrial substrate carrier family protein
Bra009277	A10:15948247-15951949	0.104648	0	-Inf	0.19597	0	-Inf	AT5G07280 (E=2e-270) EMS1, EXS | EMS1 (EXCESS MICROSPOROCYTES1); kinase/ transmembrane receptor protein kinase
Bra009279	A10:15957003-15958549	3.49731	0	-Inf	3.79278	0	-Inf	AT5G07250 (E=9e-117) ATRBL3 | ATRBL3 (ARABIDOPSIS RHOMBOID-LIKE PROTEIN 3)
Bra009294	A10:16028782-16030105	0.134849	0	-Inf	0.157496	0	-Inf	AT5G45820 (E=4e-136) CIPK20, SnRK3.6, PKS18 | CIPK20 (CBL-INTERACTING PROTEIN KINASE 20); kinase/ protein serine/threonine kinase
Bra009300	A10:16052105-16053161	0.0494248	0	-Inf	0.148497	0	-Inf	AT5G07010 (E=8e-174) ATST2A, ST2A | ST2A (SULFOTRANSFERASE 2A); hydroxyjasmonate sulfotransferase/ sulfotransferase
Bra009301	A10:16056663-16057419	0.724946	0	-Inf	1.56451	0	-Inf	AT5G06990 (E=6e-085) | unknown protein
Bra009304	A10:16070367-16071194	0.0355909	0	-Inf	0.092608	0	-Inf	AT5G01750 (E=4e-032) | unknown protein
Bra009315	A10:16134240-16135975	4.02976	0	-Inf	5.49831	0	-Inf	AT5G08010 (E=4e-140) | unknown protein
Bra009323	A10:16169918-16171058	3.82068	0	-Inf	3.72961	0	-Inf	AT5G08139 (E=1e-054) | zinc finger (C3HC4-type RING finger) family protein
Bra009329	A10:16201475-16203473	1.94994	0	-Inf	0.975594	0	-Inf	AT5G08200 (E=2e-165) | peptidoglycan-binding LysM domain-containing protein
Bra009332	A10:16215398-16216419	0.202073	0	-Inf	0.784298	0	-Inf	AT5G08240 (E=6e-087) | unknown protein
Bra009338	A10:16245733-16246444	2.84647	0	-Inf	5.26789	0	-Inf	AT5G08330 (E=1e-074) | TCP family transcription factor, putative
Bra009339	A10:16251121-16252628	0.293692	0	-Inf	0.378333	0	-Inf	AT1G22090 (E=3e-046) emb2204 | emb2204 (embryo defective 2204)
Bra009353	A10:16308212-16309910	0.237863	0	-Inf	0.24864	0	-Inf	AT5G08580 (E=1e-189) | calcium-binding EF hand family protein
Bra009365	A10:16356725-16358808	0.0147839	0	-Inf	0.0947196	0	-Inf	AT5G08730 (E=3e-124) | IBR domain-containing protein
Bra009368	A10:16366992-16367877	1.11981	0	-Inf	1.71827	0	-Inf	AT5G08770 (E=4e-070) | unknown protein
Bra009374	A10:16390630-16390975	4.39844	0	-Inf	4.31079	0	-Inf	AT5G09270 (E=3e-045) | unknown protein
Bra009375	A10:16391239-16392554	0.179022	0	-Inf	0.268711	0	-Inf	AT5G09280 (E=4e-141) | pectate lyase family protein
Bra009377	A10:16394350-16395185	2.61901	0	-Inf	3.15275	0	-Inf	AT5G09320 (E=3e-100) VPS9B | VPS9B
Bra009378	A10:16395506-16397562	0.233599	0	-Inf	0.182471	0	-Inf	AT5G09320 (E=2e-179) VPS9B | VPS9B
Bra009415	A10:16537625-16539271	0.273314	0	-Inf	0.097691	0	-Inf	AT5G04890 (E=2e-049) RTM2 | RTM2 (RESTRICTED TEV MOVEMENT 2)
Bra009416	A10:16540686-16544907	0.0155457	0	-Inf	0.0198966	0	-Inf	AT5G04890 (E=1e-050) RTM2 | RTM2 (RESTRICTED TEV MOVEMENT 2)
Bra009417	A10:16545654-16556084	0.121507	0	-Inf	0.0233407	0	-Inf	AT5G04885 (E=0.0) | glycosyl hydrolase family 3 protein
Bra009421	A10:16560358-16563413	1.52078	0	-Inf	1.89717	0	-Inf	AT5G04860 (E=0.0) | unknown protein
Bra009423	A10:16568764-16570206	1.82565	0	-Inf	1.60364	0	-Inf	AT5G26120 (E=9e-098) ATASD2, ASD2 | ASD2 (ALPHA-L-ARABINOFURANOSIDASE 2); alpha-N-arabinofuranosidase/ hydrolase, acting on glycosyl bonds
Bra009428	A10:16602515-16603304	0.954196	0	-Inf	0.292356	0	-Inf	AT5G04820 (E=2e-089) ATOFP13, OFP13 | OFP13 (ARABIDOPSIS THALIANA OVATE FAMILY PROTEIN 13)
Bra009437	A10:16637234-16638737	0.0522766	0	-Inf	0.134193	0	-Inf	AT5G04630 (E=5e-228) CYP77A9 | CYP77A9; electron carrier/ heme binding / iron ion binding / monooxygenase/ oxygen binding
Bra009439	A10:16642038-16643262	0.311515	0	-Inf	0.574616	0	-Inf	AT5G04610 (E=5e-105) | spermidine synthase-related / putrescine aminopropyltransferase-related
Bra009445	A10:16676644-16678036	0.0229972	0	-Inf	0.0442999	0	-Inf	AT5G04530 (E=8e-236) KCS19 | KCS19 (3-KETOACYL-COA SYNTHASE 19); acyltransferase/ catalytic/ transferase, transferring acyl groups other than amino-acyl groups
Bra009446	A10:16679006-16679626	0.54661	0	-Inf	0.195436	0	-Inf	None
Bra009469	A10:16813437-16817545	0.0197484	0	-Inf	0.0253391	0	-Inf	AT5G04310 (E=9e-226) | pectate lyase family protein
Bra009478	A10:16853792-16855004	0.480146	0	-Inf	0.0881919	0	-Inf	AT5G04190 (E=1e-142) PKS4 | PKS4 (phytochrome kinase substrate 4)
Bra009479	A10:16856399-16857801	1.71663	0	-Inf	0.179872	0	-Inf	AT5G04180 (E=7e-126) ATACA3, ACA3 | ACA3 (ALPHA CARBONIC ANHYDRASE 3); carbonate dehydratase/ zinc ion binding
Bra009482	A10:16864829-16865894	0.0162861	0	-Inf	0.0209686	0	-Inf	AT2G21950 (E=4e-051) SKIP6 | SKIP6 (SKP1 interacting partner 6); ubiquitin-protein ligase
Bra009490	A10:16895304-16897560	0.433615	0	-Inf	0.348134	0	-Inf	AT5G04050 (E=3e-272) | FUNCTIONS IN: molecular_function unknown; INVOLVED IN: RNA splicing; LOCATED IN: cellular_component unknown; EXPRESSED IN: 21 plant structures; EXPRESSED DURING: 13 growth stages; CONTAINS InterPro DOMAIN/s: Intron maturase, type II (InterPro:IPR000442); BEST Arabidopsis thaliana protein match is: intron maturase, type II family protein (TAIR:AT1G74350.1); Has 2089 Blast hi…
Bra009495	A10:16918900-16920807	1.24948	0	-Inf	0.597298	0	-Inf	AT5G03990 (E=5e-085) | unknown protein
Bra009498	A10:16930027-16931498	0.0147126	0	-Inf	0.0189266	0	-Inf	AT5G03960 (E=2e-126) IQD12 | IQD12 (IQ-domain 12); calmodulin binding
Bra009501	A10:16944664-16945845	3.40801	0	-Inf	3.80286	0	-Inf	AT5G03905 (E=4e-055) | hesB-like domain-containing protein
Bra009517	A10:17035428-17036836	0.0479427	0	-Inf	0.0205723	0	-Inf	AT5G03690 (E=4e-195) | fructose-bisphosphate aldolase, putative
Bra009531	A10:17104519-17106047	4.50133	0	-Inf	2.26274	0	-Inf	AT5G03380 (E=4e-027) | heavy-metal-associated domain-containing protein
Bra009543	A10:17166255-17166786	21.6736	0	-Inf	19.0215	0	-Inf	AT5G03230 (E=3e-057) | unknown protein
Bra009548	A10:17184696-17186929	4.18969	0	-Inf	4.83381	0	-Inf	AT5G03160 (E=8e-218) ATP58IPK | ATP58IPK (ARABIDOPSIS HOMOLOG OF MAMALLIAN P58IPK); binding / heat shock protein binding
Bra009559	A10:17221758-17223048	2.94901	0	-Inf	0.106069	0	-Inf	AT5G02890 (E=2e-122) | transferase family protein
Bra009561	A10:17228134-17229397	1.74294	0	-Inf	3.74466	0	-Inf	AT5G02850 (E=2e-110) | hydroxyproline-rich glycoprotein family protein
Bra009567	A10:17245226-17247326	3.19002	0	-Inf	4.17688	0	-Inf	AT5G47580 (E=0.0) | unknown protein
Bra009575	A10:17267657-17268140	4.40045	0	-Inf	0.331997	0	-Inf	AT5G02640 (E=9e-056) | unknown protein
Bra009577	A10:17273855-17274760	9.07674	0	-Inf	9.61125	0	-Inf	AT5G02610 (E=1e-058) | 60S ribosomal protein L35 (RPL35D)
Bra009578	A10:17275428-17276596	3.69114	0	-Inf	5.94018	0	-Inf	AT5G02600 (E=3e-067) | heavy-metal-associated domain-containing protein
Bra009585	A10:17318920-17320468	18.6864	0	-Inf	10.5725	0	-Inf	AT5G02480 (E=4e-230) | LOCATED IN: cellular_component unknown; EXPRESSED IN: 22 plant structures; EXPRESSED DURING: 13 growth stages; CONTAINS InterPro DOMAIN/s: Heat shock protein Hsp20 (InterPro:IPR002068), HSP20-like chaperone (InterPro:IPR008978); BEST Arabidopsis thaliana protein match is: SLT1 (sodium- and lithium-tolerant 1) (TAIR:AT2G37570.1); Has 60 Blast hits to 60 proteins in 8 species…
Bra009590	A10:17342247-17342574	0.468335	0	-Inf	0.327396	0	-Inf	AT5G02420 (E=2e-037) | unknown protein
Bra009592	A10:17349491-17351708	0.0250217	0	-Inf	0.0321505	0	-Inf	AT1G70160 (E=1e-082) | unknown protein
Bra009594	A10:17366898-17369706	0.071578	0	-Inf	0.122199	0	-Inf	AT5G02390 (E=2e-280) | unknown protein
Bra009596	A10:17371367-17375267	0.172688	0	-Inf	0.0553574	0	-Inf	AT5G02370 (E=1e-251) | kinesin motor protein-related
Bra009597	A10:17378727-17381095	0.924726	0	-Inf	0.612415	0	-Inf	AT5G02320 (E=1e-196) ATMYB3R5, MYB3R-5 | MYB3R-5 (MYB DOMAIN PROTEIN 3R-5); DNA binding / transcription factor
Bra009610	A10:17428903-17429737	0.136834	0	-Inf	0.212677	0	-Inf	AT5G02140 (E=5e-116) | thaumatin-like protein, putative
Bra009617	A10:17449916-17450902	9.32064	0	-Inf	20.261	0	-Inf	AT5G02050 (E=4e-098) | mitochondrial glycoprotein family protein / MAM33 family protein
Bra009630	A10:17511151-17512174	0.516188	0	-Inf	0.531942	0	-Inf	AT5G01170 (E=1e-077) | glycine-rich protein
Bra009631	A10:17512566-17514522	0.0269398	0	-Inf	0.057583	0	-Inf	AT5G01180 (E=5e-265) PTR5, ATPTR5 | PTR5 (PEPTIDE TRANSPORTER 5); dipeptide transporter/ transporter
Bra009632	A10:17521414-17522659	0.569729	0	-Inf	0.59609	0	-Inf	AT5G01210 (E=6e-101) | transferase family protein
Bra009634	A10:17528239-17528689	0.299907	0	-Inf	0.398489	0	-Inf	AT5G01225 (E=2e-009) | unknown protein
Bra009637	A10:17544580-17545576	0.892738	0	-Inf	0.805267	0	-Inf	AT5G01250 (E=9e-158) | alpha 1,4-glycosyltransferase family protein / glycosyltransferase sugar-binding DXD motif-containing protein
Bra009642	A10:17571970-17575243	0.0646256	0	-Inf	0.0207102	0	-Inf	AT5G01660 (E=8e-173) | FUNCTIONS IN: molecular_function unknown; INVOLVED IN: biological_process unknown; LOCATED IN: cellular_component unknown; EXPRESSED IN: 9 plant structures; EXPRESSED DURING: 6 growth stages; CONTAINS InterPro DOMAIN/s: Kelch repeat type 1 (InterPro:IPR006652), Galactose oxidase/kelch, beta-propeller (InterPro:IPR011043), Development and cell death domain (InterPro:IPR01398…
Bra009665	A06:16442887-16445488	0.936231	0	-Inf	0.497523	0	-Inf	AT2G17110 (E=8e-214) | unknown protein
Bra009667	A06:16455424-16456177	7.75474	0	-Inf	3.88394	0	-Inf	AT5G23280 (E=4e-046) | TCP family transcription factor, putative
Bra009672	A06:16471106-16471745	0.854183	0	-Inf	0.0935179	0	-Inf	AT5G23370 (E=5e-091) | GRAM domain-containing protein / ABA-responsive protein-related
Bra009674	A06:16477409-16478051	0.176482	0	-Inf	0.367307	0	-Inf	AT5G23370 (E=4e-089) | GRAM domain-containing protein / ABA-responsive protein-related
Bra009675	A06:16486161-16486797	1.07672	0	-Inf	0.140104	0	-Inf	AT5G23370 (E=9e-093) | GRAM domain-containing protein / ABA-responsive protein-related
Bra009677	A06:16501890-16502532	1.23537	0	-Inf	0.367307	0	-Inf	AT5G23370 (E=2e-093) | GRAM domain-containing protein / ABA-responsive protein-related
Bra009701	A06:16637632-16638346	1.23673	0	-Inf	2.3291	0	-Inf	AT5G23680 (E=2e-034) | sterile alpha motif (SAM) domain-containing protein
Bra009703	A06:16647902-16651681	0.0310613	0	-Inf	0.0265765	0	-Inf	AT5G23700 (E=7e-094) | unknown protein
Bra009715	A06:16712113-16718223	0.911503	0	-Inf	1.97707	0	-Inf	AT5G23930 (E=3e-079) | mitochondrial transcription termination factor-related / mTERF-related
Bra009722	A06:16845478-16847140	0.6662	0	-Inf	0.40352	0	-Inf	AT5G24010 (E=8e-265) | protein kinase family protein
Bra009723	A06:16847950-16848475	7.60952	0	-Inf	9.16808	0	-Inf	AT5G24020 (E=2e-095) MIND, ARC11, ATMIND1 | MIND; ATPase/ calcium-dependent ATPase/ protein binding / protein homodimerization
Bra009731	A06:16888918-16890715	0.0816806	0	-Inf	0.237148	0	-Inf	AT5G24090 (E=1e-134) | acidic endochitinase (CHIB1)
Bra009733	A06:16906989-16907796	1.13991	0	-Inf	2.54023	0	-Inf	AT4G27990 (E=7e-065) | YGGT family protein
Bra009734	A06:16909297-16910660	0.849655	0	-Inf	0.224125	0	-Inf	AT5G24110 (E=6e-117) WRKY30, ATWRKY30 | WRKY30; transcription factor
Bra009741	A06:16948542-16956639	0.0115876	0	-Inf	0.0074063	0	-Inf	AT5G24280 (E=0.0) | EXPRESSED IN: 17 plant structures; EXPRESSED DURING: 6 growth stages; BEST Arabidopsis thaliana protein match is: DMS3 (DEFECTIVE IN MERISTEM SILENCING 3) (TAIR:AT3G49250.1); Has 61 Blast hits to 57 proteins in 12 species: Archae - 0; Bacteria - 2; Metazoa - 8; Fungi - 2; Plants - 46; Viruses - 0; Other Eukaryotes - 3 (source: NCBI BLink).
Bra009745	A06:16979003-16987827	0.495181	0	-Inf	0.260424	0	-Inf	AT5G24280 (E=0.0) | EXPRESSED IN: 17 plant structures; EXPRESSED DURING: 6 growth stages; BEST Arabidopsis thaliana protein match is: DMS3 (DEFECTIVE IN MERISTEM SILENCING 3) (TAIR:AT3G49250.1); Has 61 Blast hits to 57 proteins in 12 species: Archae - 0; Bacteria - 2; Metazoa - 8; Fungi - 2; Plants - 46; Viruses - 0; Other Eukaryotes - 3 (source: NCBI BLink).
Bra009754	A06:17035291-17038343	2.99214	0	-Inf	1.9551	0	-Inf	AT5G24360 (E=0.0) ATIRE1-1, IRE1-1 | IRE1-1 (INOSITOL REQUIRING 1-1); ATP binding / endoribonuclease, producing 5'-phosphomonoesters / kinase/ protein kinase/ protein serine/threonine kinase
Bra009767	A06:17104696-17105575	8.68538	0	-Inf	9.72527	0	-Inf	AT5G24460 (E=3e-106) | unknown protein
Bra009773	A06:17160635-17162178	1.05204	0	-Inf	0.332876	0	-Inf	AT5G24580 (E=2e-074) | copper-binding family protein
Bra009775	A06:17179635-17181122	0.0547337	0	-Inf	0.0354462	0	-Inf	AT5G24600 (E=4e-129) | unknown protein
Bra009779	A06:17204279-17205479	0.236254	0	-Inf	0.0178701	0	-Inf	None
Bra009784	A06:17237467-17243536	0.0298242	0	-Inf	0.00763745	0	-Inf	AT2G18540 (E=3e-009) | cupin family protein
Bra009788	A06:17267497-17268980	0.0699426	0	-Inf	0.0539646	0	-Inf	AT5G24680 (E=7e-169) | FUNCTIONS IN: molecular_function unknown; INVOLVED IN: biological_process unknown; LOCATED IN: cellular_component unknown; CONTAINS InterPro DOMAIN/s: Peptidase C78, ubiquitin fold modifier-specific peptidase 1 and 2 (InterPro:IPR012462); Has 157 Blast hits to 157 proteins in 66 species: Archae - 0; Bacteria - 0; Metazoa - 86; Fungi - 45; Plants - 19; Viruses - 0; Other Euk…
Bra009798	A06:17334827-17337417	0.131537	0	-Inf	0.0602611	0	-Inf	AT5G24850 (E=6e-267) CRY3 | CRY3 (cryptochrome 3); DNA binding / DNA photolyase/ FMN binding
Bra009804	A06:17395434-17395737	2.43183	0	-Inf	1.47775	0	-Inf	AT5G24920 (E=1e-023) AtGDU5 | AtGDU5 (Arabidopsis thaliana GLUTAMINE DUMPER 5)
Bra009809	A06:17413402-17414251	0.673931	0	-Inf	0.232156	0	-Inf	AT5G10750 (E=2e-096) | unknown protein
Bra009815	A06:17444302-17448319	0.0981936	0	-Inf	0.0575686	0	-Inf	AT5G25090 (E=1e-076) | plastocyanin-like domain-containing protein
Bra009818	A06:17471912-17472852	0.0935039	0	-Inf	0.0404526	0	-Inf	AT5G56350 (E=5e-069) | pyruvate kinase, putative
Bra009833	A06:17584548-17585625	0.016041	0	-Inf	0.330405	0	-Inf	AT5G25330 (E=2e-166) | unknown protein
Bra009846	A06:17655864-17657428	2.985	0	-Inf	2.63585	0	-Inf	AT5G25510 (E=4e-248) | serine/threonine protein phosphatase 2A (PP2A) regulatory subunit B', putative
Bra009853	A06:17675524-17678330	0.696461	0	-Inf	0.263375	0	-Inf	AT5G25590 (E=3e-233) | INVOLVED IN: N-terminal protein myristoylation; EXPRESSED IN: 20 plant structures; EXPRESSED DURING: 13 growth stages; CONTAINS InterPro DOMAIN/s: Protein of unknown function DUF630 (InterPro:IPR006868), Protein of unknown function DUF632 (InterPro:IPR006867), Actin-binding FH2 (InterPro:IPR015425); BEST Arabidopsis thaliana protein match is: unknown protein (TAIR:AT1G52320…
Bra009859	A06:17728397-17730864	0.910431	0	-Inf	0.380712	0	-Inf	AT5G25790 (E=6e-154) | transcription factor
Bra009862	A06:17749482-17750157	1.84397	0	-Inf	0.966326	0	-Inf	AT5G25810 (E=3e-078) tny | tny (TINY); DNA binding / transcription factor
Bra009875	A06:17829491-17831356	0.13877	0	-Inf	0.223463	0	-Inf	AT5G26010 (E=3e-142) | catalytic/ protein serine/threonine phosphatase
Bra009882	A06:17845810-17848659	1.99494	0	-Inf	0.831421	0	-Inf	AT5G66900 (E=0.0) | disease resistance protein (CC-NBS-LRR class), putative
Bra009888	A06:17900326-17902762	0.189812	0	-Inf	0.0531637	0	-Inf	AT5G39030 (E=1e-283) | protein kinase family protein
Bra009890	A06:17918651-17919599	4.61202	0	-Inf	4.4912	0	-Inf	AT5G26230 (E=1e-056) | unknown protein
Bra009902	A06:17978694-17979000	0.658282	0	-Inf	0.465911	0	-Inf	AT5G26731 (E=5e-022) | unknown protein
Bra009913	A06:18037625-18041408	0.0769639	0	-Inf	0.0501437	0	-Inf	AT5G26630 (E=1e-046) | MADS-box protein (AGL35)
Bra009935	A06:18175218-18176711	1.3999	0	-Inf	1.31966	0	-Inf	AT2G01390 (E=3e-094) | pentatricopeptide (PPR) repeat-containing protein
Bra009942	A06:18227964-18228309	6.78093	0	-Inf	18.0039	0	-Inf	AT5G27820 (E=1e-057) | ribosomal protein L18 family protein
Bra009949	A06:18258594-18259149	50.3656	0	-Inf	71.8933	0	-Inf	AT5G27670 (E=2e-040) HTA7 | HTA7 (HISTONE H2A 7); DNA binding
Bra009954	A06:18289289-18291238	0.0482045	0	-Inf	0.0154808	0	-Inf	AT5G27470 (E=2e-203) | seryl-tRNA synthetase / serine--tRNA ligase
Bra009969	A06:18382616-18384440	0.182208	0	-Inf	0.530889	0	-Inf	AT5G27330 (E=1e-186) | LOCATED IN: endoplasmic reticulum; EXPRESSED IN: 22 plant structures; EXPRESSED DURING: 12 growth stages; CONTAINS InterPro DOMAIN/s: Prefoldin (InterPro:IPR009053); BEST Arabidopsis thaliana protein match is: unknown protein (TAIR:AT3G05130.1); Has 110457 Blast hits to 56483 proteins in 2051 species: Archae - 1653; Bacteria - 15111; Metazoa - 52441; Fungi - 7858; Plants - …
Bra009970	A06:18385851-18387542	6.40906	0	-Inf	9.23181	0	-Inf	AT5G27320 (E=5e-187) ATGID1C, GID1C | GID1C (GA INSENSITIVE DWARF1C); hydrolase
Bra009974	A06:18404419-18406076	0.163181	0	-Inf	0.419153	0	-Inf	AT5G27220 (E=1e-131) | protein transport protein-related
Bra009986	A06:18469312-18470557	3.81586	0	-Inf	2.65686	0	-Inf	AT5G28040 (E=5e-087) | transcription regulator
Bra009997	A06:18536244-18536823	0.68357	0	-Inf	0.613781	0	-Inf	AT5G28490 (E=2e-075) LSH1 | LSH1 (LIGHT-DEPENDENT SHORT HYPOCOTYLS 1)
Bra010002	A06:18576711-18578656	0.230892	0	-Inf	0.351006	0	-Inf	AT5G28640 (E=7e-050) AN3, GIF, GIF1 | AN3 (ANGUSTIFOLIA 3); protein binding / transcription coactivator
Bra010028	A06:18713761-18717541	1.61123	0	-Inf	1.22275	0	-Inf	AT5G49570 (E=0.0) AtPNG1 | AtPNG1 (Arabidopsis thaliana peptide-N-glycanase 1); catalytic/ peptide-N4-(N-acetyl-beta-glucosaminyl)asparagine amidase
Bra010029	A06:18717948-18718354	1.07423	0	-Inf	1.79588	0	-Inf	AT5G49550 (E=1e-046) | unknown protein
Bra010032	A06:18742048-18744098	0.277946	0	-Inf	0.178701	0	-Inf	AT5G49520 (E=5e-137) WRKY48, ATWRKY48 | WRKY48; transcription factor
Bra010035	A06:18760869-18761298	8.02788	0	-Inf	1.7111	0	-Inf	AT5G49450 (E=1e-055) AtbZIP1 | AtbZIP1 (Arabidopsis thaliana basic leucine-zipper 1); DNA binding / protein heterodimerization/ transcription factor
Bra010083	A06:19264266-19265335	7.38854	0	-Inf	21.4114	0	-Inf	AT5G62440 (E=2e-071) | Encodes a protein DOMINO1 that belongs to a plant-specific gene family sharing a common motif present in the tomato DEFECTIVE CHLOROPLASTS AND LEAVES (LeDCL) protein. DOMINO1 is located in the nucleus. Arabidopsis embryos carrying the domino1 mutation grow slowly in comparison with wild type embryos and reach only the globular stage at desiccation. The primary defect of the…
Bra010090	A06:19337910-19339610	0.245813	0	-Inf	0.0865967	0	-Inf	AT5G62500 (E=3e-125) ATEB1B, ATEB1, EB1B | ATEB1B (END BINDING PROTEIN 1B); microtubule binding
Bra010096	A06:19383957-19385124	0.386207	0	-Inf	0.0996111	0	-Inf	AT5G62520 (E=2e-134) SRO5 | SRO5 (SIMILAR TO RCD ONE 5); NAD+ ADP-ribosyltransferase
Bra010127	A06:19587235-19587703	0.474958	0	-Inf	0.98803	0	-Inf	AT5G62860 (E=6e-052) | F-box family protein-related
Bra010132	A06:19614590-19616039	0.348773	0	-Inf	0.0569662	0	-Inf	AT5G62920 (E=1e-084) ARR6 | ARR6 (RESPONSE REGULATOR 6); transcription regulator/ two-component response regulator
Bra010134	A06:19633856-19634315	0.0712384	0	-Inf	0.850249	0	-Inf	AT4G30760 (E=3e-007) | unknown protein
Bra010136	A06:19650429-19651936	0.231891	0	-Inf	0.0198954	0	-Inf	AT5G62940 (E=1e-121) | Dof-type zinc finger domain-containing protein
Bra010181	A06:20613007-20613583	3.40928	0	-Inf	3.10069	0	-Inf	AT1G32690 (E=7e-067) | unknown protein
Bra010193	A06:20791878-20794319	1.30937	0	-Inf	1.76865	0	-Inf	AT1G33060 (E=4e-228) ANAC014 | no apical meristem (NAM) family protein
Bra010194	A06:20805958-20806222	1.60543	0	-Inf	3.46445	0	-Inf	AT4G10270 (E=7e-030) | wound-responsive family protein
Bra010232	A08:13325469-13326906	0.221031	0	-Inf	0.184458	0	-Inf	AT4G31540 (E=7e-253) ATEXO70G1 | ATEXO70G1 (exocyst subunit EXO70 family protein G1); protein binding
Bra010235	A08:13345087-13346242	1.63191	0	-Inf	2.39303	0	-Inf	AT4G31460 (E=4e-090) | ribosomal protein L28 family protein
Bra010236	A08:13347003-13348080	0.994544	0	-Inf	0.949916	0	-Inf	AT4G31440 (E=2e-118) | unknown protein
Bra010240	A08:13362777-13363152	0.131531	0	-Inf	0.5376	0	-Inf	AT4G31380 (E=3e-053) FLP1 | FLP1 (FPF1-LIKE PROTEIN 1)
Bra010258	A08:13471765-13476226	0.203384	0	-Inf	0.244659	0	-Inf	AT4G31050 (E=2e-126) | lipoyltransferase (LIP2p)
Bra010289	A08:13670541-13670991	1.04968	0	-Inf	1.39471	0	-Inf	AT4G30370 (E=2e-040) | zinc finger (C3HC4-type RING finger) family protein
Bra010332	A08:13907821-13909452	0.0499268	0	-Inf	0.193748	0	-Inf	AT4G29270 (E=3e-090) | acid phosphatase class B family protein
Bra010333	A08:13910217-13911346	0.0246745	0	-Inf	0.0638251	0	-Inf	AT4G29260 (E=1e-111) | acid phosphatase class B family protein
Bra010346	A08:14010370-14010826	1.44886	0	-Inf	0.192259	0	-Inf	AT4G29020 (E=2e-014) | glycine-rich protein
Bra010348	A08:14017282-14019905	1.18583	0	-Inf	0.272363	0	-Inf	AT2G20110 (E=3e-151) | tesmin/TSO1-like CXC domain-containing protein
Bra010352	A08:14036500-14037068	5.1588	0	-Inf	3.00745	0	-Inf	None
Bra010358	A08:14079662-14082268	0.105571	0	-Inf	0.19837	0	-Inf	AT4G28600 (E=7e-290) NPGR2 | NPGR2 (no pollen germination related 2); calmodulin binding
Bra010368	A08:14153902-14155260	13.4641	0	-Inf	22.5788	0	-Inf	AT4G28440 (E=2e-058) | DNA-binding protein-related
Bra010372	A08:14178102-14180157	0.821322	0	-Inf	1.61542	0	-Inf	AT4G04960 (E=3e-185) | lectin protein kinase, putative
Bra010375	A08:14184941-14185574	0.0361952	0	-Inf	0.0942112	0	-Inf	AT4G28310 (E=4e-052) | unknown protein
Bra010381	A08:14201386-14201647	103.856	0	-Inf	191.802	0	-Inf	AT4G28240 (E=2e-037) | wound-responsive protein-related
Bra010389	A08:14239643-14240630	1.53696	0	-Inf	7.10748	0	-Inf	AT4G27950 (E=4e-114) CRF4 | CRF4 (CYTOKININ RESPONSE FACTOR 4); DNA binding / transcription factor
Bra010395	A08:14304418-14304610	8.71557	0	-Inf	12.292	0	-Inf	AT4G27657 (E=4e-023) | unknown protein
Bra010397	A08:14310609-14310813	5.19913	0	-Inf	22.1777	0	-Inf	AT4G27652 (E=5e-023) | unknown protein
Bra010409	A08:14387802-14392929	28.7406	0	-Inf	17.404	0	-Inf	AT4G27140 (E=3e-040) | 2S seed storage protein 1 / 2S albumin storage protein / NWMU1-2S albumin 1
Bra010415	A08:14414171-14415434	0.0908144	0	-Inf	0.0293323	0	-Inf	AT4G29550 (E=2e-031) | unknown protein
Bra010421	A08:14449061-14449430	0.698184	0	-Inf	0.763145	0	-Inf	AT4G26960 (E=3e-036) | unknown protein
Bra010424	A08:14466843-14470118	61.2235	0	-Inf	40.2948	0	-Inf	AT4G26850 (E=4e-223) VTC2 | VTC2 (vitamin c defective 2); GDP-D-glucose phosphorylase/ GDP-galactose:glucose-1-phosphate guanyltransferase/ GDP-galactose:mannose-1-phosphate guanyltransferase/ GDP-galactose:myoinositol-1-phosphate guanyltransferase/ galactose-1-phosphate guanylyltra
Bra010439	A08:14532647-14539053	2.92152	0	-Inf	2.50915	0	-Inf	AT1G64280 (E=5e-190) NPR1, SAI1, NIM1, ATNPR1 | NPR1 (NONEXPRESSER OF PR GENES 1); protein binding / transcription activator
Bra010447	A08:14576234-14576792	16.9537	0	-Inf	1.56289	0	-Inf	AT4G25780 (E=5e-097) | pathogenesis-related protein, putative
Bra010451	A08:14584779-14588546	0.0570348	0	-Inf	0.00811584	0	-Inf	AT4G25730 (E=3e-229) | FtsJ-like methyltransferase family protein
Bra010480	A08:14746319-14747624	0.0124742	0	-Inf	0.0320558	0	-Inf	AT4G39560 (E=2e-035) | kelch repeat-containing F-box family protein
Bra010485	A08:14774082-14774715	16.9032	0	-Inf	11.1169	0	-Inf	AT4G24660 (E=1e-038) ATHB22, MEE68 | ATHB22 (HOMEOBOX PROTEIN 22); DNA binding / transcription factor
Bra010492	A08:14810152-14810812	0.235383	0	-Inf	0.437012	0	-Inf	AT4G24310 (E=2e-089) | unknown protein
Bra010495	A08:14818669-14819884	0.177768	0	-Inf	0.281302	0	-Inf	None
Bra010496	A08:14822241-14826409	0.183543	0	-Inf	0.404573	0	-Inf	AT5G11250 (E=3e-303) | disease resistance protein (TIR-NBS-LRR class), putative
Bra010498	A08:14832973-14835780	0.682405	0	-Inf	0.166091	0	-Inf	AT4G24280 (E=0.0) cpHsc70-1 | cpHsc70-1 (chloroplast heat shock protein 70-1); ATP binding
Bra010501	A08:14854030-14854345	0.28224	0	-Inf	3.17966	0	-Inf	AT4G36110 (E=1e-051) | auxin-responsive protein, putative
Bra010502	A08:14870063-14870549	4.64641	0	-Inf	10.6283	0	-Inf	AT4G36040 (E=8e-065) | DNAJ heat shock N-terminal domain-containing protein (J11)
Bra010504	A08:14881512-14882471	0.111225	0	-Inf	0.512077	0	-Inf	AT4G35900 (E=1e-057) FD, FD-1, atbzip14 | FD; DNA binding / protein binding / transcription activator/ transcription factor
Bra010528	A08:14991313-14992615	12.0479	0	-Inf	34.6743	0	-Inf	AT4G35630 (E=1e-227) PSAT | PSAT; O-phospho-L-serine:2-oxoglutarate aminotransferase
Bra010532	A08:15012532-15013114	5.87961	0	-Inf	10.715	0	-Inf	AT4G35480 (E=6e-074) RHA3B | RHA3B; protein binding / zinc ion binding
Bra010568	A08:15232084-15233308	1.66593	0	-Inf	1.68902	0	-Inf	AT4G36680 (E=1e-171) | pentatricopeptide (PPR) repeat-containing protein
Bra010582	A08:15319448-15321265	0.0587609	0	-Inf	0.120755	0	-Inf	AT4G37130 (E=5e-126) | hydroxyproline-rich glycoprotein family protein
Bra010591	A08:15365726-15367382	0.154234	0	-Inf	0.0220744	0	-Inf	AT4G36930 (E=4e-101) SPT | SPT (SPATULA); DNA binding / transcription factor
Bra010593	A08:15398268-15399186	5.93075	0	-Inf	7.13435	0	-Inf	AT4G37260 (E=3e-130) MYB73, ATMYB73 | MYB73 (MYB DOMAIN PROTEIN 73); DNA binding / transcription factor
Bra010597	A08:15423633-15425843	0.0422356	0	-Inf	0.0677651	0	-Inf	AT4G37400 (E=5e-262) CYP81F3 | CYP81F3; electron carrier/ heme binding / iron ion binding / monooxygenase/ oxygen binding
Bra010602	A08:15473260-15474849	1.75596	0	-Inf	2.87505	0	-Inf	AT4G37580 (E=1e-215) HLS1, COP3, UNS2 | HLS1 (HOOKLESS 1); N-acetyltransferase
Bra010606	A08:15498935-15500342	0.283641	0	-Inf	0.0582759	0	-Inf	AT4G37650 (E=1e-224) SHR, SGR7 | SHR (SHORT ROOT); protein binding / sequence-specific DNA binding / transcription factor
Bra010607	A08:15502622-15503132	19.8725	0	-Inf	34.4568	0	-Inf	AT4G37660 (E=2e-063) | ribosomal protein L12 family protein
Bra010610	A08:15522724-15525119	0.194308	0	-Inf	0.118682	0	-Inf	AT4G37750 (E=7e-210) ANT, DRG, CKC, CKC1 | ANT (AINTEGUMENTA); DNA binding / transcription factor
Bra010612	A08:15562650-15563652	1.77456	0	-Inf	3.03834	0	-Inf	AT4G37790 (E=1e-099) HAT22 | HAT22; transcription factor
Bra010614	A08:15593595-15594675	2.52498	0	-Inf	2.0778	0	-Inf	AT4G37820 (E=2e-025) | unknown protein
Bra010615	A08:15595045-15595920	608.312	0	-Inf	589.997	0	-Inf	AT4G37830 (E=5e-052) | cytochrome c oxidase-related
Bra010619	A08:15612311-15615200	0.0246526	0	-Inf	0.0631377	0	-Inf	AT4G37900 (E=2e-286) | glycine-rich protein
Bra010620	A08:15616220-15618653	5.21456	0	-Inf	9.62932	0	-Inf	AT4G37910 (E=0.0) mtHsc70-1 | mtHsc70-1 (mitochondrial heat shock protein 70-1); ATP binding
Bra010623	A08:15624500-15627760	0.140026	0	-Inf	0.0455292	0	-Inf	AT4G37940 (E=8e-079) AGL21 | AGL21; transcription factor
Bra010628	A08:15677650-15678916	1.1152	0	-Inf	0.733306	0	-Inf	AT4G38010 (E=2e-197) | pentatricopeptide (PPR) repeat-containing protein
Bra010640	A08:15732555-15733748	3.18483	0	-Inf	3.56877	0	-Inf	AT4G40080 (E=1e-169) | epsin N-terminal homology (ENTH) domain-containing protein / clathrin assembly protein-related
Bra010649	A08:15779788-15780877	0.158032	0	-Inf	0.183074	0	-Inf	AT2G21950 (E=2e-052) SKIP6 | SKIP6 (SKP1 interacting partner 6); ubiquitin-protein ligase
Bra010650	A08:15781634-15782363	0.0730103	0	-Inf	0.0950338	0	-Inf	AT5G52930 (E=9e-048) | unknown protein
Bra010653	A08:15795242-15796583	0.0723068	0	-Inf	0.0928846	0	-Inf	AT4G39840 (E=5e-117) | unknown protein
Bra010656	A08:15803661-15806858	0.0795477	0	-Inf	0.0686565	0	-Inf	AT1G60900 (E=4e-068) | U2 snRNP auxiliary factor large subunit, putative
Bra010657	A08:15815509-15816286	0.437176	0	-Inf	1.19803	0	-Inf	AT4G39780 (E=8e-066) | AP2 domain-containing transcription factor, putative
Bra010666	A08:15874131-15875019	0.210243	0	-Inf	0.352796	0	-Inf	AT4G39720 (E=5e-090) | VQ motif-containing protein
Bra010670	A08:15887787-15888468	0.159334	0	-Inf	1.11713	0	-Inf	AT4G39670 (E=5e-103) | glycolipid binding / glycolipid transporter
Bra010673	A08:15901969-15902743	0.181106	0	-Inf	1.03798	0	-Inf	AT4G39610 (E=6e-100) | unknown protein
Bra010678	A08:15939121-15940696	0.671446	0	-Inf	0.101356	0	-Inf	AT1G47620 (E=2e-180) CYP96A8 | CYP96A8; electron carrier/ heme binding / iron ion binding / monooxygenase/ oxygen binding
Bra010694	A08:16026227-16027525	0.987888	0	-Inf	0.917493	0	-Inf	AT4G39230 (E=9e-158) | isoflavone reductase, putative
Bra010697	A08:16035247-16035934	0.219782	0	-Inf	0.285289	0	-Inf	AT4G39190 (E=4e-035) | unknown protein
Bra010704	A08:16054298-16063841	0.367941	0	-Inf	0.328286	0	-Inf	AT4G39110 (E=0.0) | protein kinase family protein
Bra010711	A08:16068798-16069710	0.182038	0	-Inf	0.182679	0	-Inf	AT3G29680 (E=7e-107) | transferase family protein
Bra010730	A08:16160026-16161606	11.7497	0	-Inf	16.5259	0	-Inf	AT4G38710 (E=8e-096) | glycine-rich protein
Bra010733	A08:16168025-16170595	0.225926	0	-Inf	0.254984	0	-Inf	AT4G38650 (E=2e-280) | glycosyl hydrolase family 10 protein
Bra010734	A08:16171601-16173397	1.53561	0	-Inf	1.37407	0	-Inf	AT4G38640 (E=9e-199) | choline transporter-related
Bra010750	A08:16253710-16256694	0.125229	0	-Inf	0.0094391	0	-Inf	AT4G14200 (E=7e-071) | unknown protein
Bra010759	A08:16283815-16286870	0.0443669	0	-Inf	0.0496959	0	-Inf	AT4G14310 (E=1e-265) | INVOLVED IN: biological_process unknown; LOCATED IN: cell wall; EXPRESSED IN: male gametophyte; EXPRESSED DURING: L mature pollen stage, M germinated pollen stage; CONTAINS InterPro DOMAIN/s: WD40 repeat-like (InterPro:IPR011046); Has 1586 Blast hits to 1332 proteins in 204 species: Archae - 6; Bacteria - 138; Metazoa - 590; Fungi - 104; Plants - 66; Viruses - 5; Other Euka…
Bra010780	A08:16413471-16415080	0.70669	0	-Inf	0.504617	0	-Inf	AT1G30280 (E=2e-150) | heat shock protein binding
Bra010786	A08:16444958-16448664	1.42561	0	-Inf	2.94518	0	-Inf	AT1G30240 (E=0.0) | unknown protein
Bra010793	A08:16471767-16473045	0.0155723	0	-Inf	0.821718	0	-Inf	AT1G30170 (E=1e-165) | unknown protein
Bra010794	A08:16473431-16474017	0.223456	0	-Inf	0.151045	0	-Inf	AT1G30135 (E=1e-048) JAZ8, TIFY5A | JAZ8 (JASMONATE-ZIM-DOMAIN PROTEIN 8)
Bra010801	A08:16511408-16512536	0.0753837	0	-Inf	0.0581967	0	-Inf	AT1G30050 (E=6e-121) | unknown protein
Bra010804	A08:16541471-16543862	0.937709	0	-Inf	1.00002	0	-Inf	AT1G30000 (E=3e-303) | glycoside hydrolase family 47 protein
Bra010811	A08:16570487-16570805	0.268856	0	-Inf	0.377942	0	-Inf	None
Bra010814	A08:16575273-16576161	1.99039	0	-Inf	2.20125	0	-Inf	AT1G29760 (E=1e-119) | FUNCTIONS IN: molecular_function unknown; INVOLVED IN: biological_process unknown; LOCATED IN: cellular_component unknown; EXPRESSED IN: 24 plant structures; EXPRESSED DURING: 15 growth stages; CONTAINS InterPro DOMAIN/s: Adipose-regulatory protein, Seipin (InterPro:IPR009617); BEST Arabidopsis thaliana protein match is: unknown protein (TAIR:AT2G34380.1); Has 396 Blast hit…
Bra010823	A08:16655618-16656032	0.0947615	0	-Inf	1.01716	0	-Inf	AT1G29640 (E=2e-031) | unknown protein
Bra010826	A08:16667083-16667500	0.556406	0	-Inf	0.248612	0	-Inf	AT1G29450 (E=6e-057) | auxin-responsive protein, putative
Bra010827	A08:16668400-16668820	1.90658	0	-Inf	0.364758	0	-Inf	AT1G29510 (E=9e-056) SAUR68 | SAUR68 (SMALL AUXIN UPREGULATED 68)
Bra010834	A08:16700415-16702575	2.61888	0	-Inf	2.78836	0	-Inf	AT1G29340 (E=9e-261) PUB17, ATPUB17 | PUB17 (PLANT U-BOX 17); ubiquitin-protein ligase
Bra010835	A08:16707299-16711929	1.84024	0	-Inf	1.98667	0	-Inf	AT1G29330 (E=1e-104) ATERD2, AERD2, ERD2 | ERD2 (ENDOPLASMIC RETICULUM RETENTION DEFECTIVE 2); KDEL sequence binding / receptor
Bra010837	A08:16714997-16716290	0.870914	0	-Inf	0.600103	0	-Inf	AT1G29300 (E=6e-168) UNE1 | UNE1 (unfertilized embryo sac 1)
Bra010845	A08:16758367-16758898	1.06842	0	-Inf	0.467194	0	-Inf	AT1G29195 (E=1e-044) | unknown protein
Bra010848	A08:16778154-16778682	0.154473	0	-Inf	0.743269	0	-Inf	AT1G29160 (E=1e-085) | Dof-type zinc finger domain-containing protein
Bra010857	A08:16813214-16815852	0.458154	0	-Inf	0.1289	0	-Inf	AT1G28670 (E=2e-187) ARAB-1 | ARAB-1; carboxylesterase/ hydrolase, acting on ester bonds
Bra010864	A08:16833826-16838568	0.244185	0	-Inf	0.172056	0	-Inf	AT1G28520 (E=9e-179) VOZ1, ATVOZ1 | VOZ1 (VASCULAR PLANT ONE ZINC FINGER PROTEIN); transcription activator
Bra010876	A08:16898771-16899614	2.47469	0	-Inf	0.821306	0	-Inf	AT1G28400 (E=2e-068) | unknown protein
Bra010878	A08:16904356-16905742	0.11561	0	-Inf	0.193014	0	-Inf	AT1G28390 (E=6e-180) | protein kinase family protein
Bra010880	A08:16923484-16924003	7.37266	0	-Inf	40.8455	0	-Inf	AT1G28370 (E=4e-040) ERF11, ATERF11 | ERF11 (ERF DOMAIN PROTEIN 11); DNA binding / transcription factor/ transcription repressor
Bra010881	A08:16929110-16929665	0.0464454	0	-Inf	0.243129	0	-Inf	AT1G28360 (E=4e-077) ERF12, ATERF12 | ERF12 (ERF DOMAIN PROTEIN 12); DNA binding / transcription factor/ transcription repressor
Bra010885	A08:16951243-16951732	2.80907	0	-Inf	9.90761	0	-Inf	AT1G28280 (E=7e-059) | VQ motif-containing protein
Bra010895	A08:16997753-16998207	1.89663	0	-Inf	0.369663	0	-Inf	AT1G02250 (E=1e-007) anac005 | anac005 (Arabidopsis NAC domain containing protein 5); transcription factor
Bra010898	A08:17006968-17007772	0.487843	0	-Inf	1.7033	0	-Inf	AT1G28190 (E=8e-080) | unknown protein
Bra010923	A08:17131090-17132390	1.35011	0	-Inf	0.421797	0	-Inf	AT1G27700 (E=3e-116) | protein binding
Bra010933	A08:17194797-17197989	5.65843	0	-Inf	5.24711	0	-Inf	AT1G27510 (E=4e-248) | INVOLVED IN: response to singlet oxygen; LOCATED IN: thylakoid membrane; EXPRESSED IN: 22 plant structures; EXPRESSED DURING: 13 growth stages; BEST Arabidopsis thaliana protein match is: EX1 (EXECUTER1) (TAIR:AT4G33630.2); Has 213 Blast hits to 208 proteins in 76 species: Archae - 0; Bacteria - 13; Metazoa - 63; Fungi - 31; Plants - 69; Viruses - 0; Other Eukaryotes - 37 (…
Bra010937	A08:17209093-17210835	4.3268	0	-Inf	9.47061	0	-Inf	AT1G27450 (E=3e-094) APT1, ATAPT1 | APT1 (ADENINE PHOSPHORIBOSYL TRANSFERASE 1); adenine phosphoribosyltransferase
Bra010957	A08:17271800-17272445	0.525098	0	-Inf	1.8667	0	-Inf	AT5G13090 (E=7e-021) | unknown protein
Bra010958	A08:17274408-17276938	0.483527	0	-Inf	0.0774999	0	-Inf	AT1G24280 (E=1e-265) G6PD3 | G6PD3 (GLUCOSE-6-PHOSPHATE DEHYDROGENASE 3); glucose-6-phosphate dehydrogenase
Bra010960	A08:17288031-17291067	0.611096	0	-Inf	0.766318	0	-Inf	AT1G24330 (E=0.0) | armadillo/beta-catenin repeat family protein / U-box domain-containing family protein
Bra010963	A08:17298378-17299626	2.05352	0	-Inf	1.99445	0	-Inf	AT1G24440 (E=1e-137) | protein binding / zinc ion binding
Bra010966	A08:17312956-17313310	0.493221	0	-Inf	0.679077	0	-Inf	None
Bra010970	A08:17327110-17327801	5.74827	0	-Inf	13.7002	0	-Inf	AT1G24575 (E=6e-027) | unknown protein
Bra010974	A08:17350560-17351124	0.764592	0	-Inf	0.588125	0	-Inf	AT1G24620 (E=3e-088) | polcalcin, putative / calcium-binding pollen allergen, putative
Bra010980	A08:17388884-17390733	13.677	0	-Inf	24.878	0	-Inf	AT1G25220 (E=6e-138) ASB1, TRP4, WEI7 | ASB1 (ANTHRANILATE SYNTHASE BETA SUBUNIT 1); anthranilate synthase
Bra010998	A08:17505981-17507061	0.111866	0	-Inf	0.308584	0	-Inf	AT1G25510 (E=2e-173) | aspartyl protease family protein
Bra011004	A08:17556090-17559671	0.160651	0	-Inf	0.11326	0	-Inf	AT1G22570 (E=6e-106) | proton-dependent oligopeptide transport (POT) family protein
Bra011007	A08:17568323-17570239	4.30193	0	-Inf	1.7417	0	-Inf	AT1G26090 (E=9e-189) | unknown protein
Bra011018	A08:17601613-17602204	36.0656	0	-Inf	53.7613	0	-Inf	AT1G26220 (E=2e-093) | GCN5-related N-acetyltransferase (GNAT) family protein
Bra011032	A01:4338691-4341329	0.0454914	0	-Inf	0.0515691	0	-Inf	AT5G46090 (E=3e-048) | unknown protein
Bra011040	A01:4285545-4286871	0.0244478	0	-Inf	0.0314083	0	-Inf	AT4G28560 (E=7e-181) RIC7 | RIC7 (ROP-INTERACTIVE CRIB MOTIF-CONTAINING PROTEIN 7); protein binding
Bra011052	A01:4235603-4236058	6.33623	0	-Inf	3.29879	0	-Inf	AT4G28703 (E=9e-049) | FUNCTIONS IN: molecular_function unknown; LOCATED IN: cellular_component unknown; EXPRESSED IN: 6 plant structures; EXPRESSED DURING: 4 anthesis, F mature embryo stage, petal differentiation and expansion stage, D bilateral stage, E expanded cotyledon stage; CONTAINS InterPro DOMAIN/s: Cupin, RmlC-type (InterPro:IPR011051), Protein of unknown function DUF861, cupin-3 (Inter…
Bra011062	A01:4141207-4151786	0.0233116	0	-Inf	0.0449093	0	-Inf	AT4G28811 (E=2e-015) | transcription regulator
Bra011068	A01:4112283-4113537	0.682611	0	-Inf	1.83913	0	-Inf	AT4G28890 (E=1e-121) | protein binding / ubiquitin-protein ligase/ zinc ion binding
Bra011070	A01:4096141-4098485	0.284471	0	-Inf	1.63779	0	-Inf	AT4G28940 (E=7e-159) | catalytic
Bra011071	A01:4089043-4094694	0.054919	0	-Inf	0.0371734	0	-Inf	AT3G23890 (E=0.0) TOPII, ATTOPII | TOPII (TOPOISOMERASE II); ATP binding / DNA binding / DNA topoisomerase (ATP-hydrolyzing)/ DNA topoisomerase/ DNA-dependent ATPase
Bra011074	A01:4082160-4083712	0.950282	0	-Inf	3.18853	0	-Inf	AT4G28990 (E=1e-070) | RNA-binding protein-related
Bra011084	A01:3976091-3977708	0.0478205	0	-Inf	0.110426	0	-Inf	AT4G29140 (E=7e-263) | MATE efflux protein-related
Bra011086	A01:3963075-3964813	0.14226	0	-Inf	0.0262228	0	-Inf	AT4G34400 (E=3e-035) | DNA binding / transcription factor
Bra011100	A01:3876927-3878906	0.436981	0	-Inf	0.253716	0	-Inf	AT4G29360 (E=4e-120) | glycosyl hydrolase family 17 protein
Bra011103	A01:3865155-3866307	0.014662	0	-Inf	0.018861	0	-Inf	AT4G19870 (E=2e-055) | kelch repeat-containing F-box family protein
Bra011107	A01:3844452-3846340	0.664691	0	-Inf	0.248399	0	-Inf	AT4G29420 (E=8e-195) | F-box family protein
Bra011110	A01:3836640-3838285	0.172063	0	-Inf	0.0443285	0	-Inf	AT4G34400 (E=7e-036) | DNA binding / transcription factor
Bra011119	A01:3812205-3813734	3.09306	0	-Inf	5.20138	0	-Inf	AT4G29520 (E=6e-111) | LOCATED IN: endoplasmic reticulum, plasma membrane; EXPRESSED IN: 23 plant structures; EXPRESSED DURING: 13 growth stages; CONTAINS InterPro DOMAIN/s: Saposin B (InterPro:IPR008139); Has 120 Blast hits to 120 proteins in 43 species: Archae - 2; Bacteria - 0; Metazoa - 42; Fungi - 10; Plants - 19; Viruses - 0; Other Eukaryotes - 47 (source: NCBI BLink).
Bra011123	A01:3796171-3797727	6.14994	0	-Inf	5.03696	0	-Inf	AT4G29550 (E=5e-068) | unknown protein
Bra011128	A01:3777248-3778783	2.5511	0	-Inf	4.25393	0	-Inf	AT4G29680 (E=6e-226) | type I phosphodiesterase/nucleotide pyrophosphatase family protein
Bra011132	A01:3753152-3754778	1.21602	0	-Inf	0.572797	0	-Inf	AT4G29720 (E=9e-247) ATPAO5 | ATPAO5 (Polyamine oxidase 5); amine oxidase/ electron carrier/ oxidoreductase
Bra011150	A01:3664016-3675336	0.039143	0	-Inf	0.00625314	0	-Inf	AT4G29920 (E=0.0) | heat shock protein-related
Bra011164	A01:3577236-3581366	0.410073	0	-Inf	0.0979856	0	-Inf	AT4G30110 (E=0.0) HMA2 | HMA2; cadmium-transporting ATPase
Bra011165	A01:3566550-3569690	0.00640382	0	-Inf	0.0492088	0	-Inf	AT2G19110 (E=1e-284) HMA4 | HMA4; cadmium ion transmembrane transporter/ cadmium-transporting ATPase/ zinc ion transmembrane transporter
Bra011166	A01:3561449-3563794	0.0298786	0	-Inf	0.00957192	0	-Inf	AT4G30130 (E=3e-148) | unknown protein
Bra011170	A01:3530724-3532289	0.846122	0	-Inf	0.71128	0	-Inf	AT4G30170 (E=4e-160) | peroxidase, putative
Bra011175	A01:3475849-3476608	0.186773	0	-Inf	0.276369	0	-Inf	AT4G30230 (E=1e-080) | unknown protein
Bra011181	A01:3453216-3454260	1.59497	0	-Inf	0.60941	0	-Inf	AT1G65310 (E=4e-139) ATXTH17, XTH17 | XTH17 (XYLOGLUCAN ENDOTRANSGLUCOSYLASE/HYDROLASE 17); hydrolase, acting on glycosyl bonds / hydrolase, hydrolyzing O-glycosyl compounds / xyloglucan:xyloglucosyl transferase
Bra011183	A01:3445590-3446097	1.06858	0	-Inf	0.147985	0	-Inf	AT4G30320 (E=3e-074) | allergen V5/Tpx-1-related family protein
Bra011185	A01:3430014-3432439	0.588047	0	-Inf	0.82763	0	-Inf	AT4G30350 (E=3e-266) | heat shock protein-related
Bra011187	A01:3421049-3421532	1.19441	0	-Inf	3.48597	0	-Inf	AT4G30370 (E=5e-056) | zinc finger (C3HC4-type RING finger) family protein
Bra011193	A01:3396130-3397446	0.0511241	0	-Inf	0.264611	0	-Inf	AT4G30430 (E=2e-105) TET9 | TET9 (TETRASPANIN9)
Bra011195	A01:3389291-3389618	4.21501	0	-Inf	0.327396	0	-Inf	AT4G30450 (E=7e-009) | glycine-rich protein
Bra011198	A01:3377883-3380114	0.934163	0	-Inf	0.216765	0	-Inf	AT2G23940 (E=4e-070) | unknown protein
Bra011208	A01:3324758-3325066	131.792	0	-Inf	14.0037	0	-Inf	AT4G30650 (E=9e-034) | hydrophobic protein, putative / low temperature and salt responsive protein, putative
Bra011212	A01:3299573-3301925	0.0987531	0	-Inf	0.102748	0	-Inf	AT4G30700 (E=1e-276) | pentatricopeptide (PPR) repeat-containing protein
Bra011221	A01:3241244-3248183	4.38154	0	-Inf	2.07159	0	-Inf	AT4G30780 (E=4e-257) | unknown protein
Bra011228	A01:3196339-3198109	0.289829	0	-Inf	0.290206	0	-Inf	AT4G30850 (E=1e-174) HHP2 | HHP2 (HEPTAHELICAL TRANSMEMBRANE PROTEIN2); receptor
Bra011239	A01:3131129-3133262	0.0211702	0	-Inf	0.0407606	0	-Inf	AT2G24280 (E=2e-233) | serine carboxypeptidase S28 family protein
Bra011246	A01:3103028-3112105	0.0166941	0	-Inf	0.0107013	0	-Inf	AT4G31110 (E=2e-159) | kinase
Bra011255	A01:3060321-3067111	0.0503063	0	-Inf	0.0692902	0	-Inf	AT4G31250 (E=2e-284) | leucine-rich repeat transmembrane protein kinase, putative
Bra011273	A01:2988420-2989763	2.53329	0	-Inf	4.87576	0	-Inf	AT2G20620 (E=1e-057) | unknown protein
Bra011281	A01:2955610-2957644	0.947806	0	-Inf	0.675269	0	-Inf	AT4G31540 (E=2e-269) ATEXO70G1 | ATEXO70G1 (exocyst subunit EXO70 family protein G1); protein binding
Bra011303	A01:2853689-2854328	0.277548	0	-Inf	0.219005	0	-Inf	AT4G31840 (E=3e-062) | plastocyanin-like domain-containing protein
Bra011315	A01:2759912-2760524	55.8373	0	-Inf	37.2568	0	-Inf	AT4G32020 (E=6e-033) | unknown protein
Bra011347	A01:2632588-2634907	0.307325	0	-Inf	0.52208	0	-Inf	AT4G32430 (E=0.0) | pentatricopeptide (PPR) repeat-containing protein
Bra011351	A01:2608611-2612456	0.0326384	0	-Inf	0.0139263	0	-Inf	AT4G32500 (E=0.0) AKT5 | AKT5; cyclic nucleotide binding / inward rectifier potassium channel
Bra011373	A01:2486034-2486715	0.159334	0	-Inf	0.0413753	0	-Inf	None
Bra011383	A01:2430971-2431661	0.561023	0	-Inf	0.242716	0	-Inf	AT4G32800 (E=6e-074) | AP2 domain-containing transcription factor TINY, putative
Bra011386	A01:2405195-2407006	0.2134	0	-Inf	0.0275503	0	-Inf	AT4G32830 (E=1e-159) AtAUR1 | AtAUR1 (ATAURORA1); histone kinase(H3-S10 specific) / kinase/ protein serine/threonine kinase
Bra011391	A01:2382004-2382496	5.29813	0	-Inf	6.50899	0	-Inf	AT4G32870 (E=4e-068) | unknown protein
Bra011406	A01:2310358-2311986	0.0520388	0	-Inf	0.17877	0	-Inf	AT4G33020 (E=2e-145) ZIP9, ATZIP9 | ZIP9; cation transmembrane transporter/ metal ion transmembrane transporter
Bra011424	A01:2237018-2241388	0.0399492	0	-Inf	0.0124608	0	-Inf	AT4G33170 (E=0.0) | pentatricopeptide (PPR) repeat-containing protein
Bra011447	A01:2133089-2134157	0.77876	0	-Inf	0.647532	0	-Inf	AT4G33495 (E=8e-187) RPD1 | RPD1 (ROOT PRIMORDIUM DEFECTIVE 1); ubiquitin thiolesterase
Bra011460	A01:2085843-2086092	144.996	0	-Inf	56.4597	0	-Inf	AT4G33666 (E=2e-010) | unknown protein
Bra011470	A01:2043323-2048368	2.70572	0	-Inf	0.056026	0	-Inf	AT4G33790 (E=3e-218) CER4, G7, FAR3 | CER4 (ECERIFERUM 4); fatty acyl-CoA reductase (alcohol-forming)/ oxidoreductase, acting on the CH-CH group of donors
Bra011475	A01:2032182-2033673	0.0690366	0	-Inf	0.0355069	0	-Inf	AT4G33870 (E=2e-096) | peroxidase, putative
Bra011481	A01:2005946-2008036	0.379277	0	-Inf	0.325465	0	-Inf	AT4G33950 (E=3e-191) OST1, SNRK2-6, SRK2E, SNRK2.6, P44 | OST1 (OPEN STOMATA 1); calcium-dependent protein serine/threonine kinase/ kinase/ protein kinase
Bra011483	A01:1996204-1998289	0.0708486	0	-Inf	0.145232	0	-Inf	AT4G33970 (E=8e-209) | protein binding / structural constituent of cell wall
Bra011510	A01:1880959-1882770	0.0161016	0	-Inf	0.248748	0	-Inf	AT4G34230 (E=2e-159) CAD5, ATCAD5, CAD-5 | ATCAD5 (CINNAMYL ALCOHOL DEHYDROGENASE 5); cinnamyl-alcohol dehydrogenase
Bra011519	A01:1846386-1847213	19.7524	0	-Inf	33.9355	0	-Inf	AT4G34290 (E=2e-051) | SWIB complex BAF60b domain-containing protein
Bra011521	A01:1839606-1840647	1.34396	0	-Inf	1.75248	0	-Inf	AT4G34340 (E=3e-108) TAF8 | TAF8 (TBP-ASSOCIATED FACTOR 8); DNA binding
Bra011523	A01:1833799-1835518	2.29663	0	-Inf	2.87392	0	-Inf	AT4G34360 (E=6e-127) | protease-related
Bra011529	A01:1811540-1812329	0.0753312	0	-Inf	0.032484	0	-Inf	AT4G34410 (E=7e-075) RRTF1 | RRTF1 ({REDOX RESPONSIVE TRANSCRIPTION FACTOR 1); DNA binding / transcription factor
Bra011542	A01:1757968-1758601	3.36616	0	-Inf	0.346508	0	-Inf	AT4G34560 (E=1e-062) | unknown protein
Bra011547	A01:1728616-1729855	7.69303	0	-Inf	12.1509	0	-Inf	AT4G34630 (E=2e-016) | unknown protein
Bra011555	A01:1698881-1704489	0.051654	0	-Inf	0.0283665	0	-Inf	AT4G34710 (E=2e-295) ADC2, SPE2, ATADC2 | ADC2 (ARGININE DECARBOXYLASE 2); arginine decarboxylase
Bra011559	A01:1686935-1687367	1.25615	0	-Inf	2.12352	0	-Inf	AT4G34750 (E=4e-062) | auxin-responsive protein, putative / small auxin up RNA (SAUR_E)
Bra011582	A01:1564612-1565353	5.52835	0	-Inf	14.1504	0	-Inf	AT4G35070 (E=1e-042) | FUNCTIONS IN: molecular_function unknown; INVOLVED IN: biological_process unknown; LOCATED IN: cellular_component unknown; EXPRESSED IN: 11 plant structures; EXPRESSED DURING: 8 growth stages; BEST Arabidopsis thaliana protein match is: SBP1 (s-ribonuclease binding protein 1); protein binding / zinc ion binding (TAIR:AT1G45976.1); Has 495 Blast hits to 488 proteins in 78 sp…
Bra011588	A01:1530731-1533143	0.575846	0	-Inf	0.829502	0	-Inf	AT4G35130 (E=0.0) | pentatricopeptide (PPR) repeat-containing protein
Bra011597	A01:1486673-1489387	1.53625	0	-Inf	1.52646	0	-Inf	AT4G35240 (E=1e-178) | unknown protein
Bra011608	A01:1430660-1431947	0.808133	0	-Inf	0.416165	0	-Inf	AT4G35350 (E=6e-185) XCP1 | XCP1 (XYLEM CYSTEINE PEPTIDASE 1); cysteine-type endopeptidase/ cysteine-type peptidase
Bra011611	A01:1418318-1424912	0.0929883	0	-Inf	0.190166	0	-Inf	AT4G35380 (E=0.0) | guanine nucleotide exchange family protein
Bra011618	A01:1386853-1387435	4.18763	0	-Inf	4.97089	0	-Inf	AT2G17450 (E=8e-050) RHA3A | RHA3A; protein binding / zinc ion binding
Bra011621	A01:1372692-1374007	0.376955	0	-Inf	0.328064	0	-Inf	AT4G35530 (E=1e-084) | phosphatidylinositolglycan-related
Bra011650	A01:1252221-1253552	1.06214	0	-Inf	4.89103	0	-Inf	AT4G35940 (E=2e-054) | unknown protein
Bra011662	A01:1200660-1200975	0.56448	0	-Inf	2.38474	0	-Inf	AT4G36110 (E=8e-050) | auxin-responsive protein, putative
Bra011668	A01:1153796-1157666	0.181643	0	-Inf	0.126736	0	-Inf	AT4G36180 (E=0.0) | leucine-rich repeat family protein
Bra011687	A01:1056548-1056917	2.79274	0	-Inf	3.81572	0	-Inf	AT4G36500 (E=8e-057) | unknown protein
Bra011689	A01:1043387-1044861	39.4028	0	-Inf	28.4672	0	-Inf	AT4G36530 (E=1e-175) | hydrolase, alpha/beta fold family protein
Bra011692	A01:1025689-1028286	0.277627	0	-Inf	0.635322	0	-Inf	AT2G18330 (E=1e-240) | AAA-type ATPase family protein
Bra011700	A01:979767-982914	0.867235	0	-Inf	1.357	0	-Inf	AT4G36710 (E=5e-216) | transcription factor
Bra011715	A01:911430-911958	1.54473	0	-Inf	0.472989	0	-Inf	AT4G37240 (E=8e-043) | unknown protein
Bra011721	A01:875240-881972	0.179309	0	-Inf	0.154553	0	-Inf	AT4G37170 (E=0.0) | pentatricopeptide (PPR) repeat-containing protein
Bra011726	A01:860406-862947	0.305436	0	-Inf	0.275162	0	-Inf	AT2G23520 (E=1e-291) | catalytic/ pyridoxal phosphate binding
Bra011735	A01:827941-828942	11.0574	0	-Inf	15.2524	0	-Inf	AT4G36990 (E=4e-093) HSF4, HSFB1, AT-HSFB1, ATHSF4 | HSF4 (HEAT SHOCK FACTOR 4); DNA binding / transcription factor/ transcription repressor
Bra011745	A01:766377-768571	2.16288	0	-Inf	2.28712	0	-Inf	AT4G36890 (E=5e-184) IRX14 | IRX14 (irregular xylem 14); transferase, transferring glycosyl groups / xylosyltransferase
Bra011747	A01:758417-760797	0.114752	0	-Inf	0.0326582	0	-Inf	AT4G37250 (E=2e-308) | leucine-rich repeat family protein / protein kinase family protein
Bra011756	A01:716647-719989	0.0399595	0	-Inf	0.0128187	0	-Inf	AT4G37330 (E=1e-206) CYP81D4 | CYP81D4; electron carrier/ heme binding / iron ion binding / monooxygenase/ oxygen binding
Bra011761	A01:689018-690694	0.378247	0	-Inf	0.984467	0	-Inf	AT4G37430 (E=5e-244) CYP91A2, CYP81F1 | CYP91A2 (CYTOCHROME P450 MONOOXYGENASE 91A2); electron carrier/ heme binding / iron ion binding / monooxygenase/ oxygen binding
Bra011767	A01:664333-665011	0.795069	0	-Inf	0.130291	0	-Inf	None
Bra011782	A01:568505-570905	0.216574	0	-Inf	0.012079	0	-Inf	AT4G37750 (E=1e-237) ANT, DRG, CKC, CKC1 | ANT (AINTEGUMENTA); DNA binding / transcription factor
Bra011798	A01:458095-461310	0.189639	0	-Inf	0.284782	0	-Inf	AT4G37970 (E=1e-170) ATCAD6, CAD6 | CAD6 (CINNAMYL ALCOHOL DEHYDROGENASE 6); binding / catalytic/ oxidoreductase/ zinc ion binding
Bra011800	A01:446167-446896	0.028463	0	-Inf	0.368879	0	-Inf	AT4G38000 (E=8e-078) | Dof-type zinc finger domain-containing protein
Bra011801	A01:444034-445209	1.14485	0	-Inf	3.50837	0	-Inf	AT4G38020 (E=2e-166) | tRNA/rRNA methyltransferase (SpoU) family protein
Bra011803	A01:436397-437969	3.28283	0	-Inf	1.84514	0	-Inf	AT4G38040 (E=7e-201) | exostosin family protein
Bra011804	A01:433125-436131	0.0704972	0	-Inf	0.0180636	0	-Inf	AT4G38050 (E=7e-295) | transmembrane transporter
Bra011807	A01:425667-426832	2.40616	0	-Inf	3.44861	0	-Inf	AT4G40080 (E=1e-159) | epsin N-terminal homology (ENTH) domain-containing protein / clathrin assembly protein-related
Bra011808	A01:420772-421900	21.7391	0	-Inf	22.792	0	-Inf	AT4G40060 (E=1e-129) ATHB16, ATHB-16 | ATHB16 (ARABIDOPSIS THALIANA HOMEOBOX PROTEIN 16); sequence-specific DNA binding / transcription activator/ transcription factor
Bra011814	A01:403097-404762	0.276982	0	-Inf	0.757913	0	-Inf	AT4G40020 (E=1e-112) | unknown protein
Bra011820	A01:376946-382259	15.081	0	-Inf	11.7723	0	-Inf	AT4G39960 (E=1e-208) | DNAJ heat shock family protein
Bra011828	A01:345527-346910	0.996947	0	-Inf	0.640177	0	-Inf	AT4G39840 (E=3e-142) | unknown protein
Bra011831	A01:328552-329214	0.176583	0	-Inf	4.14662	0	-Inf	AT4G39795 (E=6e-037) | senescence-associated protein-related
Bra011838	A01:282248-283121	0.237114	0	-Inf	0.0556643	0	-Inf	AT4G39720 (E=1e-090) | VQ motif-containing protein
Bra011855	A01:217460-218210	1.30523	0	-Inf	2.60605	0	-Inf	AT4G39590 (E=1e-061) | kelch repeat-containing F-box family protein
Bra011856	A01:216184-216760	0.258933	0	-Inf	0.169129	0	-Inf	AT4G39550 (E=8e-053) | kelch repeat-containing F-box family protein
Bra011859	A01:207462-208974	0.186822	0	-Inf	0.133208	0	-Inf	AT4G39510 (E=6e-227) CYP96A12 | CYP96A12; electron carrier/ heme binding / iron ion binding / monooxygenase/ oxygen binding
Bra011862	A01:170646-174231	4.27604	0	-Inf	3.31603	0	-Inf	AT4G39400 (E=0.0) BRI1, CBB2, DWF2, BIN1, ATBRI1 | BRI1 (BRASSINOSTEROID INSENSITIVE 1); kinase/ protein binding / protein heterodimerization/ protein homodimerization/ protein kinase/ protein serine/threonine kinase
Bra011865	A01:150168-154808	0.746943	0	-Inf	0.08889	0	-Inf	AT4G39350 (E=0.0) CESA2, ATH-A, ATCESA2 | CESA2 (CELLULOSE SYNTHASE A2); cellulose synthase/ transferase, transferring glycosyl groups
Bra011879	A01:108401-111063	0.0290447	0	-Inf	0.0753072	0	-Inf	AT4G39070 (E=4e-092) | zinc finger (B-box type) family protein
Bra011885	A01:78911-82518	0.310284	0	-Inf	0.350574	0	-Inf	AT4G38950 (E=2e-159) | kinesin motor family protein
Bra011891	A01:57356-57653	63.3558	0	-Inf	40.3613	0	-Inf	AT4G38840 (E=4e-039) | auxin-responsive protein, putative
Bra011896	A01:32527-34575	1.51364	0	-Inf	1.90387	0	-Inf	AT4G38670 (E=1e-125) | pathogenesis-related thaumatin family protein
Bra011906	A07:11432064-11444031	0.437479	0	-Inf	2.11106	0	-Inf	None
Bra011922	A07:11317545-11317962	2.78203	0	-Inf	2.73473	0	-Inf	AT2G28870 (E=5e-027) | unknown protein
Bra011929	A07:11252697-11253009	50.1387	0	-Inf	98.7713	0	-Inf	AT5G59690 (E=2e-040) | histone H4
Bra011951	A07:11038911-11039259	6.00381	0	-Inf	0.487838	0	-Inf	AT2G28410 (E=6e-040) | unknown protein
Bra011953	A07:11011853-11015044	3.30821	0	-Inf	2.81646	0	-Inf	AT2G28380 (E=6e-156) DRB2 | DRB2 (DSRNA-BINDING PROTEIN 2); double-stranded RNA binding
Bra011957	A07:10958292-10958688	5.44803	0	-Inf	10.152	0	-Inf	AT2G28330 (E=7e-015) | unknown protein
Bra011976	A07:10821238-10822957	0.151068	0	-Inf	0.216524	0	-Inf	AT2G28120 (E=6e-299) | nodulin family protein
Bra011993	A07:10695742-10700411	0.692881	0	-Inf	0.424598	0	-Inf	AT2G27880 (E=0.0) AGO5 | AGO5 (ARGONAUTE 5); nucleic acid binding
Bra012006	A07:10649690-10651184	0.147459	0	-Inf	0.0675968	0	-Inf	AT2G27690 (E=2e-238) CYP94C1 | CYP94C1; fatty acid (omega-1)-hydroxylase/ oxygen binding
Bra012007	A07:10643758-10646799	0.228326	0	-Inf	0.339611	0	-Inf	AT4G36480 (E=4e-094) ATLCB1, LCB1, EMB2779, FBR11 | ATLCB1 (LONG-CHAIN BASE1); protein binding / serine C-palmitoyltransferase
Bra012013	A07:10605662-10606121	3.56192	0	-Inf	5.29044	0	-Inf	AT2G27510 (E=7e-068) ATFD3 | ATFD3 (ferredoxin 3); 2 iron, 2 sulfur cluster binding / electron carrier/ iron-sulfur cluster binding
Bra012024	A07:10553753-10555076	0.286721	0	-Inf	0.130331	0	-Inf	AT2G27300 (E=2e-152) ANAC040, NTL8 | NTL8 (NTM1-LIKE 8); transcription factor
Bra012026	A07:10543478-10544192	4.47578	0	-Inf	6.37639	0	-Inf	AT2G27260 (E=4e-052) | FUNCTIONS IN: molecular_function unknown; INVOLVED IN: biological_process unknown; LOCATED IN: cellular_component unknown; EXPRESSED IN: 24 plant structures; EXPRESSED DURING: 15 growth stages; CONTAINS InterPro DOMAIN/s: Harpin-induced 1 (InterPro:IPR010847); Has 584 Blast hits to 584 proteins in 25 species: Archae - 2; Bacteria - 0; Metazoa - 2; Fungi - 0; Plants - 578; V…
Bra012032	A07:10501924-10502389	2.68883	0	-Inf	2.37433	0	-Inf	AT2G27180 (E=1e-026) | unknown protein
Bra012036	A07:10481400-10484577	0.550437	0	-Inf	0.380762	0	-Inf	AT2G27060 (E=1e-208) | ATP binding / protein binding / protein kinase/ protein serine/threonine kinase/ protein tyrosine kinase
Bra012037	A07:10469775-10470350	63.0555	0	-Inf	101.017	0	-Inf	AT3G43810 (E=3e-081) CAM7 | CAM7 (CALMODULIN 7); calcium ion binding
Bra012062	A07:10243068-10244747	0.271676	0	-Inf	0.843463	0	-Inf	AT5G66360 (E=1e-115) | ribosomal RNA adenine dimethylase family protein
Bra012071	A07:10200105-10200789	0.411195	0	-Inf	0.817027	0	-Inf	AT5G66440 (E=1e-060) | unknown protein
Bra012075	A07:10169836-10170172	17.7282	0	-Inf	45.8699	0	-Inf	AT5G66490 (E=2e-018) | unknown protein
Bra012076	A07:10167874-10169458	0.186315	0	-Inf	0.515848	0	-Inf	AT5G66500 (E=2e-231) | pentatricopeptide (PPR) repeat-containing protein
Bra012078	A07:10153473-10154760	1.34589	0	-Inf	0.358958	0	-Inf	AT5G66520 (E=3e-182) | pentatricopeptide (PPR) repeat-containing protein
Bra012082	A07:10133216-10135511	0.975736	0	-Inf	1.13663	0	-Inf	AT5G66560 (E=0.0) | phototropic-responsive NPH3 family protein
Bra012084	A07:10125014-10125437	1.51168	0	-Inf	0.951826	0	-Inf	AT5G66580 (E=2e-051) | unknown protein
Bra012090	A07:10085818-10086976	0.0291236	0	-Inf	0.168581	0	-Inf	AT5G66670 (E=4e-119) | unknown protein
Bra012094	A07:10052985-10054643	1.40835	0	-Inf	1.24274	0	-Inf	AT5G66710 (E=7e-156) | protein kinase, putative
Bra012097	A07:10045738-10047445	1.99413	0	-Inf	1.36775	0	-Inf	AT5G65650 (E=7e-083) | unknown protein
Bra012099	A07:10035164-10038867	0.163311	0	-Inf	0.10457	0	-Inf	AT5G66750 (E=0.0) DDM1, CHR01, CHR1, CHA1, SOM4, SOM1, ATDDM1 | CHR1 (CHROMATIN REMODELING 1); ATPase/ helicase
Bra012102	A07:10007810-10008317	6.41148	0	-Inf	11.2469	0	-Inf	AT5G66770 (E=6e-080) | scarecrow transcription factor family protein
Bra012105	A07:9991185-9991852	0.47488	0	-Inf	1.03933	0	-Inf	AT5G66800 (E=2e-070) | unknown protein
Bra012116	A07:9918054-9922793	1.2056	0	-Inf	1.56069	0	-Inf	AT5G66900 (E=5e-227) | disease resistance protein (CC-NBS-LRR class), putative
Bra012119	A07:9905718-9906381	0.100089	0	-Inf	0.173412	0	-Inf	AT5G66940 (E=3e-069) | Dof-type zinc finger domain-containing protein
Bra012124	A07:9888746-9891449	2.46215	0	-Inf	0.0666999	0	-Inf	None
Bra012126	A07:9880160-9881327	0.0288283	0	-Inf	0.0370795	0	-Inf	AT5G67020 (E=3e-164) | unknown protein
Bra012128	A07:9865995-9866655	0.336261	0	-Inf	0.568115	0	-Inf	AT5G67060 (E=5e-063) HEC1 | HEC1 (HECATE 1); transcription factor
Bra012131	A07:9851799-9852840	0.0839975	0	-Inf	0.432711	0	-Inf	AT5G67080 (E=6e-157) MAPKKK19 | MAPKKK19; ATP binding / kinase/ protein kinase/ protein serine/threonine kinase
Bra012133	A07:9841483-9849761	3.08057	0	-Inf	0.409765	0	-Inf	AT5G67110 (E=3e-065) ALC | ALC (ALCATRAZ); DNA binding / transcription factor
Bra012137	A07:9830930-9832268	4.5199	0	-Inf	3.26024	0	-Inf	AT5G67150 (E=2e-196) | transferase family protein
Bra012138	A07:9829197-9830511	12.6254	0	-Inf	10.6129	0	-Inf	AT5G67160 (E=2e-176) EPS1 | EPS1 (ENHANCED PSEUDOMONAS SUSCEPTIBILTY 1); transferase/ transferase, transferring acyl groups other than amino-acyl groups
Bra012143	A07:9781324-9782272	0.076548	0	-Inf	0.0246769	0	-Inf	AT5G67210 (E=3e-152) | unknown protein
Bra012145	A07:9775970-9777468	0.157166	0	-Inf	0.245048	0	-Inf	AT5G67230 (E=5e-193) | glycosyl transferase family 43 protein
Bra012146	A07:9755090-9756314	0.635159	0	-Inf	0.0419372	0	-Inf	AT5G67260 (E=6e-148) CYCD3;2 | CYCD3;2 (CYCLIN D3;2); cyclin-dependent protein kinase
Bra012173	A07:9563918-9565217	0.0501906	0	-Inf	0.0483687	0	-Inf	AT4G08580 (E=9e-077) | FUNCTIONS IN: molecular_function unknown; INVOLVED IN: biological_process unknown; LOCATED IN: chloroplast; EXPRESSED IN: male gametophyte, pollen tube; EXPRESSED DURING: L mature pollen stage, M germinated pollen stage; CONTAINS InterPro DOMAIN/s: Micro-fibrillar-associated 1, C-terminal (InterPro:IPR009730); BEST Arabidopsis thaliana protein match is: unknown protein (TAI…
Bra012182	A07:9494562-9495073	13.7962	0	-Inf	12.1145	0	-Inf	AT2G19460 (E=3e-043) | unknown protein
Bra012184	A07:9476551-9478869	0.226793	0	-Inf	0.164063	0	-Inf	AT1G19640 (E=4e-174) JMT | JMT (JASMONIC ACID CARBOXYL METHYLTRANSFERASE); jasmonate O-methyltransferase
Bra012199	A07:9343358-9343592	145.067	0	-Inf	113.514	0	-Inf	None
Bra012205	A07:9317891-9322244	0.104421	0	-Inf	0.0281407	0	-Inf	AT1G20060 (E=1e-230) | ATP binding / microtubule motor
Bra012207	A07:9313660-9314242	4.44143	0	-Inf	6.95925	0	-Inf	AT1G20070 (E=8e-051) | unknown protein
Bra012220	A07:9211809-9230878	1.86741	0	-Inf	0.289698	0	-Inf	None
Bra012225	A07:9207389-9208121	0.735131	0	-Inf	0.256477	0	-Inf	AT1G20310 (E=3e-069) | unknown protein
Bra012232	A07:9163482-9166014	0.0840042	0	-Inf	0.0119727	0	-Inf	AT1G20500 (E=4e-249) | 4-coumarate-CoA ligase
Bra012248	A07:9090308-9096690	6.48983	0	-Inf	6.81738	0	-Inf	AT1G20770 (E=6e-077) | unknown protein
Bra012251	A07:9078463-9079054	0.0410769	0	-Inf	0.696806	0	-Inf	AT1G20823 (E=1e-065) | zinc finger (C3HC4-type RING finger) family protein
Bra012252	A07:9072561-9073884	0.0164115	0	-Inf	0.190183	0	-Inf	AT1G20850 (E=3e-182) XCP2 | XCP2 (xylem cysteine peptidase 2); cysteine-type peptidase/ peptidase
Bra012256	A07:9048235-9049165	2.065	0	-Inf	6.03737	0	-Inf	AT1G20900 (E=3e-073) ESC, ORE7, AHL27 | ESC (ESCAROLA); double-stranded DNA binding
Bra012258	A07:9032971-9034479	0.0952574	0	-Inf	0.0245655	0	-Inf	AT1G20930 (E=4e-174) CDKB2;2 | CDKB2;2 (CYCLIN-DEPENDENT KINASE B2;2); cyclin-dependent protein kinase/ kinase
Bra012261	A07:9011077-9012667	0.228618	0	-Inf	0.122828	0	-Inf	AT1G20990 (E=2e-123) | DC1 domain-containing protein
Bra012264	A07:8981635-8982259	1.41136	0	-Inf	1.74101	0	-Inf	AT1G21010 (E=1e-075) | unknown protein
Bra012266	A07:8966173-8966917	0.358068	0	-Inf	0.178393	0	-Inf	AT1G21050 (E=5e-102) | unknown protein
Bra012272	A07:8915128-8917565	0.0836265	0	-Inf	0.0494323	0	-Inf	AT1G21210 (E=1e-309) WAK4 | WAK4 (wall associated kinase 4); ATP binding / calcium ion binding / protein kinase/ protein serine/threonine kinase
Bra012282	A07:8838790-8839382	111.603	0	-Inf	34.8723	0	-Inf	AT1G21500 (E=1e-022) | unknown protein
Bra012296	A07:8748695-8749433	1.89749	0	-Inf	3.79603	0	-Inf	AT1G21840 (E=4e-103) UREF | UREF (urease accessory protein F); nickel ion binding
Bra012298	A07:8722658-8723318	0.0672522	0	-Inf	0.0874023	0	-Inf	AT1G21910 (E=2e-063) | AP2 domain-containing transcription factor family protein
Bra012306	A07:8657509-8658382	1.91846	0	-Inf	0.500979	0	-Inf	AT1G22110 (E=2e-070) | structural constituent of ribosome
Bra012311	A07:8622175-8623479	0.420762	0	-Inf	0.258491	0	-Inf	AT1G22180 (E=6e-143) | SEC14 cytosolic factor family protein / phosphoglyceride transfer family protein
Bra012317	A07:8567029-8567719	0.0399232	0	-Inf	0.208249	0	-Inf	AT1G22250 (E=8e-067) | unknown protein
Bra012318	A07:8565752-8566130	31.6929	0	-Inf	93.5419	0	-Inf	AT1G22270 (E=2e-049) | unknown protein
Bra012320	A07:8557759-8559230	1.01517	0	-Inf	0.997392	0	-Inf	AT1G22310 (E=7e-066) MBD8 | MBD8; methyl-CpG binding
Bra012322	A07:8535975-8538545	0.384886	0	-Inf	0.288202	0	-Inf	AT1G22380 (E=2e-227) AtUGT85A3 | AtUGT85A3 (UDP-glucosyl transferase 85A3); glucuronosyltransferase/ transcription factor/ transferase, transferring glycosyl groups
Bra012323	A07:8531500-8533053	0.032317	0	-Inf	0.221257	0	-Inf	AT1G22400 (E=6e-228) UGT85A1, ATUGT85A1 | UGT85A1; UDP-glycosyltransferase/ cis-zeatin O-beta-D-glucosyltransferase/ glucuronosyltransferase/ trans-zeatin O-beta-D-glucosyltransferase/ transferase, transferring glycosyl groups / transferase, transferring hexosyl groups
Bra012333	A07:8425123-8428243	1.88935	0	-Inf	0.547723	0	-Inf	AT1G53120 (E=2e-028) | RNA-binding S4 domain-containing protein
Bra012345	A07:8317344-8317791	0.305242	0	-Inf	0.101463	0	-Inf	AT1G22810 (E=1e-058) | AP2 domain-containing transcription factor, putative
Bra012352	A07:8290722-8291166	3.26304	0	-Inf	5.47874	0	-Inf	AT1G22985 (E=9e-038) | AP2 domain-containing transcription factor, putative
Bra012354	A07:8271971-8272977	0.0948552	0	-Inf	0.0306542	0	-Inf	AT5G37930 (E=2e-074) | seven in absentia (SINA) family protein
Bra012356	A07:8263288-8263723	0.492873	0	-Inf	0.657268	0	-Inf	AT1G23040 (E=4e-024) | hydroxyproline-rich glycoprotein family protein
Bra012366	A07:8158290-8158920	1.16816	0	-Inf	0.237584	0	-Inf	AT1G23205 (E=2e-083) | invertase/pectin methylesterase inhibitor family protein
Bra012378	A07:8111188-8111740	0.798264	0	-Inf	0.307343	0	-Inf	AT1G23530 (E=1e-046) | unknown protein
Bra012390	A07:8045272-8046400	0.55784	0	-Inf	0.659563	0	-Inf	AT1G23840 (E=7e-072) | unknown protein
Bra012427	A07:7743098-7747908	0.00943496	0	-Inf	0.0060363	0	-Inf	AT1G27100 (E=9e-132) | FUNCTIONS IN: molecular_function unknown; INVOLVED IN: biological_process unknown; LOCATED IN: vacuole; EXPRESSED IN: 23 plant structures; EXPRESSED DURING: 13 growth stages; CONTAINS InterPro DOMAIN/s: Protein of unknown function DUF569 (InterPro:IPR007679), Actin_cross-linking (InterPro:IPR008999); BEST Arabidopsis thaliana protein match is: unknown protein (TAIR:AT1G6990…
Bra012433	A07:7679573-7681258	2.68196	0	-Inf	0.782732	0	-Inf	AT1G27030 (E=2e-160) | unknown protein
Bra012445	A07:7548962-7553339	0.0142407	0	-Inf	0.00912263	0	-Inf	AT1G26680 (E=7e-069) | transcriptional factor B3 family protein
Bra012458	A07:7498575-7499808	0.0410769	0	-Inf	0.107201	0	-Inf	AT1G26450 (E=7e-044) | beta-1,3-glucanase-related
Bra012471	A07:7369149-7370778	0.126039	0	-Inf	0.139223	0	-Inf	AT1G25550 (E=4e-085) | myb family transcription factor
Bra012476	A07:7327863-7328133	2.77528	0	-Inf	2.99174	0	-Inf	AT1G25425 (E=7e-033) CLE43 | CLE43 (CLAVATA3/ESR-RELATED 43)
Bra012479	A07:7308155-7309022	1.78563	0	-Inf	1.26539	0	-Inf	AT1G25400 (E=8e-086) | unknown protein
Bra012480	A07:7297660-7299758	0.16805	0	-Inf	0.0102575	0	-Inf	AT1G25390 (E=1e-274) | protein kinase family protein
Bra012510	A07:7108042-7108765	0.836598	0	-Inf	0.112185	0	-Inf	AT1G24480 (E=4e-114) | methyltransferase
Bra012526	A03:23793578-23796907	0.0397978	0	-Inf	0.00849596	0	-Inf	AT4G19960 (E=1e-139) | potassium ion transmembrane transporter
Bra012552	A03:23590399-23593282	0.0408592	0	-Inf	0.0392195	0	-Inf	AT4G19220 (E=7e-194) | pentatricopeptide (PPR) repeat-containing protein
Bra012570	A03:23486588-23488479	2.78373	0	-Inf	2.03855	0	-Inf	AT4G18890 (E=5e-117) | brassinosteroid signalling positive regulator-related
Bra012571	A03:23480790-23482034	5.98464	0	-Inf	7.93655	0	-Inf	AT4G18880 (E=7e-152) AT-HSFA4A, HSF A4A | AT-HSFA4A; DNA binding / transcription factor
Bra012575	A03:23458837-23460120	1.01298	0	-Inf	1.52082	0	-Inf	AT4G18830 (E=4e-110) ATOFP5, OFP5 | OFP5 (ARABIDOPSIS THALIANA OVATE FAMILY PROTEIN 5)
Bra012578	A03:23439100-23442994	0.0191024	0	-Inf	0.0122217	0	-Inf	AT4G18780 (E=0.0) CESA8, IRX1, ATCESA8, LEW2 | IRX1 (IRREGULAR XYLEM 1); cellulose synthase/ transferase, transferring glycosyl groups
Bra012581	A03:23432613-23434115	8.18546	0	-Inf	4.43878	0	-Inf	AT4G18710 (E=6e-220) BIN2, DWF12, UCU1, ATSK21, SK21 | BIN2 (BRASSINOSTEROID-INSENSITIVE 2); glycogen synthase kinase 3/ kinase/ protein kinase
Bra012605	A03:23250796-23251198	0.207597	0	-Inf	1.81798	0	-Inf	AT4G18280 (E=3e-008) | glycine-rich cell wall protein-related
Bra012609	A03:23234573-23238055	0.0885247	0	-Inf	0.753058	0	-Inf	AT4G18250 (E=6e-232) | receptor serine/threonine kinase, putative
Bra012621	A03:23169808-23174954	0.21045	0	-Inf	0.467448	0	-Inf	AT5G46540 (E=0.0) PGP7 | PGP7 (P-GLYCOPROTEIN 7); ATPase, coupled to transmembrane movement of substances
Bra012638	A03:23012620-23013223	4.35081	0	-Inf	1.39236	0	-Inf	AT4G17810 (E=7e-076) | nucleic acid binding / transcription factor/ zinc ion binding
Bra012654	A03:22899420-22901361	0.469635	0	-Inf	0.907761	0	-Inf	AT4G17616 (E=4e-292) | FUNCTIONS IN: molecular_function unknown; INVOLVED IN: biological_process unknown; LOCATED IN: cellular_component unknown; CONTAINS InterPro DOMAIN/s: Pentatricopeptide repeat (InterPro:IPR002885); BEST Arabidopsis thaliana protein match is: pentatricopeptide (PPR) repeat-containing protein (TAIR:AT1G03100.1); Has 497 Blast hits to 452 proteins in 24 species: Archae - 0; Ba…
Bra012656	A03:22890399-22892342	0.0651954	0	-Inf	0.0846821	0	-Inf	AT5G47110 (E=4e-057) | lil3 protein, putative
Bra012665	A03:22853995-22855161	3.39987	0	-Inf	2.10055	0	-Inf	AT5G47390 (E=6e-046) | myb family transcription factor
Bra012669	A03:22696860-22847068	0.414601	0	-Inf	0.120348	0	-Inf	AT4G17350 (E=3e-148) | phosphoinositide binding
Bra012672	A03:22696860-22847068	0.0984231	0	-Inf	2.15986	0	-Inf	AT4G17250 (E=0.0) | unknown protein
Bra012673	A03:22696860-22847068	1.22097	0	-Inf	1.17625	0	-Inf	AT4G17215 (E=3e-051) | unknown protein
Bra012688	A03:22696860-22847068	0.30948	0	-Inf	0.187432	0	-Inf	AT4G16890 (E=8e-304) SNC1, BAL | SNC1 (SUPPRESSOR OF NPR1-1, CONSTITUTIVE 1); nucleotide binding
Bra012690	A03:22696860-22847068	0.0918465	0	-Inf	0.235735	0	-Inf	AT4G16820 (E=4e-236) | lipase class 3 family protein
Bra012699	A03:22673671-22674766	1.19221	0	-Inf	5.83509	0	-Inf	AT4G16640 (E=1e-156) | matrix metalloproteinase, putative
Bra012701	A03:22662202-22662847	0.070013	0	-Inf	0.273175	0	-Inf	AT4G16610 (E=7e-040) | zinc finger (C2H2 type) family protein
Bra012711	A03:22606685-22606931	3.87601	0	-Inf	1.85953	0	-Inf	AT4G16515 (E=5e-026) | unknown protein
Bra012716	A03:22576985-22577399	71.7561	0	-Inf	98.1051	0	-Inf	AT4G16450 (E=2e-051) | unknown protein
Bra012717	A03:22575230-22575608	0.255588	0	-Inf	0.521609	0	-Inf	AT4G16447 (E=1e-032) | unknown protein
Bra012721	A03:22562863-22565255	4.60542	0	-Inf	5.31801	0	-Inf	AT4G16420 (E=6e-199) ADA2B, PRZ1 | ADA2B (HOMOLOG OF YEAST ADA2 2B); DNA binding / transcription coactivator/ transcription factor
Bra012725	A03:22553200-22554323	6.76713	0	-Inf	8.08321	0	-Inf	AT4G16360 (E=2e-128) | AMP-activated protein kinase
Bra012731	A03:22529731-22530690	14.9794	0	-Inf	16.8028	0	-Inf	AT4G16210 (E=1e-134) ECHIA, E-COAH-2 | ECHIA (ENOYL-COA HYDRATASE/ISOMERASE A); catalytic
Bra012743	A03:22487066-22490221	0.477723	0	-Inf	0.142193	0	-Inf	AT4G16110 (E=6e-132) ARR2 | ARR2 (ARABIDOPSIS RESPONSE REGULATOR 2); transcription factor/ two-component response regulator
Bra012748	A03:22450058-22450475	3.06023	0	-Inf	0.248612	0	-Inf	AT4G15990 (E=5e-051) | unknown protein
Bra012757	A03:22397478-22399700	0.0589999	0	-Inf	0.126836	0	-Inf	AT3G47360 (E=5e-110) AtHSD3 | AtHSD3 (hydroxysteroid dehydrogenase 3); binding / catalytic/ oxidoreductase
Bra012759	A03:22389559-22390323	4.27463	0	-Inf	2.33534	0	-Inf	None
Bra012760	A03:22385178-22385806	108.604	0	-Inf	83.1715	0	-Inf	None
Bra012765	A03:22367581-22368145	3.14832	0	-Inf	12.9388	0	-Inf	AT4G15770 (E=1e-099) | RNA binding / protein binding
Bra012772	A03:22351053-22352892	0.0574177	0	-Inf	0.0630912	0	-Inf	AT4G15720 (E=1e-283) | pentatricopeptide (PPR) repeat-containing protein
Bra012775	A03:22339594-22340823	2.26703	0	-Inf	0.284831	0	-Inf	AT4G15630 (E=7e-088) | integral membrane family protein
Bra012784	A03:22286910-22288383	1.90783	0	-Inf	0.261414	0	-Inf	AT4G15480 (E=4e-246) UGT84A1 | UGT84A1; UDP-glycosyltransferase/ sinapate 1-glucosyltransferase/ transferase, transferring glycosyl groups
Bra012789	A03:22253760-22255293	1.31158	0	-Inf	0.976251	0	-Inf	AT4G15417 (E=2e-084) ATRTL1 | ATRTL1 (ARABIDOPSIS THALIANA RNASEIII-LIKE 1); RNA binding / ribonuclease III
Bra012790	A03:22248091-22249634	7.2315	0	-Inf	5.54498	0	-Inf	AT4G15415 (E=2e-229) ATB' GAMMA | ATB' GAMMA; poly(U) binding / protein phosphatase type 2A regulator
Bra012797	A03:22186667-22193738	0.0300069	0	-Inf	0.0468934	0	-Inf	AT4G15215 (E=0.0) PDR13, ATPDR13 | PDR13; ATP binding / ATPase/ nucleoside-triphosphatase/ nucleotide binding
Bra012799	A03:22173821-22175240	0.179618	0	-Inf	0.288292	0	-Inf	AT3G52500 (E=2e-221) | aspartyl protease family protein
Bra012828	A03:22042109-22047854	0.0964648	0	-Inf	1.40315	0	-Inf	AT3G51910 (E=3e-099) AT-HSFA7A, HSFA7A | AT-HSFA7A; DNA binding / transcription factor
Bra012830	A03:22037699-22037927	4.42985	0	-Inf	3.17997	0	-Inf	None
Bra012838	A03:21978533-21981530	0.364811	0	-Inf	0.078913	0	-Inf	AT3G51770 (E=0.0) ETO1 | ETO1 (ETHYLENE OVERPRODUCER 1); protein binding, bridging
Bra012872	A03:21832946-21833870	2.93229	0	-Inf	1.77503	0	-Inf	AT3G51030 (E=1e-057) ATTRX1, ATTRX H1 | ATTRX1; oxidoreductase, acting on sulfur group of donors, disulfide as acceptor
Bra012886	A03:21734760-21735378	0.0689443	0	-Inf	0.273961	0	-Inf	AT3G50810 (E=5e-038) | unknown protein
Bra012887	A03:21731332-21731803	1.13546	0	-Inf	0.176739	0	-Inf	AT3G50800 (E=3e-053) | unknown protein
Bra012894	A03:21676691-21677580	1.1745	0	-Inf	0.185216	0	-Inf	AT3G50630 (E=2e-063) KRP2, ICK2 | KRP2 (KIP-RELATED PROTEIN 2); cyclin-dependent protein kinase inhibitor/ kinase inhibitor/ protein binding
Bra012895	A03:21655622-21656762	0.513702	0	-Inf	0.331317	0	-Inf	AT3G50620 (E=4e-155) | nodulation protein-related
Bra012896	A03:21650497-21654247	0.206176	0	-Inf	0.10643	0	-Inf	AT3G50520 (E=1e-112) | phosphoglycerate/bisphosphoglycerate mutase family protein
Bra012898	A03:21646226-21647384	0.610204	0	-Inf	0.0993719	0	-Inf	AT3G50470 (E=1e-066) HR3, MLA10 | HR3 (HOMOLOG OF RPW8 3)
Bra012900	A03:21630674-21632816	0.412081	0	-Inf	0.0841157	0	-Inf	AT3G50420 (E=0.0) | pentatricopeptide (PPR) repeat-containing protein
Bra012909	A03:21582886-21584117	0.0542458	0	-Inf	0.0466064	0	-Inf	AT3G50070 (E=3e-115) CYCD3;3 | CYCD3;3 (CYCLIN D3;3); cyclin-dependent protein kinase
Bra012910	A03:21573455-21574337	2.54805	0	-Inf	5.53714	0	-Inf	AT3G50060 (E=2e-104) MYB77 | MYB77; DNA binding / transcription factor
Bra012913	A03:21540948-21541767	1.94849	0	-Inf	0.222838	0	-Inf	AT3G49940 (E=4e-096) LBD38 | LBD38 (LOB DOMAIN-CONTAINING PROTEIN 38)
Bra012914	A03:21533366-21534008	0.141185	0	-Inf	0.27548	0	-Inf	AT3G49930 (E=4e-066) | zinc finger (C2H2 type) family protein
Bra012920	A03:21506431-21508615	0.295528	0	-Inf	0.447378	0	-Inf	AT3G49740 (E=2e-306) | pentatricopeptide (PPR) repeat-containing protein
Bra012923	A03:21498043-21500253	0.0302825	0	-Inf	0.0392845	0	-Inf	AT5G44340 (E=6e-072) TUB4 | TUB4; structural constituent of cytoskeleton
Bra012937	A03:21423106-21424623	0.0672522	0	-Inf	0.0437012	0	-Inf	AT5G61610 (E=2e-034) | INVOLVED IN: lipid storage; LOCATED IN: monolayer-surrounded lipid storage body, endomembrane system, integral to membrane, membrane; CONTAINS InterPro DOMAIN/s: Oleosin (InterPro:IPR000136); Has 6250 Blast hits to 2851 proteins in 405 species: Archae - 6; Bacteria - 1198; Metazoa - 1427; Fungi - 369; Plants - 513; Viruses - 103; Other Eukaryotes - 2634 (source: NCBI BLink).
Bra012949	A03:21367149-21367747	1.35474	0	-Inf	4.80563	0	-Inf	AT1G54050 (E=6e-046) | 17.4 kDa class III heat shock protein (HSP17.4-CIII)
Bra012952	A03:21353094-21356351	0.636918	0	-Inf	0.0649582	0	-Inf	AT5G61480 (E=1e-255) | leucine-rich repeat transmembrane protein kinase, putative
Bra012955	A03:21343808-21346255	0.0252388	0	-Inf	0.0215723	0	-Inf	AT3G29410 (E=7e-189) | terpene synthase/cyclase family protein
Bra012967	A03:21275866-21276841	0.349485	0	-Inf	0.071128	0	-Inf	AT5G61340 (E=4e-096) | unknown protein
Bra012970	A03:21267510-21270229	0.420601	0	-Inf	0.138932	0	-Inf	AT5G61290 (E=2e-210) | flavin-containing monooxygenase family protein / FMO family protein
Bra012974	A03:21241636-21244192	0.503509	0	-Inf	1.12122	0	-Inf	AT5G61250 (E=3e-278) AtGUS1 | AtGUS1 (Arabidopsis thaliana glucuronidase 1); beta-glucuronidase
Bra012980	A03:21224232-21225047	14.5713	0	-Inf	28.3882	0	-Inf	AT5G61170 (E=2e-078) | 40S ribosomal protein S19 (RPS19C)
Bra012986	A03:21199857-21203635	10.5118	0	-Inf	14.7418	0	-Inf	AT5G61030 (E=7e-048) GR-RBP3 | GR-RBP3 (glycine-rich RNA-binding protein 3); ATP binding / RNA binding
Bra012992	A03:21162779-21164327	3.80182	0	-Inf	5.2798	0	-Inf	AT5G60960 (E=1e-232) | pentatricopeptide (PPR) repeat-containing protein
Bra012997	A03:21138362-21141078	0.171926	0	-Inf	0.111419	0	-Inf	AT5G60910 (E=2e-114) AGL8, FUL | AGL8 (agamous-like 8); transcription factor
Bra013001	A03:21096573-21097697	0.0254097	0	-Inf	0.0328765	0	-Inf	AT5G60880 (E=2e-070) | unknown protein
Bra013006	A03:21073474-21074728	2.13972	0	-Inf	2.05847	0	-Inf	AT5G60820 (E=2e-099) | zinc finger (C3HC4-type RING finger) family protein
Bra013016	A03:21001611-21002448	1.00971	0	-Inf	0.563388	0	-Inf	AT5G23100 (E=2e-116) | unknown protein
Bra013020	A03:20966570-20967349	8.77835	0	-Inf	14.6382	0	-Inf	AT5G23140 (E=3e-106) CLPP2, NCLPP7 | NCLPP7 (NUCLEAR-ENCODED CLP PROTEASE P7); serine-type endopeptidase
Bra013023	A03:20950848-20951880	0.39101	0	-Inf	0.481728	0	-Inf	AT5G23170 (E=8e-123) | protein kinase family protein
Bra013025	A03:20944485-20946141	1.32025	0	-Inf	3.39531	0	-Inf	AT5G23200 (E=2e-205) | unknown protein
Bra013037	A03:20868038-20877394	0.026499	0	-Inf	0.0510935	0	-Inf	AT2G16970 (E=2e-151) MEE15 | MEE15 (maternal effect embryo arrest 15); tetracycline transporter
Bra013042	A03:20825566-20828251	0.150236	0	-Inf	0.1933	0	-Inf	AT2G16900 (E=8e-153) | FUNCTIONS IN: molecular_function unknown; INVOLVED IN: biological_process unknown; LOCATED IN: plasma membrane; EXPRESSED IN: 24 plant structures; EXPRESSED DURING: 13 growth stages; CONTAINS InterPro DOMAIN/s: Phospholipase-like, arabidopsis (InterPro:IPR007942); BEST Arabidopsis thaliana protein match is: unknown protein (TAIR:AT4G35110.4); Has 353 Blast hits to 254 prote…
Bra013078	A03:20591507-20592290	0.0254097	0	-Inf	0.065753	0	-Inf	None
Bra013088	A03:20537932-20538154	822.126	0	-Inf	822.867	0	-Inf	AT2G15960 (E=3e-023) | unknown protein
Bra013100	A03:20488646-20490158	6.98505	0	-Inf	7.7527	0	-Inf	AT2G15690 (E=1e-197) | pentatricopeptide (PPR) repeat-containing protein
Bra013105	A03:20443764-20445430	0.0217646	0	-Inf	0.153676	0	-Inf	AT2G15480 (E=8e-239) UGT73B5 | UGT73B5 (UDP-glucosyl transferase 73B5); UDP-glucosyltransferase/ UDP-glycosyltransferase/ quercetin 3-O-glucosyltransferase/ transferase, transferring glycosyl groups
Bra013107	A03:20437065-20438052	0.271229	0	-Inf	0.0233032	0	-Inf	AT2G15440 (E=5e-114) | unknown protein
Bra013116	A03:20373286-20374480	1.91567	0	-Inf	1.15876	0	-Inf	None
Bra013119	A03:20355390-20357492	0.0145816	0	-Inf	0.0186838	0	-Inf	AT3G28890 (E=2e-123) AtRLP43 | AtRLP43 (Receptor Like Protein 43); kinase/ protein binding
Bra013123	A03:20334270-20334756	2.66394	0	-Inf	53.2234	0	-Inf	AT2G14580 (E=2e-067) ATPRB1 | ATPRB1
Bra013141	A03:20225423-20227322	0.766165	0	-Inf	2.96597e-05	0	-Inf	AT2G13610 (E=3e-163) | ABC transporter family protein
Bra013142	A03:20222882-20225030	0.0144758	0	-Inf	0.342639	0	-Inf	AT2G13600 (E=0.0) | pentatricopeptide (PPR) repeat-containing protein
Bra013153	A03:20158250-20159520	0.43787	0	-Inf	0.0354462	0	-Inf	AT2G12462 (E=2e-111) | unknown protein
Bra013166	A03:20097714-20100791	0.0218351	0	-Inf	0.00932587	0	-Inf	AT2G07020 (E=6e-254) | protein kinase family protein
Bra013175	A03:20043851-20044635	14.1213	0	-Inf	239.219	0	-Inf	Glycine-rich protein family [Source:TAIR;Acc:AT2G05540](projected from arabidopsis_thaliana,AT2G05540)
Bra013178	A03:20026525-20027788	5.03371	0	-Inf	6.6869	0	-Inf	AT2G05320 (E=1e-201) | beta-1,2-N-acetylglucosaminyltransferase II
Bra013181	A03:20014507-20016731	0.00967259	0	-Inf	0.0124095	0	-Inf	AT2G05160 (E=2e-248) | zinc finger (CCCH-type) family protein / RNA recognition motif (RRM)-containing protein
Bra013190	A03:19959247-19961002	0.234077	0	-Inf	0.344616	0	-Inf	AT2G04860 (E=8e-292) | pentatricopeptide (PPR) repeat-containing protein
Bra013203	A03:19893136-19894671	4.80857	0	-Inf	4.0995	0	-Inf	AT2G04530 (E=1e-165) CPZ, TRZ2 | CPZ; 3'-tRNA processing endoribonuclease
Bra013207	A03:19879497-19880754	0.667429	0	-Inf	1.81662	0	-Inf	AT1G62120 (E=9e-127) | mitochondrial transcription termination factor-related / mTERF-related
Bra013217	A03:19804374-19807889	0.422609	0	-Inf	0.0764519	0	-Inf	AT3G25500 (E=1e-250) AFH1, FH1, AHF1, ATFH1 | AFH1 (FORMIN HOMOLOGY 1); actin binding / actin filament binding / protein binding
Bra013222	A03:19778894-19781012	0.312616	0	-Inf	0.168229	0	-Inf	AT3G25260 (E=4e-226) | proton-dependent oligopeptide transport (POT) family protein
Bra013232	A03:19739503-19741285	0.110678	0	-Inf	0.0764117	0	-Inf	AT3G25100 (E=3e-297) CDC45 | CDC45 (cell division cycle 45)
Bra013235	A03:19728040-19729843	0.218305	0	-Inf	0.549005	0	-Inf	AT3G25060 (E=9e-283) | pentatricopeptide (PPR) repeat-containing protein
Bra013240	A03:19701067-19701825	0.598848	0	-Inf	0.937122	0	-Inf	AT3G24810 (E=2e-044) ICK3, KRP5 | ICK3; cyclin-dependent protein kinase inhibitor
Bra013244	A03:19668389-19669120	5.62783	0	-Inf	12.5648	0	-Inf	AT3G24730 (E=2e-058) | catalytic
Bra013252	A03:19612208-19613760	5.13708	0	-Inf	5.58677	0	-Inf	AT3G24570 (E=3e-088) | peroxisomal membrane 22 kDa family protein
Bra013253	A03:19601831-19602677	0.33875	0	-Inf	1.07948	0	-Inf	AT3G24520 (E=5e-075) AT-HSFC1, HSFC1 | AT-HSFC1; DNA binding / transcription factor
Bra013258	A01:4573588-4575895	3.82703	0	-Inf	3.38581	0	-Inf	AT4G17830 (E=9e-228) | peptidase M20/M25/M40 family protein
Bra013263	A01:4601287-4602186	3.62466	0	-Inf	1.6647	0	-Inf	AT4G17880 (E=5e-096) | basic helix-loop-helix (bHLH) family protein
Bra013267	A01:4626527-4627448	0.299139	0	-Inf	0.154361	0	-Inf	AT4G17905 (E=8e-135) ATL4H | ATL4H; protein binding / zinc ion binding
Bra013269	A01:4635327-4636187	1.83891	0	-Inf	2.79123	0	-Inf	AT4G17940 (E=3e-049) | binding
Bra013272	A01:4646549-4647722	0.40546	0	-Inf	0.385705	0	-Inf	AT4G17980 (E=6e-105) anac071 | anac071 (Arabidopsis NAC domain containing protein 71); transcription factor
Bra013276	A01:4671496-4672723	0.0945088	0	-Inf	0.0520712	0	-Inf	None
Bra013288	A01:4748501-4749907	0.110649	0	-Inf	0.110567	0	-Inf	AT4G18160 (E=8e-166) KCO6, ATTPK3, ATKCO6, TPK3 | KCO6; outward rectifier potassium channel
Bra013289	A01:4762890-4764034	0.454428	0	-Inf	0.0764578	0	-Inf	AT4G18170 (E=1e-121) WRKY28, ATWRKY28 | WRKY28; transcription factor
Bra013291	A01:4772418-4773603	0.0306962	0	-Inf	0.138257	0	-Inf	AT4G18205 (E=2e-141) | FUNCTIONS IN: molecular_function unknown; INVOLVED IN: biological_process unknown; LOCATED IN: cellular_component unknown; CONTAINS InterPro DOMAIN/s: Protein of unknown function DUF250 (InterPro:IPR004853); BEST Arabidopsis thaliana protein match is: PUP7 (PURINE PERMEASE 7); purine transmembrane transporter (TAIR:AT4G18197.1); Has 282 Blast hits to 276 proteins in 29 spec…
Bra013306	A01:4883202-4884065	3.29141	0	-Inf	3.26137	0	-Inf	AT4G18400 (E=1e-031) | unknown protein
Bra013318	A01:4946368-4950603	0.0107424	0	-Inf	0.0137504	0	-Inf	AT4G18490 (E=3e-151) | unknown protein
Bra013328	A01:5013211-5013730	0.160275	0	-Inf	0.421087	0	-Inf	AT4G18596 (E=1e-090) | pollen Ole e 1 allergen and extensin family protein
Bra013335	A01:5054817-5056363	0.735118	0	-Inf	0.30032	0	-Inf	AT4G18630 (E=1e-190) | unknown protein
Bra013339	A01:5076634-5088816	0.35221	0	-Inf	0.0328059	0	-Inf	AT4G18670 (E=4e-204) | protein binding / structural constituent of cell wall
Bra013349	A01:5124527-5125758	3.85137	0	-Inf	5.69116	0	-Inf	AT4G18800 (E=5e-115) ATHSGBP, ATRAB11B, ATRABA1D | ATRABA1D (ARABIDOPSIS RAB GTPASE HOMOLOG A1D); GTP binding
Bra013367	A01:5233988-5236109	0.296549	0	-Inf	0.169711	0	-Inf	AT4G18990 (E=3e-173) | xyloglucan:xyloglucosyl transferase, putative / xyloglucan endotransglycosylase, putative / endo-xyloglucan transferase, putative
Bra013373	A01:5263300-5264017	0.584879	0	-Inf	0.530823	0	-Inf	AT4G19060 (E=2e-063) | disease resistance protein-related
Bra013386	A01:5337663-5339740	0.138357	0	-Inf	0.0148068	0	-Inf	AT4G19230 (E=5e-253) CYP707A1 | CYP707A1; (+)-abscisic acid 8'-hydroxylase/ oxygen binding
Bra013407	A01:5479124-5479858	1.13984	0	-Inf	0.97514	0	-Inf	None
Bra013414	A01:5505621-5507343	1.03754	0	-Inf	0.739192	0	-Inf	AT4G19650 (E=8e-241) | FUNCTIONS IN: molecular_function unknown; INVOLVED IN: biological_process unknown; LOCATED IN: cellular_component unknown; CONTAINS InterPro DOMAIN/s: Mitochodrial transcription termination factor-related (InterPro:IPR003690); BEST Arabidopsis thaliana protein match is: mitochondrial transcription termination factor-related / mTERF-related (TAIR:AT5G45113.1); Has 110 Blast …
Bra013427	A01:5595813-5596536	1.15393	0	-Inf	1.23403	0	-Inf	AT2G13100 (E=5e-104) | glycerol-3-phosphate transporter, putative / glycerol 3-phosphate permease, putative
Bra013438	A01:5666158-5666779	1.3863	0	-Inf	1.85421	0	-Inf	AT4G20000 (E=2e-066) | VQ motif-containing protein
Bra013444	A01:5689807-5691643	0.468445	0	-Inf	0.221247	0	-Inf	AT4G20090 (E=2e-292) EMB1025 | EMB1025 (embryo defective 1025)
Bra013446	A01:5701797-5705285	0.0258456	0	-Inf	0.0220425	0	-Inf	AT4G20140 (E=0.0) GSO1 | GSO1 (GASSHO1); ATP binding / protein binding / protein kinase/ protein serine/threonine kinase/ protein tyrosine kinase
Bra013465	A01:5825515-5826313	11.5476	0	-Inf	19.8496	0	-Inf	AT4G20440 (E=1e-060) smB | smB (small nuclear ribonucleoprotein associated protein B)
Bra013470	A01:5842545-5843112	1.20168	0	-Inf	3.84014	0	-Inf	AT4G20780 (E=5e-066) | calcium-binding protein, putative
Bra013478	A01:5891409-5892978	0.793612	0	-Inf	0.127288	0	-Inf	AT4G20860 (E=2e-241) | FAD-binding domain-containing protein
Bra013480	A01:5903627-5904842	0.6427	0	-Inf	0.826325	0	-Inf	AT4G20880 (E=1e-020) | ethylene-responsive nuclear protein / ethylene-regulated nuclear protein (ERT2)
Bra013481	A01:5907185-5908709	1.28947	0	-Inf	4.19529	0	-Inf	AT4G20890 (E=3e-242) TUB9 | TUB9; GTP binding / GTPase/ structural molecule
Bra013482	A01:5909242-5919392	0.0647972	0	-Inf	0.0414412	0	-Inf	AT4G20910 (E=7e-303) HEN1, CRM2 | HEN1 (HUA ENHANCER 1); RNA methyltransferase
Bra013485	A01:5930206-5933484	0.280385	0	-Inf	0.121506	0	-Inf	AT4G20940 (E=0.0) | leucine-rich repeat family protein
Bra013486	A01:5936042-5937076	1.45355	0	-Inf	2.24518	0	-Inf	AT4G20970 (E=3e-065) | basic helix-loop-helix (bHLH) family protein
Bra013495	A01:5976867-5977158	2.1871	0	-Inf	0.624083	0	-Inf	AT4G21060 (E=1e-017) | galactosyltransferase family protein
Bra013501	A01:6000180-6001779	0.135724	0	-Inf	0.0124379	0	-Inf	AT4G20860 (E=4e-233) | FAD-binding domain-containing protein
Bra013503	A01:6007448-6008171	2.3944	0	-Inf	8.6756	0	-Inf	AT4G21140 (E=3e-083) | unknown protein
Bra013509	A01:6036985-6038763	0.913391	0	-Inf	0.0586577	0	-Inf	AT4G21170 (E=7e-144) | pentatricopeptide (PPR) repeat-containing protein
Bra013521	A01:6102141-6103263	1.95875	0	-Inf	2.79396	0	-Inf	AT4G21350 (E=2e-138) B80, PUB8 | PUB8 (PLANT U-BOX 8); binding / protein binding / ubiquitin-protein ligase/ zinc ion binding
Bra013527	A01:6146422-6147266	16.4878	0	-Inf	2.96409	0	-Inf	AT4G21445 (E=2e-066) | unknown protein
Bra013529	A01:6152985-6155892	0.283705	0	-Inf	0.286055	0	-Inf	AT4G21480 (E=7e-260) | carbohydrate transmembrane transporter/ sugar:hydrogen symporter
Bra013530	A01:6158833-6159511	0.513708	0	-Inf	1.41754	0	-Inf	AT4G21500 (E=4e-058) | unknown protein
Bra013539	A01:6194039-6195822	4.75963	0	-Inf	9.67546	0	-Inf	AT5G62390 (E=1e-133) ATBAG7 | ATBAG7 (ARABIDOPSIS THALIANA BCL-2-ASSOCIATED ATHANOGENE 7); calmodulin binding
Bra013549	A01:6268417-6271180	1.80786	0	-Inf	1.12724	0	-Inf	AT4G21700 (E=0.0) | unknown protein
Bra013552	A01:6291736-6292162	7.58013	0	-Inf	10.7158	0	-Inf	AT4G21740 (E=1e-028) | unknown protein
Bra013564	A01:6361073-6367561	0.017434	0	-Inf	0.00891727	0	-Inf	AT4G21820 (E=1e-247) | binding / calmodulin binding
Bra013565	A01:6368004-6368858	16.5931	0	-Inf	21.0345	0	-Inf	AT4G21860 (E=2e-079) MSRB2 | MSRB2 (methionine sulfoxide reductase B 2); peptide-methionine-(S)-S-oxide reductase
Bra013568	A01:6375947-6377843	0.0791327	0	-Inf	0.0405713	0	-Inf	AT4G21890 (E=5e-120) | unknown protein
Bra013574	A01:6414264-6414786	1.21358	0	-Inf	2.63297	0	-Inf	AT4G21930 (E=1e-047) | unknown protein
Bra013586	A01:6497444-6498523	0.161752	0	-Inf	0.0840284	0	-Inf	AT4G22110 (E=3e-110) | alcohol dehydrogenase, putative
Bra013587	A01:6501085-6504033	0.0283232	0	-Inf	0.339347	0	-Inf	AT4G22120 (E=0.0) | early-responsive to dehydration protein-related / ERD protein-related
Bra013591	A01:6526677-6530391	0.194498	0	-Inf	0.115685	0	-Inf	AT4G22130 (E=0.0) SRF8 | SRF8 (STRUBBELIG-RECEPTOR FAMILY 8); ATP binding / kinase/ protein binding / protein kinase/ protein serine/threonine kinase/ protein tyrosine kinase
Bra013594	A01:6537545-6538119	3.31771	0	-Inf	1.76989	0	-Inf	AT4G22160 (E=6e-029) | unknown protein
Bra013607	A01:6607922-6609726	0.887256	0	-Inf	1.17105	0	-Inf	AT4G22290 (E=7e-189) | ubiquitin thiolesterase
Bra013608	A01:6613354-6614368	3.74668	0	-Inf	4.25615	0	-Inf	AT4G22310 (E=2e-055) | unknown protein
Bra013627	A01:6706852-6707659	4.00181	0	-Inf	4.98637	0	-Inf	AT4G22580 (E=6e-135) | exostosin family protein
Bra013630	A01:6727189-6727672	0.942954	0	-Inf	0.497996	0	-Inf	AT4G22620 (E=5e-079) | auxin-responsive family protein
Bra013636	A01:6775327-6777746	0.107524	0	-Inf	0.0275526	0	-Inf	AT4G22730 (E=0.0) | leucine-rich repeat transmembrane protein kinase, putative
Bra013638	A01:6780524-6781739	0.0546978	0	-Inf	0.0527442	0	-Inf	None
Bra013642	A01:6805701-6807372	0.122521	0	-Inf	0.105399	0	-Inf	AT4G22750 (E=2e-120) | zinc finger (DHHC type) family protein
Bra013651	A01:6869292-6875072	0.843201	0	-Inf	0.250372	0	-Inf	AT4G22860 (E=1e-144) | unknown protein
Bra013652	A01:6875691-6877113	0.224575	0	-Inf	0.0826013	0	-Inf	AT4G22880 (E=3e-184) LDOX, TDS4, TT18, ANS | LDOX (LEUCOANTHOCYANIDIN DIOXYGENASE); leucocyanidin oxygenase
Bra013664	A01:6939353-6943055	0.0540879	0	-Inf	0.366406	0	-Inf	AT4G11860 (E=1e-076) | FUNCTIONS IN: molecular_function unknown; INVOLVED IN: biological_process unknown; LOCATED IN: cytosol, nucleus, plasma membrane; EXPRESSED IN: 25 plant structures; EXPRESSED DURING: 14 growth stages; CONTAINS InterPro DOMAIN/s: Protein of unknown function DUF544 (InterPro:IPR007518), Ubiquitin interacting motif (InterPro:IPR003903); BEST Arabidopsis thaliana protein match …
Bra013667	A01:6975642-6977328	0.882203	0	-Inf	1.84302	0	-Inf	AT4G22980 (E=1e-206) | FUNCTIONS IN: molecular_function unknown; INVOLVED IN: biological_process unknown; LOCATED IN: chloroplast; EXPRESSED IN: 13 plant structures; EXPRESSED DURING: 9 growth stages; BEST Arabidopsis thaliana protein match is: catalytic/ pyridoxal phosphate binding (TAIR:AT5G51920.1); Has 294 Blast hits to 268 proteins in 91 species: Archae - 4; Bacteria - 15; Metazoa - 79; Fung…
Bra013670	A01:6997746-7003556	0.192818	0	-Inf	0.0154808	0	-Inf	AT4G23020 (E=2e-118) | unknown protein
Bra013671	A01:7009071-7010604	0.0510254	0	-Inf	0.0916747	0	-Inf	AT4G23030 (E=6e-221) | MATE efflux protein-related
Bra013672	A01:7032970-7035946	0.0527945	0	-Inf	0.0406591	0	-Inf	AT4G23060 (E=1e-131) IQD22 | IQD22 (IQ-domain 22); calmodulin binding
Bra013694	A01:7194051-7196281	0.186315	0	-Inf	0.125816	0	-Inf	AT4G23490 (E=9e-271) | fringe-related protein
Bra013706	A01:7279698-7280868	0.172387	0	-Inf	0.110861	0	-Inf	AT4G23530 (E=4e-089) | unknown protein
Bra013715	A01:7358407-7360713	0.882591	0	-Inf	4.47827	0	-Inf	AT4G23610 (E=3e-075) | unknown protein
Bra013721	A01:7382338-7383528	0.362215	0	-Inf	0.0961297	0	-Inf	AT4G23680 (E=5e-079) | major latex protein-related / MLP-related
Bra013730	A01:7472051-7472999	0.210507	0	-Inf	0.148062	0	-Inf	AT4G11140 (E=5e-067) CRF1 | CRF1 (CYTOKININ RESPONSE FACTOR 1); DNA binding / transcription factor
Bra013737	A01:7507006-7508768	4.94522	0	-Inf	5.50377	0	-Inf	AT4G23860 (E=2e-131) | PHD finger protein-related
Bra013740	A01:7522669-7523480	2.0146	0	-Inf	34.7343	0	-Inf	AT4G23885 (E=1e-029) | unknown protein
Bra013752	A01:7593070-7593453	0.312275	0	-Inf	0.441285	0	-Inf	None
Bra013760	A01:7638249-7639295	0.304888	0	-Inf	0.424377	0	-Inf	AT4G10750 (E=2e-086) | HpcH/HpaI aldolase family protein
Bra013763	A01:7647709-7648453	0.0550873	0	-Inf	0.499501	0	-Inf	AT4G24110 (E=7e-075) | unknown protein
Bra013767	A01:7684175-7685680	0.183517	0	-Inf	0.118077	0	-Inf	AT4G24150 (E=2e-039) AtGRF8 | AtGRF8 (GROWTH-REGULATING FACTOR 8); transcription activator
Bra013776	A01:7718839-7719280	26.5852	0	-Inf	49.6213	0	-Inf	AT4G24210 (E=5e-057) SLY1 | SLY1 (SLEEPY1)
Bra013777	A01:7720208-7721460	12.499	0	-Inf	29.2235	0	-Inf	AT4G24220 (E=6e-200) VEP1, AWI31 | VEP1 (VEIN PATTERNING 1); binding / catalytic
Bra013783	A01:7736532-7737816	0.12735	0	-Inf	0.0163653	0	-Inf	AT1G30790 (E=5e-082) | F-box family protein
Bra013791	A01:7761435-7762587	0.117296	0	-Inf	0.18861	0	-Inf	AT4G24320 (E=3e-171) | ubiquitin thiolesterase
Bra013792	A01:7763764-7765226	9.24569	0	-Inf	11.7979	0	-Inf	AT4G24330 (E=1e-095) | unknown protein
Bra013797	A01:7785957-7787006	12.2529	0	-Inf	9.67714	0	-Inf	AT4G24380 (E=3e-115) | unknown protein
Bra013800	A01:7815555-7818857	0.05399	0	-Inf	0.00988489	0	-Inf	AT4G24430 (E=0.0) | lyase
Bra013812	A01:7871578-7877430	1.54754	0	-Inf	2.80861	0	-Inf	AT4G24530 (E=6e-259) | unknown protein
Bra013834	A01:8002591-8003083	0.85056	0	-Inf	1.86422	0	-Inf	AT3G63130 (E=1e-031) RANGAP1 | RANGAP1 (RAN GTPASE ACTIVATING PROTEIN 1); RAN GTPase activator/ protein binding
Bra013843	A01:8037348-8040126	2.9004	0	-Inf	1.62467	0	-Inf	AT4G24890 (E=0.0) ATPAP24, PAP24 | PAP24 (PURPLE ACID PHOSPHATASE 24); acid phosphatase/ protein serine/threonine phosphatase
Bra013867	A01:8132915-8133757	1.36174	0	-Inf	0.184406	0	-Inf	AT4G25150 (E=6e-090) | acid phosphatase, putative
Bra013872	A01:8169387-8170106	4.27085	0	-Inf	11.3406	0	-Inf	AT4G25200 (E=1e-072) ATHSP23.6-MITO | ATHSP23.6-MITO (MITOCHONDRION-LOCALIZED SMALL HEAT SHOCK PROTEIN 23.6)
Bra013873	A01:8175026-8176103	6.38433	0	-Inf	9.3959	0	-Inf	AT4G25210 (E=3e-071) | transcription regulator
Bra013892	A01:8324204-8324546	0.76159	0	-Inf	1.31941	0	-Inf	AT4G25433 (E=2e-041) | peptidoglycan-binding LysM domain-containing protein
Bra013908	A01:8398052-8399266	0.139521	0	-Inf	0.0361527	0	-Inf	AT4G25680 (E=4e-115) | unknown protein
Bra013917	A01:8435797-8436214	2.41109	0	-Inf	0.124306	0	-Inf	AT4G25760 (E=2e-037) ATGDU2, GDU2 | AtGDU2 (Arabidopsis thaliana GLUTAMINE DUMPER 2)
Bra013925	A01:8473906-8475430	0.18502	0	-Inf	0.593623	0	-Inf	AT4G25835 (E=4e-217) | AAA-type ATPase family protein
Bra013938	A01:8552419-8554410	0.0182366	0	-Inf	0.0235045	0	-Inf	AT4G25980 (E=1e-158) | cationic peroxidase, putative
Bra013944	A01:8633899-8636872	0.0139428	0	-Inf	0.107574	0	-Inf	AT4G26050 (E=3e-123) | leucine-rich repeat family protein
Bra013947	A01:8643558-8646282	0.34013	0	-Inf	0.609471	0	-Inf	AT4G26090 (E=0.0) RPS2 | RPS2 (RESISTANT TO P. SYRINGAE 2); protein binding
Bra013950	A01:8651964-8654290	3.50343	0	-Inf	5.05411	0	-Inf	AT4G26120 (E=2e-173) | ankyrin repeat family protein / BTB/POZ domain-containing protein
Bra013966	A08:4933819-4935620	0.0191282	0	-Inf	0.0736176	0	-Inf	AT5G17580 (E=6e-188) | phototropic-responsive NPH3 family protein
Bra013971	A08:4921362-4923026	2.95156	0	-Inf	1.39725	0	-Inf	AT5G17510 (E=2e-126) | unknown protein
Bra013974	A08:4909951-4911213	2.4737	0	-Inf	8.31392	0	-Inf	AT3G03341 (E=4e-029) | unknown protein
Bra013982	A08:4873970-4874991	0.0433306	0	-Inf	0.0279752	0	-Inf	AT5G17390 (E=2e-098) | universal stress protein (USP) family protein
Bra013984	A08:4868961-4869465	2.05171	0	-Inf	1.72525	0	-Inf	AT5G17360 (E=1e-057) | FUNCTIONS IN: molecular_function unknown; INVOLVED IN: biological_process unknown; LOCATED IN: cellular_component unknown; EXPRESSED IN: 9 plant structures; EXPRESSED DURING: M germinated pollen stage, 4 anthesis, F mature embryo stage, petal differentiation and expansion stage, D bilateral stage; BEST Arabidopsis thaliana protein match is: ATP dependent DNA ligase family p…
Bra013985	A08:4866763-4867318	3.34407	0	-Inf	9.36048	0	-Inf	AT5G17350 (E=2e-070) | unknown protein
Bra014004	A08:4683813-4684566	0.18914	0	-Inf	0.384895	0	-Inf	AT1G21050 (E=4e-101) | unknown protein
Bra014033	A08:4311839-4315973	0.025537	0	-Inf	0.0522927	0	-Inf	AT1G44900 (E=0.0) MCM2 | ATP binding / DNA binding / DNA-dependent ATPase
Bra014037	A08:4270327-4274307	5.84761	0	-Inf	4.5857	0	-Inf	AT1G45145 (E=1e-055) ATTRX5, ATH5, LIV1 | ATTRX5; oxidoreductase, acting on sulfur group of donors, disulfide as acceptor
Bra014049	A08:4118076-4121207	0.0257701	0	-Inf	0.0742609	0	-Inf	AT1G45545 (E=2e-260) | unknown protein
Bra014085	A08:3650604-3652005	1.2559	0	-Inf	0.285289	0	-Inf	AT1G47640 (E=7e-124) | unknown protein
Bra014098	A08:3540754-3541581	4.40962	0	-Inf	5.37303	0	-Inf	AT1G48400 (E=6e-073) | F-box family protein
Bra014105	A08:3427449-3428423	0.20848	0	-Inf	1.0947	0	-Inf	AT1G48175 (E=1e-068) emb2191 | emb2191 (embryo defective 2191); catalytic/ hydrolase/ zinc ion binding
Bra014143	A08:3120068-3121809	0.194362	0	-Inf	0.013128	0	-Inf	AT3G20100 (E=4e-185) CYP705A19 | CYP705A19; electron carrier/ heme binding / iron ion binding / monooxygenase/ oxygen binding
Bra014148	A08:3051300-3051681	0.248496	0	-Inf	1.68819	0	-Inf	AT1G48745 (E=7e-035) | unknown protein
Bra014154	A08:2994453-2994747	939.018	0	-Inf	629.845	0	-Inf	AT1G48750 (E=1e-024) | protease inhibitor/seed storage/lipid transfer protein (LTP) family protein
Bra014164	A08:2881642-2882609	0.241087	0	-Inf	0.806039	0	-Inf	AT1G48960 (E=5e-099) | universal stress protein (USP) family protein
Bra014175	A08:2788336-2789017	2.19881	0	-Inf	0.413753	0	-Inf	AT1G49210 (E=2e-097) | zinc finger (C3HC4-type RING finger) family protein
Bra014177	A08:2771498-2772116	6.91734	0	-Inf	3.20037	0	-Inf	AT1G49230 (E=1e-095) | zinc finger (C3HC4-type RING finger) family protein
Bra014178	A08:2767804-2768038	40.3984	0	-Inf	52.7972	0	-Inf	AT1G49245 (E=2e-022) | FUNCTIONS IN: molecular_function unknown; INVOLVED IN: biological_process unknown; LOCATED IN: cellular_component unknown; EXPRESSED IN: 22 plant structures; EXPRESSED DURING: 13 growth stages; CONTAINS InterPro DOMAIN/s: Prefoldin (InterPro:IPR009053); Has 8 Blast hits to 8 proteins in 4 species: Archae - 0; Bacteria - 0; Metazoa - 1; Fungi - 0; Plants - 7; Viruses - 0; Ot…
Bra014191	A08:2678458-2679216	0.106773	0	-Inf	0.092608	0	-Inf	AT1G49475 (E=9e-048) | DNA binding / transcription factor
Bra014200	A08:2572358-2574967	0.26186	0	-Inf	0.0396458	0	-Inf	AT1G49570 (E=1e-153) | peroxidase, putative
Bra014213	A08:2451197-2452340	3.3037	0	-Inf	1.4485	0	-Inf	AT1G49650 (E=3e-157) | cell death associated protein-related
Bra014237	A08:2296907-2298908	0.178334	0	-Inf	0.11426	0	-Inf	AT1G71400 (E=2e-184) AtRLP12 | AtRLP12 (Receptor Like Protein 12); protein binding
Bra014244	A08:2239940-2242388	12.1007	0	-Inf	4.10162	0	-Inf	AT1G50280 (E=1e-212) | phototropic-responsive NPH3 family protein
Bra014248	A08:2208793-2212517	0.0685697	0	-Inf	0.0614876	0	-Inf	AT1G50380 (E=0.0) | prolyl oligopeptidase family protein
Bra014266	A08:2093611-2094937	2.06584	0	-Inf	3.64336	0	-Inf	AT5G01980 (E=4e-097) | zinc finger (C3HC4-type RING finger) family protein
Bra014270	A08:2075510-2075825	1.69344	0	-Inf	1.58983	0	-Inf	AT1G51355 (E=2e-023) | unknown protein
Bra014275	A08:2042407-2043778	0.0585993	0	-Inf	0.0301051	0	-Inf	AT1G51210 (E=3e-166) | UDP-glucoronosyl/UDP-glucosyl transferase family protein
Bra014279	A08:2005982-2007584	4.55179	0	-Inf	4.3071	0	-Inf	AT1G51160 (E=2e-095) | synbindin, putative
Bra014285	A08:1953653-1954145	49.8232	0	-Inf	54.6794	0	-Inf	AT1G51060 (E=2e-047) HTA10 | HTA10; DNA binding
Bra014295	A08:1859559-1860627	4.64011	0	-Inf	5.43091	0	-Inf	AT1G51660 (E=2e-138) ATMKK4, MKK4, ATMEK4 | ATMKK4 (ARABIDOPSIS THALIANA MITOGEN-ACTIVATED PROTEIN KINASE KINASE 4); MAP kinase kinase/ kinase
Bra014297	A08:1851871-1852474	9.53224	0	-Inf	5.51789	0	-Inf	AT1G51700 (E=2e-059) ADOF1 | ADOF1; DNA binding / transcription factor
Bra014306	A08:1801726-1803053	0.0670814	0	-Inf	0.0172471	0	-Inf	AT1G52030 (E=6e-089) MBP2, MBP1.2, F-ATMBP | MBP2 (MYROSINASE-BINDING PROTEIN 2); sugar binding / thioglucosidase binding
Bra014319	A08:1665649-1668502	0.106327	0	-Inf	0.0341692	0	-Inf	AT1G52260 (E=1e-154) ATPDIL1-5, ATPDI3, PDI3 | ATPDIL1-5 (PDI-LIKE 1-5); protein disulfide isomerase
Bra014327	A08:1586507-1586984	1.74875	0	-Inf	0.428005	0	-Inf	AT2G01300 (E=5e-057) | unknown protein
Bra014328	A08:1584405-1585209	18.9283	0	-Inf	30.6594	0	-Inf	AT2G01290 (E=9e-132) | ribose-5-phosphate isomerase
Bra014339	A08:1507302-1507758	2.0284	0	-Inf	5.28713	0	-Inf	AT1G15100 (E=2e-037) RHA2A | RHA2A; protein binding / ubiquitin-protein ligase/ zinc ion binding
Bra014354	A08:1437425-1437992	12.6844	0	-Inf	3.89832	0	-Inf	AT1G55210 (E=8e-092) | disease resistance response
Bra014361	A08:1403873-1404607	37.1329	0	-Inf	47.7834	0	-Inf	AT1G55160 (E=3e-042) | unknown protein
Bra014364	A08:1388511-1392978	0.0148845	0	-Inf	0.0190354	0	-Inf	AT1G54280 (E=0.0) | haloacid dehalogenase-like hydrolase family protein
Bra014371	A08:1343843-1349059	1.59458	0	-Inf	1.69987	0	-Inf	AT1G54030 (E=1e-171) | GDSL-motif lipase, putative
Bra014372	A08:1325951-1328598	0.657528	0	-Inf	0.150367	0	-Inf	AT1G54010 (E=3e-185) | myrosinase-associated protein, putative
Bra014392	A04:287406-288225	0.0948552	0	-Inf	0.0306542	0	-Inf	AT3G62780 (E=3e-073) | C2 domain-containing protein
Bra014404	A04:338520-343670	0.603349	0	-Inf	0.337605	0	-Inf	AT3G62270 (E=0.0) | anion exchange family protein
Bra014420	A04:532512-533964	2.21476	0	-Inf	4.67817	0	-Inf	AT3G61820 (E=2e-204) | aspartyl protease family protein
Bra014425	A04:559120-561752	0.05399	0	-Inf	0.128504	0	-Inf	AT3G61680 (E=6e-259) | lipase class 3 family protein
Bra014426	A04:569866-570885	0.253794	0	-Inf	0.685732	0	-Inf	AT2G46400 (E=7e-058) WRKY46, ATWRKY46 | WRKY46; transcription factor
Bra014430	A04:600622-601972	1.05158	0	-Inf	0.67539	0	-Inf	AT3G61580 (E=9e-237) | delta-8 sphingolipid desaturase (SLD1)
Bra014431	A04:607731-608598	3.52391	0	-Inf	0.994448	0	-Inf	AT5G47540 (E=7e-061) | binding
Bra014438	A04:645600-647240	0.11474	0	-Inf	0.029652	0	-Inf	AT3G61410 (E=1e-071) | FUNCTIONS IN: molecular_function unknown; INVOLVED IN: biological_process unknown; LOCATED IN: cellular_component unknown; BEST Arabidopsis thaliana protein match is: protein kinase family protein / U-box domain-containing protein (TAIR:AT2G45910.1); Has 146 Blast hits to 144 proteins in 9 species: Archae - 0; Bacteria - 0; Metazoa - 13; Fungi - 0; Plants - 132; Viruses - 0…
Bra014444	A04:668943-675991	0.662455	0	-Inf	0.912589	0	-Inf	AT3G61310 (E=2e-091) | DNA-binding family protein
Bra014446	A04:677533-678540	0.0666903	0	-Inf	1.26338	0	-Inf	AT3G61250 (E=1e-114) AtMYB17 | AtMYB17 (myb domain protein 17); DNA binding / transcription factor
Bra014450	A04:712907-713417	1.05468	0	-Inf	0.730017	0	-Inf	AT3G61190 (E=3e-045) BAP1 | BAP1 (BON ASSOCIATION PROTEIN 1); phospholipid binding / protein binding
Bra014462	A04:778451-780921	0.0209107	0	-Inf	0.0670967	0	-Inf	AT2G45570 (E=4e-159) CYP76C2 | CYP76C2; electron carrier/ heme binding / iron ion binding / monooxygenase/ oxygen binding
Bra014464	A04:798267-798639	2.64061	0	-Inf	0.756451	0	-Inf	AT3G60890 (E=2e-012) ZPR2 | ZPR2 (LITTLE ZIPPER 2); protein binding
Bra014479	A04:912914-913463	1.99413	0	-Inf	1.86511	0	-Inf	AT3G60630 (E=8e-081) | scarecrow transcription factor family protein
Bra014489	A04:1001175-1002501	2.90606	0	-Inf	0.146662	0	-Inf	AT3G60440 (E=6e-123) | LOCATED IN: chloroplast; EXPRESSED IN: 19 plant structures; EXPRESSED DURING: 13 growth stages; CONTAINS InterPro DOMAIN/s: Phosphoglycerate mutase (InterPro:IPR013078), PRIB5 (InterPro:IPR012398); BEST Arabidopsis thaliana protein match is: unknown protein (TAIR:AT3G60450.1); Has 180 Blast hits to 178 proteins in 74 species: Archae - 0; Bacteria - 37; Metazoa - 8; Fungi - …
Bra014490	A04:1004174-1005563	0.0992723	0	-Inf	0.192605	0	-Inf	AT3G60420 (E=2e-107) | LOCATED IN: cellular_component unknown; EXPRESSED IN: 17 plant structures; EXPRESSED DURING: 10 growth stages; CONTAINS InterPro DOMAIN/s: Phosphoglycerate mutase (InterPro:IPR013078), PRIB5 (InterPro:IPR012398); BEST Arabidopsis thaliana protein match is: unknown protein (TAIR:AT3G60450.1); Has 181 Blast hits to 179 proteins in 72 species: Archae - 0; Bacteria - 53; Metazo…
Bra014491	A04:1008114-1009431	0.220792	0	-Inf	0.158632	0	-Inf	AT3G60420 (E=6e-106) | LOCATED IN: cellular_component unknown; EXPRESSED IN: 17 plant structures; EXPRESSED DURING: 10 growth stages; CONTAINS InterPro DOMAIN/s: Phosphoglycerate mutase (InterPro:IPR013078), PRIB5 (InterPro:IPR012398); BEST Arabidopsis thaliana protein match is: unknown protein (TAIR:AT3G60450.1); Has 181 Blast hits to 179 proteins in 72 species: Archae - 0; Bacteria - 53; Metazo…
Bra014497	A04:1037996-1040890	0.757504	0	-Inf	0.236417	0	-Inf	AT3G60320 (E=6e-306) | DNA binding
Bra014504	A04:1062072-1063065	10.5191	0	-Inf	8.91794	0	-Inf	AT5G42520 (E=9e-086) BPC6, BBR/BPC6, ATBPC6 | ATBPC6; DNA binding / transcription factor
Bra014506	A04:1074251-1075127	2.53079	0	-Inf	2.15986	0	-Inf	AT3G60200 (E=1e-066) | unknown protein
Bra014512	A04:1129205-1131560	0.152659	0	-Inf	0.333981	0	-Inf	AT3G60110 (E=5e-115) | DNA binding
Bra014543	A04:1316967-1318860	0.370298	0	-Inf	0.0681584	0	-Inf	AT3G59340 (E=5e-140) | unknown protein
Bra014544	A04:1329340-1330692	0.452484	0	-Inf	0.249227	0	-Inf	AT2G28580 (E=4e-114) | unknown protein
Bra014546	A04:1346034-1347127	1.46615	0	-Inf	3.29648	0	-Inf	AT3G59280 (E=5e-051) TXR1 | TXR1 (THAXTOMIN A RESISTANT 1)
Bra014547	A04:1347709-1349111	0.646673	0	-Inf	0.194825	0	-Inf	AT3G59220 (E=1e-135) PRN, PRN1, ATPIRIN1 | PRN (PIRIN); calmodulin binding
Bra014551	A04:1399447-1399798	5.4498	0	-Inf	2.34862	0	-Inf	AT3G58850 (E=5e-038) PAR2, HLH2 | PAR2 (PHY RAPIDLY REGULATED 2)
Bra014556	A04:1434667-1436535	2.45692	0	-Inf	6.66326	0	-Inf	AT3G58710 (E=6e-121) WRKY69, ATWRKY69 | WRKY69; transcription factor
Bra014559	A04:1451493-1452224	459.212	0	-Inf	765.431	0	-Inf	AT3G58680 (E=4e-069) MBF1B, ATMBF1B | MBF1B (MULTIPROTEIN BRIDGING FACTOR 1B); DNA binding / transcription coactivator
Bra014577	A04:1540418-1541590	0.0703588	0	-Inf	0.151563	0	-Inf	AT3G58260 (E=1e-053) | meprin and TRAF homology domain-containing protein / MATH domain-containing protein
Bra014587	A04:1619476-1620037	0.0909107	0	-Inf	0.0594548	0	-Inf	AT1G65870 (E=5e-073) | disease resistance-responsive family protein
Bra014594	A04:1650916-1651450	0.251387	0	-Inf	0.527472	0	-Inf	AT3G58000 (E=1e-048) | VQ motif-containing protein
Bra014595	A04:1654345-1657097	20.8759	0	-Inf	24.6429	0	-Inf	AT3G57990 (E=3e-139) | unknown protein
Bra014597	A04:1662724-1663267	2.28234	0	-Inf	0.763478	0	-Inf	AT3G57950 (E=3e-059) | unknown protein
Bra014604	A04:1718016-1720272	0.27799	0	-Inf	0.0334182	0	-Inf	AT3G57780 (E=1e-133) | EXPRESSED IN: 20 plant structures; EXPRESSED DURING: 13 growth stages; BEST Arabidopsis thaliana protein match is: nucleolar protein gar2-related (TAIR:AT2G42320.2); Has 3024 Blast hits to 2177 proteins in 255 species: Archae - 2; Bacteria - 181; Metazoa - 988; Fungi - 289; Plants - 172; Viruses - 72; Other Eukaryotes - 1320 (source: NCBI BLink).
[truncated: 3,475 more rows]

## Sheet: GO_upregulated
source	term_name	term_id	adjusted_p_value	negative_log10_of_adjusted_p_value	term_size	query_size	intersection_size	effective_domain_size	intersections
GO:MF	hexosyltransferase activity	GO:0016758	0.00144122	2.84127	338	249	15	23305	BRA020434,BRA001229,BRA010065,BRA010102,BRA011900,BRA013922,BRA014975,BRA015104,BRA024089,BRA030055,BRA034821,BRA037614,BRA037793,BRA039138,BRA039149
GO:MF	oxygen evolving activity	GO:0010242	0.00429778	2.36676	5	249	3	23305	BRA012083,BRA031813,BRA037164
GO:MF	glycosyltransferase activity	GO:0016757	0.0288699	1.53956	707	249	20	23305	BRA006378,BRA020434,BRA000635,BRA001229,BRA004310,BRA010065,BRA010102,BRA011900,BRA013922,BRA014975,BRA015104,BRA024089,BRA030055,BRA034608,BRA034821,BRA037614,BRA037793,BRA038960,BRA039138,BRA039149
GO:BP	photosynthesis	GO:0015979	2.52e-10	9.59911	204	206	20	17279	BRA022707,BRA005423,BRA005425,BRA010807,BRA012083,BRA014433,BRA015696,BRA020809,BRA022976,BRA023176,BRA024261,BRA027083,BRA028181,BRA029563,BRA031427,BRA031534,BRA031813,BRA034911,BRA037164,BRA037913
GO:BP	photosynthesis, light reaction	GO:0019684	5.33e-07	6.27291	114	206	13	17279	BRA022707,BRA005423,BRA005425,BRA010807,BRA012083,BRA014433,BRA020809,BRA022976,BRA027083,BRA031427,BRA031813,BRA037164,BRA037913
GO:BP	photosynthesis, light harvesting	GO:0009765	1.61711e-06	5.79126	46	206	9	17279	BRA022707,BRA005423,BRA005425,BRA010807,BRA014433,BRA022976,BRA027083,BRA031427,BRA037913
GO:BP	generation of precursor metabolites and energy	GO:0006091	5.15839e-06	5.28749	355	206	20	17279	BRA022707,BRA040469,BRA001575,BRA005423,BRA005425,BRA010807,BRA011387,BRA012083,BRA014433,BRA020809,BRA022976,BRA023693,BRA027083,BRA027109,BRA028124,BRA031427,BRA031813,BRA037164,BRA037750,BRA037913
GO:BP	photosystem II stabilization	GO:0042549	0.0296976	1.52728	7	206	3	17279	BRA012083,BRA031813,BRA037164
GO:BP	xyloglucan metabolic process	GO:0010411	0.0374098	1.42701	59	206	6	17279	BRA020434,BRA010065,BRA013922,BRA014975,BRA024089,BRA037614
GO:BP	photosystem II assembly	GO:0010207	0.0430752	1.36577	20	206	4	17279	BRA012083,BRA020809,BRA031813,BRA037164
GO:CC	photosystem	GO:0009521	5.81605e-05	4.23537	75	107	9	8111	BRA012083,BRA015696,BRA023176,BRA024261,BRA029563,BRA031534,BRA031813,BRA034911,BRA037164
GO:CC	photosystem II oxygen evolving complex	GO:0009654	0.000505618	3.29618	34	107	6	8111	BRA012083,BRA015696,BRA029563,BRA031534,BRA031813,BRA037164
GO:CC	photosynthetic membrane	GO:0034357	0.000510636	3.29189	152	107	11	8111	BRA012083,BRA015696,BRA020809,BRA023176,BRA024261,BRA029563,BRA031534,BRA031813,BRA034911,BRA037164,BRA038381
GO:CC	thylakoid	GO:0009579	0.00330226	2.48119	185	107	11	8111	BRA012083,BRA015696,BRA020809,BRA023176,BRA024261,BRA029563,BRA031534,BRA031813,BRA034911,BRA037164,BRA038381
GO:CC	photosystem II	GO:0009523	0.0044783	2.34889	49	107	6	8111	BRA012083,BRA015696,BRA029563,BRA031534,BRA031813,BRA037164
GO:CC	oxidoreductase complex	GO:1990204	0.00495474	2.30498	99	107	8	8111	BRA012083,BRA015696,BRA028124,BRA029563,BRA029833,BRA031534,BRA031813,BRA037164
GO:CC	thylakoid membrane	GO:0042651	0.0143847	1.8421	115	107	8	8111	BRA012083,BRA015696,BRA020809,BRA029563,BRA031534,BRA031813,BRA037164,BRA038381
GO:CC	cell wall	GO:0005618	0.0192472	1.71563	90	107	7	8111	BRA020434,BRA011901,BRA013922,BRA014975,BRA024089,BRA025372,BRA037614
GO:CC	external encapsulating structure	GO:0030312	0.0393553	1.405	101	107	7	8111	BRA020434,BRA011901,BRA013922,BRA014975,BRA024089,BRA025372,BRA037614

## Sheet: GO_downregulated
source	term_name	term_id	adjusted_p_value	negative_log10_of_adjusted_p_value	term_size	query_size	intersection_size	effective_domain_size	intersections
GO:MF	DNA-binding transcription factor activity	GO:0003700	4.11e-11	10.3858	1500	3112	299	23305	BRA000008,BRA000046,BRA000180,BRA000195,BRA000245,BRA000366,BRA000395,BRA000749,BRA001005,BRA001377,BRA001588,BRA001615,BRA001752,BRA001826,BRA001885,BRA002090,BRA002262,BRA002836,BRA002882,BRA003462,BRA003482,BRA003582,BRA003588,BRA003749,BRA003755,BRA003772,BRA003780,BRA003883,BRA003924,BRA003936,BRA004076,BRA004245,BRA004312,BRA004330,BRA004370,BRA004466,BRA004532,BRA004548,BRA004582,BRA004599…
GO:MF	transcription regulator activity	GO:0140110	6.74e-10	9.17154	1609	3112	311	23305	BRA000008,BRA000046,BRA000180,BRA000195,BRA000245,BRA000366,BRA000395,BRA000749,BRA001005,BRA001377,BRA001588,BRA001615,BRA001752,BRA001826,BRA001885,BRA002090,BRA002262,BRA002836,BRA002882,BRA003462,BRA003482,BRA003582,BRA003588,BRA003749,BRA003755,BRA003772,BRA003780,BRA003883,BRA003924,BRA003936,BRA004076,BRA004245,BRA004312,BRA004330,BRA004370,BRA004466,BRA004532,BRA004548,BRA004582,BRA004599…
GO:MF	DNA binding	GO:0003677	1.2028e-06	5.91981	2581	3112	442	23305	BRA000006,BRA000008,BRA000038,BRA000046,BRA000180,BRA000366,BRA000465,BRA000481,BRA000680,BRA000749,BRA000897,BRA001005,BRA001377,BRA001461,BRA001588,BRA001596,BRA001597,BRA001615,BRA001696,BRA001801,BRA001885,BRA002262,BRA002408,BRA002436,BRA002520,BRA002610,BRA002792,BRA002880,BRA002882,BRA003130,BRA003150,BRA003194,BRA003213,BRA003349,BRA003462,BRA003482,BRA003588,BRA003780,BRA003846,BRA003883…
GO:MF	protein binding	GO:0005515	2.19133e-05	4.65929	5618	3112	869	23305	BRA000006,BRA000077,BRA000119,BRA000267,BRA000291,BRA000318,BRA000342,BRA000361,BRA000369,BRA000388,BRA000399,BRA000444,BRA000481,BRA000514,BRA000555,BRA000599,BRA000633,BRA000644,BRA000669,BRA000750,BRA000759,BRA000862,BRA000870,BRA000893,BRA000902,BRA000970,BRA001001,BRA001006,BRA001043,BRA001044,BRA001047,BRA001093,BRA001115,BRA001148,BRA001225,BRA001264,BRA001327,BRA001357,BRA001460,BRA001492…
GO:MF	glutathione oxidoreductase activity	GO:0097573	0.000651228	3.18627	84	3112	28	23305	BRA003199,BRA004424,BRA005898,BRA006236,BRA006467,BRA007110,BRA007718,BRA008925,BRA014646,BRA015272,BRA016941,BRA023284,BRA023448,BRA025638,BRA027220,BRA028812,BRA028902,BRA029532,BRA030102,BRA031540,BRA032540,BRA032911,BRA037028,BRA038686,BRA039044,BRA000810,BRA011408,BRA040917
GO:MF	protein heterodimerization activity	GO:0046982	0.000710495	3.14844	137	3112	39	23305	BRA000006,BRA000481,BRA001615,BRA002436,BRA002520,BRA002835,BRA003150,BRA005185,BRA006639,BRA006685,BRA006699,BRA007023,BRA009949,BRA011521,BRA011929,BRA012318,BRA014285,BRA017178,BRA018647,BRA018691,BRA020275,BRA020278,BRA020297,BRA021157,BRA022147,BRA023937,BRA026434,BRA027199,BRA030460,BRA031378,BRA033668,BRA035673,BRA035677,BRA035755,BRA036619,BRA038267,BRA038268,BRA038724,BRA028869
GO:MF	disulfide oxidoreductase activity	GO:0015036	0.0372632	1.42872	123	3112	32	23305	BRA003199,BRA004424,BRA005898,BRA006236,BRA006467,BRA007110,BRA007718,BRA008188,BRA008925,BRA014646,BRA015272,BRA016503,BRA016941,BRA023284,BRA023448,BRA025638,BRA027220,BRA028812,BRA028902,BRA029532,BRA030102,BRA031540,BRA032540,BRA032911,BRA037028,BRA038686,BRA039044,BRA000810,BRA011408,BRA025749,BRA027250,BRA040917
GO:BP	regulation of biological process	GO:0050789	2.39e-15	14.6223	4093	2247	699	17279	BRA000008,BRA000046,BRA000072,BRA000073,BRA000077,BRA000165,BRA000195,BRA000361,BRA000366,BRA000369,BRA000372,BRA000465,BRA000468,BRA000479,BRA000555,BRA000677,BRA000749,BRA000759,BRA000888,BRA000910,BRA001005,BRA001043,BRA001367,BRA001377,BRA001588,BRA001596,BRA001597,BRA001615,BRA001736,BRA001801,BRA001805,BRA001826,BRA001885,BRA001944,BRA002090,BRA002153,BRA002154,BRA002262,BRA002307,BRA002408…
GO:BP	biological regulation	GO:0065007	9.12e-15	14.0401	4347	2247	732	17279	BRA000008,BRA000046,BRA000072,BRA000073,BRA000077,BRA000165,BRA000195,BRA000361,BRA000366,BRA000369,BRA000372,BRA000465,BRA000468,BRA000479,BRA000555,BRA000677,BRA000749,BRA000759,BRA000888,BRA000910,BRA001005,BRA001043,BRA001367,BRA001377,BRA001588,BRA001596,BRA001597,BRA001615,BRA001657,BRA001736,BRA001801,BRA001805,BRA001826,BRA001885,BRA001944,BRA002090,BRA002153,BRA002154,BRA002262,BRA002307…
GO:BP	regulation of cellular process	GO:0050794	2.24e-14	13.6507	3578	2247	620	17279	BRA000008,BRA000046,BRA000077,BRA000195,BRA000361,BRA000366,BRA000369,BRA000372,BRA000465,BRA000479,BRA000555,BRA000677,BRA000749,BRA000759,BRA001005,BRA001367,BRA001377,BRA001588,BRA001596,BRA001597,BRA001615,BRA001736,BRA001801,BRA001805,BRA001826,BRA001885,BRA002090,BRA002153,BRA002154,BRA002262,BRA002307,BRA002408,BRA002572,BRA002594,BRA002629,BRA002792,BRA002834,BRA002882,BRA003094,BRA003194…
GO:BP	regulation of nucleobase-containing compound metabolic process	GO:0019219	5.48e-13	12.261	2231	2247	414	17279	BRA000008,BRA000046,BRA000077,BRA000195,BRA000366,BRA000372,BRA000465,BRA000479,BRA000749,BRA001005,BRA001367,BRA001377,BRA001588,BRA001596,BRA001597,BRA001615,BRA001801,BRA001805,BRA001826,BRA001885,BRA002090,BRA002262,BRA002307,BRA002408,BRA002572,BRA002792,BRA002882,BRA003194,BRA003422,BRA003462,BRA003484,BRA003588,BRA003749,BRA003755,BRA003780,BRA003883,BRA003924,BRA003936,BRA004330,BRA004370…
GO:BP	regulation of nitrogen compound metabolic process	GO:0051171	8.42e-12	11.0745	2401	2247	434	17279	BRA000008,BRA000046,BRA000077,BRA000195,BRA000361,BRA000366,BRA000369,BRA000372,BRA000465,BRA000479,BRA000749,BRA001005,BRA001367,BRA001377,BRA001588,BRA001596,BRA001597,BRA001615,BRA001736,BRA001801,BRA001805,BRA001826,BRA001885,BRA002090,BRA002262,BRA002307,BRA002408,BRA002572,BRA002792,BRA002882,BRA003194,BRA003422,BRA003462,BRA003484,BRA003588,BRA003749,BRA003755,BRA003780,BRA003883,BRA003924…
GO:BP	regulation of macromolecule metabolic process	GO:0060255	3.25e-11	10.4886	2609	2247	462	17279	BRA000008,BRA000046,BRA000072,BRA000073,BRA000077,BRA000195,BRA000361,BRA000366,BRA000369,BRA000372,BRA000465,BRA000479,BRA000749,BRA000888,BRA001005,BRA001367,BRA001377,BRA001588,BRA001596,BRA001597,BRA001615,BRA001736,BRA001801,BRA001805,BRA001826,BRA001885,BRA001944,BRA002090,BRA002262,BRA002307,BRA002408,BRA002572,BRA002792,BRA002882,BRA003194,BRA003422,BRA003462,BRA003484,BRA003588,BRA003749…
GO:BP	regulation of primary metabolic process	GO:0080090	6.03e-11	10.2196	2443	2247	436	17279	BRA000008,BRA000046,BRA000077,BRA000195,BRA000361,BRA000366,BRA000369,BRA000372,BRA000465,BRA000479,BRA000749,BRA001005,BRA001367,BRA001377,BRA001588,BRA001596,BRA001597,BRA001615,BRA001736,BRA001801,BRA001805,BRA001826,BRA001885,BRA002090,BRA002262,BRA002307,BRA002408,BRA002572,BRA002792,BRA002882,BRA003194,BRA003422,BRA003462,BRA003484,BRA003588,BRA003749,BRA003755,BRA003780,BRA003883,BRA003924…
GO:BP	regulation of RNA biosynthetic process	GO:2001141	1.38e-10	9.86069	2121	2247	386	17279	BRA000008,BRA000046,BRA000195,BRA000366,BRA000372,BRA000465,BRA000749,BRA001005,BRA001377,BRA001588,BRA001596,BRA001597,BRA001615,BRA001801,BRA001826,BRA001885,BRA002090,BRA002262,BRA002307,BRA002408,BRA002792,BRA002882,BRA003194,BRA003422,BRA003462,BRA003484,BRA003588,BRA003749,BRA003755,BRA003780,BRA003883,BRA003924,BRA003936,BRA004330,BRA004370,BRA004465,BRA004466,BRA004532,BRA004548,BRA004582…
GO:BP	regulation of nucleic acid-templated transcription	GO:1903506	1.38e-10	9.86069	2121	2247	386	17279	BRA000008,BRA000046,BRA000195,BRA000366,BRA000372,BRA000465,BRA000749,BRA001005,BRA001377,BRA001588,BRA001596,BRA001597,BRA001615,BRA001801,BRA001826,BRA001885,BRA002090,BRA002262,BRA002307,BRA002408,BRA002792,BRA002882,BRA003194,BRA003422,BRA003462,BRA003484,BRA003588,BRA003749,BRA003755,BRA003780,BRA003883,BRA003924,BRA003936,BRA004330,BRA004370,BRA004465,BRA004466,BRA004532,BRA004548,BRA004582…
GO:BP	regulation of DNA-templated transcription	GO:0006355	1.38e-10	9.86069	2121	2247	386	17279	BRA000008,BRA000046,BRA000195,BRA000366,BRA000372,BRA000465,BRA000749,BRA001005,BRA001377,BRA001588,BRA001596,BRA001597,BRA001615,BRA001801,BRA001826,BRA001885,BRA002090,BRA002262,BRA002307,BRA002408,BRA002792,BRA002882,BRA003194,BRA003422,BRA003462,BRA003484,BRA003588,BRA003749,BRA003755,BRA003780,BRA003883,BRA003924,BRA003936,BRA004330,BRA004370,BRA004465,BRA004466,BRA004532,BRA004548,BRA004582…
GO:BP	regulation of cellular metabolic process	GO:0031323	2.77e-10	9.55797	2466	2247	436	17279	BRA000008,BRA000046,BRA000077,BRA000195,BRA000361,BRA000366,BRA000369,BRA000372,BRA000465,BRA000479,BRA000749,BRA001005,BRA001367,BRA001377,BRA001588,BRA001596,BRA001597,BRA001615,BRA001736,BRA001801,BRA001805,BRA001826,BRA001885,BRA002090,BRA002262,BRA002307,BRA002408,BRA002572,BRA002792,BRA002882,BRA003194,BRA003422,BRA003462,BRA003484,BRA003588,BRA003749,BRA003755,BRA003780,BRA003883,BRA003924…
GO:BP	regulation of RNA metabolic process	GO:0051252	2.93e-10	9.53337	2165	2247	391	17279	BRA000008,BRA000046,BRA000195,BRA000366,BRA000372,BRA000465,BRA000749,BRA001005,BRA001377,BRA001588,BRA001596,BRA001597,BRA001615,BRA001801,BRA001826,BRA001885,BRA002090,BRA002262,BRA002307,BRA002408,BRA002792,BRA002882,BRA003194,BRA003422,BRA003462,BRA003484,BRA003588,BRA003749,BRA003755,BRA003780,BRA003883,BRA003924,BRA003936,BRA004330,BRA004370,BRA004465,BRA004466,BRA004532,BRA004548,BRA004582…
GO:BP	regulation of metabolic process	GO:0019222	1.12e-09	8.95229	2733	2247	472	17279	BRA000008,BRA000046,BRA000072,BRA000073,BRA000077,BRA000195,BRA000361,BRA000366,BRA000369,BRA000372,BRA000465,BRA000479,BRA000749,BRA000888,BRA001005,BRA001367,BRA001377,BRA001588,BRA001596,BRA001597,BRA001615,BRA001736,BRA001801,BRA001805,BRA001826,BRA001885,BRA001944,BRA002090,BRA002262,BRA002307,BRA002408,BRA002572,BRA002792,BRA002882,BRA003194,BRA003422,BRA003462,BRA003484,BRA003588,BRA003749…
GO:BP	regulation of macromolecule biosynthetic process	GO:0010556	2.22e-09	8.6532	2195	2247	391	17279	BRA000008,BRA000046,BRA000195,BRA000366,BRA000372,BRA000465,BRA000749,BRA001005,BRA001377,BRA001588,BRA001596,BRA001597,BRA001615,BRA001801,BRA001826,BRA001885,BRA002090,BRA002262,BRA002307,BRA002408,BRA002792,BRA002882,BRA003194,BRA003422,BRA003462,BRA003484,BRA003588,BRA003749,BRA003755,BRA003780,BRA003883,BRA003924,BRA003936,BRA004330,BRA004370,BRA004465,BRA004466,BRA004532,BRA004548,BRA004582…
GO:BP	regulation of gene expression	GO:0010468	5.13e-09	8.28994	2424	2247	423	17279	BRA000008,BRA000046,BRA000072,BRA000073,BRA000195,BRA000366,BRA000372,BRA000465,BRA000749,BRA000888,BRA001005,BRA001377,BRA001588,BRA001596,BRA001597,BRA001615,BRA001801,BRA001826,BRA001885,BRA001944,BRA002090,BRA002262,BRA002307,BRA002408,BRA002792,BRA002882,BRA003194,BRA003422,BRA003462,BRA003484,BRA003588,BRA003749,BRA003755,BRA003780,BRA003883,BRA003924,BRA003936,BRA004116,BRA004145,BRA004330…
GO:BP	regulation of cellular biosynthetic process	GO:0031326	1.48e-08	7.82835	2238	2247	393	17279	BRA000008,BRA000046,BRA000195,BRA000366,BRA000372,BRA000465,BRA000749,BRA001005,BRA001377,BRA001588,BRA001596,BRA001597,BRA001615,BRA001801,BRA001826,BRA001885,BRA002090,BRA002262,BRA002307,BRA002408,BRA002792,BRA002882,BRA003194,BRA003422,BRA003462,BRA003484,BRA003588,BRA003749,BRA003755,BRA003780,BRA003883,BRA003924,BRA003936,BRA004330,BRA004370,BRA004465,BRA004466,BRA004532,BRA004548,BRA004582…
GO:BP	regulation of biosynthetic process	GO:0009889	2.33e-08	7.63258	2252	2247	394	17279	BRA000008,BRA000046,BRA000195,BRA000366,BRA000372,BRA000465,BRA000749,BRA001005,BRA001377,BRA001588,BRA001596,BRA001597,BRA001615,BRA001801,BRA001826,BRA001885,BRA002090,BRA002262,BRA002307,BRA002408,BRA002792,BRA002882,BRA003194,BRA003422,BRA003462,BRA003484,BRA003588,BRA003749,BRA003755,BRA003780,BRA003883,BRA003924,BRA003936,BRA004330,BRA004370,BRA004465,BRA004466,BRA004532,BRA004548,BRA004582…
GO:BP	RNA biosynthetic process	GO:0032774	8.7e-08	7.06053	2369	2247	408	17279	BRA000008,BRA000046,BRA000195,BRA000366,BRA000372,BRA000465,BRA000749,BRA001005,BRA001377,BRA001588,BRA001596,BRA001597,BRA001615,BRA001801,BRA001826,BRA001885,BRA002090,BRA002262,BRA002307,BRA002408,BRA002792,BRA002882,BRA003194,BRA003422,BRA003462,BRA003484,BRA003588,BRA003749,BRA003755,BRA003772,BRA003780,BRA003883,BRA003924,BRA003936,BRA004330,BRA004370,BRA004465,BRA004466,BRA004532,BRA004548…
GO:BP	nucleic acid-templated transcription	GO:0097659	2.26e-07	6.64642	2365	2247	405	17279	BRA000008,BRA000046,BRA000195,BRA000366,BRA000372,BRA000465,BRA000749,BRA001005,BRA001377,BRA001588,BRA001596,BRA001597,BRA001615,BRA001801,BRA001826,BRA001885,BRA002090,BRA002262,BRA002307,BRA002408,BRA002792,BRA002882,BRA003194,BRA003422,BRA003462,BRA003484,BRA003588,BRA003749,BRA003755,BRA003772,BRA003780,BRA003883,BRA003924,BRA003936,BRA004330,BRA004370,BRA004465,BRA004466,BRA004532,BRA004548…
GO:BP	DNA-templated transcription	GO:0006351	2.26e-07	6.64642	2365	2247	405	17279	BRA000008,BRA000046,BRA000195,BRA000366,BRA000372,BRA000465,BRA000749,BRA001005,BRA001377,BRA001588,BRA001596,BRA001597,BRA001615,BRA001801,BRA001826,BRA001885,BRA002090,BRA002262,BRA002307,BRA002408,BRA002792,BRA002882,BRA003194,BRA003422,BRA003462,BRA003484,BRA003588,BRA003749,BRA003755,BRA003772,BRA003780,BRA003883,BRA003924,BRA003936,BRA004330,BRA004370,BRA004465,BRA004466,BRA004532,BRA004548…
GO:BP	DNA-templated DNA replication	GO:0006261	1.86259e-06	5.72988	86	2247	33	17279	BRA000077,BRA000479,BRA000897,BRA001367,BRA001805,BRA002572,BRA004677,BRA005808,BRA009590,BRA011922,BRA013232,BRA013240,BRA014033,BRA014270,BRA014797,BRA015098,BRA015583,BRA018272,BRA018645,BRA020397,BRA022027,BRA023914,BRA025458,BRA025573,BRA028512,BRA028788,BRA030445,BRA030687,BRA031241,BRA033756,BRA034006,BRA040301,BRA040603
GO:BP	regulation of DNA replication	GO:0006275	4.07326e-06	5.39006	45	2247	22	17279	BRA000077,BRA000479,BRA001367,BRA001805,BRA002572,BRA005808,BRA009590,BRA011922,BRA013240,BRA014270,BRA014797,BRA015583,BRA018272,BRA018645,BRA023914,BRA025573,BRA028788,BRA030445,BRA030687,BRA031241,BRA031571,BRA040603
GO:BP	nucleobase-containing compound biosynthetic process	GO:0034654	6.32717e-06	5.19879	2579	2247	427	17279	BRA000008,BRA000046,BRA000195,BRA000366,BRA000372,BRA000465,BRA000720,BRA000749,BRA001005,BRA001377,BRA001588,BRA001596,BRA001597,BRA001615,BRA001715,BRA001801,BRA001826,BRA001885,BRA002090,BRA002262,BRA002307,BRA002408,BRA002792,BRA002882,BRA003194,BRA003422,BRA003462,BRA003484,BRA003588,BRA003749,BRA003755,BRA003772,BRA003780,BRA003883,BRA003924,BRA003936,BRA004330,BRA004370,BRA004465,BRA004466…
GO:BP	aromatic compound biosynthetic process	GO:0019438	8.32846e-06	5.07944	2766	2247	453	17279	BRA000008,BRA000046,BRA000195,BRA000336,BRA000366,BRA000372,BRA000465,BRA000720,BRA000749,BRA001005,BRA001377,BRA001588,BRA001596,BRA001597,BRA001615,BRA001715,BRA001801,BRA001826,BRA001885,BRA002090,BRA002177,BRA002262,BRA002307,BRA002408,BRA002792,BRA002882,BRA003194,BRA003422,BRA003462,BRA003484,BRA003588,BRA003749,BRA003755,BRA003772,BRA003780,BRA003883,BRA003924,BRA003936,BRA004330,BRA004370…
GO:BP	regulation of DNA-templated DNA replication	GO:0090329	9.25451e-06	5.03365	43	2247	21	17279	BRA000077,BRA000479,BRA001367,BRA001805,BRA002572,BRA005808,BRA009590,BRA011922,BRA013240,BRA014270,BRA014797,BRA015583,BRA018272,BRA018645,BRA023914,BRA025573,BRA028788,BRA030445,BRA030687,BRA031241,BRA040603
GO:BP	heterocycle biosynthetic process	GO:0018130	5.67056e-05	4.24637	2765	2247	447	17279	BRA000008,BRA000046,BRA000195,BRA000366,BRA000372,BRA000465,BRA000720,BRA000749,BRA001005,BRA001377,BRA001588,BRA001596,BRA001597,BRA001615,BRA001715,BRA001801,BRA001826,BRA001885,BRA002090,BRA002177,BRA002262,BRA002307,BRA002408,BRA002792,BRA002882,BRA003194,BRA003422,BRA003462,BRA003484,BRA003588,BRA003749,BRA003755,BRA003772,BRA003780,BRA003883,BRA003924,BRA003936,BRA004330,BRA004370,BRA004465…
GO:BP	organic cyclic compound biosynthetic process	GO:1901362	6.32674e-05	4.19882	2852	2247	459	17279	BRA000008,BRA000046,BRA000195,BRA000336,BRA000366,BRA000372,BRA000465,BRA000720,BRA000749,BRA001005,BRA001377,BRA001588,BRA001596,BRA001597,BRA001615,BRA001715,BRA001801,BRA001826,BRA001885,BRA002053,BRA002090,BRA002177,BRA002262,BRA002307,BRA002408,BRA002792,BRA002882,BRA003194,BRA003422,BRA003462,BRA003484,BRA003588,BRA003749,BRA003755,BRA003772,BRA003780,BRA003883,BRA003924,BRA003936,BRA004330…
GO:BP	regulation of DNA endoreduplication	GO:0032875	0.000182034	3.73985	38	2247	18	17279	BRA000077,BRA000479,BRA001367,BRA001805,BRA002572,BRA005808,BRA009590,BRA011922,BRA013240,BRA014270,BRA015583,BRA018645,BRA023914,BRA025573,BRA028788,BRA030445,BRA030687,BRA031241
GO:BP	regulation of cell cycle	GO:0051726	0.000292944	3.53322	137	2247	40	17279	BRA000077,BRA000361,BRA000369,BRA000479,BRA001367,BRA001736,BRA001805,BRA002572,BRA003094,BRA004116,BRA004378,BRA005808,BRA008973,BRA009155,BRA009590,BRA011922,BRA012258,BRA012894,BRA013240,BRA013651,BRA014270,BRA015263,BRA015583,BRA016042,BRA016157,BRA018081,BRA018645,BRA022391,BRA023521,BRA023914,BRA025573,BRA028788,BRA030445,BRA030687,BRA031241,BRA032577,BRA034232,BRA036095,BRA036159,BRA040603
GO:BP	response to stimulus	GO:0050896	0.000331539	3.47947	3340	2247	522	17279	BRA000090,BRA000206,BRA000245,BRA000544,BRA000555,BRA000677,BRA000703,BRA000707,BRA000759,BRA000772,BRA000910,BRA000927,BRA001005,BRA001103,BRA001473,BRA001571,BRA001635,BRA001707,BRA001796,BRA002059,BRA002120,BRA002121,BRA002124,BRA002153,BRA002154,BRA002396,BRA002594,BRA002834,BRA003044,BRA003094,BRA003225,BRA003240,BRA003298,BRA003299,BRA003549,BRA003589,BRA003732,BRA003772,BRA003782,BRA003858…
GO:BP	cell cycle DNA replication	GO:0044786	0.000348574	3.45771	55	2247	22	17279	BRA000077,BRA000479,BRA001367,BRA001805,BRA002572,BRA004677,BRA005808,BRA009590,BRA011922,BRA013240,BRA014270,BRA014797,BRA015583,BRA018272,BRA018645,BRA020397,BRA023914,BRA025573,BRA028788,BRA030445,BRA030687,BRA031241
GO:BP	regulation of cell cycle process	GO:0010564	0.000480219	3.31856	91	2247	30	17279	BRA000077,BRA000479,BRA001367,BRA001805,BRA002572,BRA003094,BRA004378,BRA005808,BRA008973,BRA009155,BRA009590,BRA011922,BRA012258,BRA013240,BRA013651,BRA014270,BRA015263,BRA015583,BRA016042,BRA018081,BRA018645,BRA023521,BRA023914,BRA025573,BRA028788,BRA030445,BRA030687,BRA031241,BRA032577,BRA040603
GO:BP	DNA endoreduplication	GO:0042023	0.000777732	3.10917	45	2247	19	17279	BRA000077,BRA000479,BRA001367,BRA001805,BRA002572,BRA004677,BRA005808,BRA009590,BRA011922,BRA013240,BRA014270,BRA015583,BRA018645,BRA023914,BRA025573,BRA028788,BRA030445,BRA030687,BRA031241
GO:BP	nucleic acid metabolic process	GO:0090304	0.00424826	2.37179	3830	2247	580	17279	BRA000008,BRA000046,BRA000077,BRA000195,BRA000366,BRA000372,BRA000465,BRA000479,BRA000749,BRA000897,BRA001005,BRA001047,BRA001218,BRA001250,BRA001260,BRA001367,BRA001377,BRA001588,BRA001596,BRA001597,BRA001615,BRA001801,BRA001805,BRA001826,BRA001885,BRA002090,BRA002262,BRA002307,BRA002408,BRA002572,BRA002687,BRA002754,BRA002792,BRA002877,BRA002882,BRA003094,BRA003194,BRA003422,BRA003462,BRA003484…
GO:BP	mitochondrial RNA metabolic process	GO:0000959	0.00490382	2.30947	30	2247	14	17279	BRA004957,BRA011347,BRA013142,BRA016513,BRA018977,BRA021468,BRA021514,BRA027744,BRA029921,BRA029929,BRA031907,BRA039450,BRA039761,BRA040883
GO:BP	RNA metabolic process	GO:0016070	0.00519688	2.28426	3292	2247	505	17279	BRA000008,BRA000046,BRA000195,BRA000366,BRA000372,BRA000465,BRA000749,BRA001005,BRA001047,BRA001218,BRA001250,BRA001260,BRA001377,BRA001588,BRA001596,BRA001597,BRA001615,BRA001801,BRA001826,BRA001885,BRA002090,BRA002262,BRA002307,BRA002408,BRA002754,BRA002792,BRA002877,BRA002882,BRA003194,BRA003422,BRA003462,BRA003484,BRA003568,BRA003588,BRA003749,BRA003755,BRA003772,BRA003780,BRA003883,BRA003924…
GO:BP	protein ubiquitination	GO:0016567	0.00706735	2.15074	277	2247	62	17279	BRA000412,BRA001717,BRA002153,BRA002768,BRA004563,BRA004677,BRA005309,BRA005374,BRA005544,BRA006219,BRA006671,BRA007600,BRA007755,BRA009365,BRA010834,BRA010960,BRA013521,BRA014175,BRA014177,BRA015308,BRA016453,BRA017280,BRA018777,BRA018779,BRA018780,BRA019022,BRA019347,BRA019499,BRA022354,BRA022355,BRA022415,BRA022865,BRA023041,BRA023044,BRA025442,BRA027977,BRA029204,BRA030028,BRA030900,BRA031521…
GO:BP	response to chemical	GO:0042221	0.00718844	2.14337	1240	2247	212	17279	BRA000245,BRA000544,BRA000772,BRA001005,BRA001473,BRA001707,BRA002059,BRA002120,BRA002121,BRA002124,BRA002594,BRA003044,BRA003549,BRA003732,BRA003772,BRA003782,BRA003858,BRA003883,BRA004076,BRA004200,BRA004245,BRA004362,BRA004515,BRA004660,BRA004669,BRA005113,BRA005123,BRA005374,BRA006059,BRA006139,BRA006278,BRA006430,BRA006431,BRA006433,BRA007279,BRA007378,BRA007772,BRA008032,BRA008177,BRA008188…
GO:BP	response to endogenous stimulus	GO:0009719	0.0119687	1.92195	776	2247	141	17279	BRA000245,BRA000772,BRA001005,BRA001473,BRA001707,BRA002120,BRA002121,BRA002124,BRA002594,BRA003044,BRA003549,BRA003772,BRA003782,BRA003858,BRA003883,BRA004076,BRA004200,BRA004245,BRA004362,BRA004515,BRA004660,BRA004669,BRA005123,BRA006139,BRA006430,BRA006431,BRA006433,BRA007378,BRA007772,BRA008032,BRA008177,BRA008835,BRA008918,BRA008972,BRA008975,BRA009970,BRA010132,BRA010439,BRA010501,BRA010826…
GO:BP	response to organic substance	GO:0010033	0.0125238	1.90227	895	2247	159	17279	BRA000245,BRA000772,BRA001005,BRA001473,BRA001707,BRA002120,BRA002121,BRA002124,BRA002594,BRA003044,BRA003549,BRA003772,BRA003782,BRA003858,BRA003883,BRA004076,BRA004200,BRA004245,BRA004362,BRA004515,BRA004660,BRA004669,BRA005123,BRA005374,BRA006139,BRA006278,BRA006430,BRA006431,BRA006433,BRA007378,BRA007772,BRA008032,BRA008177,BRA008188,BRA008604,BRA008835,BRA008918,BRA008972,BRA008975,BRA009479…
GO:BP	response to hormone	GO:0009725	0.0141645	1.8488	772	2247	140	17279	BRA000245,BRA000772,BRA001005,BRA001473,BRA001707,BRA002120,BRA002121,BRA002124,BRA002594,BRA003044,BRA003549,BRA003772,BRA003782,BRA003858,BRA003883,BRA004076,BRA004200,BRA004245,BRA004362,BRA004515,BRA004660,BRA004669,BRA005123,BRA006139,BRA006430,BRA006431,BRA006433,BRA007378,BRA007772,BRA008032,BRA008177,BRA008835,BRA008918,BRA008972,BRA008975,BRA009970,BRA010132,BRA010439,BRA010501,BRA010826…
GO:BP	regulation of DNA metabolic process	GO:0051052	0.0198031	1.70327	68	2247	22	17279	BRA000077,BRA000479,BRA001367,BRA001805,BRA002572,BRA005808,BRA009590,BRA011922,BRA013240,BRA014270,BRA014797,BRA015583,BRA018272,BRA018645,BRA023914,BRA025573,BRA028788,BRA030445,BRA030687,BRA031241,BRA031571,BRA040603
GO:BP	hormone-mediated signaling pathway	GO:0009755	0.0246864	1.60754	348	2247	72	17279	BRA001005,BRA002594,BRA003772,BRA003782,BRA003883,BRA004076,BRA004200,BRA004245,BRA004362,BRA004669,BRA005123,BRA006139,BRA007772,BRA008177,BRA008835,BRA008918,BRA008972,BRA008975,BRA009970,BRA010132,BRA010439,BRA011193,BRA012024,BRA012258,BRA012570,BRA012743,BRA012838,BRA013760,BRA013950,BRA014924,BRA014925,BRA015388,BRA015478,BRA015749,BRA015885,BRA016063,BRA018207,BRA019306,BRA019622,BRA020390…
GO:BP	defense response	GO:0006952	0.0362782	1.44035	734	2247	132	17279	BRA000206,BRA000759,BRA000910,BRA000927,BRA001103,BRA001635,BRA001796,BRA002153,BRA002154,BRA002396,BRA003240,BRA003298,BRA003549,BRA004541,BRA004677,BRA004768,BRA004994,BRA005271,BRA005374,BRA005847,BRA007647,BRA007784,BRA008975,BRA009093,BRA009184,BRA009226,BRA009882,BRA009986,BRA010439,BRA010496,BRA011208,BRA011993,BRA012116,BRA012138,BRA012688,BRA012898,BRA013373,BRA013482,BRA013721,BRA013947…
GO:BP	macromolecule biosynthetic process	GO:0009059	0.0395476	1.40288	3572	2247	535	17279	BRA000008,BRA000046,BRA000195,BRA000285,BRA000366,BRA000372,BRA000465,BRA000692,BRA000749,BRA001005,BRA001098,BRA001250,BRA001377,BRA001526,BRA001588,BRA001596,BRA001597,BRA001615,BRA001801,BRA001826,BRA001857,BRA001863,BRA001885,BRA001922,BRA002090,BRA002134,BRA002262,BRA002307,BRA002408,BRA002442,BRA002754,BRA002779,BRA002792,BRA002882,BRA003194,BRA003225,BRA003422,BRA003462,BRA003484,BRA003588…
GO:BP	protein modification by small protein conjugation	GO:0032446	0.0423494	1.37315	293	2247	62	17279	BRA000412,BRA001717,BRA002153,BRA002768,BRA004563,BRA004677,BRA005309,BRA005374,BRA005544,BRA006219,BRA006671,BRA007600,BRA007755,BRA009365,BRA010834,BRA010960,BRA013521,BRA014175,BRA014177,BRA015308,BRA016453,BRA017280,BRA018777,BRA018779,BRA018780,BRA019022,BRA019347,BRA019499,BRA022354,BRA022355,BRA022415,BRA022865,BRA023041,BRA023044,BRA025442,BRA027977,BRA029204,BRA030028,BRA030900,BRA031521…
GO:CC	nucleosome	GO:0000786	5.58e-08	7.25301	90	883	32	8111	BRA000006,BRA000481,BRA001696,BRA002436,BRA002520,BRA003150,BRA005185,BRA006639,BRA006685,BRA006699,BRA007023,BRA009949,BRA011929,BRA014285,BRA017178,BRA018647,BRA018691,BRA020275,BRA020278,BRA020297,BRA022809,BRA023937,BRA026647,BRA030460,BRA035673,BRA035677,BRA035755,BRA036619,BRA038267,BRA038268,BRA028869,BRA037240
GO:CC	protein-DNA complex	GO:0032993	1.98e-07	6.70235	94	883	32	8111	BRA000006,BRA000481,BRA001696,BRA002436,BRA002520,BRA003150,BRA005185,BRA006639,BRA006685,BRA006699,BRA007023,BRA009949,BRA011929,BRA014285,BRA017178,BRA018647,BRA018691,BRA020275,BRA020278,BRA020297,BRA022809,BRA023937,BRA026647,BRA030460,BRA035673,BRA035677,BRA035755,BRA036619,BRA038267,BRA038268,BRA028869,BRA037240
GO:CC	DNA packaging complex	GO:0044815	3.98533e-06	5.39954	110	883	33	8111	BRA000006,BRA000481,BRA001696,BRA002436,BRA002520,BRA003150,BRA005185,BRA006639,BRA006685,BRA006699,BRA007023,BRA007084,BRA009949,BRA011929,BRA014285,BRA017178,BRA018647,BRA018691,BRA020275,BRA020278,BRA020297,BRA022809,BRA023937,BRA026647,BRA030460,BRA035673,BRA035677,BRA035755,BRA036619,BRA038267,BRA038268,BRA028869,BRA037240
GO:CC	chromatin	GO:0000785	0.000102114	3.99091	142	883	36	8111	BRA000006,BRA000481,BRA001696,BRA002436,BRA002520,BRA003150,BRA005185,BRA006225,BRA006639,BRA006685,BRA006699,BRA007023,BRA009949,BRA011929,BRA014285,BRA015213,BRA017178,BRA018647,BRA018691,BRA020275,BRA020278,BRA020297,BRA022809,BRA023937,BRA026647,BRA030460,BRA030818,BRA035286,BRA035673,BRA035677,BRA035755,BRA036619,BRA038267,BRA038268,BRA028869,BRA037240
GO:CC	extracellular matrix	GO:0031012	0.0308133	1.51126	10	883	6	8111	BRA004885,BRA012699,BRA016230,BRA027827,BRA029971,BRA024638
GO:CC	chromosome	GO:0005694	0.0433046	1.36347	240	883	44	8111	BRA000006,BRA000481,BRA001696,BRA002436,BRA002520,BRA003150,BRA005185,BRA006225,BRA006639,BRA006685,BRA006699,BRA007023,BRA007084,BRA008604,BRA009209,BRA009949,BRA011929,BRA014285,BRA015213,BRA016018,BRA016292,BRA017178,BRA018647,BRA018691,BRA020149,BRA020275,BRA020278,BRA020297,BRA021627,BRA022809,BRA023937,BRA026647,BRA030460,BRA030818,BRA034114,BRA035286,BRA035673,BRA035677,BRA035755,BRA036619…
